# Supplementary material for: A high-throughput yeast display approach to profile pathogen proteomes for MHC-II binding
Source: eLife. 2022 Jul 4;11:e78589. doi: 10.7554/eLife.78589 (PMC9292997; doi:10.7554/eLife.78589)
Supplement: Figure 4—figure supplement 2—source data 1. [file elife-78589-fig4-figsupp2-data1.xlsx]

## Sheet: Sheet1
	Relative binding (%)
Peptide Concentration (nM)	APKYVKQNTLKLATG			RGVYYPDKVFRSSVL			NCTFEYVSQPFLMDL			ELDKYFKNHTSPDVD			VKNKCVNFNFNGLTG			NDGVYFASTEKSNII			SQPFLMDLEGKQGNF			QPFLMDLEGKQGNFK			PAICHDGKAHFPREG			LKSFTVEKGIYQTSN			LQSYGFQPTNGVGYQ			SFSTFKCYGVSPTKL			TDAVDCALDPLSETK			DAVDCALDPLSETKC			QTLEILDITPCSFGG			TMYICGDSTECSNLL			VADYSVLYNSASFST
20000	3.68333	-7.75512	17.3926	4.83394	19.1672	16.4701	55.7859	29.8601	40.9587	57.2099	62.1933	71.9865	84.875	103.266	114.51	-3.2011	25.9265	32.4466	15.1865	-5.27777	9.74184	24.7304	19.34	43.052	102.024	82.7323	106.416	10.5121	2.40676	0.046698	7.24274	13.6776	5.43729	40.4668	46.5205	41.5856	6.08195	4.77018	5.42076	28.2309	32.4626	15.5997	-0.97678	1.14118	1.65102	-1.36347	-15.2248	5.91895	-6.02739
4000	15.3964	2.71406	13.7596	9.52557	25.0204	31.9013	99.1748	75.3453	82.4326	85.6431	85.0782	92.6249	105.891	98.3654	87.9921	26.8328	46.4466	42.1838	1.59008	5.23671	8.31749	68.1826	105.305	42.8971	88.3618	114.186	97.7143	12.421	17.177	17.3062	10.4708	16.8346	24.3428	76.7455	93.8096	97.8292	28.7097	10.4759	22.3258	59.0532	56.8752	67.2961	9.01584	0.262629	-2.8372	-5.22423	6.15185	4.22762	-2.8359
800	12.3542	16.1149	14.6236	29.1107	12.4322	12.206	38.3553	72.9716	99.4606	109.74	107.429	107.226	104.638	90.2808	105.064	62.2655	76.6174	61.5284	1.76312	22.893	6.37973	78.3096	94.7024	77.5181	91.1274	105.645	100.786	23.4576	40.8858	21.6149	33.3239	23.4387	41.7906	116.242	103.185	83.8696	46.2288	43.1628	42.1971	43.0628	59.1227	88.1	22.9087	17.6258	14.2359	3.72315	6.41573	25.7645	17.6862
160	34.3516	21.5976	23.4685	30.3951	12.7482	5.17476	92.1185	96.4343	106.984	93.3185	102.728	103.24	110.399	80.6929	113.556	73.9881	105.653	80.1847	47.8127	28.8828	42.2079	105.667	90.5636	96.1745	95.5962	101.121	111.719	72.1587	76.2013	68.6138	61.622	68.8022	77.903	99.9044	107.588	96.0365	58.9689	73.1362	62.6864	86.2295	73.9597	86.6855	31.3138	55.0515	49.5072	3.21056	15.2285	24.3767	48.8269
32	31.9076	32.8825	46.5633	16.1094	26.8763	29.0505	117.467	101.873	117.798	100.031	107.447	112.316	100.261	108.496	100.85	93.4945	97.9856	84.6618	86.0736	100.078	80.0758	106.693	103.928	112.869	104.759	104.347	96.6482	79.18	101.57	105.409	100.503	114.668	107.984	99.8836	89.1197	85.7015	95.1267	93.0321	91.7107	93.0039	101.32	92.8745	62.8261	85.2562	69.5038	19.7661	16.1303	38.7925	85.5161
6.4	87.9386	80.0127	78.4139	81.7281	72.5877	70.1844	109.647	112.485	120.898	101.093	94.3406	113.912	107.291	92.2311	111.005	100.855	114.757	100.266	89.7675	93.5132	80.2714	91.4292	95.7448	93.5181	74.2519	95.3933	119.852	90.6067	102.201	104.961	94.2382	96.5485	100.67	110.032	101.359	106.471	118.972	101.541	92.1219	97.6377	86.772	103.029	93.421	87.8406	96.6008	66.4873	64.7043	78.5063	99.0022
1.28	106.508	100.932	105.698	93.6964	101.485	92.7241	107.437	114.247	100.476	114.107	103.145	112.057	104.931	110.03	92.5803	97.5506	111.695	101.08	102.555	105.469	90.1755	94.0395	100.686	105.073	104.398	100.249	92.9399	101.77	89.5341	94.0855	113.822	92.5716	104.968	101.636	101.518	103.95	108.141	124.088	105.734	80.0412	92.758	90.4596	107.133	96.4727	95.2053	85.5619	108.764	103.175	111.066
[truncated: 26 more columns]
