# Supplementary material for: A high-throughput yeast display approach to profile pathogen proteomes for MHC-II binding
Source: eLife journal article supplement (doi:10.7554/elife.78589), 2022-07-04
Supplement: supp [file elife_poa_e78589_Figure_1_figure_supplement_1.pdf › elife_poa_e78589_Figure_1_figure_supplement_1.pdf]

|         |     | Doped |       |       |       |       | Undoped |       |       |       |      |       |       |
|---------|-----|-------|-------|-------|-------|-------|---------|-------|-------|-------|------|-------|-------|
|         |     | R0    | R1    | R2    | R3    | R4    | R0      | R1+   | R1-   | R2+   | R2-  | R3+   | R3-   |
| Doped   | R0  | 1.00  | 0.16  | 0.16  | 0.16  | 0.16  | 0.09    | 0.18  | -0.03 | 0.18  | 0.11 | 0.16  | 0.16  |
|         | R1  | 0.16  | 1.00  | 0.91  | 0.86  | 0.75  | 0.24    | 0.76  | -0.30 | 0.78  | 0.42 | 0.72  | 0.72  |
|         | R2  | 0.16  | 0.91  | 1.00  | 0.95  | 0.85  | 0.21    | 0.79  | -0.35 | 0.86  | 0.37 | 0.81  | 0.76  |
|         | R3  | 0.16  | 0.86  | 0.95  | 1.00  | 0.94  | 0.17    | 0.75  | -0.37 | 0.89  | 0.25 | 0.88  | 0.69  |
|         | R4  | 0.16  | 0.75  | 0.85  | 0.94  | 1.00  | 0.13    | 0.65  | -0.34 | 0.84  | 0.11 | 0.90  | 0.53  |
| Undoped | R0  | 0.09  | 0.24  | 0.21  | 0.17  | 0.13  | 1.00    | 0.36  | 0.41  | 0.21  | 0.42 | 0.16  | 0.27  |
|         | R1+ | 0.18  | 0.76  | 0.79  | 0.75  | 0.65  | 0.36    | 1.00  | -0.27 | 0.86  | 0.66 | 0.76  | 0.87  |
|         | R1- | -0.03 | -0.30 | -0.35 | -0.37 | -0.34 | 0.41    | -0.27 | 1.00  | -0.40 | 0.04 | -0.38 | -0.32 |
|         | R2+ | 0.18  | 0.78  | 0.86  | 0.89  | 0.84  | 0.21    | 0.86  | -0.40 | 1.00  | 0.34 | 0.94  | 0.81  |
|         | R2- | 0.11  | 0.42  | 0.37  | 0.25  | 0.11  | 0.42    | 0.66  | 0.04  | 0.34  | 1.00 | 0.18  | 0.62  |
|         | R3+ | 0.16  | 0.72  | 0.81  | 0.88  | 0.90  | 0.16    | 0.76  | -0.38 | 0.94  | 0.18 | 1.00  | 0.66  |
|         | R3- | 0.16  | 0.72  | 0.76  | 0.69  | 0.53  | 0.27    | 0.87  | -0.32 | 0.81  | 0.62 | 0.66  | 1.00  |

**Figure 1 – figure supplement 1. Correlations between selection rounds.** Pearson correlation for HLA-DR401 SARS-CoV-2 and SARS-CoV defined library members (+/- signs indicate enriched (+) or not enriched (-) yeast in undoped library; rounds of selection are indicated e.g. “R1” indicates “Round 1”, and “R0” is the unselected “Round 0” library).
