# Supplementary material for: A high-throughput yeast display approach to profile pathogen proteomes for MHC-II binding
Source: eLife journal article supplement (doi:10.7554/elife.78589), 2022-07-04
Supplement: supp [file elife_poa_e78589_Figure_2_figure_supplement_1.pdf › elife_poa_e78589_Figure_2_figure_supplement_1.pdf]

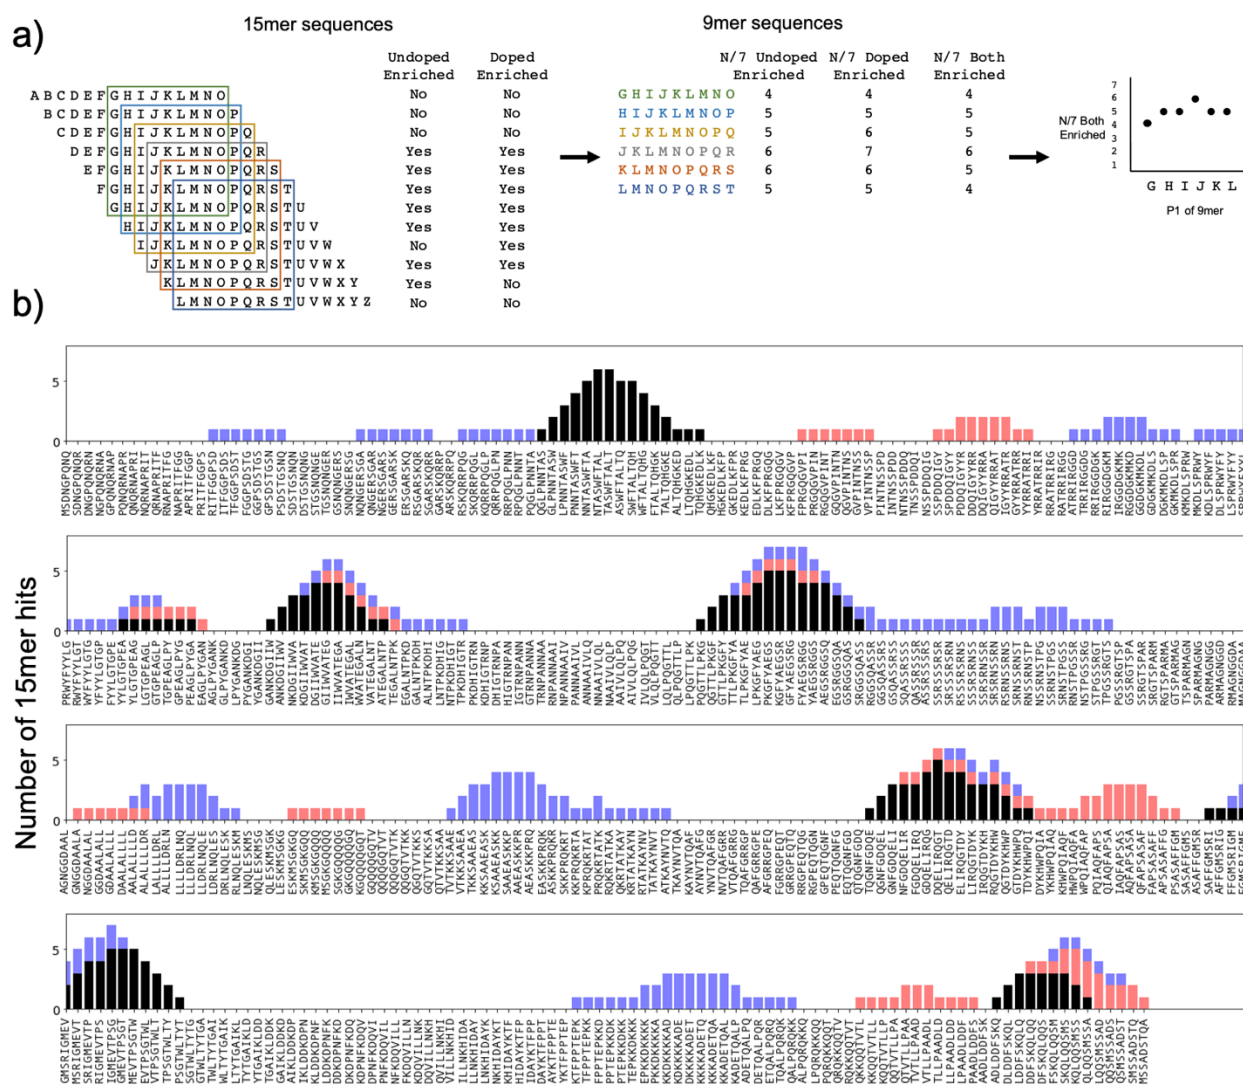

**Figure 2 – figure supplement 1. Utilizing overlapping peptides to call high confidence peptides. a)** Schematic showing use of overlapping 15mers, containing redundant 9mers. Each 9mer is present in seven 15mers; for each 9mer, we calculate how many of these seven 15mers enriched. **b)** Number of peptides containing a given 9mer that are hits, for SARS-CoV-2 nucleocapsid on HLA-DR401. Black=hits in both undoped and doped libraries; blue=hits in undoped library only; red=hits in doped library only. Enrichment categories are stacked, for a maximum of seven 15mer hits, since each 9mer is present in seven 15mers.
