# Supplementary material for: A high-throughput yeast display approach to profile pathogen proteomes for MHC-II binding
Source: eLife journal article supplement (doi:10.7554/elife.78589), 2022-07-04
Supplement: supp [file elife_poa_e78589_Figure_2_figure_supplement_2.pdf › elife_poa_e78589_Figure_2_figure_supplement_2.pdf]

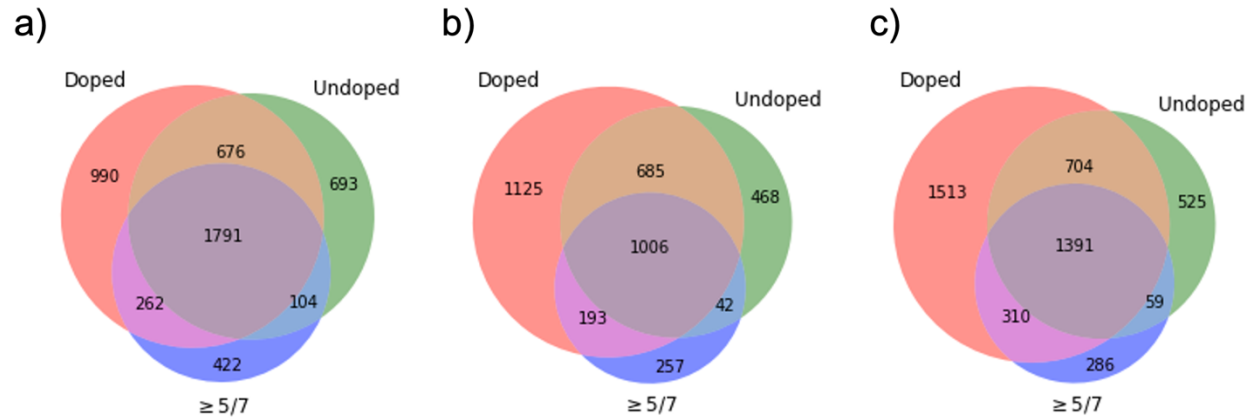

**Figure 2 – figure supplement 2. Full Venn diagrams.** Full Venn diagrams showing relationships between peptides which enriched in the doped library (“Doped”), and undoped library (“Undoped”), and contained a 9mer peptide which enriched in five or more of the seven 15mers containing it (“ $\geq 5/7$ ”), for **a)** HLA-DR401, **b)** HLA-DR402, and **c)** HLA-DR404.
