# Supplementary material for: A high-throughput yeast display approach to profile pathogen proteomes for MHC-II binding
Source: eLife journal article supplement (doi:10.7554/elife.78589), 2022-07-04
Supplement: supp [file elife_poa_e78589_Figure_2_figure_supplement_3.pdf › elife_poa_e78589_Figure_2_figure_supplement_3.pdf]

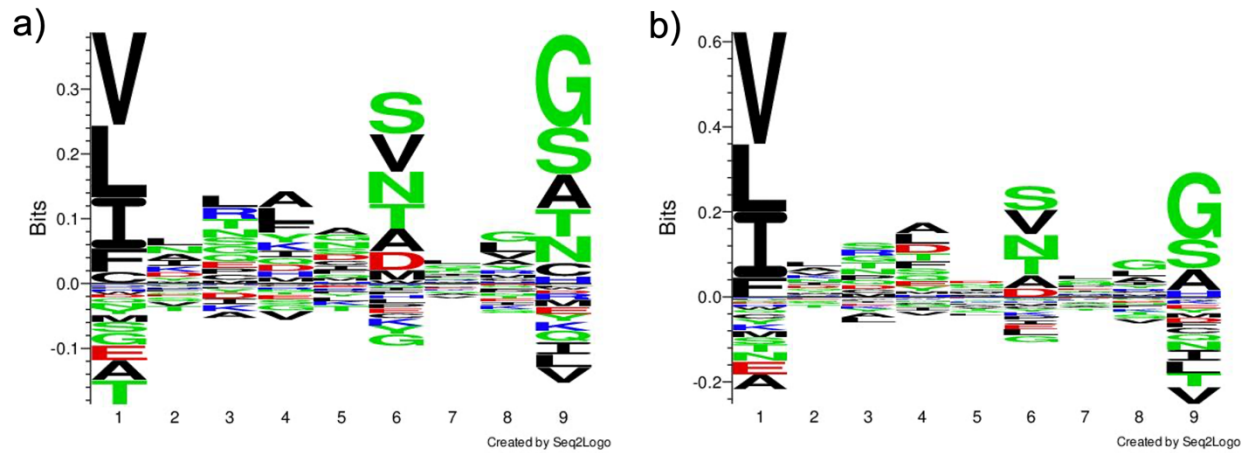

**Figure 2 – figure supplement 3. Sequence logo for HLA-DR402 and HLA-DR404. a)** HLA-DR402: Sequence logo of 1,690 peptides that enriched in both doped and undoped selections of the SARS-CoV and SARS-CoV-2 library for HLA-DR402. **b)** HLA-DR404: Sequence logo of 2,094 peptides that enriched in both doped and undoped selections of the SARS-CoV and SARS-CoV-2 library for HLA-DR404. Logos were generated with Seq2Logo-2.0.
