# Supplementary material for: A high-throughput yeast display approach to profile pathogen proteomes for MHC-II binding
Source: eLife journal article supplement (doi:10.7554/elife.78589), 2022-07-04
Supplement: supp [file elife_poa_e78589_Figure_4_figure_supplement_1.pdf › elife_poa_e78589_Figure_4_figure_supplement_1.pdf]

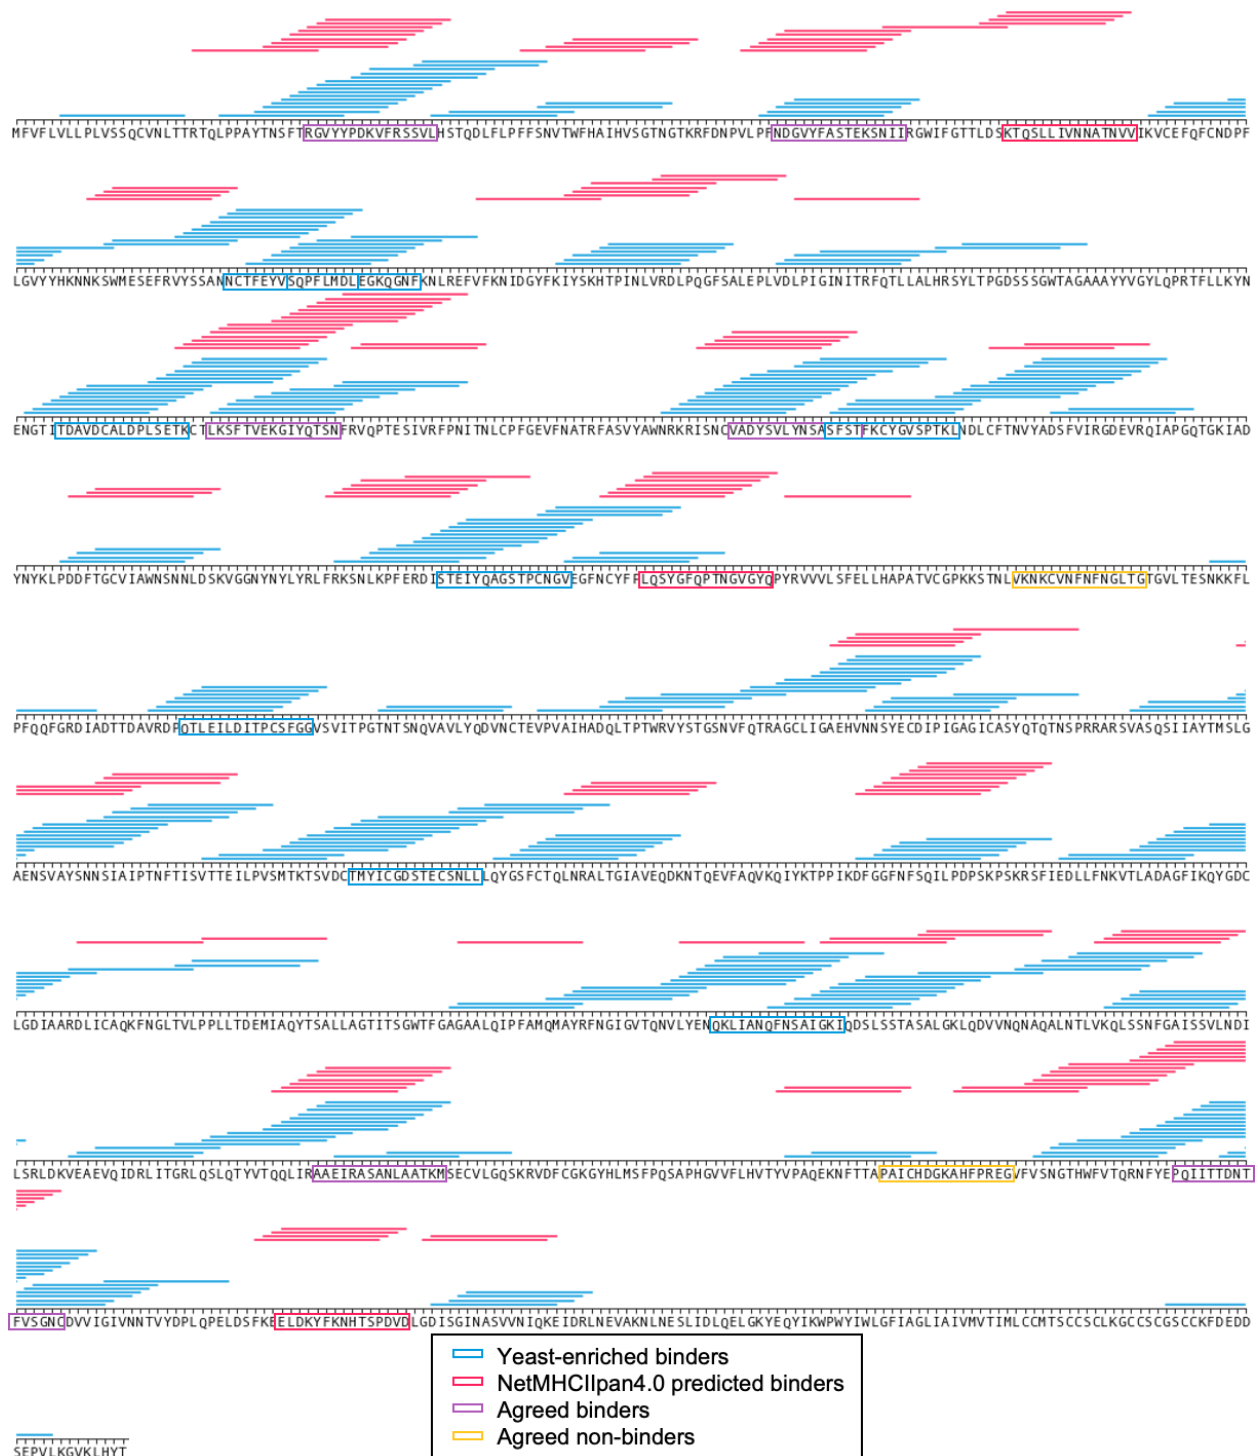

**Figure 4 – figure supplement 1. Comparing defined library selection with algorithmic predictions: SARS-CoV-2 spike protein.** 15mer peptides which enriched for binding to HLA-DR401 in both the doped and undoped libraries are indicated with horizontal lines above the enriched 15mer sequence (blue). NetMHCIIpan4.0 predicted binders (rank  $\leq 10\%$ ) on yeast-formatted peptides are shown in red. Boxed sequences are tested in subsequent fluorescent polarization experiments, and colored as indicated in the legend.
