# Supplementary material for: A high-throughput yeast display approach to profile pathogen proteomes for MHC-II binding
Source: eLife journal article supplement (doi:10.7554/elife.78589), 2022-07-04
Supplement: supp [file elife_poa_e78589_Figure_4_figure_supplement_2.pdf › elife_poa_e78589_Figure_4_figure_supplement_2.pdf]

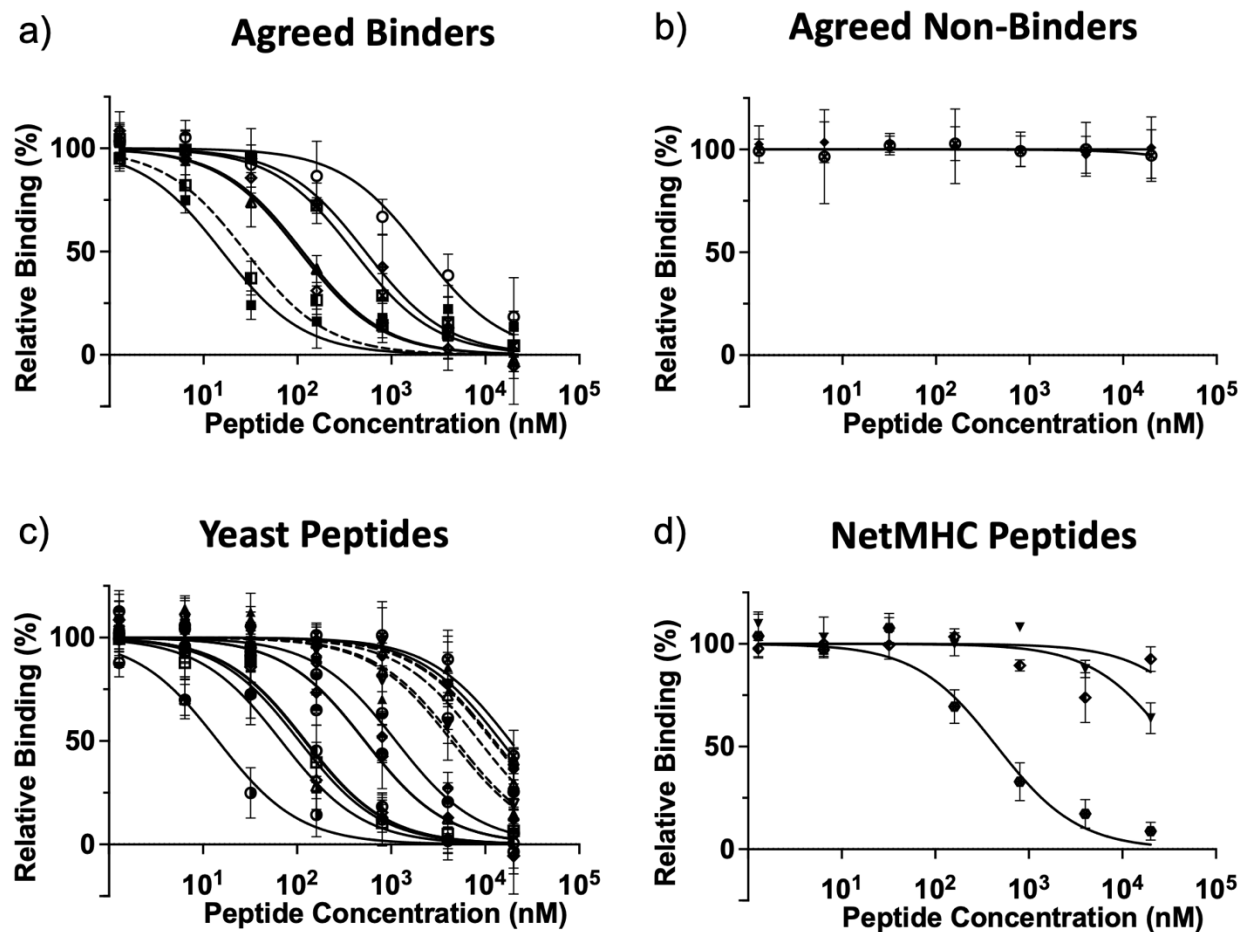

**Figure 4 – figure supplement 2. Titration curves for peptides tested via fluorescence polarization for binding to HLA-DR401, by category.** a) Agreed binder peptides which are predicted to bind by NetMHCIpan4.0 and enriched in yeast display experiments. Dashed line is the positive control HA peptide. b) Agreed non-binder peptides which did not enrich in yeast display experiments and were not predicted to bind by NetMHCIpan4.0. c) Yeast enriched peptides from **Table 2** and **Table 3**. Offset variants from **Table 3** are dashed lines. d) NetMHCIpan4.0 predicted peptides which are not enriched in the yeast display library. Source data are provided as a **Source Data** file.
