# Supplementary material for: A high-throughput yeast display approach to profile pathogen proteomes for MHC-II binding
Source: eLife journal article supplement (doi:10.7554/elife.78589), 2022-07-04
Supplement: supp [file elife_poa_e78589_Figure_4_figure_supplement_3.pdf › elife_poa_e78589_Figure_4_figure_supplement_3.pdf]

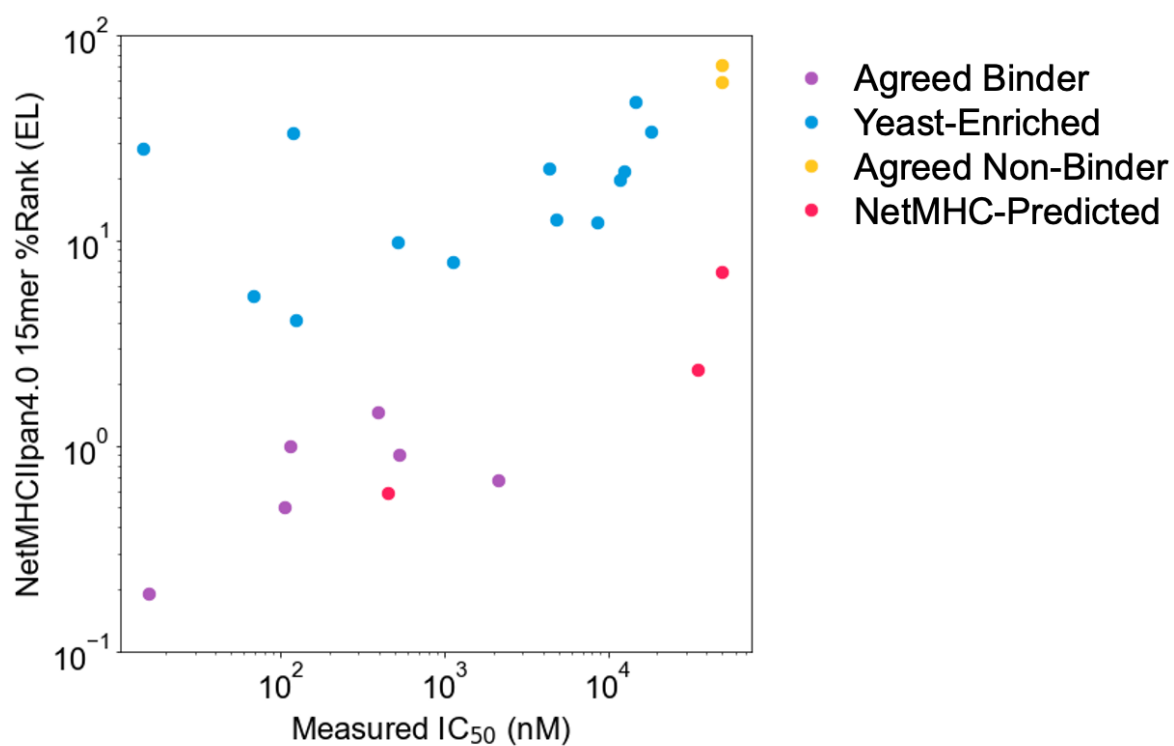

**Figure 4 – figure supplement 3. Comparing measured IC<sub>50</sub> values and prediction.** Relationship between measured IC<sub>50</sub> values and NetMHCIIpan4.0 predicted ranks in Eluted Ligand mode (EL) on unflanked (native) 15mer sequences. Data points are colored by label, and IC<sub>50</sub> values ≥50 μM are set to 50 μM.
