# Supplementary material for: A high-throughput yeast display approach to profile pathogen proteomes for MHC-II binding
Source: eLife. 2022 Jul 4;11:e78589. doi: 10.7554/eLife.78589 (PMC9292997; doi:10.7554/eLife.78589)
Supplement: Supplementary file 1. — (a) Peptide count data from deep sequencing of the SARS-CoV and SARS-CoV-2 libraries. (b) Inferred binding registers of enriched peptides from the SARS-CoV and SARS-CoV-2 libraries. (c) Peptide count data from deep sequencing of the dengue libraries. (d) Primer sequences utilized for generation and deep sequencing of yeast display libraries. [file elife-78589-supp1.xlsx]

## Sheet: 1A-SARS-CoV-2+SARS-CoV
name	dna	doped_match	aa	count_ doped-401 R0 (doped)	count_ doped-402 R0 (doped)	count_ doped-404 R0 (doped)	count_ doped-401 post-R1	count_ doped-402 post-R1	count_ doped-404 post-R1	count_ doped-401 post-R2	count_ doped-402 post-R2	count_ doped-404 post-R2	count_ doped-401 post-R3	count_ doped-402 post-R3	count_ doped-404 post-R3	count_ doped-401 post-R4	count_ doped-402 post-R4	count_ doped-404 post-R4	count_ undoped-401 R0 (undoped)	count_ undoped-402 R0 (undoped)	count_ undoped-404 R0 (undoped)	count_ undoped-401 post-R1 - positive	count_ undoped-402 post-R1 - positive	count_ undoped-404 post-R1 - positive	count_ undoped-401 post-R1 - negative	count_ undoped-402 post-R1 - negative	count_ undoped-404 post-R1 - negative	count_ undoped-401 post-R2 - positive	count_ undoped-402 post-R2 - positive	count_ undoped-404 post-R2 - positive	count_ undoped-401 post-R2 - negative	count_ undoped-402 post-R2 - negative	count_ undoped-404 post-R2 - negative	count_ undoped-401 post-R3 - positive	count_ undoped-402 post-R3 - positive	count_ undoped-404 post-R3 - positive	count_ undoped-401 post-R3 - negative	count_ undoped-402 post-R3 - negative	count_ undoped-404 post-R3 - negative
MESLVPGFNEKTHVQ	ATGGAATCACTAGTTCCTGGATTCAATGAAAAGACTCATGTTCAA	0	MESLVPGFNEKTHVQ	0	0	0	3	3	0	3	8	0	1	3	1	0	0	0	16	22	12	25	46	18	10	20	0	12	13	9	24	33	32	3	6	4	24	22	11
ESLVPGFNEKTHVQL	GAGAGTTTAGTGCCTGGTTTCAACGAAAAAACCCATGTTCAGTTA	0	ESLVPGFNEKTHVQL	0	0	0	2	3	0	5	2	0	3	4	0	0	0	0	21	16	9	16	24	28	9	21	1	9	3	8	30	26	59	0	0	0	8	5	12
SLVPGFNEKTHVQLS	TCACTTGTTCCCGGTTTCAACGAAAAGACACACGTACAATTATCT	0	SLVPGFNEKTHVQLS	0	0	0	0	1	2	3	5	12	0	7	3	0	7	0	22	18	13	18	31	22	8	21	0	7	10	11	19	25	53	3	2	3	11	6	20
LVPGFNEKTHVQLSL	TTGGTACCTGGTTTCAACGAGAAAACACATGTTCAATTATCTTTG	0	LVPGFNEKTHVQLSL	1	0	0	1	0	6	0	0	11	1	0	15	0	0	7	22	19	25	8	25	3	6	8	0	2	2	0	16	25	7	0	0	0	7	7	0
VPGFNEKTHVQLSLP	GTTCCAGGCTTTAACGAGAAGACCCATGTTCAATTATCTCTGCCG	0	VPGFNEKTHVQLSLP	0	0	0	0	25	1	0	7	0	0	2	0	0	0	0	5	11	4	4	10	5	3	11	0	0	0	1	2	4	9	0	0	0	0	0	0
PGFNEKTHVQLSLPV	CCAGGATTTAATGAAAAAACTCATGTGCAATTGAGTCTACCCGTA	0	PGFNEKTHVQLSLPV	0	0	0	0	3	20	0	2	21	0	1	13	0	0	1	13	14	11	11	12	15	8	8	1	2	2	3	15	11	16	0	0	0	0	2	4
GFNEKTHVQLSLPVL	GGCTTTAATGAAAAAACACATGTACAACTTAGTCTACCAGTTCTC	0	GFNEKTHVQLSLPVL	0	0	0	0	6	3	0	4	13	0	0	5	0	1	1	18	24	15	24	49	39	8	21	0	3	6	24	16	35	74	3	2	6	7	11	26
FNEKTHVQLSLPVLQ	TTCAACGAGAAGACTCATGTTCAGCTGTCTTTGCCAGTTTTGCAG	0	FNEKTHVQLSLPVLQ	1	0	0	1	4	10	3	4	24	1	5	15	0	0	2	31	23	18	28	69	73	11	10	0	9	15	49	26	50	136	3	9	31	17	25	78
NEKTHVQLSLPVLQV	AATGAGAAAACTCATGTCCAATTGTCATTGCCTGTTCTGCAAGTT	0	NEKTHVQLSLPVLQV	0	0	1	7	13	22	6	3	21	6	3	25	2	0	2	24	33	19	25	78	54	13	28	1	9	12	27	28	50	105	6	6	13	26	22	55
EKTHVQLSLPVLQVR	GAAAAGACGCACGTGCAACTTTCATTACCGGTTCTGCAAGTTAGA	0	EKTHVQLSLPVLQVR	0	0	0	1	0	11	3	0	14	3	0	9	0	0	1	12	19	5	11	50	29	7	15	0	6	15	13	10	29	25	0	2	7	6	19	20
KTHVQLSLPVLQVRD	AAAACCCATGTACAATTGTCATTGCCCGTTTTACAAGTCAGGGAC	0	KTHVQLSLPVLQVRD	0	0	0	1	1	4	1	0	14	4	0	14	2	2	2	26	23	16	10	61	34	8	23	2	9	11	21	20	37	78	4	4	21	5	8	37
THVQLSLPVLQVRDV	ACACATGTTCAACTCTCTTTACCCGTTCTGCAGGTCCGAGATGTG	0	THVQLSLPVLQVRDV	0	0	1	1	20	24	5	31	66	6	39	81	3	37	121	26	27	39	36	71	65	10	22	0	13	44	68	31	35	40	5	57	97	26	49	32
HVQLSLPVLQVRDVL	CACGTGCAATTATCCCTACCAGTACTACAAGTTAGAGACGTGTTG	0	HVQLSLPVLQVRDVL	0	0	1	5	72	35	11	174	121	5	246	143	2	196	214	31	24	29	41	186	81	11	27	1	18	183	111	45	55	42	5	209	183	26	99	46
VQLSLPVLQVRDVLV	GTACAGCTGTCTTTGCCCGTATTGCAGGTGCGTGATGTGTTAGTC	0	VQLSLPVLQVRDVLV	0	0	0	0	21	18	0	62	44	1	73	50	1	61	31	15	22	21	23	130	68	13	11	0	1	101	56	14	41	102	1	104	28	4	54	38
QLSLPVLQVRDVLVR	CAGCTATCCCTTCCCGTCCTGCAAGTCAGAGATGTCTTAGTAAGG	0	QLSLPVLQVRDVLVR	0	0	0	1	67	18	5	149	48	4	235	53	3	417	62	17	25	32	14	174	41	8	14	0	10	220	49	22	37	44	2	305	66	8	84	33
LSLPVLQVRDVLVRG	CTGTCGTTGCCAGTGTTACAAGTGCGTGACGTTTTGGTTCGTGGT	0	LSLPVLQVRDVLVRG	0	0	0	2	112	29	0	219	104	1	506	121	5	904	146	18	31	41	29	226	124	14	25	0	6	259	139	24	54	108	6	467	134	12	81	83
SLPVLQVRDVLVRGF	TCTCTTCCCGTGTTACAAGTAAGGGATGTACTTGTCAGGGGGTTC	0	SLPVLQVRDVLVRGF	0	0	0	0	38	24	1	108	75	0	198	67	0	228	76	14	22	22	10	97	53	7	13	0	1	89	41	18	22	34	2	131	39	2	49	25
LPVLQVRDVLVRGFG	TTACCAGTCCTCCAAGTTAGAGATGTGCTAGTCAGAGGCTTTGGA	0	LPVLQVRDVLVRGFG	1	0	0	2	17	23	9	54	46	15	74	57	5	38	53	9	21	25	15	87	61	11	13	2	5	88	65	14	35	40	3	138	64	6	60	45
PVLQVRDVLVRGFGD	CCGGTATTACAGGTACGTGATGTCTTAGTAAGGGGTTTCGGTGAT	0	PVLQVRDVLVRGFGD	0	0	0	0	0	2	0	0	3	0	0	4	0	0	0	17	21	22	4	10	12	11	16	0	0	0	13	3	7	13	2	0	12	2	0	10
VLQVRDVLVRGFGDS	GTGCTTCAAGTGCGCGATGTTTTGGTCAGGGGATTTGGTGATTCT	0	VLQVRDVLVRGFGDS	0	0	0	0	0	13	0	0	13	0	0	1	0	0	0	12	18	13	2	21	8	4	9	0	0	4	0	2	10	11	1	1	0	0	1	0
LQVRDVLVRGFGDSV	TTACAGGTTAGAGATGTTTTAGTTAGGGGTTTTGGCGACTCGGTC	0	LQVRDVLVRGFGDSV	0	0	0	0	2	9	0	1	17	0	1	20	0	2	37	1	5	12	2	22	11	0	1	1	0	18	16	6	6	5	0	20	19	0	12	12
QVRDVLVRGFGDSVE	CAAGTGAGAGATGTTTTAGTTAGAGGATTTGGCGATAGTGTTGAA	0	QVRDVLVRGFGDSVE	0	0	0	1	10	0	0	16	0	0	5	0	0	3	0	17	25	26	10	15	26	18	36	3	1	0	16	16	15	66	1	0	5	3	1	13
VRDVLVRGFGDSVEE	GTCAGAGACGTTTTAGTAAGAGGATTCGGCGATTCAGTCGAAGAA	0	VRDVLVRGFGDSVEE	0	0	0	0	0	0	0	0	0	0	0	0	0	0	0	3	13	5	3	0	3	8	12	0	0	0	0	1	0	5	0	0	0	0	0	0
RDVLVRGFGDSVEEV	AGAGACGTGTTGGTAAGAGGTTTTGGTGATTCTGTGGAAGAGGTC	0	RDVLVRGFGDSVEEV	0	0	0	0	10	11	0	8	19	0	1	8	2	0	1	18	36	34	6	12	34	12	26	1	3	3	12	16	10	63	0	1	1	0	4	15
DVLVRGFGDSVEEVL	GATGTACTGGTGAGAGGATTTGGTGACTCTGTGGAAGAAGTCTTG	0	DVLVRGFGDSVEEVL	0	0	0	2	18	8	5	12	15	0	1	4	0	0	1	16	29	27	14	11	23	21	23	3	2	4	14	13	11	48	0	1	13	4	2	8
VLVRGFGDSVEEVLS	GTATTAGTTCGCGGTTTCGGTGATTCCGTTGAAGAAGTATTATCA	0	VLVRGFGDSVEEVLS	0	0	0	5	0	0	4	0	3	1	0	2	0	0	0	15	23	15	13	5	6	14	13	0	2	0	2	13	6	26	0	0	0	0	0	3
LVRGFGDSVEEVLSE	TTAGTCAGAGGTTTTGGTGATTCTGTCGAAGAAGTGCTTTCGGAA	0	LVRGFGDSVEEVLSE	0	0	0	0	0	23	0	0	30	0	0	29	0	0	11	18	30	27	12	11	7	18	18	1	2	0	0	10	3	10	0	1	0	0	0	4
VRGFGDSVEEVLSEA	GTACGCGGCTTTGGGGACTCAGTCGAGGAGGTGCTATCTGAGGCC	0	VRGFGDSVEEVLSEA	0	0	0	0	0	0	0	0	0	0	0	1	0	0	0	7	6	10	5	6	2	4	10	0	3	0	1	6	5	3	0	1	0	0	1	0
RGFGDSVEEVLSEAR	AGGGGTTTTGGGGATTCTGTAGAAGAAGTACTTTCTGAAGCGCGT	0	RGFGDSVEEVLSEAR	0	0	0	0	0	0	0	0	2	0	0	1	0	0	0	13	19	19	8	8	14	13	17	0	3	0	2	12	10	37	2	0	0	3	2	3
GFGDSVEEVLSEARQ	GGATTTGGTGACTCTGTTGAAGAAGTCTTGTCAGAGGCACGCCAG	0	GFGDSVEEVLSEARQ	0	0	0	5	0	3	0	0	3	0	0	2	0	0	1	6	13	9	3	2	0	11	8	0	3	0	0	11	7	0	0	0	0	1	0	0
FGDSVEEVLSEARQH	TTTGGGGATTCTGTAGAGGAGGTATTATCTGAAGCTAGGCAACAT	0	FGDSVEEVLSEARQH	0	0	0	7	2	7	3	0	4	0	0	1	0	0	0	14	19	12	13	18	11	7	16	0	1	1	4	13	5	20	3	0	0	6	0	2
GDSVEEVLSEARQHL	GGTGATTCTGTTGAGGAAGTTTTGAGCGAAGCAAGGCAACATCTC	0	GDSVEEVLSEARQHL	0	0	0	0	0	0	0	0	0	0	0	1	0	0	0	23	34	28	13	7	0	11	28	2	4	0	0	28	10	0	3	0	0	9	0	0
DSVEEVLSEARQHLK	GACTCAGTTGAAGAAGTTCTAAGCGAAGCAAGACAACACTTAAAA	0	DSVEEVLSEARQHLK	0	0	0	3	0	3	3	0	6	2	1	0	2	0	0	18	24	22	3	8	2	17	23	0	1	0	1	3	2	10	1	0	1	0	2	1
SVEEVLSEARQHLKD	TCCGTAGAAGAAGTTTTGTCTGAAGCCCGTCAACATCTTAAAGAT	0	SVEEVLSEARQHLKD	0	0	0	0	0	0	0	0	0	0	0	0	0	0	0	5	6	6	4	1	0	5	4	0	2	0	0	3	2	1	1	0	0	1	0	0
VEEVLSEARQHLKDG	GTCGAAGAGGTCTTAAGCGAGGCTCGACAACATTTAAAGGACGGC	0	VEEVLSEARQHLKDG	0	0	0	0	0	0	0	0	1	0	0	0	0	0	0	16	16	21	5	0	0	5	16	0	0	0	0	0	1	2	0	0	2	0	0	3
EEVLSEARQHLKDGT	GAAGAAGTCTTGAGCGAAGCCCGTCAACATTTAAAGGATGGCACC	0	EEVLSEARQHLKDGT	0	0	0	0	0	0	0	0	0	0	0	0	0	0	0	2	2	1	1	0	0	0	1	0	0	0	0	0	0	0	0	0	0	0	0	0
EVLSEARQHLKDGTC	GAAGTTTTATCTGAAGCAAGGCAACATCTTAAAGACGGGACTTGC	0	EVLSEARQHLKDGTC	0	0	0	4	0	4	12	0	3	9	0	2	2	0	0	14	20	22	26	8	0	7	15	1	16	4	0	26	9	0	7	2	0	31	3	1
VLSEARQHLKDGTCG	GTTCTAAGCGAAGCTAGACAACACCTTAAAGATGGTACTTGTGGC	0	VLSEARQHLKDGTCG	0	0	0	0	0	0	0	0	0	0	0	0	0	0	0	13	26	11	3	8	7	13	20	0	1	0	5	5	4	12	0	0	3	2	0	5
LSEARQHLKDGTCGL	TTATCTGAGGCTCGGCAACATCTAAAAGATGGTACTTGTGGATTG	0	LSEARQHLKDGTCGL	0	0	0	14	13	9	24	13	2	3	4	3	0	1	2	23	37	35	20	10	13	13	22	1	6	2	14	26	4	31	1	0	5	11	3	7
SEARQHLKDGTCGLV	TCCGAGGCGAGACAACACTTAAAAGACGGAACATGTGGACTGGTA	0	SEARQHLKDGTCGLV	0	0	0	8	19	9	3	18	6	7	8	4	1	0	0	20	22	19	36	2	3	5	19	1	11	1	0	20	4	14	5	3	1	17	0	0
EARQHLKDGTCGLVE	GAAGCTAGGCAACACCTTAAGGACGGTACTTGTGGGTTGGTGGAA	0	EARQHLKDGTCGLVE	0	0	1	4	15	2	5	9	3	1	2	0	0	3	0	29	20	20	15	7	8	7	17	0	9	3	3	13	7	10	1	0	2	11	0	0
ARQHLKDGTCGLVEV	GCACGACAACACCTTAAGGACGGTACGTGTGGTTTAGTAGAAGTC	0	ARQHLKDGTCGLVEV	0	0	0	11	6	0	12	9	3	4	22	2	1	26	1	19	28	27	17	25	13	11	21	0	2	2	6	19	13	28	0	1	2	4	4	2
RQHLKDGTCGLVEVE	CGACAACATTTGAAGGACGGGACCTGCGGCCTAGTCGAAGTAGAA	0	RQHLKDGTCGLVEVE	0	0	1	2	1	15	0	1	14	1	0	14	1	0	6	27	35	23	26	17	36	6	17	1	7	2	8	17	7	45	7	1	1	21	5	9
QHLKDGTCGLVEVEK	CAGCATCTAAAGGATGGAACTTGTGGTCTTGTCGAAGTGGAAAAG	0	QHLKDGTCGLVEVEK	0	0	0	18	48	24	46	32	24	20	8	16	1	3	6	33	35	29	31	17	16	6	31	0	17	6	10	36	25	40	6	4	3	22	9	17
HLKDGTCGLVEVEKG	CATTTGAAGGACGGTACATGCGGCCTAGTAGAAGTGGAAAAGGGG	0	HLKDGTCGLVEVEKG	0	0	0	4	0	15	11	1	21	9	0	17	3	0	3	22	35	22	30	7	18	12	25	2	4	0	7	20	4	39	3	0	4	5	4	12
LKDGTCGLVEVEKGV	CTTAAAGATGGTACATGTGGTTTGGTCGAAGTCGAAAAGGGTGTA	0	LKDGTCGLVEVEKGV	0	0	0	10	5	8	35	2	35	33	0	21	15	1	15	26	29	25	46	19	43	9	21	0	40	6	35	43	16	50	28	0	18	57	9	33
KDGTCGLVEVEKGVL	AAGGATGGCACCTGCGGTCTCGTTGAGGTTGAAAAGGGCGTCTTG	0	KDGTCGLVEVEKGVL	0	0	0	7	3	15	40	4	34	48	0	38	20	0	37	24	25	22	58	12	33	3	23	1	60	2	26	31	13	42	36	2	17	59	5	31
DGTCGLVEVEKGVLP	GACGGCACTTGCGGACTCGTTGAGGTAGAGAAAGGAGTGTTGCCA	0	DGTCGLVEVEKGVLP	0	0	0	8	1	8	10	0	44	6	0	40	5	0	18	14	8	24	20	9	20	3	16	0	19	0	21	20	11	51	9	4	7	26	3	24
GTCGLVEVEKGVLPQ	GGTACTTGTGGTTTAGTCGAGGTTGAGAAGGGAGTGTTGCCACAA	0	GTCGLVEVEKGVLPQ	0	0	1	1	0	8	0	0	22	1	0	36	2	0	25	8	10	11	23	7	12	3	4	0	26	3	16	17	6	27	12	4	6	21	2	18
TCGLVEVEKGVLPQL	ACATGTGGTCTTGTCGAGGTCGAGAAAGGAGTTCTTCCCCAATTG	0	TCGLVEVEKGVLPQL	0	0	1	14	3	12	48	18	31	45	4	17	22	2	10	21	33	28	60	18	43	8	26	1	44	2	26	43	13	62	21	3	14	47	9	32
CGLVEVEKGVLPQLE	TGCGGTCTTGTTGAAGTTGAAAAAGGTGTTCTTCCGCAACTCGAA	0	CGLVEVEKGVLPQLE	0	0	0	7	3	11	27	0	7	33	0	3	6	0	4	21	15	20	43	16	34	3	18	0	29	1	15	32	16	48	8	1	8	46	0	18
GLVEVEKGVLPQLEQ	GGTCTTGTTGAGGTTGAAAAAGGTGTTCTTCCCCAGCTAGAACAG	0	GLVEVEKGVLPQLEQ	0	0	0	8	5	0	15	4	0	10	0	0	5	0	1	18	27	22	28	16	22	3	14	1	14	2	11	33	19	49	14	0	5	25	3	10
LVEVEKGVLPQLEQP	TTAGTTGAAGTCGAAAAAGGTGTTCTACCGCAATTAGAACAACCA	0	LVEVEKGVLPQLEQP	0	0	0	3	0	2	6	0	3	0	0	0	0	0	1	17	23	13	37	10	20	4	18	4	10	1	7	20	6	17	5	0	2	13	3	9
VEVEKGVLPQLEQPY	GTCGAAGTAGAGAAGGGGGTGTTACCTCAGTTAGAGCAACCTTAC	0	VEVEKGVLPQLEQPY	0	0	0	0	0	0	0	0	0	0	0	0	0	0	0	17	24	23	15	13	21	8	11	0	0	0	4	7	3	24	0	0	0	4	2	5
EVEKGVLPQLEQPYV	GAAGTTGAAAAGGGCGTATTGCCTCAGCTAGAGCAACCCTATGTG	0	EVEKGVLPQLEQPYV	0	0	0	0	0	0	0	0	0	0	0	0	0	0	0	11	22	15	12	10	1	10	12	0	6	2	1	6	6	18	0	0	0	4	2	3
VEKGVLPQLEQPYVF	GTTGAAAAAGGTGTTCTCCCGCAATTAGAGCAACCTTATGTCTTT	0	VEKGVLPQLEQPYVF	0	0	0	2	0	0	0	0	0	0	0	0	0	0	0	20	25	29	10	11	10	11	19	1	4	0	0	19	10	17	3	1	0	6	3	2
EKGVLPQLEQPYVFI	GAAAAAGGAGTGCTACCTCAGCTTGAACAACCTTATGTTTTTATT	0	EKGVLPQLEQPYVFI	0	0	1	0	0	0	1	0	0	0	0	1	0	0	0	15	22	20	19	17	8	11	23	1	3	5	6	9	8	35	1	0	0	3	3	4
KGVLPQLEQPYVFIK	AAAGGAGTTCTACCTCAACTCGAACAACCCTATGTGTTTATTAAG	0	KGVLPQLEQPYVFIK	0	0	0	0	0	2	0	0	10	0	0	5	0	0	0	9	14	15	5	14	0	10	11	0	3	1	0	5	4	0	0	0	0	0	1	0
GVLPQLEQPYVFIKR	GGTGTCTTGCCTCAACTCGAGCAACCCTATGTCTTTATCAAAAGA	0	GVLPQLEQPYVFIKR	0	0	1	4	0	1	3	0	2	3	0	0	0	0	0	8	21	21	15	16	3	9	13	1	2	5	0	9	11	9	1	1	0	3	4	0
VLPQLEQPYVFIKRS	GTTTTGCCTCAACTAGAACAGCCATATGTCTTCATTAAAAGGTCG	0	VLPQLEQPYVFIKRS	0	0	0	2	5	0	2	5	0	0	1	0	0	0	0	15	23	21	11	21	4	10	20	0	1	7	0	20	12	14	4	5	0	3	3	2
LPQLEQPYVFIKRSD	CTTCCACAACTTGAACAACCTTATGTTTTTATTAAAAGATCAGAT	0	LPQLEQPYVFIKRSD	0	0	1	0	10	3	2	12	4	0	16	3	1	7	0	17	12	7	8	59	18	11	12	0	3	27	5	10	20	23	1	24	3	2	29	7
PQLEQPYVFIKRSDA	CCTCAACTAGAACAGCCCTATGTTTTCATTAAAAGATCCGATGCC	0	PQLEQPYVFIKRSDA	0	0	0	0	5	0	0	12	0	0	16	0	0	5	1	5	6	5	6	8	11	7	8	0	0	10	4	3	6	18	0	7	4	0	11	4
QLEQPYVFIKRSDAR	CAACTAGAACAGCCGTACGTATTTATCAAGCGTTCAGACGCTAGA	0	QLEQPYVFIKRSDAR	0	0	0	2	8	13	1	24	19	4	17	16	0	18	5	32	22	18	28	30	9	9	12	0	7	15	3	29	17	25	4	23	0	12	21	14
LEQPYVFIKRSDART	TTAGAACAGCCTTATGTGTTTATCAAGAGGTCTGATGCTAGGACA	0	LEQPYVFIKRSDART	0	1	0	0	19	12	0	24	23	0	18	7	1	6	5	19	19	28	19	58	2	9	14	2	8	39	4	16	41	15	2	21	0	9	34	5
EQPYVFIKRSDARTA	GAGCAGCCTTACGTTTTTATAAAGCGGTCGGATGCACGCACCGCG	0	EQPYVFIKRSDARTA	0	0	0	0	0	1	0	0	0	0	0	1	0	0	0	4	1	1	0	2	0	0	0	0	0	1	0	1	0	0	0	2	0	0	0	0
QPYVFIKRSDARTAP	CAACCTTATGTTTTCATCAAAAGGTCGGACGCTCGCACTGCTCCT	0	QPYVFIKRSDARTAP	0	0	0	0	0	0	0	0	0	0	0	0	0	0	0	0	0	0	0	0	0	0	0	0	0	0	0	0	0	0	0	0	0	0	0	0
PYVFIKRSDARTAPH	CCATACGTGTTCATTAAGCGGTCTGATGCCCGTACCGCGCCTCAT	0	PYVFIKRSDARTAPH	0	0	0	0	16	7	0	25	6	0	15	2	0	5	1	22	22	20	9	22	1	15	17	0	2	3	1	9	13	6	0	3	0	0	4	0
YVFIKRSDARTAPHG	TACGTCTTTATAAAACGCTCTGATGCTAGGACTGCTCCCCATGGC	0	YVFIKRSDARTAPHG	0	0	0	0	0	1	0	0	1	0	0	0	0	0	0	12	23	17	0	0	1	11	8	1	1	0	0	0	0	3	0	0	0	2	0	0
VFIKRSDARTAPHGH	GTCTTTATTAAAAGGTCTGACGCCCGTACTGCTCCTCACGGACAT	0	VFIKRSDARTAPHGH	0	0	0	0	7	0	0	4	0	0	0	0	0	0	0	15	20	10	1	3	1	10	12	0	0	1	0	3	1	5	0	0	0	0	2	0
FIKRSDARTAPHGHV	TTTATTAAACGCTCAGACGCAAGGACAGCACCTCACGGACATGTA	0	FIKRSDARTAPHGHV	0	0	0	0	0	0	0	0	0	0	0	0	0	0	0	11	20	16	2	3	3	7	12	0	2	0	2	1	2	3	0	0	1	0	0	1
IKRSDARTAPHGHVM	ATTAAACGGAGTGATGCAAGGACTGCACCACATGGTCACGTTATG	0	IKRSDARTAPHGHVM	0	0	0	0	0	0	0	0	0	0	0	0	0	0	0	7	19	14	1	2	6	5	10	0	0	0	1	2	0	23	0	0	0	2	0	2
KRSDARTAPHGHVMV	AAAAGATCTGATGCCAGAACGGCACCACACGGGCATGTAATGGTA	0	KRSDARTAPHGHVMV	0	0	0	0	0	0	0	0	0	0	0	0	0	0	0	9	15	13	4	4	0	6	10	0	1	1	0	2	4	0	0	1	0	0	0	0
RSDARTAPHGHVMVE	AGGAGCGACGCTAGAACTGCACCCCATGGTCATGTTATGGTTGAG	0	RSDARTAPHGHVMVE	0	0	1	1	0	0	0	0	1	0	0	0	0	0	0	19	31	30	20	9	3	15	26	2	1	0	1	12	7	9	0	0	0	2	0	4
SDARTAPHGHVMVEL	TCTGATGCAAGGACCGCACCCCATGGTCACGTCATGGTTGAGTTG	0	SDARTAPHGHVMVEL	0	0	0	0	0	0	0	0	0	0	0	1	0	0	0	14	22	25	10	10	6	15	14	0	2	2	0	10	15	5	0	0	0	0	0	0
DARTAPHGHVMVELV	GATGCCAGGACAGCCCCGCATGGTCATGTTATGGTCGAACTGGTG	0	DARTAPHGHVMVELV	0	0	1	1	12	16	10	4	57	3	3	60	1	1	40	21	28	25	26	13	6	6	17	1	10	1	6	32	11	15	6	1	2	10	0	5
ARTAPHGHVMVELVA	GCAAGGACCGCCCCTCATGGGCACGTGATGGTAGAATTGGTAGCC	0	ARTAPHGHVMVELVA	0	0	0	0	0	22	0	2	65	0	0	73	0	1	60	10	13	9	22	7	26	3	12	1	13	2	24	22	8	20	3	2	28	29	0	16
RTAPHGHVMVELVAE	CGTACAGCTCCACACGGTCATGTCATGGTTGAATTGGTCGCCGAA	0	RTAPHGHVMVELVAE	0	0	0	6	0	18	9	0	76	12	0	70	13	1	61	9	18	18	24	10	18	4	9	0	18	0	20	26	6	19	11	0	20	33	3	18
TAPHGHVMVELVAEL	ACAGCCCCCCATGGACATGTAATGGTCGAGTTGGTTGCTGAACTG	0	TAPHGHVMVELVAEL	0	0	0	2	0	18	6	0	37	9	0	53	0	0	37	16	23	25	36	33	73	7	18	0	16	5	109	25	10	88	4	1	100	25	4	78
APHGHVMVELVAELE	GCACCTCATGGTCATGTAATGGTTGAATTAGTGGCTGAACTGGAA	0	APHGHVMVELVAELE	0	0	0	0	0	5	0	0	4	0	0	5	1	0	3	19	28	26	14	9	17	9	19	2	6	1	2	25	6	33	0	0	1	8	2	9
PHGHVMVELVAELEG	CCTCATGGCCATGTTATGGTTGAATTGGTCGCCGAGTTGGAAGGT	0	PHGHVMVELVAELEG	0	0	0	2	0	1	3	0	0	0	0	0	0	0	0	28	26	26	18	5	1	16	23	2	4	3	2	14	3	1	0	2	0	4	3	0
HGHVMVELVAELEGI	CATGGGCATGTAATGGTTGAATTGGTTGCTGAATTGGAGGGCATA	0	HGHVMVELVAELEGI	0	0	0	4	15	12	3	17	24	5	6	14	1	5	4	17	37	26	21	10	77	12	25	0	5	0	34	33	10	150	4	0	21	21	3	53
GHVMVELVAELEGIQ	GGTCATGTAATGGTTGAATTAGTAGCAGAACTTGAGGGTATTCAA	0	GHVMVELVAELEGIQ	0	0	0	1	0	6	3	0	15	2	0	15	0	0	0	18	23	20	19	5	36	13	18	2	5	1	18	18	11	48	5	0	6	13	0	29
HVMVELVAELEGIQY	CATGTGATGGTTGAATTAGTCGCAGAGTTAGAGGGTATTCAATAC	0	HVMVELVAELEGIQY	0	0	1	9	0	2	18	0	0	5	0	3	2	0	1	17	27	15	39	3	41	7	20	0	18	0	22	32	4	70	3	0	5	17	1	18
VMVELVAELEGIQYG	GTTATGGTTGAATTAGTTGCTGAACTGGAAGGGATACAATACGGT	0	VMVELVAELEGIQYG	0	0	0	2	0	11	6	1	10	2	0	4	5	0	1	24	24	16	29	6	19	7	15	2	16	1	10	29	7	22	4	2	3	27	1	6
MVELVAELEGIQYGR	ATGGTGGAACTAGTTGCAGAACTTGAGGGTATTCAATACGGCCGT	0	MVELVAELEGIQYGR	0	0	0	8	5	12	18	10	36	7	0	35	2	0	23	14	13	13	38	26	80	8	17	0	20	6	67	26	17	102	5	1	78	24	3	72
VELVAELEGIQYGRS	GTTGAATTGGTTGCTGAATTAGAAGGAATACAATATGGGCGAAGT	0	VELVAELEGIQYGRS	1	1	0	8	6	5	13	7	8	9	3	6	1	4	1	34	30	26	45	33	31	8	17	0	18	3	16	37	20	80	2	0	6	29	10	26
ELVAELEGIQYGRSG	GAACTCGTGGCCGAATTGGAAGGTATTCAGTATGGAAGAAGTGGG	0	ELVAELEGIQYGRSG	0	0	1	18	6	0	45	8	0	44	3	0	24	0	0	19	31	24	54	55	27	3	23	1	49	9	14	28	37	94	21	5	6	71	13	24
LVAELEGIQYGRSGE	CTGGTTGCAGAACTTGAAGGCATTCAGTATGGCAGATCAGGCGAA	0	LVAELEGIQYGRSGE	0	0	0	1	4	3	3	4	0	1	0	0	0	1	0	16	27	19	16	9	13	8	10	1	2	3	8	17	6	28	1	1	4	4	5	3
VAELEGIQYGRSGET	GTTGCTGAACTAGAGGGGATCCAGTATGGTAGATCGGGCGAGACT	0	VAELEGIQYGRSGET	0	0	0	2	0	3	0	0	7	0	0	2	0	0	0	6	10	7	2	7	11	2	15	0	1	1	6	3	6	30	0	0	2	0	2	9
AELEGIQYGRSGETL	GCTGAACTAGAAGGTATCCAATATGGCCGTTCAGGCGAAACGTTG	0	AELEGIQYGRSGETL	0	0	0	1	6	3	5	8	9	5	2	4	1	1	1	32	33	41	35	35	32	17	19	1	8	7	5	24	46	62	3	0	0	8	1	11
ELEGIQYGRSGETLG	GAGTTAGAAGGTATTCAGTACGGTAGAAGCGGAGAAACACTTGGT	0	ELEGIQYGRSGETLG	0	0	0	0	0	3	0	0	2	0	0	0	0	0	0	3	5	10	10	3	3	3	8	0	3	1	1	5	1	13	0	0	0	1	1	2
LEGIQYGRSGETLGV	TTAGAAGGTATCCAATATGGTAGATCCGGTGAAACTTTAGGTGTC	0	LEGIQYGRSGETLGV	0	0	1	10	3	0	17	1	0	16	0	0	3	0	0	11	12	12	19	9	14	0	7	0	22	3	3	18	4	31	5	0	0	20	3	8
EGIQYGRSGETLGVL	GAAGGAATCCAGTATGGTCGTTCAGGAGAAACTCTGGGAGTGTTA	0	EGIQYGRSGETLGVL	0	0	0	6	6	1	37	3	0	23	2	0	3	0	0	22	28	33	55	24	19	8	23	0	19	3	4	44	24	39	7	1	1	37	8	5
GIQYGRSGETLGVLV	GGAATTCAATACGGCAGATCAGGTGAGACTTTGGGTGTATTAGTA	0	GIQYGRSGETLGVLV	0	0	0	6	0	3	9	0	0	3	0	1	0	0	0	13	26	22	41	7	15	9	16	0	21	2	2	22	13	20	7	0	0	20	5	5
IQYGRSGETLGVLVP	ATCCAATACGGTCGTTCTGGGGAGACCTTAGGTGTTCTTGTTCCG	0	IQYGRSGETLGVLVP	0	0	0	3	0	1	6	0	0	0	0	0	0	0	0	15	12	12	20	8	6	9	14	0	4	1	1	15	8	16	2	0	1	4	0	3
QYGRSGETLGVLVPH	CAATATGGTAGAAGTGGAGAAACATTGGGTGTCTTGGTTCCTCAC	0	QYGRSGETLGVLVPH	0	0	0	20	5	6	46	6	15	35	1	6	13	0	3	16	23	13	37	38	19	6	14	3	44	7	3	25	24	34	14	5	4	43	6	10
YGRSGETLGVLVPHV	TACGGGAGATCTGGTGAAACACTCGGTGTATTAGTTCCACACGTT	0	YGRSGETLGVLVPHV	0	0	1	0	6	3	0	9	11	0	8	2	0	1	1	19	18	22	11	55	40	9	16	0	1	16	17	10	41	63	0	7	6	0	16	26
GRSGETLGVLVPHVG	GGACGTAGCGGTGAAACCTTAGGAGTACTAGTACCACATGTTGGG	0	GRSGETLGVLVPHVG	0	0	0	1	0	6	3	0	12	1	0	13	0	0	5	22	29	23	24	77	67	10	12	0	3	21	41	17	55	105	0	20	14	5	19	55
RSGETLGVLVPHVGE	CGCTCTGGCGAAACTTTAGGTGTGCTGGTGCCACATGTCGGCGAA	0	RSGETLGVLVPHVGE	0	0	0	1	9	9	3	9	18	0	8	12	0	9	2	14	20	12	15	74	39	9	12	0	3	32	30	9	45	61	0	25	24	4	36	23
SGETLGVLVPHVGEI	AGTGGAGAAACTTTAGGTGTATTGGTCCCTCACGTTGGAGAGATA	0	SGETLGVLVPHVGEI	0	0	0	0	7	16	0	14	29	0	25	27	0	10	13	25	31	19	43	96	85	7	16	0	8	85	73	33	41	156	4	98	17	21	70	77
GETLGVLVPHVGEIP	GGTGAAACTTTAGGGGTGTTGGTGCCACATGTTGGTGAAATTCCA	0	GETLGVLVPHVGEIP	0	0	0	0	0	20	0	0	43	0	0	35	0	1	9	9	19	13	12	98	48	8	14	1	2	38	30	9	36	95	0	25	18	2	55	41
ETLGVLVPHVGEIPV	GAGACTTTAGGTGTTCTAGTCCCACATGTTGGCGAGATTCCTGTT	0	ETLGVLVPHVGEIPV	0	0	0	1	34	29	2	44	46	0	42	30	0	19	4	21	20	25	15	56	59	11	21	3	6	25	26	28	37	97	1	14	12	3	20	41
TLGVLVPHVGEIPVA	ACTTTGGGTGTTTTGGTTCCACATGTTGGTGAAATTCCGGTTGCC	0	TLGVLVPHVGEIPVA	0	0	0	0	1	15	0	2	61	0	1	48	1	2	36	7	11	9	3	24	20	2	3	0	0	6	9	2	13	26	0	3	15	0	16	21
LGVLVPHVGEIPVAY	CTTGGAGTCCTCGTTCCTCATGTTGGGGAAATTCCAGTTGCATAT	0	LGVLVPHVGEIPVAY	0	0	0	4	43	34	1	56	48	1	30	21	1	10	5	25	32	17	13	69	54	11	19	0	4	29	19	21	27	54	3	10	11	3	12	28
GVLVPHVGEIPVAYR	GGTGTTTTGGTCCCTCACGTGGGCGAAATCCCAGTTGCTTACAGA	0	GVLVPHVGEIPVAYR	0	0	0	9	19	14	13	36	24	5	50	18	3	49	4	21	17	16	26	61	57	12	17	0	4	52	26	22	28	91	0	40	17	14	45	57
VLVPHVGEIPVAYRK	GTCTTAGTGCCACACGTAGGCGAGATTCCTGTAGCATATAGAAAG	0	VLVPHVGEIPVAYRK	0	0	0	0	12	8	0	4	9	0	3	9	0	0	7	22	25	22	17	17	10	9	22	1	6	3	4	11	9	26	2	3	0	11	7	4
LVPHVGEIPVAYRKV	TTGGTGCCCCACGTCGGTGAGATTCCAGTTGCATATAGAAAGGTC	0	LVPHVGEIPVAYRKV	0	0	0	0	0	0	0	0	0	0	0	0	0	0	0	10	20	21	11	13	4	14	10	1	8	0	0	10	14	10	3	0	0	4	2	1
VPHVGEIPVAYRKVL	GTTCCTCACGTCGGCGAAATACCCGTCGCTTACAGAAAAGTTTTG	0	VPHVGEIPVAYRKVL	0	0	0	0	34	4	0	97	2	0	102	2	0	85	2	14	32	16	11	95	10	12	16	0	4	58	6	14	31	16	0	74	6	10	73	27
PHVGEIPVAYRKVLL	CCTCACGTTGGTGAAATACCCGTTGCTTACAGAAAAGTGCTTTTA	0	PHVGEIPVAYRKVLL	0	0	0	1	39	4	7	78	7	3	82	6	3	63	2	17	32	14	4	76	24	15	19	0	2	50	9	8	17	41	0	61	9	2	65	15
HVGEIPVAYRKVLLR	CACGTTGGTGAAATTCCCGTTGCATATAGAAAAGTTTTACTTAGA	0	HVGEIPVAYRKVLLR	0	0	0	0	7	2	0	2	1	0	1	1	0	0	1	10	18	9	15	14	14	11	19	1	1	1	15	2	10	20	0	1	6	3	4	9
VGEIPVAYRKVLLRK	GTAGGTGAGATACCCGTGGCATACAGGAAAGTTTTGTTAAGAAAA	0	VGEIPVAYRKVLLRK	0	0	0	0	3	1	0	11	2	0	1	0	0	0	0	22	27	14	5	19	13	10	20	1	1	2	8	4	8	24	0	6	6	3	13	3
GEIPVAYRKVLLRKN	GGAGAAATTCCCGTCGCCTACAGAAAGGTGCTCTTGCGAAAGAAC	0	GEIPVAYRKVLLRKN	0	0	0	2	6	0	1	7	1	0	1	0	0	2	0	28	25	17	5	65	8	13	11	0	0	28	2	5	34	13	1	25	3	2	28	2
EIPVAYRKVLLRKNG	GAAATCCCAGTTGCCTACAGAAAAGTTTTGTTGAGAAAGAATGGC	0	EIPVAYRKVLLRKNG	0	0	0	1	0	0	0	0	0	0	0	0	0	0	0	14	18	15	2	25	0	12	10	0	0	18	0	5	17	1	0	7	1	0	21	0
IPVAYRKVLLRKNGN	ATACCTGTAGCATATCGGAAGGTCCTATTACGTAAAAATGGCAAT	0	IPVAYRKVLLRKNGN	0	0	0	0	0	0	0	0	0	0	0	1	0	0	0	21	25	25	2	6	2	17	23	1	3	0	1	2	1	6	0	0	1	1	0	1
PVAYRKVLLRKNGNK	CCTGTGGCTTACCGCAAAGTGTTATTGAGAAAAAATGGTAATAAA	0	PVAYRKVLLRKNGNK	0	0	0	0	0	0	0	0	0	0	0	0	0	0	0	13	19	18	0	2	2	13	16	0	0	1	4	1	1	0	0	0	2	0	1	1
VAYRKVLLRKNGNKG	GTTGCCTACAGAAAAGTGTTACTTAGAAAAAATGGTAACAAAGGG	0	VAYRKVLLRKNGNKG	0	0	0	2	0	0	0	0	0	3	0	0	0	0	0	13	13	3	2	0	0	11	12	2	2	0	0	2	0	0	1	0	0	4	0	0
AYRKVLLRKNGNKGA	GCTTATAGAAAGGTGTTACTAAGGAAAAACGGGAATAAAGGTGCC	0	AYRKVLLRKNGNKGA	0	0	0	0	0	0	0	0	0	0	0	0	1	0	0	6	7	5	2	0	0	2	10	0	0	0	4	0	0	2	1	0	0	0	0	5
YRKVLLRKNGNKGAG	TACAGGAAAGTTCTCCTTCGTAAAAATGGTAATAAAGGAGCAGGT	0	YRKVLLRKNGNKGAG	0	0	0	0	0	6	0	0	7	0	0	2	0	0	7	22	29	16	2	5	1	7	23	0	0	0	7	3	2	5	0	0	5	0	0	2
RKVLLRKNGNKGAGG	CGTAAAGTTTTGTTACGTAAAAACGGCAACAAGGGTGCAGGTGGC	0	RKVLLRKNGNKGAGG	0	0	0	0	0	3	0	0	8	0	0	3	0	0	2	15	24	10	3	4	1	6	11	0	4	4	2	2	0	0	0	2	0	1	1	1
KVLLRKNGNKGAGGH	AAGGTCTTATTAAGAAAGAATGGCAATAAAGGAGCGGGTGGTCAT	0	KVLLRKNGNKGAGGH	0	0	0	1	0	1	3	0	0	0	0	0	0	0	1	15	21	19	0	9	1	6	10	1	0	2	0	1	5	3	0	3	0	1	2	0
VLLRKNGNKGAGGHS	GTCCTTTTGAGAAAGAATGGCAATAAGGGGGCGGGCGGCCATTCT	0	VLLRKNGNKGAGGHS	0	0	1	0	0	0	0	0	3	0	0	0	0	0	0	9	8	7	2	0	0	3	8	0	0	0	0	3	1	0	0	0	0	1	0	0
LLRKNGNKGAGGHSY	CTGTTGCGCAAAAATGGAAATAAGGGTGCGGGGGGGCACTCTTAT	0	LLRKNGNKGAGGHSY	0	0	0	0	0	0	0	0	0	0	1	1	0	0	0	9	15	11	5	11	0	6	12	1	2	1	0	1	9	0	1	0	0	1	0	0
LRKNGNKGAGGHSYG	TTGAGAAAGAACGGTAATAAGGGTGCTGGCGGTCATAGTTATGGG	0	LRKNGNKGAGGHSYG	0	0	0	0	0	2	0	0	3	0	0	1	0	0	2	26	20	17	4	16	2	22	13	2	0	1	0	4	17	4	1	1	0	2	2	0
RKNGNKGAGGHSYGA	AGAAAGAATGGTAACAAAGGCGCGGGTGGACATTCCTACGGCGCT	0	RKNGNKGAGGHSYGA	0	0	0	1	2	5	2	0	1	3	0	0	1	0	0	9	38	13	3	11	4	13	25	0	1	1	0	6	0	11	0	0	0	1	0	4
KNGNKGAGGHSYGAD	AAGAATGGAAACAAAGGCGCGGGTGGTCATAGTTATGGTGCGGAT	0	KNGNKGAGGHSYGAD	0	0	0	0	0	4	0	0	0	0	0	1	0	0	1	15	14	13	9	3	0	6	13	0	4	0	0	7	1	0	0	0	0	0	0	0
NGNKGAGGHSYGADL	AATGGTAATAAAGGCGCAGGAGGACATTCTTACGGTGCTGACTTA	0	NGNKGAGGHSYGADL	0	0	0	1	7	0	0	5	0	0	1	0	0	0	0	32	26	16	24	11	5	14	15	2	4	2	0	18	6	11	0	1	0	2	1	2
GNKGAGGHSYGADLK	GGTAATAAAGGTGCGGGGGGACATTCTTACGGAGCGGACTTAAAG	0	GNKGAGGHSYGADLK	0	0	0	4	0	4	7	0	0	6	2	0	1	2	0	20	31	17	14	6	7	11	16	0	1	0	0	9	1	5	4	0	0	1	0	1
NKGAGGHSYGADLKS	AATAAAGGTGCGGGAGGTCATAGCTACGGTGCTGATCTGAAATCA	0	NKGAGGHSYGADLKS	0	0	0	2	0	0	1	0	0	0	0	0	0	0	0	25	30	38	15	7	9	11	27	3	5	1	1	24	7	17	1	1	0	1	1	0
KGAGGHSYGADLKSF	AAAGGAGCTGGGGGACATTCCTACGGTGCTGATCTTAAATCCTTT	0	KGAGGHSYGADLKSF	0	0	0	0	0	3	1	0	0	0	0	0	0	0	0	12	28	14	6	10	7	8	21	2	1	0	2	17	12	19	1	0	0	2	0	6
GAGGHSYGADLKSFD	GGTGCTGGTGGTCATTCCTACGGTGCCGACCTTAAAAGTTTCGAT	0	GAGGHSYGADLKSFD	0	0	0	0	0	0	6	0	0	5	0	0	0	0	0	23	24	18	26	9	6	10	13	0	2	0	2	10	12	11	1	1	4	1	0	1
AGGHSYGADLKSFDL	GCAGGAGGGCACTCATATGGTGCTGACCTAAAAAGTTTTGATTTG	0	AGGHSYGADLKSFDL	0	0	2	0	0	0	0	0	0	0	0	0	0	0	0	21	31	20	14	3	12	8	28	2	0	0	4	8	4	18	1	0	0	0	0	4
GGHSYGADLKSFDLG	GGCGGTCACTCTTATGGAGCAGATTTAAAATCTTTCGACTTGGGG	0	GGHSYGADLKSFDLG	0	0	0	0	0	2	1	0	1	0	0	0	1	0	0	22	20	16	7	10	19	6	11	2	2	1	2	6	7	31	0	0	0	0	2	6
GHSYGADLKSFDLGD	GGACACTCCTACGGTGCAGATCTGAAGTCATTCGATTTAGGTGAC	0	GHSYGADLKSFDLGD	0	0	0	0	0	5	0	0	1	0	0	0	0	0	0	14	21	17	10	3	2	9	14	0	4	0	1	2	0	3	0	1	1	1	0	5
HSYGADLKSFDLGDE	CATTCTTACGGTGCAGATTTAAAGAGCTTCGATTTAGGTGACGAG	0	HSYGADLKSFDLGDE	0	0	0	0	0	0	2	0	0	0	0	0	0	0	0	20	21	29	13	12	2	15	16	0	1	0	0	8	5	5	0	0	0	2	2	0
SYGADLKSFDLGDEL	TCTTACGGGGCCGACCTCAAGTCCTTTGACTTGGGTGATGAATTG	0	SYGADLKSFDLGDEL	0	0	0	0	0	6	1	0	14	0	0	5	1	0	3	10	9	11	7	7	2	0	8	1	2	0	1	4	1	13	0	0	0	0	0	3
YGADLKSFDLGDELG	TATGGAGCTGATCTTAAATCTTTTGACTTAGGTGATGAGTTGGGT	0	YGADLKSFDLGDELG	0	0	0	0	0	0	4	0	0	4	0	0	8	0	0	12	17	23	5	17	8	13	16	0	0	2	1	9	5	18	0	0	3	2	2	14
GADLKSFDLGDELGT	GGCGCCGATCTAAAGTCTTTCGATTTAGGAGATGAATTGGGCACT	0	GADLKSFDLGDELGT	0	0	0	0	0	0	0	0	0	0	0	0	0	0	0	7	11	6	7	4	1	10	9	0	0	0	1	6	2	0	2	0	0	1	0	1
ADLKSFDLGDELGTD	GCCGATCTAAAGTCCTTTGATCTAGGTGATGAACTGGGAACAGAT	0	ADLKSFDLGDELGTD	0	0	0	0	0	2	0	0	0	0	0	0	0	0	0	19	17	16	11	2	4	8	16	1	1	2	0	8	7	16	0	2	0	0	0	0
DLKSFDLGDELGTDP	GACCTAAAATCCTTCGATTTGGGAGATGAACTAGGTACAGATCCT	0	DLKSFDLGDELGTDP	0	0	0	0	0	1	0	0	6	0	0	2	0	0	0	12	14	8	5	9	15	10	11	0	1	0	3	6	5	31	0	0	0	0	1	5
LKSFDLGDELGTDPY	TTGAAGTCCTTTGACTTGGGTGACGAACTGGGCACCGATCCCTAT	0	LKSFDLGDELGTDPY	0	0	0	0	0	0	0	0	0	0	0	0	0	0	0	1	1	3	6	1	3	7	4	0	0	0	0	6	1	4	0	0	0	0	0	1
KSFDLGDELGTDPYE	AAAAGTTTTGACTTAGGAGACGAACTAGGTACTGATCCTTACGAG	0	KSFDLGDELGTDPYE	0	0	0	0	0	0	0	0	0	0	0	0	0	0	0	8	15	11	5	14	0	12	12	0	3	0	0	7	7	0	1	1	0	2	2	1
SFDLGDELGTDPYED	TCCTTTGACTTGGGAGATGAATTAGGTACCGATCCATACGAAGAC	0	SFDLGDELGTDPYED	0	0	0	0	0	0	0	0	0	0	0	0	0	0	0	6	5	2	3	4	0	2	1	0	1	0	0	2	2	0	0	0	0	0	0	0
FDLGDELGTDPYEDF	TTTGATCTTGGAGATGAGCTAGGAACGGATCCTTATGAAGACTTT	0	FDLGDELGTDPYEDF	0	0	0	0	0	0	0	0	0	0	0	0	0	0	0	5	10	5	1	0	0	0	7	0	0	0	0	3	0	0	0	0	0	0	0	0
DLGDELGTDPYEDFQ	GATCTTGGTGACGAATTGGGCACTGATCCTTACGAAGATTTCCAA	0	DLGDELGTDPYEDFQ	0	0	0	0	0	0	0	0	0	1	0	0	0	0	1	23	14	15	6	9	3	10	25	0	3	1	1	3	7	2	0	0	0	2	1	2
LGDELGTDPYEDFQE	CTTGGTGATGAACTAGGTACTGATCCTTATGAAGATTTTCAAGAA	0	LGDELGTDPYEDFQE	0	0	0	0	0	5	0	0	1	0	0	0	0	0	0	13	25	12	7	12	3	9	11	1	0	1	8	7	4	12	0	0	3	0	0	2
GDELGTDPYEDFQEN	GGTGATGAATTGGGTACCGACCCTTACGAGGATTTTCAGGAAAAC	0	GDELGTDPYEDFQEN	0	0	0	0	0	2	0	0	12	0	0	2	0	0	2	26	34	24	5	2	3	7	29	0	3	0	7	9	1	13	2	1	4	5	0	2
DELGTDPYEDFQENW	GATGAACTTGGTACTGATCCCTATGAAGATTTTCAAGAAAATTGG	0	DELGTDPYEDFQENW	0	0	0	0	0	4	0	0	1	0	0	0	1	0	0	8	12	8	9	2	1	9	6	0	3	0	4	9	0	5	1	0	7	1	0	5
ELGTDPYEDFQENWN	GAATTGGGTACTGATCCCTATGAGGACTTCCAAGAGAATTGGAAC	0	ELGTDPYEDFQENWN	0	0	0	6	0	3	9	0	4	11	0	0	1	0	0	18	22	13	23	7	1	9	9	1	10	0	2	23	5	8	2	0	0	14	3	1
LGTDPYEDFQENWNT	TTGGGGACAGACCCCTATGAAGATTTCCAAGAGAACTGGAATACA	0	LGTDPYEDFQENWNT	0	0	1	5	0	2	11	0	3	12	0	3	0	1	1	15	16	15	34	12	5	2	14	0	19	1	0	19	10	5	8	0	0	24	2	2
GTDPYEDFQENWNTK	GGCACCGACCCTTACGAAGATTTCCAAGAGAACTGGAACACGAAA	0	GTDPYEDFQENWNTK	0	0	0	1	5	0	2	4	0	1	2	1	1	0	0	14	14	18	20	6	0	11	11	1	8	0	1	17	8	9	2	0	0	10	2	2
TDPYEDFQENWNTKH	ACGGATCCTTATGAAGATTTCCAAGAAAACTGGAATACTAAACAT	0	TDPYEDFQENWNTKH	0	0	0	0	0	0	0	0	0	0	0	0	0	0	0	5	7	1	5	5	0	3	6	0	4	1	0	5	0	0	0	0	0	1	1	0
DPYEDFQENWNTKHS	GATCCCTATGAGGATTTTCAAGAGAATTGGAATACGAAACATAGC	0	DPYEDFQENWNTKHS	0	0	0	0	5	0	0	6	0	0	0	0	0	0	0	14	13	14	8	14	0	10	14	2	3	0	1	7	8	0	1	0	0	0	3	0
PYEDFQENWNTKHSS	CCATACGAAGACTTTCAAGAAAATTGGAATACTAAGCATTCAAGC	0	PYEDFQENWNTKHSS	0	0	0	10	0	0	15	0	0	2	0	0	1	0	0	11	16	9	16	9	2	10	10	0	2	3	1	13	14	7	1	0	0	3	2	0
YEDFQENWNTKHSSG	TACGAAGACTTCCAGGAAAATTGGAATACGAAACATAGTTCCGGT	0	YEDFQENWNTKHSSG	0	0	0	0	8	0	0	13	1	0	2	1	0	0	1	9	18	14	10	14	8	3	10	3	1	1	1	4	17	7	0	0	1	3	6	1
EDFQENWNTKHSSGV	GAGGACTTCCAAGAAAATTGGAATACTAAGCATTCCTCTGGGGTA	0	EDFQENWNTKHSSGV	0	0	0	3	3	0	9	2	0	5	2	0	0	1	0	18	24	20	44	19	4	5	17	0	10	4	1	26	20	8	2	0	0	17	2	4
DFQENWNTKHSSGVT	GATTTTCAAGAAAATTGGAATACGAAGCATTCATCAGGAGTCACT	0	DFQENWNTKHSSGVT	0	0	0	0	0	0	0	0	0	0	0	0	0	0	1	8	11	6	20	16	7	3	6	0	13	2	0	15	15	10	5	1	0	11	3	1
FQENWNTKHSSGVTR	TTTCAAGAGAACTGGAATACCAAGCACTCCTCTGGCGTGACTAGA	0	FQENWNTKHSSGVTR	0	0	0	6	1	0	2	3	0	1	2	0	0	1	0	13	15	10	8	23	7	1	8	1	1	6	0	5	20	14	0	3	1	2	11	2
QENWNTKHSSGVTRE	CAAGAAAACTGGAATACGAAACATTCATCAGGCGTTACCCGAGAG	0	QENWNTKHSSGVTRE	0	0	0	0	0	0	1	0	0	2	0	0	3	0	0	19	13	9	7	15	16	9	16	0	0	5	2	5	22	38	0	0	1	0	5	4
ENWNTKHSSGVTREL	GAAAATTGGAATACCAAGCACAGTTCCGGTGTTACTAGAGAACTA	0	ENWNTKHSSGVTREL	0	0	0	0	0	0	0	0	0	0	0	0	1	0	0	18	16	15	12	11	9	14	17	0	4	0	0	11	7	18	1	0	0	4	2	1
NWNTKHSSGVTRELM	AATTGGAATACGAAGCACTCAAGCGGAGTCACCAGGGAATTAATG	0	NWNTKHSSGVTRELM	0	0	0	0	0	0	0	0	0	0	0	0	0	0	0	4	8	7	3	5	3	4	7	0	0	0	0	2	2	3	0	0	0	2	1	0
WNTKHSSGVTRELMR	TGGAATACTAAACATAGCTCTGGAGTAACTCGTGAACTGATGCGA	0	WNTKHSSGVTRELMR	0	0	0	0	0	0	0	0	0	0	0	1	0	0	0	16	21	12	6	8	0	11	8	2	1	0	1	4	7	0	0	0	0	1	3	0
NTKHSSGVTRELMRE	AATACCAAACATTCTTCAGGTGTCACTCGCGAGTTAATGCGTGAA	0	NTKHSSGVTRELMRE	0	0	0	1	0	7	2	0	17	1	0	0	0	0	1	22	32	27	20	16	40	18	17	2	4	1	11	25	12	64	0	3	4	8	0	21
TKHSSGVTRELMREL	ACGAAACATTCATCCGGTGTCACACGTGAATTGATGAGAGAATTA	0	TKHSSGVTRELMREL	0	0	0	1	1	1	0	0	0	0	0	0	0	1	0	11	13	9	12	6	7	3	13	0	1	1	1	20	6	15	0	1	0	4	0	4
KHSSGVTRELMRELN	AAGCACAGCTCAGGCGTTACCAGGGAGCTAATGCGCGAACTAAAC	0	KHSSGVTRELMRELN	0	0	0	15	7	14	59	22	62	134	39	51	135	43	70	21	20	30	61	64	70	1	19	2	112	32	90	20	46	61	96	30	115	43	32	44
HSSGVTRELMRELNG	CATTCTTCAGGTGTTACAAGGGAGCTCATGAGGGAACTAAACGGT	0	HSSGVTRELMRELNG	0	0	0	3	17	23	27	20	71	30	14	79	23	7	99	29	34	26	65	55	63	1	21	1	118	34	81	21	37	48	118	10	104	61	24	30
SSGVTRELMRELNGG	TCATCAGGGGTTACGAGGGAATTAATGAGAGAATTGAATGGAGGT	0	SSGVTRELMRELNGG	0	0	0	17	1	35	61	1	74	72	0	89	46	1	114	17	18	11	47	25	53	5	18	1	68	3	53	14	20	46	61	0	78	47	4	38
SGVTRELMRELNGGA	TCAGGGGTGACAAGGGAACTGATGAGAGAATTAAATGGCGGTGCC	0	SGVTRELMRELNGGA	0	0	0	6	1	11	14	5	41	26	3	43	22	1	54	9	8	5	14	4	17	2	6	0	41	3	35	9	5	7	34	2	45	12	3	9
GVTRELMRELNGGAY	GGCGTGACCAGGGAGTTAATGCGTGAACTAAACGGTGGAGCATAC	0	GVTRELMRELNGGAY	0	0	0	3	0	26	17	6	75	26	14	85	49	13	248	10	17	10	25	64	66	0	15	2	59	60	127	7	14	24	114	67	183	14	34	24
VTRELMRELNGGAYT	GTCACAAGGGAATTAATGCGAGAATTAAATGGAGGAGCTTATACC	0	VTRELMRELNGGAYT	0	0	0	6	0	10	10	0	2	2	0	3	1	0	1	2	5	7	1	6	6	2	9	1	3	0	2	6	3	9	0	1	1	2	1	1
TRELMRELNGGAYTR	ACACGTGAACTCATGAGAGAATTAAATGGTGGTGCATACACCAGA	0	TRELMRELNGGAYTR	0	1	1	26	25	38	65	48	143	114	81	126	95	80	206	12	14	16	24	36	54	0	11	0	46	39	79	9	14	51	40	49	121	39	21	55
RELMRELNGGAYTRY	CGTGAATTGATGAGAGAACTTAACGGTGGTGCATACACTAGGTAC	0	RELMRELNGGAYTRY	1	0	0	32	26	38	105	86	160	191	130	202	258	226	357	11	22	26	49	179	135	0	10	0	116	182	221	5	36	39	169	267	365	27	76	39
ELMRELNGGAYTRYV	GAACTTATGCGTGAACTAAACGGTGGCGCATACACCCGGTATGTT	0	ELMRELNGGAYTRYV	1	0	0	50	42	20	128	84	91	298	162	86	391	275	202	18	32	30	51	140	117	2	23	1	111	99	217	9	27	35	148	151	383	25	62	53
LMRELNGGAYTRYVD	TTAATGAGAGAATTAAACGGTGGGGCGTATACCAGATACGTGGAT	0	LMRELNGGAYTRYVD	0	0	0	1	8	9	2	4	22	0	3	19	2	0	7	10	14	8	20	20	42	7	15	0	13	1	23	12	10	35	3	1	15	14	3	32
MRELNGGAYTRYVDN	ATGAGGGAATTGAACGGGGGTGCATATACCAGATATGTTGACAAT	0	MRELNGGAYTRYVDN	0	0	0	13	12	1	35	5	1	31	0	1	11	3	0	17	22	19	41	23	15	5	16	0	30	3	0	36	15	17	11	1	0	40	5	2
RELNGGAYTRYVDNN	AGAGAATTAAACGGCGGTGCCTACACTAGATATGTCGACAATAAC	0	RELNGGAYTRYVDNN	0	0	0	14	8	1	41	2	2	69	1	2	44	0	1	16	24	20	37	35	17	3	30	0	62	4	8	31	17	28	42	1	0	39	11	8
ELNGGAYTRYVDNNF	GAGTTAAACGGAGGAGCATATACTAGATATGTCGATAATAACTTT	0	ELNGGAYTRYVDNNF	0	0	0	3	0	8	11	0	19	4	0	10	0	0	7	16	27	15	28	27	14	9	15	0	24	3	6	32	17	15	2	1	4	27	4	7
LNGGAYTRYVDNNFC	CTAAACGGTGGTGCATATACGAGATATGTAGATAATAATTTCTGT	0	LNGGAYTRYVDNNFC	0	1	0	20	1	23	49	4	33	52	0	22	31	1	8	23	15	16	63	23	20	1	15	1	86	7	11	32	21	59	64	4	0	57	9	26
NGGAYTRYVDNNFCG	AATGGTGGAGCATACACACGATACGTTGATAATAATTTTTGTGGT	0	NGGAYTRYVDNNFCG	0	0	0	13	2	7	31	7	5	81	2	2	48	1	1	23	18	20	43	26	3	4	20	1	75	8	5	20	20	22	48	5	2	47	13	6
GGAYTRYVDNNFCGP	GGCGGTGCGTACACAAGGTATGTTGATAACAATTTTTGCGGGCCA	0	GGAYTRYVDNNFCGP	0	0	0	7	0	0	15	0	4	6	0	3	1	0	0	13	23	15	15	16	9	6	14	0	18	1	5	22	20	8	10	0	1	10	9	3
GAYTRYVDNNFCGPD	GGTGCATACACTAGGTATGTGGACAACAACTTCTGTGGTCCAGAT	0	GAYTRYVDNNFCGPD	0	0	0	11	2	2	59	2	12	73	1	9	40	0	3	10	26	18	35	24	12	4	12	1	50	12	3	18	14	15	24	4	2	33	13	5
AYTRYVDNNFCGPDG	GCCTATACTAGATATGTAGATAACAATTTCTGTGGCCCTGACGGA	0	AYTRYVDNNFCGPDG	0	0	0	18	8	5	30	8	10	14	3	3	4	0	5	14	16	22	23	14	3	10	20	2	18	7	4	20	15	10	7	1	0	15	5	4
YTRYVDNNFCGPDGY	TATACTCGTTATGTGGATAACAATTTCTGCGGCCCAGATGGTTAT	0	YTRYVDNNFCGPDGY	0	0	0	6	13	22	9	11	50	11	4	41	4	2	15	14	22	19	31	40	50	5	15	2	22	12	23	25	32	68	15	6	16	41	13	30
TRYVDNNFCGPDGYP	ACTAGATATGTCGACAATAATTTCTGCGGGCCAGATGGTTATCCA	0	TRYVDNNFCGPDGYP	0	0	0	0	0	0	0	0	1	0	0	3	0	0	0	4	6	5	6	21	1	1	5	0	3	4	3	4	16	3	0	1	0	5	3	3
RYVDNNFCGPDGYPL	AGATACGTAGACAATAATTTTTGTGGCCCTGATGGCTACCCACTC	0	RYVDNNFCGPDGYPL	0	0	0	11	1	1	18	3	1	20	1	1	2	1	0	6	16	12	17	14	4	9	11	0	7	7	4	21	6	11	4	5	2	12	4	3
YVDNNFCGPDGYPLE	TACGTAGATAACAATTTCTGCGGTCCAGATGGCTACCCACTGGAA	0	YVDNNFCGPDGYPLE	0	0	0	3	0	3	2	0	6	1	0	3	0	0	2	10	14	14	6	15	0	2	9	0	8	2	0	8	10	0	2	2	0	4	5	0
VDNNFCGPDGYPLEC	GTTGATAATAATTTTTGTGGTCCAGACGGTTACCCATTAGAATGC	0	VDNNFCGPDGYPLEC	0	0	0	1	3	3	3	1	3	3	0	3	1	0	2	10	19	6	10	4	2	5	11	0	3	0	0	11	3	7	0	0	0	5	0	2
DNNFCGPDGYPLECI	GATAATAATTTCTGTGGTCCTGATGGATACCCACTTGAATGTATC	0	DNNFCGPDGYPLECI	0	0	0	2	0	0	9	0	0	3	0	0	0	0	1	10	14	15	17	21	0	8	19	3	5	3	0	18	9	1	2	1	0	7	4	0
NNFCGPDGYPLECIK	AACAATTTTTGTGGGCCAGACGGTTACCCCCTGGAATGCATTAAA	0	NNFCGPDGYPLECIK	0	1	0	0	0	2	1	1	1	0	0	1	0	0	0	21	17	11	21	8	3	5	20	0	3	1	0	17	3	5	3	0	0	6	1	0
NFCGPDGYPLECIKD	AATTTCTGTGGGCCAGATGGATATCCACTGGAATGCATTAAAGAT	0	NFCGPDGYPLECIKD	0	0	0	2	2	2	0	4	7	0	2	5	0	0	3	13	18	8	19	9	0	6	3	1	0	1	0	15	7	0	0	2	0	5	2	0
FCGPDGYPLECIKDL	TTTTGCGGACCTGATGGTTATCCTTTAGAGTGCATTAAAGATTTA	0	FCGPDGYPLECIKDL	0	0	0	12	1	11	31	0	20	13	1	18	0	0	4	12	16	8	23	15	11	6	17	0	6	2	10	13	10	9	4	0	5	7	2	13
CGPDGYPLECIKDLL	TGTGGTCCAGACGGATATCCTTTAGAATGCATCAAAGATTTACTT	0	CGPDGYPLECIKDLL	0	0	0	17	8	6	51	9	27	51	4	10	11	0	11	14	12	15	23	17	31	5	15	0	18	6	12	19	10	35	5	2	12	28	6	31
GPDGYPLECIKDLLA	GGTCCGGATGGGTACCCACTCGAGTGCATTAAGGACCTGCTCGCT	0	GPDGYPLECIKDLLA	0	0	0	10	14	19	29	17	74	45	27	102	28	23	188	15	19	21	41	61	64	1	16	1	38	52	107	12	33	27	52	47	115	24	22	24
PDGYPLECIKDLLAR	CCCGACGGATACCCACTAGAATGTATAAAAGACCTGCTGGCGCGT	0	PDGYPLECIKDLLAR	0	0	1	5	15	3	31	31	11	51	85	9	52	120	17	3	6	5	20	37	19	0	3	1	14	43	34	3	6	11	36	51	43	13	21	9
DGYPLECIKDLLARA	GATGGTTACCCATTAGAATGTATCAAGGATCTTTTAGCAAGAGCA	0	DGYPLECIKDLLARA	0	0	0	17	27	21	66	42	81	99	52	128	73	54	160	13	16	18	40	47	64	1	21	0	69	27	102	17	9	60	73	29	175	31	24	32
GYPLECIKDLLARAG	GGATATCCACTGGAGTGTATAAAAGACTTGTTAGCAAGGGCTGGA	0	GYPLECIKDLLARAG	0	0	0	3	2	4	6	0	11	8	0	14	7	0	12	14	9	12	19	27	11	2	9	1	23	15	5	12	6	10	12	6	4	22	10	5
YPLECIKDLLARAGK	TATCCATTGGAGTGCATCAAGGACTTATTGGCCCGTGCAGGAAAG	0	YPLECIKDLLARAGK	0	0	0	0	0	2	2	0	1	0	0	0	0	0	0	14	23	10	3	4	34	7	9	0	0	0	36	14	1	47	1	0	19	2	1	9
PLECIKDLLARAGKA	CCATTGGAGTGTATTAAAGATCTCTTAGCCAGAGCAGGTAAGGCA	0	PLECIKDLLARAGKA	0	0	0	0	0	0	0	0	0	0	0	0	1	0	1	14	25	15	3	0	11	7	13	0	2	0	0	2	0	19	1	0	0	0	0	1
LECIKDLLARAGKAS	TTGGAGTGTATCAAAGATCTGTTAGCGAGAGCCGGAAAAGCGTCT	0	LECIKDLLARAGKAS	0	0	1	3	0	0	6	0	0	5	0	0	2	0	0	19	11	12	0	0	0	6	10	0	0	1	0	1	0	0	0	0	0	3	0	0
ECIKDLLARAGKASC	GAATGCATCAAAGATCTGCTAGCCCGTGCTGGTAAGGCTTCATGT	0	ECIKDLLARAGKASC	0	1	0	10	120	46	22	221	111	22	336	103	13	374	63	30	37	44	34	115	52	22	22	0	3	139	44	25	51	79	3	138	33	13	90	51
CIKDLLARAGKASCT	TGTATTAAAGATTTATTAGCGAGAGCGGGTAAAGCTTCCTGTACC	0	CIKDLLARAGKASCT	0	0	0	0	0	1	0	0	3	0	0	0	0	0	1	5	6	8	2	0	0	6	7	0	0	0	0	0	0	0	1	0	0	0	0	0
IKDLLARAGKASCTL	ATTAAAGATTTGCTGGCTAGGGCAGGCAAGGCCTCGTGTACATTG	0	IKDLLARAGKASCTL	0	0	0	0	0	0	0	0	0	0	0	0	0	0	1	39	35	23	4	4	0	17	31	3	0	1	0	0	2	0	0	0	1	2	1	0
KDLLARAGKASCTLS	AAAGATCTGTTAGCGAGAGCGGGTAAGGCTTCATGCACACTGTCA	0	KDLLARAGKASCTLS	0	0	0	2	8	10	1	19	10	1	9	2	0	9	0	17	43	23	8	55	9	13	13	1	4	47	4	16	25	17	1	50	0	3	37	7
DLLARAGKASCTLSE	GATTTGTTGGCCCGAGCAGGCAAGGCTAGTTGTACGTTGTCCGAA	0	DLLARAGKASCTLSE	0	0	0	6	15	9	8	24	5	4	22	4	2	11	0	26	37	40	29	82	5	11	24	1	14	48	3	26	48	20	2	38	1	13	47	4
LLARAGKASCTLSEQ	TTATTGGCAAGGGCGGGTAAAGCTAGCTGTACACTTTCTGAGCAA	0	LLARAGKASCTLSEQ	1	0	0	1	0	4	0	0	2	0	1	0	0	1	0	28	26	25	16	2	1	10	24	0	4	2	0	9	2	4	0	0	0	3	2	0
LARAGKASCTLSEQL	CTTGCTCGAGCTGGAAAGGCATCATGCACATTGAGCGAACAACTG	0	LARAGKASCTLSEQL	0	0	0	3	0	4	1	0	12	1	0	5	0	0	8	18	28	24	22	10	0	5	8	1	5	2	0	16	6	0	2	0	0	4	6	0
ARAGKASCTLSEQLD	GCACGTGCTGGTAAAGCTTCTTGTACTTTATCAGAGCAGTTGGAT	0	ARAGKASCTLSEQLD	0	0	0	10	0	7	7	0	9	3	0	5	1	0	0	8	19	21	27	18	1	11	21	0	9	1	3	18	8	16	1	0	0	5	0	4
RAGKASCTLSEQLDF	CGGGCAGGCAAGGCGTCTTGCACACTTAGTGAACAACTCGACTTT	0	RAGKASCTLSEQLDF	0	0	1	12	31	24	24	59	37	5	54	13	1	21	4	39	53	31	34	68	36	16	32	2	13	30	12	48	32	52	2	14	2	11	41	21
AGKASCTLSEQLDFI	GCAGGGAAGGCCTCCTGTACCTTGTCTGAACAGTTGGACTTCATT	0	AGKASCTLSEQLDFI	1	0	0	11	36	18	11	27	53	3	22	37	3	12	11	22	27	28	45	40	45	13	27	1	20	17	24	45	19	73	7	9	9	19	18	27
GKASCTLSEQLDFID	GGGAAAGCCTCCTGTACACTATCAGAACAATTGGATTTTATTGAT	0	GKASCTLSEQLDFID	0	0	0	11	2	1	9	4	1	6	1	0	0	0	1	11	10	22	18	3	2	11	9	0	11	0	1	13	4	2	4	2	2	7	4	2
KASCTLSEQLDFIDT	AAAGCTTCCTGTACATTAAGTGAACAATTGGACTTTATTGATACA	0	KASCTLSEQLDFIDT	0	0	0	3	7	7	3	2	9	4	0	3	0	0	2	18	20	13	13	13	15	6	16	0	4	1	3	12	6	36	0	0	2	6	5	10
ASCTLSEQLDFIDTK	GCCTCCTGCACTCTATCGGAGCAGTTGGATTTTATAGACACTAAA	0	ASCTLSEQLDFIDTK	0	0	0	10	3	9	14	10	22	6	8	19	2	9	17	14	11	6	15	18	13	5	12	1	12	9	17	15	14	22	3	13	22	7	10	12
SCTLSEQLDFIDTKR	TCATGTACACTAAGTGAGCAGTTAGATTTCATTGATACTAAGAGA	0	SCTLSEQLDFIDTKR	0	0	0	23	20	26	44	58	86	25	32	65	4	26	78	18	22	17	34	65	51	4	13	2	9	23	69	29	23	38	3	21	50	21	28	49
CTLSEQLDFIDTKRG	TGTACTCTTTCTGAACAGCTAGATTTTATTGATACCAAGCGAGGT	0	CTLSEQLDFIDTKRG	0	0	0	7	13	14	19	30	54	4	21	54	0	16	42	13	19	20	28	38	32	9	11	1	6	29	39	19	26	29	1	23	38	13	25	25
TLSEQLDFIDTKRGV	ACGTTGTCTGAACAGTTGGACTTTATAGATACAAAAAGGGGTGTT	0	TLSEQLDFIDTKRGV	2	0	0	7	23	22	24	76	68	8	148	90	14	224	137	21	35	20	39	156	206	9	14	0	29	204	318	33	32	58	17	312	470	44	93	56
LSEQLDFIDTKRGVY	CTTAGTGAACAGCTTGATTTCATTGATACTAAGAGGGGTGTTTAC	0	LSEQLDFIDTKRGVY	0	0	0	3	27	30	10	74	65	8	175	78	4	246	139	10	16	10	40	163	100	4	9	0	27	218	199	21	25	26	12	412	301	36	67	23
SEQLDFIDTKRGVYC	TCCGAACAACTGGATTTCATTGATACTAAGAGGGGCGTATATTGC	0	SEQLDFIDTKRGVYC	0	0	0	10	32	30	21	54	120	27	108	131	15	169	215	17	18	11	46	136	103	3	12	0	51	189	146	23	22	51	33	293	230	46	63	37
EQLDFIDTKRGVYCC	GAACAATTGGACTTTATCGATACCAAAAGGGGCGTATACTGTTGC	0	EQLDFIDTKRGVYCC	0	0	0	21	39	42	50	122	192	88	246	202	47	286	387	18	25	23	50	136	122	11	14	1	77	153	266	30	30	64	59	212	403	55	68	65
QLDFIDTKRGVYCCR	CAGCTGGACTTTATAGATACCAAAAGAGGGGTATACTGTTGCAGA	0	QLDFIDTKRGVYCCR	0	0	0	20	33	39	46	81	116	85	141	156	56	153	248	15	15	18	51	70	110	2	10	1	75	96	195	16	15	46	58	129	284	46	55	37
LDFIDTKRGVYCCRE	CTCGACTTCATTGACACCAAACGTGGCGTATATTGTTGCAGGGAG	0	LDFIDTKRGVYCCRE	0	0	0	0	58	25	1	151	90	1	208	108	1	197	140	16	16	24	21	105	47	5	20	0	16	89	91	21	36	36	4	99	93	14	60	27
DFIDTKRGVYCCREH	GATTTTATTGATACTAAGAGAGGCGTGTACTGTTGTCGCGAGCAT	0	DFIDTKRGVYCCREH	0	0	0	10	48	22	5	108	52	2	163	30	2	88	21	16	19	24	21	66	12	9	18	1	8	63	12	12	20	17	3	69	5	13	40	15
FIDTKRGVYCCREHE	TTTATCGATACAAAAAGAGGTGTTTATTGTTGTCGAGAACATGAA	0	FIDTKRGVYCCREHE	0	0	0	9	1	1	2	4	1	0	2	0	0	0	0	11	23	16	11	22	22	10	19	0	5	13	15	20	5	32	1	9	7	7	14	20
IDTKRGVYCCREHEH	ATAGATACAAAGAGGGGTGTATATTGTTGCAGGGAACATGAACAC	0	IDTKRGVYCCREHEH	0	0	0	1	13	7	7	17	11	1	16	10	0	4	2	22	16	15	15	24	15	9	10	2	8	5	5	16	13	11	2	5	5	11	11	10
DTKRGVYCCREHEHE	GATACTAAGAGGGGCGTCTACTGCTGTAGAGAGCACGAACATGAA	0	DTKRGVYCCREHEHE	0	1	0	1	2	14	3	6	22	0	1	14	0	0	6	27	22	21	19	33	9	14	22	0	2	5	4	20	24	10	0	4	4	5	10	6
TKRGVYCCREHEHEI	ACCAAGAGAGGAGTCTATTGTTGCAGAGAGCATGAACATGAGATA	0	TKRGVYCCREHEHEI	1	0	0	5	0	6	1	6	7	1	4	1	0	0	0	22	35	17	8	6	4	10	17	0	3	3	0	8	4	11	2	0	0	4	1	4
KRGVYCCREHEHEIA	AAGAGAGGGGTTTACTGCTGTAGGGAACACGAACATGAGATTGCA	0	KRGVYCCREHEHEIA	0	0	0	4	10	6	4	16	13	1	2	15	0	0	3	21	40	24	11	19	31	10	21	1	9	6	4	15	7	57	1	5	4	8	4	12
RGVYCCREHEHEIAW	AGAGGTGTTTATTGTTGTCGAGAGCATGAACACGAGATAGCGTGG	0	RGVYCCREHEHEIAW	0	0	0	4	0	0	6	0	0	5	0	0	0	0	0	4	15	13	11	4	0	6	11	0	4	1	3	12	6	11	0	2	0	5	0	0
GVYCCREHEHEIAWY	GGTGTATACTGCTGTAGAGAGCACGAACATGAAATTGCATGGTAT	0	GVYCCREHEHEIAWY	0	0	0	7	8	9	8	8	14	16	0	1	7	0	0	33	31	27	31	20	16	8	32	3	10	8	4	36	19	11	1	4	0	8	4	3
VYCCREHEHEIAWYT	GTATATTGTTGTCGTGAACATGAACATGAAATTGCCTGGTATACT	0	VYCCREHEHEIAWYT	0	0	0	0	0	4	1	0	0	0	0	1	0	0	0	16	25	13	15	13	4	14	13	3	4	0	3	20	6	1	0	0	0	7	3	0
YCCREHEHEIAWYTE	TATTGCTGCCGCGAGCACGAACACGAAATAGCCTGGTATACAGAA	0	YCCREHEHEIAWYTE	0	0	0	2	1	2	1	3	1	0	2	1	0	1	1	15	15	13	12	7	7	2	11	0	0	1	1	12	5	8	1	0	0	3	0	0
CCREHEHEIAWYTER	TGTTGTAGGGAACACGAACATGAGATCGCTTGGTATACCGAAAGA	0	CCREHEHEIAWYTER	0	0	0	3	13	0	6	19	5	4	22	0	3	14	5	14	20	19	24	41	10	9	13	1	8	19	3	20	22	34	2	7	1	18	16	3
CREHEHEIAWYTERS	TGTCGGGAACACGAACATGAAATTGCATGGTACACAGAGAGAAGC	0	CREHEHEIAWYTERS	0	0	0	3	12	5	12	15	2	8	20	1	5	12	0	10	16	14	36	31	3	2	16	1	16	16	1	17	12	7	9	5	1	25	16	2
REHEHEIAWYTERSE	CGAGAGCACGAACACGAAATTGCCTGGTACACTGAGAGATCTGAA	0	REHEHEIAWYTERSE	0	0	2	26	7	8	71	9	6	145	1	0	100	2	1	34	37	16	44	40	10	2	17	0	70	4	2	25	35	31	96	1	0	49	7	11
EHEHEIAWYTERSEK	GAGCACGAGCACGAAATAGCGTGGTACACTGAGAGATCTGAAAAG	0	EHEHEIAWYTERSEK	0	0	1	32	27	10	103	17	8	171	9	2	109	0	1	18	32	25	79	39	14	3	37	1	111	6	0	29	24	36	117	1	1	66	13	7
HEHEIAWYTERSEKS	CACGAACATGAGATCGCTTGGTATACTGAGAGGTCCGAAAAATCC	0	HEHEIAWYTERSEKS	0	0	1	11	8	3	36	7	2	86	12	5	85	5	1	11	18	9	32	21	6	0	8	1	44	5	2	8	18	13	73	1	0	17	9	1
EHEIAWYTERSEKSY	GAGCATGAAATAGCATGGTATACTGAAAGATCTGAAAAGTCTTAT	0	EHEIAWYTERSEKSY	0	0	0	29	0	8	88	0	21	164	0	8	210	0	3	16	30	13	65	17	15	2	18	1	103	5	9	10	14	31	138	4	0	19	12	14
HEIAWYTERSEKSYE	CATGAGATCGCGTGGTATACTGAAAGATCAGAAAAAAGTTACGAA	0	HEIAWYTERSEKSYE	0	0	0	18	1	1	60	0	1	121	0	1	156	1	1	15	16	13	42	16	26	1	12	1	89	4	4	6	15	49	108	1	6	14	10	5
EIAWYTERSEKSYEL	GAAATTGCATGGTATACGGAAAGATCCGAGAAATCGTATGAATTG	0	EIAWYTERSEKSYEL	0	0	0	21	17	5	68	18	7	134	15	0	219	8	0	14	23	13	59	15	24	2	9	2	103	2	5	16	12	79	153	2	2	29	3	9
IAWYTERSEKSYELQ	ATAGCTTGGTATACTGAGCGTTCCGAAAAGTCCTACGAATTGCAA	0	IAWYTERSEKSYELQ	0	0	0	4	0	0	0	0	0	0	0	0	0	0	0	35	45	32	2	4	1	18	26	2	0	0	0	1	1	0	0	0	0	0	0	0
AWYTERSEKSYELQT	GCCTGGTATACTGAACGTTCTGAAAAGTCCTATGAACTTCAAACT	0	AWYTERSEKSYELQT	0	0	0	8	0	6	32	0	3	70	0	0	49	0	0	23	21	14	31	6	7	1	16	0	62	4	1	4	11	19	96	0	1	29	4	3
WYTERSEKSYELQTP	TGGTACACTGAAAGATCTGAAAAGAGCTATGAACTTCAAACTCCA	0	WYTERSEKSYELQTP	0	0	0	18	0	3	67	0	4	104	0	1	82	1	0	7	21	14	43	7	9	3	11	2	93	0	2	12	6	20	78	0	0	33	0	0
YTERSEKSYELQTPF	TATACGGAACGATCTGAAAAATCGTACGAGCTACAGACCCCCTTC	0	YTERSEKSYELQTPF	0	0	0	4	23	4	26	10	0	23	0	1	7	0	0	13	18	10	31	9	5	6	16	0	27	0	2	18	7	13	20	1	0	21	3	6
TERSEKSYELQTPFE	ACTGAAAGATCTGAGAAGTCTTACGAACTGCAAACACCTTTTGAA	0	TERSEKSYELQTPFE	0	0	0	2	0	0	2	0	0	6	0	0	2	0	0	12	11	7	22	10	0	3	6	0	18	0	0	21	3	0	3	0	0	22	1	0
ERSEKSYELQTPFEI	GAAAGATCTGAAAAGTCTTATGAGCTACAAACTCCTTTCGAGATT	0	ERSEKSYELQTPFEI	0	0	0	0	0	0	0	0	0	0	0	0	0	0	0	10	11	8	22	1	3	8	6	0	10	0	0	8	3	5	0	0	0	11	0	1
RSEKSYELQTPFEIK	CGCTCAGAGAAGAGCTACGAGCTCCAAACTCCTTTTGAAATTAAA	0	RSEKSYELQTPFEIK	0	0	0	0	0	0	0	0	1	0	0	0	0	0	0	11	8	7	13	4	1	4	7	0	5	0	0	7	5	12	3	0	0	3	0	0
SEKSYELQTPFEIKL	TCTGAAAAATCCTATGAATTGCAAACACCATTCGAGATCAAGTTG	0	SEKSYELQTPFEIKL	0	0	1	2	0	1	7	0	0	3	0	0	1	0	0	16	24	12	44	6	2	5	20	0	23	0	2	33	8	12	6	0	0	34	1	1
EKSYELQTPFEIKLA	GAAAAGAGCTACGAATTACAAACGCCGTTTGAAATCAAACTAGCT	0	EKSYELQTPFEIKLA	0	0	0	0	6	0	2	2	0	0	4	0	0	1	1	24	25	16	27	18	16	13	17	2	13	4	5	24	10	24	9	0	5	13	3	7
KSYELQTPFEIKLAK	AAATCATATGAATTACAAACTCCCTTCGAGATCAAACTTGCTAAA	0	KSYELQTPFEIKLAK	0	0	0	0	0	2	0	0	4	0	0	4	0	0	0	6	9	4	5	18	1	1	7	0	4	4	0	6	10	0	0	2	1	4	8	0
SYELQTPFEIKLAKK	AGTTACGAACTTCAAACACCATTTGAGATAAAGCTCGCCAAGAAG	0	SYELQTPFEIKLAKK	0	0	0	0	2	4	0	2	0	0	3	0	0	0	1	19	29	13	25	26	0	9	22	0	12	6	0	34	24	4	3	2	0	21	6	2
YELQTPFEIKLAKKF	TACGAACTCCAAACTCCGTTTGAAATCAAGTTGGCTAAAAAGTTC	0	YELQTPFEIKLAKKF	0	0	1	1	5	10	0	4	11	2	5	3	1	0	0	16	27	15	16	29	15	10	11	2	3	7	4	12	29	35	0	4	0	4	9	8
ELQTPFEIKLAKKFD	GAATTGCAGACTCCCTTCGAGATTAAGTTAGCTAAAAAGTTCGAT	0	ELQTPFEIKLAKKFD	0	0	1	15	11	15	5	7	18	5	2	7	2	0	2	13	23	16	12	43	23	19	30	1	4	9	3	8	33	41	1	3	0	2	7	6
LQTPFEIKLAKKFDT	CTACAAACACCTTTCGAAATTAAACTTGCAAAGAAGTTCGATACG	0	LQTPFEIKLAKKFDT	0	0	0	2	18	8	0	21	12	2	17	8	1	7	1	18	14	13	6	53	18	9	18	0	0	30	15	10	28	39	1	16	3	3	26	33
QTPFEIKLAKKFDTF	CAAACGCCATTTGAAATCAAATTAGCGAAGAAATTTGACACATTT	0	QTPFEIKLAKKFDTF	0	0	0	0	4	25	1	9	78	0	13	76	1	8	28	10	18	5	5	81	21	8	11	0	2	49	18	7	13	36	2	49	7	4	42	17
TPFEIKLAKKFDTFN	ACTCCGTTTGAAATTAAACTCGCAAAAAAGTTTGATACTTTCAAT	0	TPFEIKLAKKFDTFN	0	0	0	0	8	0	1	7	4	0	9	5	0	6	1	14	26	8	7	43	14	7	11	1	2	30	5	7	22	25	0	24	6	1	42	18
PFEIKLAKKFDTFNG	CCCTTTGAAATCAAACTTGCAAAAAAATTTGACACATTCAATGGT	0	PFEIKLAKKFDTFNG	0	0	0	0	0	2	0	0	2	0	0	2	0	0	1	11	16	11	6	5	14	14	18	0	4	3	2	5	3	18	0	0	0	3	0	1
FEIKLAKKFDTFNGE	TTTGAGATTAAGTTGGCTAAAAAGTTTGATACATTCAACGGGGAA	0	FEIKLAKKFDTFNGE	0	0	0	0	26	0	0	56	1	0	39	1	0	11	1	18	17	14	6	39	24	11	9	0	1	29	9	1	16	49	0	22	0	1	29	11
EIKLAKKFDTFNGEC	GAGATAAAATTAGCCAAAAAATTTGATACATTTAACGGAGAGTGC	0	EIKLAKKFDTFNGEC	0	0	0	1	33	25	3	93	39	1	174	38	0	100	12	17	13	14	12	62	39	10	14	1	5	70	24	10	29	63	3	97	13	7	46	51
IKLAKKFDTFNGECP	ATTAAACTCGCAAAGAAATTCGATACATTTAATGGTGAATGCCCC	0	IKLAKKFDTFNGECP	0	0	0	0	0	0	0	0	0	0	0	0	0	0	0	4	7	4	1	0	5	2	7	0	1	0	0	1	1	4	0	0	0	1	0	0
KLAKKFDTFNGECPN	AAGTTAGCAAAGAAATTTGATACTTTTAATGGTGAATGTCCGAAC	0	KLAKKFDTFNGECPN	0	0	0	3	0	3	13	1	5	5	1	3	0	1	0	6	14	9	16	8	0	3	14	1	3	6	0	7	6	0	3	3	0	4	5	1
LAKKFDTFNGECPNF	CTTGCCAAGAAATTTGACACTTTTAACGGGGAATGTCCTAATTTT	0	LAKKFDTFNGECPNF	0	0	0	5	13	1	7	14	5	6	9	1	4	6	0	13	21	11	23	31	12	3	10	2	22	23	1	19	13	11	13	7	1	18	13	3
AKKFDTFNGECPNFV	GCAAAGAAATTTGACACCTTTAATGGTGAGTGCCCGAATTTTGTC	0	AKKFDTFNGECPNFV	1	0	0	9	5	15	23	6	26	26	5	3	5	0	0	19	21	9	48	5	11	10	13	0	26	5	0	31	12	12	12	1	0	29	9	4
KKFDTFNGECPNFVF	AAAAAGTTTGACACATTTAATGGAGAGTGTCCCAATTTCGTTTTT	0	KKFDTFNGECPNFVF	0	0	0	10	0	11	35	0	26	31	0	10	12	0	5	17	22	19	44	26	9	6	16	0	36	6	6	33	11	29	21	4	0	37	7	11
KFDTFNGECPNFVFP	AAATTTGACACCTTCAATGGTGAGTGCCCAAATTTCGTCTTTCCT	0	KFDTFNGECPNFVFP	0	0	1	16	5	13	63	27	18	86	6	8	55	0	4	21	27	22	60	46	28	5	29	2	93	15	22	26	29	57	69	11	6	65	21	27
FDTFNGECPNFVFPL	TTCGATACTTTTAATGGTGAATGCCCAAACTTCGTTTTTCCTTTA	0	FDTFNGECPNFVFPL	0	0	0	11	20	6	9	28	12	18	9	8	6	0	0	12	23	7	34	25	4	2	19	1	55	8	4	21	16	21	32	4	2	42	6	10
DTFNGECPNFVFPLN	GACACATTTAACGGTGAATGTCCTAACTTTGTCTTTCCGTTGAAC	0	DTFNGECPNFVFPLN	1	0	0	3	18	2	11	43	11	23	21	8	11	16	4	10	18	13	32	26	2	1	8	0	32	11	1	15	9	5	19	6	1	30	9	1
TFNGECPNFVFPLNS	ACATTCAATGGCGAATGTCCTAATTTCGTGTTCCCATTAAACAGT	0	TFNGECPNFVFPLNS	1	1	0	24	13	36	127	36	126	183	27	160	155	24	202	19	35	21	69	83	111	4	14	1	117	48	244	24	51	67	104	44	285	83	52	76
FNGECPNFVFPLNSI	TTTAATGGCGAATGCCCAAATTTTGTCTTCCCACTTAATAGCATA	0	FNGECPNFVFPLNSI	0	0	0	6	33	46	9	62	139	9	98	143	2	96	175	23	25	12	42	97	77	2	14	2	18	95	119	29	24	19	9	104	146	18	54	47
NGECPNFVFPLNSII	AATGGCGAATGTCCAAATTTCGTATTTCCGCTAAATTCTATTATA	0	NGECPNFVFPLNSII	0	0	1	9	55	30	31	119	71	34	139	118	10	103	141	21	21	13	39	74	86	6	14	0	32	62	140	23	34	38	12	66	198	35	73	69
GECPNFVFPLNSIIK	GGCGAATGCCCGAATTTTGTGTTTCCACTTAATAGCATAATCAAG	0	GECPNFVFPLNSIIK	1	0	1	10	10	32	13	16	111	7	9	133	3	9	87	16	19	28	28	46	43	9	25	0	10	19	47	31	17	23	2	8	36	17	19	36
ECPNFVFPLNSIIKT	GAATGTCCAAATTTCGTCTTTCCGCTGAATTCAATTATCAAGACT	0	ECPNFVFPLNSIIKT	0	0	0	9	24	26	16	43	82	6	20	112	1	7	80	22	23	9	33	39	88	12	26	0	12	12	91	29	27	73	2	8	108	20	17	114
CPNFVFPLNSIIKTI	TGTCCAAATTTCGTCTTTCCACTAAATAGCATTATTAAAACAATT	0	CPNFVFPLNSIIKTI	0	0	0	2	1	11	1	2	19	0	0	36	0	0	7	17	13	11	4	17	14	4	22	0	3	7	7	2	11	31	0	2	3	0	5	31
PNFVFPLNSIIKTIQ	CCCAACTTTGTTTTCCCACTAAATAGTATAATTAAAACAATTCAA	0	PNFVFPLNSIIKTIQ	0	0	0	2	4	4	2	5	5	0	6	3	1	4	1	10	8	3	1	10	10	8	10	0	0	7	8	4	6	19	1	3	2	1	8	16
NFVFPLNSIIKTIQP	AATTTTGTTTTCCCTCTTAATTCAATAATTAAGACTATTCAACCC	0	NFVFPLNSIIKTIQP	0	0	0	0	0	10	0	0	36	0	0	37	0	0	8	5	9	4	9	7	14	3	3	0	3	0	2	7	6	8	0	0	4	1	1	12
FVFPLNSIIKTIQPR	TTCGTATTTCCCCTGAACTCGATTATCAAAACTATACAACCAAGA	0	FVFPLNSIIKTIQPR	0	1	0	0	8	11	0	28	20	1	18	7	0	6	0	11	14	11	4	39	19	5	15	0	1	19	8	4	18	23	0	12	2	0	23	8
VFPLNSIIKTIQPRV	GTTTTTCCGTTAAACTCAATCATTAAGACGATCCAACCAAGAGTG	0	VFPLNSIIKTIQPRV	0	0	0	0	22	10	0	77	22	0	100	12	1	80	15	4	5	7	10	38	28	1	6	0	0	24	29	6	7	40	0	28	39	4	19	46
FPLNSIIKTIQPRVE	TTCCCATTAAACTCAATTATTAAAACAATACAACCTAGGGTTGAG	0	FPLNSIIKTIQPRVE	0	0	0	1	0	7	2	0	6	0	0	3	0	0	1	8	16	15	10	10	6	10	11	1	0	1	3	9	6	23	1	0	1	2	3	4
PLNSIIKTIQPRVEK	CCATTGAACTCCATTATCAAAACTATACAACCGAGAGTCGAAAAA	0	PLNSIIKTIQPRVEK	0	0	0	0	0	0	0	0	0	0	0	0	1	0	0	7	16	5	4	1	0	8	13	0	1	0	0	3	0	0	0	0	0	0	0	0
LNSIIKTIQPRVEKK	CTGAACTCGATTATCAAAACCATTCAGCCTAGAGTAGAAAAAAAG	0	LNSIIKTIQPRVEKK	0	0	0	0	0	0	0	0	0	0	0	0	0	0	0	19	26	15	0	0	8	5	17	0	0	0	2	1	0	5	0	0	1	1	0	3
NSIIKTIQPRVEKKK	AACTCTATCATCAAAACAATTCAACCCCGGGTTGAAAAAAAGAAA	0	NSIIKTIQPRVEKKK	0	0	0	0	1	0	0	2	0	0	3	0	0	1	0	28	22	16	1	10	0	9	18	0	0	1	1	3	9	0	0	0	0	0	3	1
SIIKTIQPRVEKKKL	TCTATTATAAAAACAATCCAACCCCGTGTAGAGAAGAAAAAACTT	0	SIIKTIQPRVEKKKL	0	0	0	0	0	0	2	0	0	0	0	0	0	0	0	14	10	4	2	4	0	7	5	0	2	0	0	4	2	0	0	0	0	0	0	0
IIKTIQPRVEKKKLD	ATCATCAAAACCATCCAACCTAGAGTTGAAAAAAAGAAGTTAGAT	0	IIKTIQPRVEKKKLD	0	1	0	0	0	0	0	0	3	0	0	0	0	0	1	25	18	15	0	3	0	14	18	3	1	0	0	0	3	0	0	0	0	0	0	0
IKTIQPRVEKKKLDG	ATTAAAACTATTCAGCCAAGAGTTGAGAAAAAAAAGTTAGACGGA	0	IKTIQPRVEKKKLDG	0	0	0	0	0	0	0	0	0	0	0	0	0	0	0	17	13	10	1	0	4	4	13	0	1	1	3	1	0	3	0	0	2	0	0	0
KTIQPRVEKKKLDGF	AAAACGATACAACCTAGAGTCGAAAAGAAAAAACTTGACGGTTTC	0	KTIQPRVEKKKLDGF	0	0	0	4	6	4	5	1	3	4	1	1	1	0	0	14	22	12	2	22	2	9	20	1	0	9	1	2	8	5	0	2	0	4	7	2
TIQPRVEKKKLDGFM	ACTATCCAACCCCGGGTCGAAAAAAAAAAATTGGATGGTTTCATG	0	TIQPRVEKKKLDGFM	0	0	0	0	0	0	0	0	0	0	0	0	1	0	1	8	7	8	0	9	3	5	2	0	0	1	4	0	7	2	1	1	2	0	1	3
IQPRVEKKKLDGFMG	ATTCAACCTAGGGTTGAGAAAAAAAAGTTAGACGGTTTCATGGGG	0	IQPRVEKKKLDGFMG	0	0	0	0	0	4	0	0	3	0	0	1	0	0	0	8	19	14	0	4	0	8	10	0	1	0	2	1	3	1	0	0	0	2	1	1
QPRVEKKKLDGFMGR	CAGCCAAGAGTTGAAAAGAAGAAGCTAGACGGCTTTATGGGCAGA	0	QPRVEKKKLDGFMGR	0	0	0	0	21	1	1	46	1	0	45	0	1	27	0	11	23	17	5	22	8	17	18	0	1	26	3	5	18	39	0	18	0	0	23	5
PRVEKKKLDGFMGRI	CCTCGTGTTGAAAAAAAGAAACTTGACGGTTTTATGGGCCGGATA	0	PRVEKKKLDGFMGRI	0	0	0	0	0	0	0	0	0	0	0	0	0	0	0	3	3	2	1	9	2	1	0	0	0	9	1	1	6	5	0	3	0	0	6	3
RVEKKKLDGFMGRIR	CGTGTAGAAAAAAAGAAACTAGATGGTTTTATGGGTAGAATACGT	0	RVEKKKLDGFMGRIR	0	0	0	0	0	1	3	0	0	3	0	0	0	0	0	15	14	12	2	6	0	15	12	1	1	0	4	3	7	5	1	0	1	0	0	10
VEKKKLDGFMGRIRS	GTGGAAAAGAAGAAACTAGATGGCTTTATGGGCCGAATACGCTCT	0	VEKKKLDGFMGRIRS	0	0	0	0	0	9	0	0	10	0	0	10	0	0	1	16	24	12	2	7	10	11	17	0	3	3	0	6	3	22	0	0	0	1	3	2
EKKKLDGFMGRIRSV	GAGAAGAAAAAGCTGGACGGTTTCATGGGAAGAATTCGTAGCGTT	0	EKKKLDGFMGRIRSV	0	0	0	0	0	5	0	0	5	0	0	3	0	0	0	29	32	27	2	12	18	13	30	1	1	2	4	4	15	36	0	2	0	2	5	6
KKKLDGFMGRIRSVY	AAAAAAAAGTTGGACGGTTTTATGGGCAGAATTCGATCTGTGTAC	0	KKKLDGFMGRIRSVY	0	0	0	0	0	0	0	0	0	0	0	0	0	0	0	11	20	12	1	3	2	10	15	0	4	1	2	1	3	7	0	0	1	0	1	5
KKLDGFMGRIRSVYP	AAGAAGCTTGATGGTTTCATGGGAAGGATAAGATCCGTTTATCCT	0	KKLDGFMGRIRSVYP	0	0	0	0	7	19	5	23	78	1	20	83	0	12	104	11	27	11	12	85	58	7	13	0	8	25	91	20	50	58	1	35	92	4	34	63
KLDGFMGRIRSVYPV	AAGTTGGATGGTTTTATGGGCAGAATAAGATCCGTTTATCCTGTG	0	KLDGFMGRIRSVYPV	0	0	1	3	22	29	2	29	67	1	15	54	0	6	26	13	26	18	18	29	22	10	15	0	7	10	14	21	15	32	0	4	8	7	8	11
LDGFMGRIRSVYPVA	TTGGACGGCTTTATGGGCAGAATCCGTTCTGTTTATCCTGTTGCA	0	LDGFMGRIRSVYPVA	0	0	0	3	33	16	12	63	59	4	69	61	0	61	74	28	19	33	22	78	74	11	21	1	14	38	84	38	35	60	5	46	110	27	51	76
DGFMGRIRSVYPVAS	GATGGTTTCATGGGTAGAATTCGGTCAGTATATCCAGTAGCTAGC	0	DGFMGRIRSVYPVAS	0	0	0	5	23	13	20	93	34	33	115	57	19	148	72	9	10	9	21	87	66	0	11	0	31	63	107	11	26	19	13	109	162	19	52	30
GFMGRIRSVYPVASP	GGATTCATGGGTAGGATCAGATCAGTTTATCCAGTGGCTTCTCCT	0	GFMGRIRSVYPVASP	0	0	0	9	52	8	16	117	24	22	162	35	34	264	79	5	5	9	20	88	70	0	8	1	49	84	123	5	18	28	45	148	170	21	46	19
FMGRIRSVYPVASPN	TTCATGGGTAGGATACGTTCAGTTTACCCAGTGGCCTCCCCAAAT	0	FMGRIRSVYPVASPN	0	0	0	19	16	8	39	44	35	28	28	17	2	12	24	10	16	10	18	35	16	5	13	0	19	23	9	8	13	9	1	13	6	13	7	5
MGRIRSVYPVASPNE	ATGGGCAGAATTAGATCGGTTTACCCTGTAGCCAGTCCAAACGAA	0	MGRIRSVYPVASPNE	0	0	0	6	30	45	12	75	121	17	85	146	12	120	265	14	21	23	51	102	116	1	17	0	78	106	196	22	11	44	90	176	238	33	43	50
GRIRSVYPVASPNEC	GGCAGAATAAGAAGTGTTTATCCAGTAGCAAGTCCTAACGAATGC	0	GRIRSVYPVASPNEC	1	0	0	21	69	25	74	128	105	172	201	125	173	275	165	15	24	25	51	144	188	1	19	0	83	174	268	15	15	76	88	305	406	37	59	63
RIRSVYPVASPNECN	AGAATTAGATCCGTCTACCCTGTAGCCTCACCAAATGAATGTAAC	0	RIRSVYPVASPNECN	0	0	0	17	70	41	57	94	188	76	176	178	43	208	331	14	32	17	39	72	70	3	15	0	44	101	105	17	25	25	54	154	153	49	57	41
IRSVYPVASPNECNQ	ATCAGATCTGTTTATCCAGTAGCAAGCCCAAATGAATGTAACCAA	0	IRSVYPVASPNECNQ	0	0	0	2	1	7	0	0	4	0	0	1	0	0	2	13	20	10	0	7	2	10	15	1	0	1	0	1	3	3	0	1	0	1	1	0
RSVYPVASPNECNQM	AGAAGTGTTTATCCTGTTGCATCTCCAAACGAGTGTAACCAAATG	0	RSVYPVASPNECNQM	0	0	0	3	10	22	14	4	22	9	3	8	3	0	11	20	41	19	47	23	19	14	28	0	18	6	10	44	18	22	5	4	4	20	5	6
SVYPVASPNECNQMC	TCGGTCTATCCTGTTGCAAGTCCGAATGAATGTAATCAGATGTGC	0	SVYPVASPNECNQMC	0	0	0	1	0	47	5	0	102	1	0	118	1	1	85	22	25	27	22	23	32	11	17	2	5	4	38	26	15	47	4	4	26	16	8	27
VYPVASPNECNQMCL	GTCTACCCAGTTGCTTCGCCAAACGAGTGCAATCAAATGTGTCTT	0	VYPVASPNECNQMCL	0	0	0	6	8	6	8	3	8	4	2	0	1	0	0	23	41	32	39	21	16	9	37	5	11	3	5	41	16	39	2	0	0	18	0	2
YPVASPNECNQMCLS	TACCCAGTGGCGTCACCAAACGAGTGTAACCAAATGTGCTTGAGT	0	YPVASPNECNQMCLS	0	0	0	7	0	2	5	0	2	3	0	2	0	0	4	17	30	23	16	11	12	21	18	1	1	2	2	20	7	42	2	1	0	10	1	3
PVASPNECNQMCLST	CCAGTTGCTTCTCCAAATGAATGCAATCAAATGTGCTTGAGCACA	0	PVASPNECNQMCLST	0	0	0	4	0	0	8	0	0	9	0	0	0	0	1	17	23	22	19	0	3	9	18	0	2	0	1	24	1	9	0	0	0	2	0	1
VASPNECNQMCLSTL	GTGGCTTCACCAAATGAATGCAATCAAATGTGCCTGTCAACATTG	0	VASPNECNQMCLSTL	0	0	0	0	11	14	0	15	18	1	3	5	0	0	2	17	20	23	32	37	55	9	14	1	7	14	28	28	34	65	0	3	11	8	6	33
ASPNECNQMCLSTLM	GCATCACCTAATGAATGCAATCAAATGTGTTTATCTACTCTGATG	0	ASPNECNQMCLSTLM	0	1	0	11	11	10	20	12	14	16	2	4	3	0	3	17	22	20	47	24	54	5	20	0	14	5	22	30	22	89	3	1	13	18	7	33
SPNECNQMCLSTLMK	TCCCCTAATGAATGTAACCAAATGTGTTTAAGTACTCTAATGAAG	0	SPNECNQMCLSTLMK	1	0	1	13	4	18	18	8	28	13	2	18	2	2	1	21	18	21	21	11	37	5	18	3	7	4	11	23	14	77	2	0	7	7	7	33
PNECNQMCLSTLMKC	CCTAATGAATGTAACCAAATGTGTCTGAGCACTTTGATGAAATGT	0	PNECNQMCLSTLMKC	0	0	0	16	6	11	28	8	21	21	1	20	7	0	8	23	31	20	46	32	23	13	17	0	11	6	16	25	28	44	9	4	3	18	16	19
NECNQMCLSTLMKCD	AATGAATGTAATCAAATGTGCTTGTCAACTCTTATGAAGTGTGAT	0	NECNQMCLSTLMKCD	0	0	1	19	14	51	38	10	109	32	11	80	20	9	46	16	40	25	50	39	53	4	33	2	53	15	45	52	20	82	30	9	21	72	16	54
ECNQMCLSTLMKCDH	GAATGCAATCAAATGTGTTTAAGCACCCTAATGAAATGTGATCAT	0	ECNQMCLSTLMKCDH	0	0	0	24	13	23	51	16	46	46	5	24	21	3	10	22	29	35	60	61	37	8	20	0	34	35	26	35	23	58	15	8	7	40	19	51
CNQMCLSTLMKCDHC	TGTAATCAAATGTGCCTTTCAACGTTGATGAAATGTGATCACTGT	0	CNQMCLSTLMKCDHC	0	0	0	12	0	24	30	4	38	18	0	17	2	0	9	16	17	23	35	11	29	7	17	1	10	4	11	38	12	57	8	0	5	12	3	21
NQMCLSTLMKCDHCG	AATCAAATGTGTCTTAGTACCTTAATGAAATGCGACCATTGTGGT	0	NQMCLSTLMKCDHCG	0	0	1	6	9	7	15	17	17	11	13	9	4	3	1	29	24	26	32	15	37	9	30	1	18	7	15	26	10	57	10	1	12	27	0	27
QMCLSTLMKCDHCGE	CAAATGTGCCTTTCAACATTGATGAAGTGTGATCACTGCGGAGAA	0	QMCLSTLMKCDHCGE	0	0	0	1	16	20	0	19	9	0	13	3	2	5	1	13	23	18	24	43	8	13	30	1	15	11	1	28	27	8	2	3	2	12	14	2
MCLSTLMKCDHCGET	ATGTGTTTGTCAACATTAATGAAATGTGACCACTGCGGAGAAACT	0	MCLSTLMKCDHCGET	1	0	0	0	2	0	0	3	0	0	0	0	0	0	0	11	19	9	6	8	0	3	9	4	0	0	0	4	2	4	1	0	0	0	0	1
CLSTLMKCDHCGETS	TGCCTTTCAACTTTGATGAAGTGTGACCATTGCGGCGAGACTTCC	0	CLSTLMKCDHCGETS	0	0	0	0	4	0	0	1	0	0	0	0	1	0	0	13	22	10	10	5	0	3	8	1	6	1	0	9	10	0	0	1	0	4	0	0
LSTLMKCDHCGETSW	TTGTCCACCTTGATGAAGTGCGATCACTGTGGTGAAACGAGCTGG	0	LSTLMKCDHCGETSW	0	0	0	0	0	0	0	0	0	0	0	0	0	0	0	12	25	23	10	7	3	4	14	0	1	1	1	6	1	5	0	0	0	3	0	1
STLMKCDHCGETSWQ	AGCACACTTATGAAATGTGATCATTGCGGCGAGACATCCTGGCAA	0	STLMKCDHCGETSWQ	0	0	0	4	0	9	24	3	19	39	0	16	11	0	6	9	12	10	9	12	8	1	11	0	11	0	7	6	2	12	5	0	6	14	2	8
TLMKCDHCGETSWQT	ACACTCATGAAATGTGACCACTGCGGCGAAACAAGTTGGCAGACG	0	TLMKCDHCGETSWQT	0	0	0	14	0	6	26	0	10	14	0	7	0	0	0	9	20	16	23	8	14	5	11	1	17	1	7	22	14	32	8	0	2	20	1	12
LMKCDHCGETSWQTG	TTAATGAAATGTGATCATTGCGGCGAAACATCTTGGCAAACAGGA	0	LMKCDHCGETSWQTG	0	0	0	15	7	8	29	2	18	26	0	6	13	0	0	25	39	25	51	14	8	9	25	2	42	3	3	32	9	15	18	0	0	51	4	5
MKCDHCGETSWQTGD	ATGAAATGTGACCACTGTGGAGAAACTTCCTGGCAAACAGGAGAC	0	MKCDHCGETSWQTGD	0	0	0	0	0	2	0	0	0	0	0	0	0	0	0	9	16	12	3	13	0	10	12	0	2	0	0	14	16	0	0	0	0	3	0	0
KCDHCGETSWQTGDF	AAATGTGATCATTGCGGTGAAACATCATGGCAAACTGGAGACTTT	0	KCDHCGETSWQTGDF	0	0	0	1	0	0	0	0	0	0	0	0	0	0	0	13	12	10	9	5	0	4	19	0	3	0	0	8	3	2	3	0	0	3	2	0
CDHCGETSWQTGDFV	TGTGACCATTGCGGTGAAACCTCTTGGCAGACCGGTGATTTTGTT	0	CDHCGETSWQTGDFV	0	0	0	2	2	12	15	0	6	4	1	5	4	0	4	16	21	16	35	15	7	12	26	0	3	5	1	14	14	16	1	1	0	11	1	2
DHCGETSWQTGDFVK	GATCATTGTGGTGAAACGTCATGGCAGACGGGTGATTTTGTCAAA	0	DHCGETSWQTGDFVK	0	0	1	13	2	3	37	11	4	15	3	1	4	1	4	20	31	26	38	23	40	10	21	2	21	6	8	35	15	56	10	2	6	20	5	9
HCGETSWQTGDFVKA	CATTGTGGTGAGACGAGCTGGCAAACTGGTGATTTTGTCAAGGCC	0	HCGETSWQTGDFVKA	0	0	0	1	6	1	4	4	3	1	0	1	0	0	0	5	8	9	14	3	0	3	13	0	7	0	0	4	3	0	1	1	0	6	2	0
CGETSWQTGDFVKAT	TGTGGTGAAACTTCATGGCAAACTGGTGATTTCGTAAAGGCAACT	0	CGETSWQTGDFVKAT	0	0	0	5	18	0	9	8	0	5	2	0	0	1	0	16	27	23	29	8	7	11	22	0	20	1	1	21	5	6	4	1	0	20	3	3
GETSWQTGDFVKATC	GGAGAAACGTCCTGGCAGACAGGCGATTTCGTGAAAGCCACCTGC	0	GETSWQTGDFVKATC	0	0	0	1	9	12	4	13	30	5	6	23	10	5	6	3	4	11	14	10	18	0	3	0	37	8	11	10	9	15	35	8	3	17	3	8
ETSWQTGDFVKATCE	GAAACATCATGGCAGACAGGCGATTTTGTAAAAGCTACTTGTGAA	0	ETSWQTGDFVKATCE	2	1	0	19	38	26	71	77	65	132	112	78	112	82	50	21	27	22	35	76	24	0	27	1	66	42	27	5	23	33	91	42	10	30	46	15
TSWQTGDFVKATCEF	ACTTCTTGGCAAACAGGGGATTTCGTCAAGGCGACATGTGAATTT	0	TSWQTGDFVKATCEF	0	0	0	22	47	43	81	104	107	146	102	133	132	55	68	24	46	26	111	128	75	5	19	0	153	73	75	25	48	99	174	65	52	87	81	76
SWQTGDFVKATCEFC	TCTTGGCAAACAGGAGATTTTGTTAAGGCCACATGTGAGTTTTGT	0	SWQTGDFVKATCEFC	0	0	1	21	29	13	58	61	32	85	42	13	53	12	4	12	18	17	58	43	12	3	20	0	86	17	4	31	15	22	55	17	2	55	25	11
WQTGDFVKATCEFCG	TGGCAAACAGGTGACTTCGTTAAAGCCACATGCGAGTTCTGCGGC	0	WQTGDFVKATCEFCG	0	0	0	8	8	9	24	8	24	44	11	16	33	2	3	6	22	16	37	23	15	2	8	1	42	11	8	15	11	41	23	2	6	38	7	20
QTGDFVKATCEFCGT	CAAACTGGTGACTTTGTAAAAGCGACATGTGAGTTTTGTGGCACT	0	QTGDFVKATCEFCGT	0	0	0	12	10	6	27	14	16	56	22	14	43	4	3	11	13	11	34	16	15	0	10	0	45	6	5	12	19	21	47	5	6	31	17	20
TGDFVKATCEFCGTE	ACTGGTGATTTCGTCAAAGCTACGTGCGAATTCTGTGGTACTGAG	0	TGDFVKATCEFCGTE	0	0	0	38	11	26	79	16	49	131	5	18	88	5	2	17	25	19	59	41	31	1	27	1	93	6	14	24	18	54	72	3	3	54	5	29
GDFVKATCEFCGTEN	GGTGACTTCGTGAAAGCCACATGCGAGTTTTGTGGGACAGAAAAT	0	GDFVKATCEFCGTEN	0	0	3	35	16	22	122	36	33	171	16	28	141	4	12	24	26	25	65	40	9	9	28	0	75	7	2	29	17	12	70	5	1	62	18	4
DFVKATCEFCGTENL	GATTTTGTTAAAGCGACCTGTGAGTTCTGCGGTACCGAGAATCTT	0	DFVKATCEFCGTENL	0	0	0	12	2	4	70	1	11	85	1	12	44	1	1	23	25	16	40	7	13	1	14	0	53	6	4	25	2	35	54	0	0	47	8	11
FVKATCEFCGTENLT	TTTGTTAAAGCTACGTGTGAATTTTGTGGCACCGAAAACTTGACC	0	FVKATCEFCGTENLT	0	0	0	5	3	0	11	0	0	7	0	1	0	0	0	1	11	6	6	11	0	5	6	0	2	0	0	6	5	0	0	0	0	2	1	0
VKATCEFCGTENLTK	GTTAAAGCAACGTGTGAATTCTGTGGAACAGAAAATTTAACTAAG	0	VKATCEFCGTENLTK	0	0	0	0	5	3	3	1	1	0	0	0	0	0	0	15	27	17	13	13	1	11	14	0	3	1	0	14	4	1	1	0	0	8	0	0
KATCEFCGTENLTKE	AAAGCGACATGTGAATTTTGTGGTACGGAAAACTTAACCAAGGAA	0	KATCEFCGTENLTKE	0	0	0	2	0	0	8	0	0	1	0	0	0	1	0	13	18	21	19	16	6	8	15	0	3	4	0	8	6	7	2	2	1	10	3	4
ATCEFCGTENLTKEG	GCAACCTGTGAATTCTGTGGTACAGAAAACTTGACAAAAGAGGGC	0	ATCEFCGTENLTKEG	0	0	0	6	0	0	1	0	0	0	0	0	0	0	0	19	21	18	30	8	9	9	21	0	6	1	2	24	7	16	1	0	0	8	1	0
TCEFCGTENLTKEGA	ACTTGCGAATTCTGTGGTACTGAAAATCTAACGAAAGAAGGAGCT	0	TCEFCGTENLTKEGA	0	0	0	0	0	5	0	0	3	0	0	0	0	0	0	9	14	18	11	10	15	9	26	1	7	1	2	16	7	26	0	0	0	10	3	2
CEFCGTENLTKEGAT	TGTGAATTTTGCGGTACAGAAAATTTGACAAAGGAAGGCGCTACT	0	CEFCGTENLTKEGAT	0	0	0	0	0	9	0	0	0	2	0	1	0	0	0	11	21	8	19	2	1	2	12	0	5	1	2	7	4	9	2	2	0	7	2	2
EFCGTENLTKEGATT	GAATTCTGCGGCACCGAAAACCTAACAAAGGAGGGAGCAACCACC	0	EFCGTENLTKEGATT	0	0	0	0	0	0	0	0	0	0	0	0	0	0	0	0	0	0	2	0	0	0	0	0	1	0	0	3	0	0	2	0	0	2	0	0
FCGTENLTKEGATTC	TTTTGTGGGACGGAAAATTTAACAAAGGAAGGTGCCACCACGTGT	0	FCGTENLTKEGATTC	0	0	0	0	0	0	0	0	0	0	0	0	0	1	0	5	4	5	5	1	0	1	7	0	1	0	0	5	0	0	0	0	0	0	0	0
CGTENLTKEGATTCG	TGTGGGACAGAAAATTTAACAAAAGAGGGAGCCACAACATGTGGT	0	CGTENLTKEGATTCG	0	0	0	0	0	0	2	0	1	0	0	0	0	0	0	4	6	9	5	6	3	8	6	0	0	0	2	2	2	5	0	0	0	2	0	0
GTENLTKEGATTCGY	GGTACTGAGAATTTAACCAAAGAAGGGGCAACTACGTGTGGTTAT	0	GTENLTKEGATTCGY	0	0	0	2	2	13	3	0	24	3	0	6	2	0	3	14	15	15	14	19	12	4	12	0	8	0	3	25	12	21	2	0	0	9	6	9
TENLTKEGATTCGYL	ACGGAAAACCTGACCAAAGAAGGCGCGACCACTTGTGGGTACTTG	0	TENLTKEGATTCGYL	0	0	0	5	0	14	17	3	15	8	2	3	4	0	2	13	17	11	23	25	5	6	22	1	8	9	6	22	17	14	8	6	2	12	4	4
ENLTKEGATTCGYLP	GAAAATCTTACGAAGGAGGGAGCAACTACATGTGGGTACCTTCCA	0	ENLTKEGATTCGYLP	1	0	0	12	4	3	33	7	3	15	1	1	2	1	0	11	23	17	25	14	24	4	16	0	7	4	5	14	14	34	4	1	2	18	4	16
NLTKEGATTCGYLPQ	AATCTTACTAAAGAAGGTGCCACTACGTGTGGATATCTTCCCCAA	0	NLTKEGATTCGYLPQ	0	0	0	11	5	10	22	13	14	21	6	7	0	3	0	17	23	21	29	35	10	12	20	3	15	10	2	30	16	22	4	6	0	18	4	5
LTKEGATTCGYLPQN	TTAACTAAGGAAGGGGCGACAACTTGTGGATATCTACCCCAAAAC	0	LTKEGATTCGYLPQN	0	0	0	8	1	8	12	9	14	12	0	2	1	0	3	12	15	11	20	20	2	6	16	0	7	10	0	17	17	1	2	1	2	6	7	1
TKEGATTCGYLPQNA	ACTAAAGAAGGTGCCACGACGTGTGGTTACTTGCCTCAGAATGCA	0	TKEGATTCGYLPQNA	0	0	0	11	6	15	34	4	11	27	1	3	6	1	1	25	37	26	56	14	12	15	32	0	11	6	4	46	12	24	8	1	1	50	9	7
KEGATTCGYLPQNAV	AAGGAAGGTGCTACTACTTGTGGCTATTTACCACAAAATGCTGTG	0	KEGATTCGYLPQNAV	0	1	0	22	13	11	42	16	13	111	8	3	99	3	1	24	28	35	65	27	10	2	30	3	102	7	3	21	28	28	132	4	2	56	17	7
EGATTCGYLPQNAVV	GAAGGTGCCACTACTTGTGGATATTTGCCACAAAATGCCGTCGTC	0	EGATTCGYLPQNAVV	0	0	0	7	11	0	17	10	0	38	3	0	48	1	0	9	9	16	33	13	2	0	14	1	58	3	5	5	7	4	68	1	2	19	4	6
GATTCGYLPQNAVVK	GGAGCCACTACATGTGGTTACTTGCCACAAAACGCTGTTGTGAAA	0	GATTCGYLPQNAVVK	0	1	0	8	6	5	12	10	3	5	4	0	1	1	0	15	17	19	14	11	8	1	9	1	12	1	4	12	9	15	1	1	0	14	2	0
ATTCGYLPQNAVVKI	GCTACCACTTGTGGTTATTTGCCCCAAAACGCGGTCGTGAAAATT	0	ATTCGYLPQNAVVKI	0	0	0	2	0	2	7	0	10	3	0	6	0	0	1	14	11	15	15	4	11	6	3	0	2	0	6	12	4	22	1	1	0	7	2	3
TTCGYLPQNAVVKIY	ACTACCTGCGGCTACTTACCTCAAAATGCTGTAGTGAAAATTTAT	0	TTCGYLPQNAVVKIY	0	0	0	8	0	5	4	0	5	1	0	1	2	0	0	24	18	12	20	4	3	12	16	0	4	2	2	17	4	18	2	1	0	6	1	0
TCGYLPQNAVVKIYC	ACTTGTGGCTACCTTCCACAGAATGCAGTAGTTAAGATCTACTGC	0	TCGYLPQNAVVKIYC	0	0	0	1	5	9	0	7	10	0	5	8	0	4	13	5	18	7	5	6	4	5	8	1	5	2	6	13	7	17	1	0	0	6	2	8
CGYLPQNAVVKIYCP	TGCGGTTATTTACCACAAAATGCTGTTGTTAAGATATACTGCCCA	0	CGYLPQNAVVKIYCP	0	0	1	12	11	10	7	16	30	6	10	23	1	6	30	13	19	7	9	37	28	5	9	0	4	8	44	12	12	23	2	6	34	9	14	37
GYLPQNAVVKIYCPA	GGCTATCTCCCACAGAATGCGGTTGTAAAGATTTACTGCCCAGCG	0	GYLPQNAVVKIYCPA	0	0	0	3	11	8	2	16	43	0	10	51	1	5	75	8	4	7	12	9	14	8	7	1	2	4	15	8	11	4	1	4	23	3	10	9
YLPQNAVVKIYCPAC	TATTTACCTCAGAATGCAGTTGTGAAAATTTATTGCCCAGCATGT	0	YLPQNAVVKIYCPAC	0	0	0	1	10	14	1	27	60	1	11	67	0	10	34	22	24	23	18	27	40	7	13	0	2	6	38	26	19	38	3	5	38	4	14	52
LPQNAVVKIYCPACH	TTACCGCAGAATGCTGTTGTTAAAATATATTGCCCAGCATGCCAC	0	LPQNAVVKIYCPACH	0	0	0	1	0	10	3	0	21	0	0	20	0	0	34	6	9	16	2	5	5	1	5	0	0	2	6	8	3	8	0	1	5	2	1	9
PQNAVVKIYCPACHN	CCGCAGAATGCAGTGGTAAAGATCTACTGCCCTGCCTGCCATAAT	0	PQNAVVKIYCPACHN	0	0	0	10	8	28	10	5	64	6	0	82	0	1	61	24	23	22	30	19	30	8	12	0	4	4	28	23	15	27	1	3	13	18	6	20
QNAVVKIYCPACHNS	CAGAACGCAGTAGTTAAGATTTATTGCCCTGCATGCCACAATTCT	0	QNAVVKIYCPACHNS	0	0	0	6	12	24	16	26	90	6	14	83	2	7	82	27	16	16	21	9	33	6	19	1	6	6	21	28	9	21	2	5	17	9	4	14
NAVVKIYCPACHNSE	AACGCAGTAGTCAAGATTTACTGTCCAGCATGTCATAATTCAGAA	0	NAVVKIYCPACHNSE	0	0	0	3	4	11	5	9	40	0	1	30	0	1	34	15	12	11	12	10	36	10	17	0	5	2	54	18	12	47	1	1	50	5	4	54
AVVKIYCPACHNSEV	GCAGTAGTAAAAATCTATTGCCCTGCTTGTCATAACTCGGAAGTA	0	AVVKIYCPACHNSEV	0	0	0	0	18	10	0	20	34	0	28	26	0	18	16	23	20	18	18	19	22	15	18	1	2	6	23	16	10	38	1	4	14	4	9	24
VVKIYCPACHNSEVG	GTCGTTAAGATTTATTGCCCGGCTTGTCATAACTCCGAAGTTGGG	0	VVKIYCPACHNSEVG	0	0	0	2	1	0	3	1	2	8	0	1	2	0	0	28	27	33	1	8	14	8	21	0	2	1	4	0	9	29	0	1	1	0	1	3
VKIYCPACHNSEVGP	GTCAAAATATATTGTCCTGCTTGCCATAATTCAGAGGTTGGTCCA	0	VKIYCPACHNSEVGP	0	0	0	0	0	5	0	0	2	0	0	1	1	0	0	11	18	14	10	4	2	2	14	1	0	0	0	7	2	9	0	1	0	1	0	0
KIYCPACHNSEVGPE	AAGATTTATTGTCCAGCATGTCATAATTCTGAAGTAGGTCCTGAA	0	KIYCPACHNSEVGPE	0	0	0	1	1	0	3	1	0	1	1	0	0	0	0	13	21	13	6	7	2	10	12	0	1	2	2	13	11	1	1	0	0	4	2	2
IYCPACHNSEVGPEH	ATATACTGTCCTGCTTGTCACAATTCTGAGGTTGGGCCCGAACAT	0	IYCPACHNSEVGPEH	0	0	0	2	0	1	6	0	0	1	0	0	0	0	0	23	34	28	15	15	5	8	17	2	3	2	2	12	8	11	3	0	0	3	0	3
YCPACHNSEVGPEHS	TATTGCCCTGCTTGTCATAATTCTGAAGTTGGTCCTGAACATAGT	0	YCPACHNSEVGPEHS	0	0	0	3	1	0	6	0	1	0	0	0	0	0	0	27	31	27	28	12	9	13	31	1	11	0	0	21	9	19	4	0	0	6	0	2
CPACHNSEVGPEHSL	TGTCCTGCTTGTCATAATAGCGAGGTAGGTCCAGAACACTCCTTG	0	CPACHNSEVGPEHSL	0	0	0	13	8	17	37	15	75	47	12	58	7	1	37	19	28	16	34	17	32	3	20	0	30	2	34	22	9	41	8	2	37	38	9	49
PACHNSEVGPEHSLA	CCTGCTTGCCACAATTCTGAGGTGGGTCCAGAACATTCTTTAGCA	0	PACHNSEVGPEHSLA	0	0	0	0	2	11	3	0	21	5	0	22	0	0	2	12	10	10	18	6	12	2	6	1	8	3	12	17	3	29	2	1	2	7	1	7
ACHNSEVGPEHSLAE	GCTTGCCATAATTCAGAGGTCGGACCCGAACACTCATTGGCAGAA	0	ACHNSEVGPEHSLAE	0	0	0	1	0	0	1	0	3	0	0	0	0	0	0	6	16	16	10	10	6	4	3	0	2	0	0	7	14	10	0	1	1	1	0	1
CHNSEVGPEHSLAEY	TGCCATAATAGTGAAGTTGGCCCTGAGCATTCATTGGCTGAGTAC	0	CHNSEVGPEHSLAEY	0	0	0	0	3	6	10	4	19	7	0	10	3	0	0	12	30	25	23	24	27	4	17	1	10	2	10	30	22	35	3	1	3	24	6	9
HNSEVGPEHSLAEYH	CACAATAGTGAAGTTGGCCCGGAACACTCTTTGGCAGAATATCAT	0	HNSEVGPEHSLAEYH	0	0	0	0	1	6	0	0	17	0	0	9	0	0	0	15	15	12	8	3	15	3	13	0	1	0	2	16	1	23	0	2	6	4	0	8
NSEVGPEHSLAEYHN	AATTCTGAAGTGGGTCCTGAACACTCATTAGCTGAATACCATAAT	0	NSEVGPEHSLAEYHN	0	0	0	0	0	9	0	0	35	0	0	13	0	0	0	11	21	11	14	23	22	9	11	1	4	3	10	15	14	59	1	2	8	2	8	23
SEVGPEHSLAEYHNE	TCCGAAGTTGGTCCGGAACATAGCCTAGCTGAATACCATAATGAG	0	SEVGPEHSLAEYHNE	0	0	0	3	11	25	0	25	53	0	10	38	1	13	23	13	22	20	15	51	34	5	12	1	4	32	26	13	29	33	0	24	6	10	35	33
EVGPEHSLAEYHNES	GAGGTGGGGCCAGAGCATTCTTTGGCTGAATACCATAACGAATCA	0	EVGPEHSLAEYHNES	0	0	0	8	6	1	9	5	1	7	1	4	0	1	1	25	38	26	56	28	15	10	19	0	22	18	13	21	28	55	8	5	6	28	22	15
VGPEHSLAEYHNESG	GTTGGACCCGAGCATAGTCTCGCCGAATATCATAATGAATCTGGA	0	VGPEHSLAEYHNESG	0	0	0	19	5	13	33	8	24	58	8	6	17	3	0	15	20	24	49	25	16	4	14	2	50	9	6	18	24	22	45	5	2	39	17	4
GPEHSLAEYHNESGL	GGGCCCGAGCATTCACTTGCTGAATATCATAATGAGTCAGGATTG	0	GPEHSLAEYHNESGL	0	0	0	19	20	11	66	25	23	123	28	27	85	25	6	15	22	21	42	27	32	3	7	2	83	34	17	22	21	47	99	14	13	48	22	29
PEHSLAEYHNESGLK	CCCGAGCATAGCCTTGCAGAATATCATAACGAGTCTGGGTTGAAA	0	PEHSLAEYHNESGLK	0	0	0	13	48	21	49	86	51	83	93	46	66	55	30	19	19	18	53	47	36	1	23	1	71	24	26	14	24	42	105	17	22	27	14	36
EHSLAEYHNESGLKT	GAGCATTCATTAGCCGAATACCACAATGAATCAGGTCTAAAGACA	0	EHSLAEYHNESGLKT	0	0	0	36	22	22	93	49	93	166	94	80	102	68	32	22	38	24	67	55	52	2	20	1	93	37	62	28	23	59	89	49	58	38	46	84
HSLAEYHNESGLKTI	CACTCCTTGGCTGAATACCATAATGAAAGTGGGCTCAAAACCATC	0	HSLAEYHNESGLKTI	0	0	0	4	18	5	2	53	4	10	38	12	4	26	1	14	12	9	28	16	20	0	8	0	28	12	5	6	6	30	53	10	6	17	11	27
SLAEYHNESGLKTIL	TCTCTTGCAGAATACCACAATGAGAGTGGTCTTAAAACCATACTA	0	SLAEYHNESGLKTIL	0	0	0	10	14	5	33	27	16	45	46	17	40	46	4	10	7	12	27	36	52	3	10	0	57	20	39	10	8	45	46	17	28	22	14	41
LAEYHNESGLKTILR	TTAGCTGAATACCACAATGAGTCCGGACTAAAAACCATTCTAAGA	0	LAEYHNESGLKTILR	0	1	2	19	3	10	56	2	12	115	0	6	69	1	3	9	17	19	31	16	14	2	11	1	42	1	9	11	7	23	38	0	3	11	8	12
AEYHNESGLKTILRK	GCAGAATATCACAACGAGTCGGGTTTGAAGACTATTCTCAGAAAA	0	AEYHNESGLKTILRK	0	0	0	20	24	20	41	23	27	80	24	10	57	18	2	19	34	24	64	40	12	3	30	1	81	13	7	23	21	15	82	2	2	58	16	12
EYHNESGLKTILRKG	GAATATCATAACGAGAGCGGACTTAAGACTATTTTAAGAAAAGGG	0	EYHNESGLKTILRKG	0	0	2	22	2	3	81	6	4	129	3	2	100	1	1	14	19	14	58	29	3	3	17	0	71	21	2	26	19	15	62	4	0	47	15	6
YHNESGLKTILRKGG	TATCATAACGAATCAGGGTTGAAAACTATTTTGAGGAAAGGCGGG	0	YHNESGLKTILRKGG	0	0	1	0	18	14	0	42	13	0	51	10	0	16	1	16	22	19	20	42	16	10	23	4	0	22	3	17	15	30	2	15	1	5	25	7
HNESGLKTILRKGGR	CATAATGAATCAGGCCTGAAAACTATTCTGAGAAAGGGTGGTCGC	0	HNESGLKTILRKGGR	0	0	0	0	49	18	0	104	20	2	234	15	0	226	3	19	24	17	8	98	4	5	9	0	3	106	2	5	15	21	1	175	3	6	59	6
NESGLKTILRKGGRT	AATGAGAGCGGTTTGAAGACAATTCTCCGTAAAGGTGGCCGTACC	0	NESGLKTILRKGGRT	0	0	0	0	5	5	0	14	17	0	32	15	0	45	15	5	10	7	0	32	5	4	6	0	0	38	1	1	10	2	0	60	4	0	22	3
ESGLKTILRKGGRTI	GAAAGCGGACTGAAAACGATACTAAGGAAAGGTGGAAGAACAATA	0	ESGLKTILRKGGRTI	0	1	0	2	80	5	2	237	9	1	374	15	5	538	21	25	35	21	15	197	32	18	20	4	0	193	23	8	41	32	1	288	39	3	87	20
SGLKTILRKGGRTIA	TCAGGTTTGAAAACAATACTCCGTAAAGGGGGCCGTACTATAGCT	0	SGLKTILRKGGRTIA	0	1	0	0	29	5	2	76	8	0	81	8	0	48	6	15	13	13	3	39	0	4	13	1	0	34	0	0	18	0	1	47	0	0	22	1
GLKTILRKGGRTIAF	GGGTTGAAGACAATTCTGAGAAAAGGGGGTAGGACAATTGCCTTT	0	GLKTILRKGGRTIAF	0	0	0	1	2	2	1	1	1	0	0	0	0	0	1	28	21	17	8	4	3	11	25	1	2	0	2	6	2	3	0	0	1	2	2	4
LKTILRKGGRTIAFG	TTAAAGACTATTTTACGGAAGGGTGGCAGAACTATAGCTTTTGGT	0	LKTILRKGGRTIAFG	0	0	0	1	1	5	0	0	10	0	0	8	0	0	2	15	29	25	0	3	0	13	18	0	0	1	2	1	1	2	0	0	1	1	2	3
KTILRKGGRTIAFGG	AAAACCATACTGAGAAAAGGTGGTAGGACAATAGCATTCGGAGGT	0	KTILRKGGRTIAFGG	0	0	0	3	41	2	5	108	9	2	186	8	3	246	18	18	19	8	8	110	6	8	18	0	1	149	5	5	28	8	2	199	12	2	59	4
TILRKGGRTIAFGGC	ACTATCCTAAGGAAAGGTGGACGCACTATTGCATTCGGTGGCTGT	0	TILRKGGRTIAFGGC	0	0	0	7	48	13	8	110	11	9	214	16	2	258	16	17	29	32	15	135	19	14	21	1	5	133	10	11	28	30	3	183	10	7	68	11
ILRKGGRTIAFGGCV	ATTTTAAGAAAGGGTGGAAGAACAATTGCTTTCGGAGGCTGTGTC	0	ILRKGGRTIAFGGCV	0	0	0	2	0	2	1	0	4	1	0	1	0	0	0	20	20	17	4	8	1	5	15	0	0	1	0	5	5	0	0	1	0	1	1	0
LRKGGRTIAFGGCVF	TTGCGTAAGGGGGGCCGAACTATCGCATTCGGAGGATGTGTCTTC	0	LRKGGRTIAFGGCVF	0	0	0	2	4	5	3	5	2	2	1	0	0	0	0	15	14	16	4	4	0	9	11	0	2	1	0	2	5	0	1	0	0	0	1	0
RKGGRTIAFGGCVFS	AGAAAAGGGGGTCGTACAATTGCCTTCGGTGGTTGCGTCTTCTCT	0	RKGGRTIAFGGCVFS	0	0	0	17	0	6	27	0	6	6	1	5	0	1	5	30	30	26	30	24	49	14	23	1	4	4	19	15	14	86	0	3	1	1	11	22
KGGRTIAFGGCVFSY	AAAGGTGGTAGAACAATTGCTTTTGGTGGTTGCGTCTTTAGTTAT	0	KGGRTIAFGGCVFSY	0	0	0	7	5	7	16	3	11	13	2	8	0	1	3	20	20	16	18	30	26	6	16	1	5	12	7	28	27	47	4	2	2	15	17	20
GGRTIAFGGCVFSYV	GGTGGTCGAACCATTGCATTTGGTGGCTGTGTTTTTAGCTACGTT	0	GGRTIAFGGCVFSYV	0	0	0	21	23	12	29	34	17	18	23	9	2	11	3	21	30	28	38	54	54	15	22	2	19	13	33	35	37	102	6	6	16	22	15	45
GRTIAFGGCVFSYVG	GGCAGGACTATTGCCTTTGGGGGTTGCGTATTTTCGTATGTAGGT	0	GRTIAFGGCVFSYVG	0	0	1	4	10	25	9	4	57	1	1	32	0	0	8	26	40	38	32	46	39	7	29	0	7	21	26	47	33	82	2	3	6	17	12	38
RTIAFGGCVFSYVGC	CGTACCATTGCCTTTGGTGGGTGCGTGTTCAGCTACGTTGGATGC	0	RTIAFGGCVFSYVGC	0	0	0	0	3	6	8	1	14	2	2	8	0	2	2	11	24	23	21	16	34	8	26	1	2	8	12	13	26	87	2	1	5	7	11	34
TIAFGGCVFSYVGCH	ACCATTGCATTTGGTGGTTGCGTCTTTTCTTATGTCGGATGTCAC	0	TIAFGGCVFSYVGCH	0	0	0	1	0	1	3	0	0	1	0	0	0	0	0	15	15	7	6	6	19	5	9	0	0	0	0	7	2	19	0	0	0	1	0	0
IAFGGCVFSYVGCHN	ATTGCTTTTGGTGGATGTGTATTTTCCTATGTGGGTTGTCATAAT	0	IAFGGCVFSYVGCHN	0	0	1	14	7	2	10	3	2	5	0	0	1	0	0	10	24	23	17	8	1	8	21	0	13	0	1	10	3	5	7	0	1	6	0	0
AFGGCVFSYVGCHNK	GCATTCGGTGGATGTGTATTCTCATATGTTGGTTGTCATAATAAA	0	AFGGCVFSYVGCHNK	0	1	0	7	9	7	12	5	3	11	2	0	1	1	0	15	19	20	23	22	5	5	12	2	7	0	1	13	6	9	5	0	0	21	0	0
FGGCVFSYVGCHNKC	TTCGGTGGATGTGTGTTTTCTTATGTCGGATGCCATAACAAATGC	0	FGGCVFSYVGCHNKC	0	0	0	3	0	0	8	0	0	4	0	0	0	0	0	6	12	8	20	6	0	2	7	0	12	0	0	11	2	0	7	0	0	14	0	0
GGCVFSYVGCHNKCA	GGGGGTTGCGTGTTCAGCTACGTAGGTTGTCATAACAAGTGCGCA	0	GGCVFSYVGCHNKCA	0	0	0	1	9	11	15	13	21	18	7	5	0	4	4	10	16	15	26	15	6	1	15	0	19	8	1	16	12	7	10	0	0	32	4	2
GCVFSYVGCHNKCAY	GGATGTGTATTTAGCTATGTGGGGTGTCACAACAAGTGTGCTTAC	0	GCVFSYVGCHNKCAY	0	0	1	6	15	16	12	17	23	25	9	9	13	3	0	14	24	16	40	18	6	3	11	0	49	4	4	17	4	31	31	0	0	44	3	5
CVFSYVGCHNKCAYW	TGTGTCTTTTCGTACGTTGGTTGTCACAACAAGTGTGCGTACTGG	0	CVFSYVGCHNKCAYW	0	0	0	2	0	2	5	0	1	0	0	1	0	0	0	25	33	35	28	4	2	7	21	1	8	1	0	25	1	6	1	0	2	11	0	2
VFSYVGCHNKCAYWV	GTGTTTTCTTACGTAGGATGTCATAACAAGTGCGCCTACTGGGTT	0	VFSYVGCHNKCAYWV	0	0	0	3	0	0	2	0	0	1	0	0	0	0	0	7	19	7	5	2	0	6	11	0	1	0	0	7	0	0	0	0	0	0	0	0
FSYVGCHNKCAYWVP	TTTTCTTACGTAGGGTGTCACAATAAGTGCGCCTATTGGGTTCCG	0	FSYVGCHNKCAYWVP	0	0	0	7	0	1	17	0	1	21	0	0	15	0	0	8	17	10	12	4	3	1	5	0	17	2	0	10	5	2	12	0	0	11	0	2
SYVGCHNKCAYWVPR	TCATACGTGGGATGTCACAATAAGTGTGCATACTGGGTGCCACGA	0	SYVGCHNKCAYWVPR	0	1	0	16	2	0	31	6	3	50	9	2	66	1	0	9	15	4	25	23	0	0	2	0	34	7	0	1	15	0	46	9	1	12	11	2
YVGCHNKCAYWVPRA	TATGTAGGGTGTCACAACAAGTGTGCCTATTGGGTTCCCAGAGCG	0	YVGCHNKCAYWVPRA	0	0	0	13	3	7	44	1	4	58	0	0	42	0	0	20	13	23	45	24	1	2	18	2	55	3	2	26	27	8	65	8	1	34	12	2
VGCHNKCAYWVPRAS	GTAGGTTGTCATAACAAATGTGCGTATTGGGTGCCCAGAGCTAGT	0	VGCHNKCAYWVPRAS	0	0	0	20	9	7	32	7	6	13	6	4	10	1	0	16	33	19	31	88	10	4	23	0	8	33	3	21	42	25	3	28	1	17	41	11
GCHNKCAYWVPRASA	GGTTGTCATAATAAGTGTGCATATTGGGTACCAAGGGCCTCTGCT	0	GCHNKCAYWVPRASA	0	0	0	4	35	14	3	76	34	4	78	12	2	55	11	19	22	23	34	106	22	7	20	3	20	78	15	36	40	34	5	95	4	11	49	21
CHNKCAYWVPRASAN	TGTCATAATAAGTGTGCATATTGGGTGCCAAGGGCCTCTGCAAAT	0	CHNKCAYWVPRASAN	0	0	0	13	37	19	10	90	21	3	133	19	0	87	12	26	27	33	36	106	25	11	30	1	15	102	7	23	49	28	2	124	11	15	99	18
HNKCAYWVPRASANI	CATAACAAATGTGCTTATTGGGTCCCTAGGGCTTCAGCGAACATT	0	HNKCAYWVPRASANI	0	0	0	16	19	12	24	50	33	6	58	22	2	55	10	31	32	26	35	109	11	7	27	1	30	106	9	24	34	17	12	129	3	32	78	17
NKCAYWVPRASANIG	AATAAATGCGCATACTGGGTCCCTCGGGCCAGCGCCAACATCGGC	0	NKCAYWVPRASANIG	0	0	0	0	0	0	0	0	0	0	0	0	0	0	0	0	0	0	0	0	0	0	0	0	0	0	0	0	0	0	0	0	0	0	0	0
KCAYWVPRASANIGC	AAGTGTGCCTATTGGGTGCCAAGAGCCAGTGCAAATATAGGTTGT	0	KCAYWVPRASANIGC	1	0	0	13	48	1	16	86	6	10	91	3	4	88	1	18	29	24	31	94	7	16	21	1	11	82	7	27	34	16	3	82	2	12	48	5
CAYWVPRASANIGCN	TGTGCTTATTGGGTCCCGAGGGCTAGCGCAAATATTGGTTGTAAT	0	CAYWVPRASANIGCN	0	0	0	2	0	3	4	0	2	0	0	4	0	0	0	18	27	13	1	3	1	3	16	0	0	0	2	1	2	0	0	0	0	1	0	0
AYWVPRASANIGCNH	GCTTACTGGGTCCCTAGGGCAAGCGCTAATATTGGTTGCAATCAC	0	AYWVPRASANIGCNH	0	0	0	0	8	0	0	10	1	0	9	1	0	0	0	17	18	17	31	20	8	4	13	0	4	1	0	19	14	19	2	1	0	5	1	1
YWVPRASANIGCNHT	TACTGGGTACCAAGAGCGTCAGCTAATATTGGTTGTAACCATACC	0	YWVPRASANIGCNHT	0	0	0	0	0	0	0	0	0	0	0	0	0	0	0	1	1	4	4	2	1	1	0	0	2	0	1	0	2	1	0	0	0	1	0	0
WVPRASANIGCNHTG	TGGGTTCCTAGAGCATCAGCCAACATTGGCTGTAACCACACGGGA	0	WVPRASANIGCNHTG	0	0	0	2	0	2	1	0	2	2	0	1	0	0	0	19	19	10	16	9	6	6	14	1	3	0	1	11	4	12	2	1	0	5	0	0
VPRASANIGCNHTGV	GTACCTAGAGCCTCTGCGAATATTGGCTGTAACCATACAGGGGTT	0	VPRASANIGCNHTGV	0	0	0	6	9	5	13	4	8	4	1	1	1	1	0	13	29	26	29	11	16	11	23	0	4	2	1	25	10	31	2	0	0	10	1	7
PRASANIGCNHTGVV	CCGCGTGCATCCGCTAATATTGGATGTAACCATACAGGGGTGGTG	0	PRASANIGCNHTGVV	0	0	0	0	3	9	0	0	9	0	0	6	0	0	1	4	17	8	3	7	0	4	6	0	1	0	0	5	8	0	0	0	0	4	2	0
RASANIGCNHTGVVG	AGGGCATCAGCTAATATAGGATGCAATCACACAGGTGTTGTCGGA	0	RASANIGCNHTGVVG	0	0	0	3	0	1	2	0	2	1	0	0	0	0	0	7	14	7	13	10	1	3	7	1	2	1	0	6	3	3	0	1	0	7	3	0
ASANIGCNHTGVVGE	GCATCTGCTAATATTGGATGTAATCATACAGGTGTAGTGGGTGAA	0	ASANIGCNHTGVVGE	0	0	0	5	0	0	16	0	4	5	0	1	3	0	2	23	31	25	22	14	12	6	20	2	2	2	3	19	9	38	1	0	0	5	0	0
SANIGCNHTGVVGEG	TCGGCTAATATTGGATGCAACCATACAGGCGTCGTGGGAGAGGGC	0	SANIGCNHTGVVGEG	0	0	0	0	1	1	5	0	0	1	0	1	2	0	0	8	9	14	6	8	2	2	2	0	1	2	0	4	7	5	1	0	0	4	0	0
ANIGCNHTGVVGEGS	GCCAACATTGGATGTAATCATACAGGGGTGGTTGGTGAAGGATCC	0	ANIGCNHTGVVGEGS	0	0	0	0	0	0	0	0	0	0	0	1	0	0	0	1	0	3	1	0	2	0	2	0	0	1	1	0	0	10	1	0	0	4	0	0
NIGCNHTGVVGEGSE	AACATTGGTTGTAATCATACCGGCGTTGTCGGTGAAGGTTCAGAA	0	NIGCNHTGVVGEGSE	1	0	2	16	4	16	63	5	62	65	1	34	32	1	13	39	31	19	65	24	24	5	19	1	67	2	22	38	15	52	35	0	12	65	3	25
IGCNHTGVVGEGSEG	ATTGGATGTAACCATACAGGGGTGGTTGGAGAAGGCAGCGAAGGT	0	IGCNHTGVVGEGSEG	0	0	0	0	0	1	0	0	1	0	0	1	0	0	0	4	14	11	9	7	15	1	8	0	1	1	2	5	5	30	1	0	0	0	1	3
GCNHTGVVGEGSEGL	GGGTGTAATCATACCGGTGTTGTGGGAGAAGGTTCCGAAGGTCTA	0	GCNHTGVVGEGSEGL	0	0	0	0	4	3	1	3	2	0	5	0	1	3	0	20	19	16	22	14	4	13	19	1	5	1	3	18	5	8	0	0	2	5	1	4
CNHTGVVGEGSEGLN	TGTAATCACACCGGTGTAGTCGGCGAAGGGTCAGAAGGTTTAAAC	0	CNHTGVVGEGSEGLN	0	0	0	4	0	3	6	0	4	3	0	2	0	0	1	14	12	11	11	9	2	6	10	0	11	0	0	16	5	2	1	0	0	4	0	0
NHTGVVGEGSEGLND	AACCACACTGGTGTTGTGGGTGAAGGTAGTGAAGGTCTAAATGAT	0	NHTGVVGEGSEGLND	0	0	0	0	0	0	0	0	0	0	0	0	0	0	1	27	41	44	19	20	16	14	32	0	5	0	3	11	16	45	0	0	1	4	3	2
HTGVVGEGSEGLNDN	CATACAGGTGTTGTTGGTGAAGGCTCCGAAGGACTAAATGACAAC	0	HTGVVGEGSEGLNDN	0	0	0	0	0	2	0	0	0	0	0	0	0	0	0	6	17	13	11	8	1	5	10	0	1	1	1	3	2	4	0	1	1	0	1	0
TGVVGEGSEGLNDNL	ACAGGTGTTGTTGGAGAAGGGTCAGAGGGTTTGAACGATAACCTT	0	TGVVGEGSEGLNDNL	0	0	0	3	0	0	2	0	0	2	0	0	1	0	0	14	40	27	22	7	3	7	16	0	2	1	0	15	6	7	2	0	0	6	0	1
GVVGEGSEGLNDNLL	GGAGTGGTTGGTGAAGGCTCGGAAGGGCTTAACGACAACTTACTT	0	GVVGEGSEGLNDNLL	0	0	0	1	0	0	0	0	0	0	0	0	0	0	0	14	28	26	13	4	5	9	17	0	3	1	1	16	6	8	0	0	0	3	4	2
VVGEGSEGLNDNLLE	GTCGTCGGTGAAGGTTCGGAGGGTTTGAATGATAATTTGCTAGAA	0	VVGEGSEGLNDNLLE	0	0	0	2	2	0	1	0	1	0	0	0	0	0	0	30	26	22	13	7	0	5	21	2	2	0	0	7	5	1	0	0	0	2	0	0
VGEGSEGLNDNLLEI	GTTGGTGAAGGATCTGAAGGATTGAATGATAATCTTTTGGAAATA	0	VGEGSEGLNDNLLEI	0	0	0	0	0	0	0	0	2	0	0	0	0	0	0	20	15	18	15	9	1	8	13	1	2	0	1	6	6	3	0	0	0	3	1	0
GEGSEGLNDNLLEIL	GGTGAAGGTTCCGAGGGTTTGAACGACAATTTACTTGAAATACTG	0	GEGSEGLNDNLLEIL	0	0	0	0	0	4	3	0	3	4	0	0	2	0	1	13	20	16	13	7	9	8	12	2	0	2	2	10	7	32	1	0	0	0	0	12
EGSEGLNDNLLEILQ	GAAGGTTCCGAGGGATTAAATGATAACTTGTTAGAAATATTACAA	0	EGSEGLNDNLLEILQ	1	0	0	3	0	2	1	0	3	1	0	3	0	0	0	6	12	10	4	3	9	9	15	0	1	3	6	8	4	10	1	0	4	3	1	4
GSEGLNDNLLEILQK	GGGTCGGAAGGCCTGAACGATAACCTTCTCGAAATTCTCCAGAAG	0	GSEGLNDNLLEILQK	0	0	0	0	1	13	0	0	21	0	0	11	1	0	5	15	24	18	19	17	13	5	14	1	3	0	2	16	5	28	0	0	1	2	0	11
SEGLNDNLLEILQKE	TCGGAAGGGCTGAATGACAATTTGTTAGAAATTCTTCAGAAAGAG	0	SEGLNDNLLEILQKE	0	0	0	2	0	2	2	1	2	5	0	3	1	0	0	12	8	16	9	20	11	12	15	0	3	1	4	5	14	6	0	0	6	2	3	6
EGLNDNLLEILQKEK	GAAGGATTGAACGATAACCTATTAGAAATATTACAGAAAGAAAAG	0	EGLNDNLLEILQKEK	0	0	0	0	3	3	0	5	6	0	0	10	0	3	0	14	18	7	10	5	11	7	14	0	2	0	2	4	7	31	0	0	1	2	0	9
GLNDNLLEILQKEKV	GGTCTTAATGACAATTTGTTGGAAATCCTCCAAAAAGAAAAAGTG	0	GLNDNLLEILQKEKV	0	0	1	5	0	16	7	0	33	1	0	10	0	1	1	15	21	15	19	12	5	13	15	0	1	0	0	12	8	16	0	0	0	2	0	0
LNDNLLEILQKEKVN	TTAAATGATAACTTATTAGAAATTTTACAAAAGGAAAAGGTTAAC	0	LNDNLLEILQKEKVN	0	0	0	11	2	6	10	1	7	11	1	9	10	0	1	5	15	7	17	11	11	8	8	0	22	2	0	14	4	15	8	0	1	22	1	4
NDNLLEILQKEKVNI	AATGATAATCTTTTGGAAATATTACAAAAGGAAAAGGTTAACATT	0	NDNLLEILQKEKVNI	0	1	0	6	28	23	40	51	31	43	65	30	21	23	13	24	20	10	32	34	13	5	14	1	38	26	17	14	13	27	30	21	17	38	30	26
DNLLEILQKEKVNIN	GACAACTTGTTAGAAATTCTACAAAAGGAAAAAGTTAATATTAAC	0	DNLLEILQKEKVNIN	0	0	0	0	0	0	9	0	1	0	0	1	0	0	0	12	10	8	14	5	7	5	7	0	7	2	4	9	4	11	2	0	1	7	4	5
NLLEILQKEKVNINI	AATTTGTTAGAGATATTGCAAAAGGAAAAAGTAAACATCAACATT	0	NLLEILQKEKVNINI	0	0	0	3	0	14	2	6	9	0	2	3	0	0	0	9	21	13	15	15	14	8	16	0	2	7	9	17	16	54	3	2	6	2	6	9
LLEILQKEKVNINIV	CTTTTAGAAATTTTACAGAAAGAGAAGGTCAATATTAATATTGTG	0	LLEILQKEKVNINIV	0	0	0	0	0	1	0	0	2	0	0	0	0	0	0	10	13	4	8	2	1	9	9	0	4	0	0	2	0	1	1	0	0	0	2	0
LEILQKEKVNINIVG	TTGGAGATCCTCCAAAAAGAGAAGGTTAATATTAACATTGTAGGT	0	LEILQKEKVNINIVG	1	0	0	8	6	1	36	22	1	37	9	1	9	1	0	13	10	20	33	29	25	2	10	0	28	9	10	17	8	44	6	12	4	36	21	27
EILQKEKVNINIVGD	GAAATTCTCCAGAAGGAAAAGGTCAATATAAATATCGTTGGTGAC	0	EILQKEKVNINIVGD	1	1	0	0	7	11	0	7	38	1	9	31	1	0	23	14	17	9	21	21	48	5	6	1	4	7	60	15	16	58	2	6	60	14	8	59
ILQKEKVNINIVGDF	ATACTTCAGAAAGAAAAGGTGAACATTAATATTGTAGGGGATTTT	0	ILQKEKVNINIVGDF	0	0	0	11	6	41	7	31	107	3	35	125	0	13	118	10	16	17	20	29	48	5	12	0	16	14	59	26	15	35	10	17	62	17	15	36
LQKEKVNINIVGDFK	CTTCAAAAAGAAAAAGTCAATATTAATATCGTTGGTGACTTTAAG	0	LQKEKVNINIVGDFK	0	0	0	0	24	28	0	71	69	2	63	82	0	30	73	16	14	17	12	40	37	9	12	1	4	23	42	12	20	23	1	18	56	6	31	22
QKEKVNINIVGDFKL	CAAAAAGAAAAAGTTAATATAAATATCGTTGGGGATTTCAAGTTG	0	QKEKVNINIVGDFKL	0	0	0	2	1	8	1	0	5	0	0	8	0	0	1	9	11	8	6	9	6	4	7	0	0	0	2	6	4	22	2	0	0	4	1	3
KEKVNINIVGDFKLN	AAGGAGAAGGTGAATATTAATATAGTCGGAGATTTCAAGTTGAAC	0	KEKVNINIVGDFKLN	0	1	0	0	5	6	0	12	9	0	2	6	0	1	0	6	12	10	5	16	23	7	22	1	1	7	14	10	14	33	0	5	8	3	9	22
EKVNINIVGDFKLNE	GAAAAGGTGAATATTAACATTGTGGGTGACTTCAAATTGAACGAA	0	EKVNINIVGDFKLNE	0	0	0	0	9	26	1	13	39	0	19	32	0	6	14	13	20	10	12	27	23	11	19	2	2	10	17	8	12	19	0	3	9	2	8	27
KVNINIVGDFKLNEE	AAGGTTAACATCAACATTGTAGGCGACTTCAAGTTAAATGAAGAA	0	KVNINIVGDFKLNEE	0	0	0	0	4	11	0	4	11	0	0	17	0	1	2	19	18	21	16	14	22	20	26	0	6	1	9	9	13	33	0	1	1	8	2	13
VNINIVGDFKLNEEI	GTTAATATTAATATTGTAGGAGATTTTAAGCTCAACGAAGAGATT	0	VNINIVGDFKLNEEI	0	0	0	6	14	10	17	27	9	13	13	16	1	0	4	10	11	16	28	17	14	4	11	0	13	3	6	21	17	16	5	2	2	23	8	10
NINIVGDFKLNEEIA	AATATAAATATTGTGGGGGATTTCAAGTTAAACGAAGAAATCGCC	0	NINIVGDFKLNEEIA	0	0	0	2	0	1	3	1	6	5	2	8	0	0	3	6	5	8	17	9	8	3	7	0	7	3	0	14	9	8	0	5	3	5	7	8
INIVGDFKLNEEIAI	ATTAACATCGTTGGTGACTTTAAGTTAAACGAAGAGATTGCCATT	0	INIVGDFKLNEEIAI	0	0	0	0	1	7	4	0	6	1	0	1	1	0	0	17	21	17	34	2	9	2	14	0	17	0	0	19	3	11	2	0	3	18	2	3
NIVGDFKLNEEIAII	AATATTGTTGGCGATTTCAAGTTAAATGAAGAGATTGCTATCATA	0	NIVGDFKLNEEIAII	0	0	0	5	0	6	7	0	1	2	1	0	0	0	0	22	25	23	26	13	12	12	22	1	11	1	3	24	2	34	0	0	0	19	2	7
IVGDFKLNEEIAIIL	ATTGTGGGTGATTTTAAGTTGAATGAAGAAATTGCGATAATTTTG	0	IVGDFKLNEEIAIIL	0	0	1	5	0	1	2	0	3	0	0	0	0	0	0	16	18	10	14	6	17	4	11	2	4	0	6	11	3	17	0	0	0	11	0	8
VGDFKLNEEIAIILA	GTAGGCGATTTCAAACTTAACGAAGAAATTGCTATCATACTAGCA	0	VGDFKLNEEIAIILA	0	0	1	0	0	13	3	0	32	0	0	44	0	1	26	11	14	10	9	12	22	5	9	0	1	2	32	5	11	24	0	4	16	6	5	20
GDFKLNEEIAIILAS	GGTGACTTCAAGTTAAACGAGGAAATTGCTATTATACTGGCATCA	0	GDFKLNEEIAIILAS	0	0	0	6	11	14	17	9	42	5	13	56	2	11	68	20	17	16	24	55	53	11	21	0	16	18	109	18	31	40	6	10	102	23	22	41
DFKLNEEIAIILASF	GATTTTAAATTAAATGAAGAAATTGCTATTATTCTGGCGTCGTTT	0	DFKLNEEIAIILASF	0	0	0	0	0	10	1	0	43	0	0	45	0	0	23	11	17	7	12	13	24	6	12	1	4	7	28	13	13	29	1	7	34	9	6	22
FKLNEEIAIILASFS	TTCAAGCTAAACGAAGAAATAGCAATCATACTTGCATCCTTTAGC	0	FKLNEEIAIILASFS	0	0	1	10	13	26	7	26	72	13	10	90	6	4	97	12	19	15	31	22	67	3	13	1	15	3	114	21	14	40	0	3	105	15	8	48
KLNEEIAIILASFSA	AAACTTAATGAAGAAATAGCAATAATTTTGGCCTCATTCTCAGCT	0	KLNEEIAIILASFSA	1	0	1	8	31	16	18	57	47	23	29	61	16	17	68	29	20	13	30	45	52	7	23	0	24	14	80	24	27	51	9	12	113	28	11	56
LNEEIAIILASFSAS	CTAAACGAAGAAATAGCTATTATATTGGCCTCATTTTCTGCATCT	0	LNEEIAIILASFSAS	0	0	0	23	29	32	61	91	126	54	79	158	23	29	173	14	14	10	35	84	39	9	17	0	40	40	46	30	30	25	15	40	51	30	39	35
NEEIAIILASFSAST	AATGAAGAAATTGCAATAATTCTAGCTAGTTTCAGTGCTTCGACT	0	NEEIAIILASFSAST	0	0	1	22	25	18	44	67	88	37	100	104	19	47	138	16	28	13	34	103	47	4	12	1	36	83	60	19	36	24	27	96	87	41	70	57
EEIAIILASFSASTS	GAAGAGATTGCTATTATCTTGGCCAGTTTTTCTGCCAGTACTTCA	0	EEIAIILASFSASTS	0	0	0	13	15	8	29	63	34	31	59	34	23	29	46	16	23	10	37	97	75	3	28	0	40	61	102	25	36	57	28	68	117	41	72	66
EIAIILASFSASTSA	GAAATTGCTATCATTTTAGCTTCTTTTTCGGCCTCTACTTCCGCA	0	EIAIILASFSASTSA	0	1	1	27	14	6	56	23	14	59	13	21	8	6	11	22	15	19	26	52	46	4	16	0	15	12	44	24	35	48	5	11	37	18	28	41
IAIILASFSASTSAF	ATTGCAATAATCCTTGCCTCTTTCTCTGCATCTACATCAGCATTT	0	IAIILASFSASTSAF	0	0	0	2	0	0	0	0	2	0	0	0	1	0	0	23	36	23	1	3	1	16	24	1	0	0	0	0	1	1	1	0	0	0	0	0
AIILASFSASTSAFV	GCTATTATCTTGGCCAGCTTTAGTGCAAGTACCTCTGCTTTTGTG	0	AIILASFSASTSAFV	0	0	0	0	0	0	0	0	1	0	0	2	0	0	0	39	47	28	5	3	3	15	15	2	0	0	0	2	1	2	0	0	0	0	0	0
IILASFSASTSAFVE	ATCATTTTGGCTTCGTTTTCAGCTAGCACTAGTGCATTTGTCGAA	0	IILASFSASTSAFVE	0	0	0	2	2	12	2	10	4	0	5	1	1	1	0	23	39	30	27	24	14	15	11	1	3	1	7	27	16	17	0	0	6	8	1	5
ILASFSASTSAFVET	ATTTTAGCCTCATTTTCCGCGTCGACTTCTGCATTTGTAGAAACC	0	ILASFSASTSAFVET	0	0	0	0	0	0	0	0	0	0	0	0	0	0	0	10	5	4	4	0	4	2	2	0	1	0	0	0	1	2	0	0	0	0	0	0
LASFSASTSAFVETV	TTAGCTTCCTTCTCCGCATCTACTAGTGCTTTTGTGGAAACTGTC	0	LASFSASTSAFVETV	0	0	0	14	1	0	47	0	0	43	1	0	8	0	0	18	23	14	35	15	19	0	6	3	30	1	1	14	8	19	11	0	0	25	1	3
ASFSASTSAFVETVK	GCGTCTTTTTCGGCGTCTACATCTGCATTTGTTGAGACAGTGAAG	0	ASFSASTSAFVETVK	0	0	0	3	1	0	6	0	0	1	0	0	1	0	0	27	16	22	25	10	24	9	13	0	12	0	1	28	12	37	1	0	1	8	2	4
SFSASTSAFVETVKG	AGTTTTAGTGCCTCGACAAGTGCCTTTGTAGAGACCGTGAAGGGC	0	SFSASTSAFVETVKG	2	0	1	9	0	0	30	0	1	20	0	0	2	0	0	12	19	19	30	4	9	5	17	1	9	0	0	26	11	8	4	0	0	25	4	1
FSASTSAFVETVKGL	TTCTCTGCTTCGACTTCCGCTTTCGTGGAGACCGTAAAAGGATTG	0	FSASTSAFVETVKGL	0	0	0	1	15	10	1	18	13	0	16	9	0	3	2	5	20	17	19	31	6	4	18	1	4	13	2	20	26	18	1	3	0	2	9	8
SASTSAFVETVKGLD	AGTGCTTCCACTTCAGCTTTCGTAGAAACGGTCAAGGGTCTTGAT	0	SASTSAFVETVKGLD	0	0	0	0	4	3	0	1	2	1	0	0	0	0	0	22	23	20	15	10	31	20	21	0	4	0	8	23	14	52	2	0	1	4	2	10
ASTSAFVETVKGLDY	GCTTCAACATCGGCTTTTGTCGAGACTGTTAAGGGTCTCGACTAT	0	ASTSAFVETVKGLDY	0	0	0	0	0	1	0	0	1	0	0	0	0	0	0	10	17	24	7	8	18	8	23	0	1	1	8	12	8	52	0	2	0	1	2	13
STSAFVETVKGLDYK	TCTACATCTGCCTTCGTTGAAACTGTAAAGGGCTTAGATTACAAA	0	STSAFVETVKGLDYK	0	0	0	3	0	2	9	0	2	3	0	2	2	0	0	16	13	15	11	18	6	7	22	0	3	0	2	7	9	15	2	0	0	0	1	3
TSAFVETVKGLDYKA	ACTAGCGCCTTCGTGGAAACTGTAAAAGGTCTCGACTACAAAGCA	0	TSAFVETVKGLDYKA	0	0	0	0	2	9	0	2	10	0	0	2	0	0	0	21	26	27	8	17	38	2	22	2	6	3	8	12	4	73	1	0	3	4	1	8
SAFVETVKGLDYKAF	TCGGCTTTTGTTGAAACTGTAAAGGGTTTGGACTACAAGGCATTT	0	SAFVETVKGLDYKAF	0	0	0	2	1	2	1	2	1	0	0	4	1	0	0	18	13	8	14	15	23	9	7	1	1	1	5	14	12	45	0	0	5	2	2	12
AFVETVKGLDYKAFK	GCATTCGTCGAGACGGTAAAAGGCTTGGACTATAAGGCCTTTAAG	0	AFVETVKGLDYKAFK	0	1	0	2	0	5	1	0	16	1	0	5	1	1	0	19	20	22	6	14	15	9	25	0	3	2	16	17	7	49	3	2	4	0	0	8
FVETVKGLDYKAFKQ	TTTGTTGAGACAGTTAAGGGTTTAGATTATAAGGCTTTCAAACAA	0	FVETVKGLDYKAFKQ	0	0	0	0	2	3	0	0	8	0	0	7	0	0	4	14	17	18	2	0	10	14	22	2	2	0	1	2	0	20	0	0	1	1	0	4
VETVKGLDYKAFKQI	GTTGAAACAGTGAAAGGACTGGACTATAAGGCATTCAAACAAATT	0	VETVKGLDYKAFKQI	0	0	0	3	0	2	12	0	7	3	0	3	0	1	1	20	29	25	29	25	63	8	23	0	11	1	58	22	19	104	1	1	44	12	4	68
ETVKGLDYKAFKQIV	GAAACAGTTAAAGGGTTGGATTATAAAGCCTTTAAGCAAATAGTC	0	ETVKGLDYKAFKQIV	0	0	0	1	8	3	3	5	10	6	1	3	0	0	2	13	13	10	12	7	27	5	9	0	5	2	10	11	6	46	2	1	7	6	0	18
TVKGLDYKAFKQIVE	ACTGTCAAGGGTCTTGACTATAAGGCTTTTAAGCAAATTGTAGAG	0	TVKGLDYKAFKQIVE	0	0	0	10	2	4	8	1	8	5	0	6	1	2	1	21	30	25	26	16	24	12	15	1	14	9	19	18	9	44	1	4	11	14	2	25
VKGLDYKAFKQIVES	GTTAAAGGTCTAGATTACAAGGCATTTAAACAAATCGTCGAATCC	0	VKGLDYKAFKQIVES	0	1	0	3	4	0	4	2	0	1	0	0	1	0	0	7	8	9	17	3	12	1	4	1	13	0	4	18	1	13	5	0	0	9	1	1
KGLDYKAFKQIVESC	AAGGGACTAGATTATAAGGCTTTTAAACAAATTGTCGAAAGTTGT	0	KGLDYKAFKQIVESC	0	0	0	7	9	3	18	4	6	20	2	5	8	0	1	14	18	15	21	6	2	8	16	0	15	1	1	10	10	5	6	0	0	18	2	1
GLDYKAFKQIVESCG	GGACTAGACTATAAGGCTTTTAAACAAATCGTTGAATCTTGTGGT	0	GLDYKAFKQIVESCG	0	0	0	17	4	27	74	3	58	99	2	28	56	3	7	19	35	20	39	30	39	10	11	1	60	5	10	27	20	71	40	2	7	45	4	34
LDYKAFKQIVESCGN	CTAGATTACAAGGCATTCAAACAGATTGTGGAAAGTTGCGGTAAC	0	LDYKAFKQIVESCGN	0	0	1	14	2	16	25	4	42	53	2	44	41	3	64	15	18	11	41	29	41	4	15	1	60	20	47	18	19	41	51	14	58	39	27	26
DYKAFKQIVESCGNF	GATTATAAAGCTTTTAAACAGATCGTCGAATCATGCGGTAACTTT	0	DYKAFKQIVESCGNF	0	0	2	20	22	36	56	60	97	92	98	131	77	88	163	20	27	13	65	89	72	1	17	1	100	103	112	20	35	36	93	82	149	60	42	42
YKAFKQIVESCGNFK	TATAAAGCATTTAAACAAATCGTGGAAAGCTGTGGTAATTTCAAA	0	YKAFKQIVESCGNFK	0	0	1	1	0	0	6	0	0	2	0	0	1	0	0	16	20	9	1	5	0	8	21	0	1	0	0	1	4	0	0	1	0	2	3	0
KAFKQIVESCGNFKV	AAAGCCTTTAAACAGATCGTTGAGTCGTGTGGTAACTTTAAAGTC	0	KAFKQIVESCGNFKV	0	0	0	16	19	12	36	18	55	55	28	38	23	14	52	7	16	11	24	30	37	3	13	1	23	24	62	12	21	38	15	14	29	12	14	41
AFKQIVESCGNFKVT	GCATTTAAACAAATAGTGGAATCATGTGGTAATTTTAAGGTTACA	0	AFKQIVESCGNFKVT	0	0	0	1	0	1	5	0	0	2	0	0	1	0	0	6	11	12	1	4	9	6	8	0	0	1	2	1	2	15	0	1	0	0	4	3
FKQIVESCGNFKVTK	TTCAAACAGATTGTTGAATCCTGTGGGAATTTTAAAGTGACCAAA	0	FKQIVESCGNFKVTK	0	0	0	0	0	0	3	0	0	1	0	0	0	0	0	10	19	10	4	2	0	5	12	1	1	1	0	1	0	0	0	0	0	0	0	0
KQIVESCGNFKVTKG	AAGCAAATAGTTGAGTCATGTGGTAACTTTAAAGTTACGAAAGGT	0	KQIVESCGNFKVTKG	0	0	0	0	0	0	0	0	0	0	0	0	0	0	0	0	0	0	0	0	0	0	0	0	0	0	0	0	0	0	0	0	0	0	0	0
QIVESCGNFKVTKGK	CAGATTGTCGAATCGTGTGGAAATTTTAAAGTTACTAAAGGTAAA	0	QIVESCGNFKVTKGK	0	0	2	24	14	15	38	39	52	24	45	46	1	23	45	18	27	16	26	74	31	4	11	0	9	48	61	31	35	44	1	56	56	15	49	50
IVESCGNFKVTKGKA	ATTGTTGAGAGCTGTGGTAATTTTAAGGTTACGAAAGGTAAAGCG	0	IVESCGNFKVTKGKA	0	0	0	1	0	0	1	0	0	1	0	0	0	0	0	14	16	15	2	7	4	11	13	0	1	2	1	1	2	5	0	0	1	0	0	2
VESCGNFKVTKGKAK	GTTGAATCTTGTGGAAATTTTAAAGTAACCAAAGGTAAGGCCAAA	0	VESCGNFKVTKGKAK	0	0	0	1	4	4	3	2	3	10	3	1	2	1	0	18	15	10	2	10	0	3	8	0	1	5	0	3	7	0	1	0	0	0	0	0
ESCGNFKVTKGKAKK	GAATCCTGCGGTAATTTTAAAGTAACAAAGGGCAAGGCTAAGAAA	0	ESCGNFKVTKGKAKK	0	0	0	2	0	0	0	0	0	0	0	0	0	0	0	18	16	12	3	4	1	13	22	1	1	0	3	1	4	3	2	0	2	1	1	1
SCGNFKVTKGKAKKG	TCCTGCGGAAATTTTAAAGTGACTAAAGGAAAGGCCAAGAAAGGA	0	SCGNFKVTKGKAKKG	0	0	0	0	0	0	0	0	3	0	0	4	0	0	1	16	9	13	0	3	0	7	13	1	1	3	0	5	5	0	0	2	0	0	1	0
CGNFKVTKGKAKKGA	TGTGGCAATTTTAAGGTAACTAAGGGTAAGGCCAAGAAAGGTGCT	0	CGNFKVTKGKAKKGA	0	0	0	0	0	0	0	0	0	0	0	0	0	0	0	19	29	25	5	3	8	12	12	1	3	0	1	2	1	6	0	0	0	1	0	0
GNFKVTKGKAKKGAW	GGTAACTTTAAAGTTACTAAAGGTAAAGCTAAAAAGGGTGCATGG	0	GNFKVTKGKAKKGAW	0	0	0	0	0	0	0	0	1	0	0	2	0	0	1	14	15	17	4	14	0	8	24	1	2	3	1	5	12	2	1	1	0	3	4	1
NFKVTKGKAKKGAWN	AATTTTAAAGTTACTAAAGGCAAAGCCAAGAAGGGTGCTTGGAAT	0	NFKVTKGKAKKGAWN	0	0	0	0	0	0	0	0	0	0	0	0	0	0	0	21	27	17	4	2	1	11	14	0	1	1	0	2	5	2	0	0	0	2	0	4
FKVTKGKAKKGAWNI	TTTAAGGTTACTAAAGGAAAAGCAAAGAAGGGTGCCTGGAACATC	0	FKVTKGKAKKGAWNI	0	0	0	0	0	0	0	0	0	0	0	0	0	1	0	8	21	10	1	1	0	5	10	0	1	0	0	2	2	0	0	0	0	0	0	0
KVTKGKAKKGAWNIG	AAGGTGACCAAGGGTAAGGCTAAAAAAGGCGCATGGAATATCGGA	0	KVTKGKAKKGAWNIG	0	0	0	0	0	3	0	0	18	1	0	10	0	1	6	12	26	17	2	3	1	11	14	1	1	6	0	2	4	3	0	3	0	3	4	0
VTKGKAKKGAWNIGE	GTTACAAAAGGTAAAGCTAAAAAGGGTGCCTGGAACATCGGAGAA	0	VTKGKAKKGAWNIGE	0	0	0	0	0	0	0	0	0	0	0	0	0	0	0	5	10	15	1	0	0	6	10	0	0	0	0	0	0	0	0	1	0	1	0	0
TKGKAKKGAWNIGEQ	ACTAAAGGTAAAGCGAAAAAGGGTGCCTGGAACATCGGCGAACAG	0	TKGKAKKGAWNIGEQ	0	0	0	2	0	0	5	0	0	6	0	0	0	0	0	17	24	20	5	7	2	14	21	0	1	1	0	8	2	1	2	0	1	2	0	1
KGKAKKGAWNIGEQK	AAGGGGAAGGCAAAAAAGGGTGCTTGGAATATCGGTGAACAAAAA	0	KGKAKKGAWNIGEQK	0	0	0	1	0	0	5	0	0	3	0	0	2	0	0	19	29	17	3	3	4	22	20	0	1	1	1	1	0	0	1	0	0	0	0	0
GKAKKGAWNIGEQKS	GGAAAAGCAAAAAAAGGAGCATGGAACATAGGTGAGCAAAAATCA	0	GKAKKGAWNIGEQKS	0	0	0	1	1	1	0	0	4	0	0	2	0	0	3	27	22	10	11	15	25	16	22	1	2	1	2	10	19	43	1	0	1	0	3	7
KAKKGAWNIGEQKSI	AAGGCAAAAAAAGGCGCATGGAATATAGGGGAACAAAAGAGCATT	0	KAKKGAWNIGEQKSI	0	0	0	1	18	9	2	54	16	1	35	7	0	16	1	27	44	19	19	78	29	15	29	1	4	50	13	21	32	54	4	26	10	8	38	21
AKKGAWNIGEQKSIL	GCCAAGAAAGGAGCATGGAATATAGGTGAACAAAAGTCTATTCTG	0	AKKGAWNIGEQKSIL	0	0	0	2	8	3	6	28	13	3	36	21	2	29	9	23	26	21	29	99	35	6	16	1	18	72	19	22	25	42	2	70	12	17	33	21
KKGAWNIGEQKSILS	AAGAAAGGAGCATGGAATATTGGTGAACAGAAAAGCATCTTATCG	0	KKGAWNIGEQKSILS	0	0	0	6	39	10	11	69	23	12	93	11	0	76	7	27	23	20	31	106	28	6	12	1	25	110	26	27	41	67	11	103	17	32	67	44
KGAWNIGEQKSILSP	AAGGGTGCATGGAATATAGGTGAACAGAAATCAATACTATCCCCC	0	KGAWNIGEQKSILSP	0	0	0	2	8	13	8	13	27	11	14	12	2	19	4	7	6	6	16	32	24	1	2	0	22	47	32	17	12	30	17	51	21	12	39	44
GAWNIGEQKSILSPL	GGTGCGTGGAATATTGGGGAACAGAAGTCCATTTTGAGTCCACTG	0	GAWNIGEQKSILSPL	0	0	0	1	25	4	5	92	22	3	115	29	4	164	36	3	6	8	18	52	17	0	2	0	28	39	39	3	5	20	14	58	42	28	25	35
AWNIGEQKSILSPLY	GCCTGGAATATTGGAGAACAAAAATCTATTCTCTCCCCCCTATAC	0	AWNIGEQKSILSPLY	0	0	0	3	7	9	10	22	29	8	59	23	1	39	19	10	11	12	25	67	22	1	9	0	13	85	18	19	18	19	4	93	20	14	57	25
WNIGEQKSILSPLYA	TGGAACATTGGAGAACAAAAGAGTATACTAAGTCCACTGTACGCT	0	WNIGEQKSILSPLYA	0	0	0	0	49	23	0	92	71	1	140	71	3	161	62	15	14	8	22	100	50	6	9	0	26	98	56	14	24	41	6	146	48	26	62	61
NIGEQKSILSPLYAF	AACATTGGCGAGCAAAAGAGCATCTTAAGCCCATTATATGCATTT	0	NIGEQKSILSPLYAF	1	0	0	13	33	5	40	93	30	72	145	25	57	309	24	16	26	23	56	158	118	1	15	0	81	195	134	25	29	117	68	339	120	78	79	123
IGEQKSILSPLYAFA	ATCGGCGAACAAAAATCAATATTGTCTCCCTTGTACGCCTTTGCT	0	IGEQKSILSPLYAFA	0	0	0	1	41	11	0	75	20	1	124	13	0	67	8	27	15	19	20	95	39	9	16	1	7	60	18	14	32	73	3	65	4	10	63	35
GEQKSILSPLYAFAS	GGCGAACAAAAATCTATCCTCAGTCCTTTGTATGCTTTTGCGTCT	0	GEQKSILSPLYAFAS	0	0	0	5	31	30	2	70	108	4	45	155	2	40	113	21	28	21	39	99	96	10	29	1	12	51	101	32	39	84	0	58	100	26	61	99
EQKSILSPLYAFASE	GAACAGAAATCAATTCTATCACCATTATACGCTTTTGCCAGTGAG	0	EQKSILSPLYAFASE	0	0	0	30	41	22	70	112	69	192	189	72	158	234	114	21	25	11	48	105	102	1	19	1	92	120	173	15	28	55	80	171	253	45	66	59
QKSILSPLYAFASEA	CAAAAATCAATTTTGTCCCCACTGTACGCATTCGCTTCTGAAGCA	0	QKSILSPLYAFASEA	0	0	0	11	31	16	23	52	65	49	99	72	26	71	71	16	15	15	38	63	44	2	20	1	59	66	49	15	31	28	53	53	65	26	40	27
KSILSPLYAFASEAA	AAATCTATCCTGAGCCCACTCTATGCTTTTGCATCCGAAGCTGCA	0	KSILSPLYAFASEAA	0	0	0	7	22	15	30	36	41	52	56	35	30	23	35	18	22	16	62	44	35	1	23	0	82	32	56	15	26	22	72	27	52	42	27	26
SILSPLYAFASEAAR	TCTATTTTATCCCCGCTGTATGCCTTCGCTAGTGAAGCTGCAAGA	0	SILSPLYAFASEAAR	0	0	0	9	18	10	24	38	59	48	28	38	15	16	28	18	19	26	61	52	32	2	19	3	64	28	32	28	29	37	49	5	45	53	22	34
ILSPLYAFASEAARV	ATTCTCTCTCCTCTTTATGCATTCGCAAGTGAAGCTGCTAGAGTA	0	ILSPLYAFASEAARV	0	0	1	7	12	21	12	4	40	14	2	26	3	1	10	22	29	23	38	13	23	6	23	0	48	2	6	29	9	15	9	0	4	28	6	5
LSPLYAFASEAARVV	CTGTCTCCTTTATATGCTTTTGCTTCAGAGGCCGCAAGAGTCGTT	0	LSPLYAFASEAARVV	0	0	0	11	18	17	54	11	71	46	8	53	14	0	20	16	33	20	64	30	46	3	20	0	61	10	34	42	25	45	47	5	25	56	21	62
SPLYAFASEAARVVR	AGTCCACTTTATGCTTTTGCCTCTGAAGCGGCTAGAGTAGTTAGA	0	SPLYAFASEAARVVR	1	0	0	7	5	15	20	20	24	31	43	30	12	19	19	23	20	18	40	19	40	2	12	0	45	8	46	21	11	56	33	8	24	31	11	54
PLYAFASEAARVVRS	CCTTTATATGCTTTTGCATCTGAGGCTGCTAGAGTAGTTAGATCC	0	PLYAFASEAARVVRS	0	0	0	0	0	0	0	0	4	0	0	0	0	0	2	7	8	7	3	1	0	8	11	3	0	0	0	4	2	0	1	0	0	0	0	0
LYAFASEAARVVRSI	CTTTATGCGTTCGCCTCCGAAGCCGCGAGAGTAGTTAGAAGCATC	0	LYAFASEAARVVRSI	0	0	0	0	0	0	0	0	1	0	0	0	0	0	0	7	2	3	0	0	0	0	5	0	0	0	0	0	0	1	0	0	0	0	0	0
YAFASEAARVVRSIF	TATGCTTTCGCCTCAGAAGCTGCAAGGGTGGTTCGTTCAATTTTT	0	YAFASEAARVVRSIF	0	0	0	0	0	0	1	0	0	0	0	0	0	0	0	20	24	16	4	9	10	16	15	0	2	1	0	5	5	8	0	0	0	0	1	1
AFASEAARVVRSIFS	GCTTTTGCATCAGAGGCAGCCAGGGTCGTACGTTCTATATTTTCA	0	AFASEAARVVRSIFS	0	0	0	0	33	12	0	33	18	0	26	9	0	5	5	20	11	13	13	24	23	10	19	1	3	9	11	18	14	39	0	11	6	5	10	16
FASEAARVVRSIFSR	TTTGCTTCAGAGGCAGCCCGCGTCGTTAGGTCCATATTTAGCAGA	0	FASEAARVVRSIFSR	0	0	0	0	0	0	0	0	0	0	0	0	0	0	0	12	23	22	1	0	1	14	9	0	0	0	0	3	0	0	0	0	0	1	0	0
ASEAARVVRSIFSRT	GCTTCGGAAGCTGCAAGAGTTGTGAGGTCAATTTTTAGCCGGACC	0	ASEAARVVRSIFSRT	0	0	0	0	0	0	0	0	0	0	0	0	0	0	0	1	2	0	0	1	0	1	0	0	0	0	0	0	1	0	0	0	0	0	0	0
SEAARVVRSIFSRTL	TCCGAAGCCGCACGAGTGGTCAGGTCTATCTTTAGTAGAACTCTA	0	SEAARVVRSIFSRTL	0	0	0	0	2	3	2	0	3	1	3	1	1	0	3	7	11	14	2	16	4	3	14	1	0	4	0	1	12	7	0	2	0	1	7	0
EAARVVRSIFSRTLE	GAAGCAGCCAGGGTTGTCCGTTCCATATTTTCTCGTACATTAGAG	0	EAARVVRSIFSRTLE	0	0	0	0	0	0	0	0	0	0	0	0	0	0	0	10	14	12	2	1	1	11	12	1	0	0	0	2	0	5	0	0	0	0	0	0
AARVVRSIFSRTLET	GCTGCACGTGTTGTTAGATCCATCTTCAGTAGAACATTAGAGACG	0	AARVVRSIFSRTLET	0	0	0	0	0	0	0	0	0	0	0	0	1	0	0	21	12	22	6	2	0	7	17	0	1	0	0	0	0	0	1	0	0	0	0	0
ARVVRSIFSRTLETA	GCTAGAGTTGTGAGATCAATTTTCTCCCGCACTCTAGAAACAGCC	0	ARVVRSIFSRTLETA	0	0	0	0	0	0	0	0	0	0	0	0	0	0	0	7	6	6	1	0	0	2	3	0	1	0	0	1	0	0	1	0	0	1	0	0
RVVRSIFSRTLETAQ	CGTGTAGTTAGATCGATATTCAGTAGAACGCTGGAAACAGCCCAG	0	RVVRSIFSRTLETAQ	0	0	0	0	0	10	0	0	1	0	0	1	0	0	0	9	13	12	6	0	1	7	9	0	1	2	0	3	1	10	0	0	0	0	0	0
VVRSIFSRTLETAQN	GTAGTTAGGAGTATTTTTTCTAGAACCCTAGAAACTGCCCAAAAT	0	VVRSIFSRTLETAQN	0	0	0	0	0	0	0	0	1	0	1	0	0	0	0	19	19	15	1	1	0	13	26	0	1	0	0	0	0	0	0	0	0	0	0	0
VRSIFSRTLETAQNS	GTTAGAAGCATTTTTTCCCGGACATTGGAAACTGCCCAGAACTCT	0	VRSIFSRTLETAQNS	0	0	0	0	0	0	0	0	0	0	0	0	0	0	0	9	9	7	1	0	0	3	11	0	0	0	0	0	0	0	0	0	0	0	0	0
RSIFSRTLETAQNSV	CGTTCCATATTTTCGAGGACGCTGGAAACTGCACAAAATTCTGTC	0	RSIFSRTLETAQNSV	0	0	1	12	21	27	77	80	77	145	108	85	110	127	103	9	18	19	37	69	79	1	12	0	88	80	151	7	29	34	79	104	181	37	67	54
SIFSRTLETAQNSVR	AGTATATTCTCTCGTACTTTAGAAACAGCCCAAAATTCTGTGAGA	0	SIFSRTLETAQNSVR	1	0	0	6	29	6	10	46	38	11	36	31	2	12	11	12	23	20	32	44	44	7	11	1	24	26	47	12	28	72	10	12	25	30	31	62
IFSRTLETAQNSVRV	ATATTTAGCAGGACATTGGAAACCGCTCAGAATTCTGTCAGAGTG	0	IFSRTLETAQNSVRV	0	0	0	7	0	5	3	0	18	0	0	4	0	0	0	16	19	14	13	21	7	6	7	0	6	2	3	13	8	10	0	2	1	8	4	2
FSRTLETAQNSVRVL	TTCTCAAGAACATTGGAAACAGCACAGAACAGTGTTAGAGTTCTA	0	FSRTLETAQNSVRVL	0	0	0	0	0	2	0	0	3	0	0	8	0	0	3	7	13	10	20	19	58	4	8	0	3	2	23	11	18	62	2	1	10	4	6	26
SRTLETAQNSVRVLQ	TCTAGGACACTGGAAACCGCTCAGAATAGCGTAAGAGTCTTACAA	0	SRTLETAQNSVRVLQ	0	0	0	3	9	8	3	9	35	4	1	27	1	1	8	10	25	8	16	18	39	5	13	1	9	1	18	19	9	42	0	0	12	8	1	23
RTLETAQNSVRVLQK	AGGACTCTCGAAACTGCTCAGAACTCCGTTAGGGTTTTACAGAAG	0	RTLETAQNSVRVLQK	0	0	0	2	13	25	1	11	50	4	8	26	3	1	10	20	39	15	30	34	50	10	28	0	8	9	47	28	27	68	2	2	12	6	11	53
TLETAQNSVRVLQKA	ACGTTAGAAACTGCCCAGAACTCCGTCCGCGTTTTGCAAAAGGCT	0	TLETAQNSVRVLQKA	0	0	0	0	16	1	0	29	17	0	11	6	0	2	2	21	27	13	26	20	72	8	7	0	6	4	30	18	7	50	1	3	21	4	7	37
LETAQNSVRVLQKAA	TTGGAAACTGCGCAAAACAGTGTTCGTGTTTTACAAAAAGCTGCT	0	LETAQNSVRVLQKAA	0	0	0	0	15	4	0	15	12	0	19	1	0	8	0	5	11	12	8	25	18	5	8	2	0	5	8	5	14	26	0	2	6	2	10	9
ETAQNSVRVLQKAAI	GAGACCGCACAGAACTCAGTGAGAGTTCTACAAAAAGCTGCAATA	0	ETAQNSVRVLQKAAI	0	0	0	2	44	15	2	106	34	0	174	39	3	298	17	19	35	16	17	137	43	14	19	3	8	145	41	16	33	45	2	241	29	1	79	47
TAQNSVRVLQKAAIT	ACTGCTCAAAACTCCGTTAGAGTCTTGCAGAAGGCCGCAATTACG	0	TAQNSVRVLQKAAIT	0	0	0	1	36	8	3	97	19	6	104	47	3	126	7	11	11	9	6	22	12	3	6	0	4	18	19	13	19	26	1	18	7	0	9	25
AQNSVRVLQKAAITI	GCACAAAATAGTGTCCGAGTGTTACAGAAAGCAGCAATTACTATT	0	AQNSVRVLQKAAITI	1	0	0	3	18	34	12	17	77	4	21	78	0	3	42	17	23	21	14	41	63	10	14	1	1	17	72	12	20	67	0	11	42	5	19	73
QNSVRVLQKAAITIL	CAAAATAGCGTTCGTGTTTTACAAAAAGCCGCCATTACCATATTG	0	QNSVRVLQKAAITIL	0	0	0	0	1	0	2	2	0	0	0	0	0	0	0	10	20	9	7	12	17	9	20	1	1	2	2	8	10	21	0	1	4	2	1	6
NSVRVLQKAAITILD	AATTCTGTTAGGGTCTTACAAAAGGCTGCAATTACCATCTTGGAC	0	NSVRVLQKAAITILD	0	0	0	2	1	4	2	1	21	0	3	10	0	2	2	19	17	19	5	17	69	7	18	0	5	3	24	9	9	125	0	2	4	7	4	50
SVRVLQKAAITILDG	TCTGTTAGGGTCCTGCAAAAAGCAGCTATTACTATTCTGGACGGT	0	SVRVLQKAAITILDG	0	0	0	0	0	0	0	0	1	0	0	0	0	0	0	30	29	30	2	7	6	27	35	1	1	1	8	4	7	4	0	2	7	1	3	2
VRVLQKAAITILDGI	GTTAGAGTCTTACAGAAGGCAGCCATTACTATTTTAGACGGTATC	0	VRVLQKAAITILDGI	0	0	0	0	0	0	0	0	0	2	0	0	0	0	0	15	16	13	3	4	0	4	9	1	0	0	0	3	0	0	0	0	0	1	0	0
RVLQKAAITILDGIS	AGAGTTCTGCAGAAAGCTGCGATCACAATTTTGGATGGAATTTCC	0	RVLQKAAITILDGIS	0	0	0	0	7	16	0	18	28	0	7	36	0	5	25	11	14	12	20	19	24	7	13	1	1	4	32	12	11	33	1	4	29	6	7	36
VLQKAAITILDGISQ	GTTCTGCAGAAGGCGGCGATTACCATCCTAGACGGGATAAGTCAA	0	VLQKAAITILDGISQ	0	0	0	1	1	6	0	0	35	0	2	22	0	0	10	8	15	15	6	5	15	10	7	0	2	3	16	6	11	40	0	0	14	2	5	33
LQKAAITILDGISQY	TTGCAAAAAGCAGCGATTACTATTTTGGATGGTATTAGTCAATAT	0	LQKAAITILDGISQY	0	0	0	2	7	30	1	9	48	0	0	30	0	0	6	16	22	16	9	4	12	4	13	3	2	2	12	12	3	31	2	0	6	1	0	9
QKAAITILDGISQYS	CAAAAAGCCGCAATAACAATTCTTGATGGAATCTCACAATATTCA	0	QKAAITILDGISQYS	1	0	0	8	21	16	27	58	51	51	130	63	43	161	116	13	13	8	13	71	70	1	9	0	34	92	144	11	15	11	35	135	198	20	39	22
KAAITILDGISQYSL	AAAGCAGCAATTACTATCTTAGATGGTATCTCTCAGTATTCTTTA	0	KAAITILDGISQYSL	2	0	0	34	59	37	91	158	85	121	268	111	58	358	190	20	16	19	52	206	165	5	12	1	61	197	288	34	32	42	58	371	390	59	68	39
AAITILDGISQYSLR	GCAGCTATTACCATATTAGACGGTATCTCCCAGTATTCCTTAAGA	0	AAITILDGISQYSLR	0	0	1	2	93	48	12	175	115	12	275	123	3	339	137	12	26	26	27	99	31	11	17	2	12	95	70	22	24	43	5	137	94	16	48	51
AITILDGISQYSLRL	GCGATTACTATTTTAGATGGAATTTCGCAATATTCCTTGAGATTG	0	AITILDGISQYSLRL	0	0	0	18	98	54	35	181	139	19	253	136	4	199	83	23	32	29	41	80	45	9	13	1	17	80	39	35	14	46	1	90	30	16	38	35
ITILDGISQYSLRLI	ATTACAATCTTAGACGGTATTTCTCAGTACTCGCTGCGCTTAATT	0	ITILDGISQYSLRLI	0	0	0	4	54	16	4	114	17	2	115	13	1	82	6	24	22	28	34	106	14	12	22	0	11	80	14	25	21	33	2	94	5	15	52	13
TILDGISQYSLRLID	ACAATCTTGGACGGTATCTCTCAGTATTCCTTACGATTGATAGAC	0	TILDGISQYSLRLID	0	0	0	8	38	46	29	101	143	38	137	221	22	128	294	29	17	16	65	119	65	5	15	1	73	109	85	28	28	22	59	146	118	58	74	50
ILDGISQYSLRLIDA	ATTTTGGATGGGATCTCCCAATACTCTTTACGCCTAATTGATGCT	0	ILDGISQYSLRLIDA	0	0	0	4	5	4	2	8	2	1	2	2	0	2	1	20	26	20	8	18	15	13	13	3	1	5	3	11	10	16	0	2	7	2	6	8
LDGISQYSLRLIDAM	CTTGATGGCATTAGCCAATATTCTTTGCGATTGATTGACGCTATG	0	LDGISQYSLRLIDAM	0	0	0	16	37	48	60	30	124	90	16	158	33	7	226	31	41	37	70	79	131	7	22	1	74	33	172	39	45	67	54	20	224	90	51	87
DGISQYSLRLIDAMM	GACGGCATCAGTCAATACTCTCTAAGACTAATTGATGCCATGATG	0	DGISQYSLRLIDAMM	0	0	0	3	2	6	9	3	43	12	9	64	2	10	100	9	20	10	21	14	53	2	11	0	28	8	77	10	15	38	24	8	147	28	7	24
GISQYSLRLIDAMMF	GGTATATCTCAATACTCTTTAAGGCTAATTGACGCTATGATGTTT	0	GISQYSLRLIDAMMF	0	0	0	0	0	9	0	0	6	0	0	9	0	1	3	29	36	24	17	17	36	11	16	2	9	2	28	18	18	75	0	1	16	8	2	31
ISQYSLRLIDAMMFT	ATATCACAATACTCCCTAAGGTTGATTGATGCAATGATGTTTACT	0	ISQYSLRLIDAMMFT	0	0	0	0	0	0	0	0	0	0	0	0	1	0	0	19	25	18	2	6	5	17	19	0	0	0	2	1	3	7	1	1	1	1	0	2
SQYSLRLIDAMMFTS	TCCCAGTACTCATTACGATTGATTGATGCAATGATGTTTACGTCA	0	SQYSLRLIDAMMFTS	0	2	0	0	0	6	2	0	12	0	0	8	0	0	3	15	13	15	20	20	21	7	16	0	5	4	6	13	19	28	1	1	9	3	3	12
QYSLRLIDAMMFTSD	CAATATTCCTTGCGCCTAATTGATGCAATGATGTTCACTTCTGAT	0	QYSLRLIDAMMFTSD	0	0	0	14	2	20	35	1	29	8	0	15	3	0	2	23	36	32	44	16	41	13	37	3	9	2	27	21	16	80	1	1	7	18	5	25
YSLRLIDAMMFTSDL	TATTCTCTACGACTAATTGATGCCATGATGTTCACTTCCGACTTG	0	YSLRLIDAMMFTSDL	0	0	0	5	5	9	12	8	11	8	4	4	0	0	0	22	27	17	52	24	23	9	20	1	19	2	25	27	20	30	9	2	5	32	3	24
SLRLIDAMMFTSDLA	TCATTAAGATTAATCGACGCTATGATGTTTACTTCCGACTTGGCC	0	SLRLIDAMMFTSDLA	0	0	0	1	0	2	2	0	2	3	0	5	0	0	0	9	11	11	20	11	6	2	15	0	24	0	4	16	4	23	6	1	0	14	2	5
LRLIDAMMFTSDLAT	TTGAGATTGATCGATGCTATGATGTTTACTTCTGATCTGGCGACG	0	LRLIDAMMFTSDLAT	0	0	0	5	0	0	10	0	0	9	0	0	3	0	0	13	17	16	19	3	9	2	13	0	28	0	0	7	1	15	27	0	0	18	1	1
RLIDAMMFTSDLATN	AGATTAATAGATGCTATGATGTTTACAAGTGATCTAGCCACAAAC	0	RLIDAMMFTSDLATN	0	0	0	12	6	4	24	1	4	43	0	2	18	0	1	12	10	8	11	0	21	3	8	0	36	0	5	5	0	23	34	0	1	8	2	3
LIDAMMFTSDLATNN	TTAATTGACGCTATGATGTTCACAAGTGATTTAGCAACTAATAAT	0	LIDAMMFTSDLATNN	0	0	0	20	0	6	70	0	4	84	0	2	26	0	0	24	26	14	52	5	15	3	26	0	57	0	4	16	3	9	37	1	2	46	0	1
IDAMMFTSDLATNNL	ATTGACGCCATGATGTTTACATCAGATTTAGCAACTAATAATCTG	0	IDAMMFTSDLATNNL	0	0	1	31	0	20	81	0	48	163	1	28	130	1	2	15	24	22	63	24	28	2	11	1	117	4	15	10	18	42	116	1	6	68	9	32
DAMMFTSDLATNNLV	GACGCTATGATGTTCACATCCGATCTGGCAACTAATAATTTAGTC	0	DAMMFTSDLATNNLV	0	0	0	4	3	4	17	3	7	24	1	9	19	0	1	7	13	1	22	9	17	0	13	0	48	1	11	5	6	15	45	3	8	15	2	12
AMMFTSDLATNNLVV	GCTATGATGTTTACTTCCGATCTTGCCACCAATAACCTCGTAGTT	0	AMMFTSDLATNNLVV	0	0	0	10	1	2	42	0	0	71	0	0	40	0	0	6	3	6	20	9	0	4	6	0	23	2	0	5	2	4	21	0	0	31	2	4
MMFTSDLATNNLVVM	ATGATGTTCACTTCCGATTTGGCAACGAACAACCTAGTAGTAATG	0	MMFTSDLATNNLVVM	0	0	0	32	0	5	74	1	5	99	0	1	48	1	0	22	26	18	65	9	22	1	28	0	113	2	2	24	7	40	86	3	1	77	4	8
MFTSDLATNNLVVMA	ATGTTCACCTCCGACTTAGCAACTAATAACTTGGTCGTAATGGCG	0	MFTSDLATNNLVVMA	0	0	0	10	0	4	50	1	7	62	0	7	20	0	2	14	28	23	60	35	34	7	19	0	55	2	12	27	17	68	40	4	4	58	4	24
FTSDLATNNLVVMAY	TTCACATCGGATCTAGCCACTAACAATTTGGTGGTGATGGCATAT	0	FTSDLATNNLVVMAY	0	0	0	0	6	0	0	11	0	0	5	0	0	2	0	6	7	3	4	4	6	3	6	0	0	0	5	4	6	14	1	1	0	3	0	3
TSDLATNNLVVMAYI	ACTAGTGATCTTGCCACCAATAACCTCGTAGTTATGGCATATATT	0	TSDLATNNLVVMAYI	0	0	0	0	14	34	0	20	49	1	13	49	0	10	44	9	8	13	15	54	51	13	13	0	4	19	48	16	37	62	2	7	54	4	31	53
SDLATNNLVVMAYIT	AGTGATTTAGCTACAAATAACTTGGTTGTAATGGCATACATTACA	0	SDLATNNLVVMAYIT	0	0	0	2	36	24	9	72	76	4	49	110	1	27	89	19	21	18	24	49	59	10	18	1	5	27	71	41	34	57	1	28	51	16	31	53
DLATNNLVVMAYITG	GACTTGGCAACCAATAACCTGGTTGTAATGGCATATATAACGGGA	0	DLATNNLVVMAYITG	0	0	2	1	10	15	0	45	36	3	16	28	0	4	24	15	20	14	11	42	49	6	19	1	3	14	35	8	20	58	0	11	44	5	15	44
LATNNLVVMAYITGG	CTCGCAACAAACAACCTAGTGGTTATGGCTTATATAACTGGTGGA	0	LATNNLVVMAYITGG	0	0	0	0	2	5	2	2	7	0	0	2	0	0	0	17	19	27	21	11	27	15	21	0	4	3	14	20	14	63	1	0	5	4	1	33
ATNNLVVMAYITGGV	GCAACAAATAACTTGGTAGTAATGGCATACATAACGGGCGGTGTC	0	ATNNLVVMAYITGGV	0	0	0	13	22	20	23	22	33	8	25	22	0	14	9	15	28	35	27	30	47	9	24	0	7	6	49	22	16	65	1	4	38	12	3	71
TNNLVVMAYITGGVV	ACGAACAACTTAGTTGTCATGGCTTACATAACCGGTGGCGTGGTC	0	TNNLVVMAYITGGVV	0	0	0	3	0	6	5	0	13	2	0	15	1	0	7	8	17	13	26	18	12	3	10	0	8	1	9	22	3	23	3	2	2	12	3	13
NNLVVMAYITGGVVQ	AACAATTTAGTTGTCATGGCATACATTACAGGGGGTGTGGTACAG	0	NNLVVMAYITGGVVQ	0	0	0	2	2	8	4	1	12	1	0	5	0	0	2	7	29	22	30	23	10	13	14	3	10	8	6	34	21	16	5	2	3	23	13	8
NLVVMAYITGGVVQL	AACCTTGTTGTCATGGCATATATTACGGGAGGTGTTGTTCAACTA	0	NLVVMAYITGGVVQL	0	0	0	1	3	20	4	2	24	8	1	9	3	0	1	18	21	14	13	34	24	11	18	0	5	8	8	23	18	30	1	4	3	5	12	13
LVVMAYITGGVVQLT	CTGGTCGTGATGGCGTATATTACCGGTGGTGTGGTGCAATTAACT	0	LVVMAYITGGVVQLT	0	0	0	0	0	0	0	0	0	0	0	0	1	0	0	24	29	22	1	2	3	10	15	2	0	0	0	3	2	5	0	0	0	0	0	0
VVMAYITGGVVQLTS	GTGGTGATGGCTTACATTACCGGCGGAGTGGTTCAACTAACCTCT	0	VVMAYITGGVVQLTS	0	0	0	0	1	8	1	0	24	0	0	12	0	0	5	16	24	19	6	25	42	9	23	0	1	4	16	9	19	47	3	0	5	1	6	23
VMAYITGGVVQLTSQ	GTTATGGCATACATTACTGGTGGTGTCGTTCAATTGACTTCACAA	0	VMAYITGGVVQLTSQ	0	0	0	0	16	39	0	31	62	0	18	52	1	11	23	17	18	26	17	56	72	14	22	1	1	22	65	13	15	85	0	10	42	9	12	41
MAYITGGVVQLTSQW	ATGGCTTACATAACCGGTGGGGTCGTCCAATTAACAAGTCAATGG	0	MAYITGGVVQLTSQW	0	1	0	0	1	4	0	2	1	0	1	1	1	0	0	18	23	21	5	1	14	10	9	2	0	2	1	3	1	9	0	0	0	0	0	0
AYITGGVVQLTSQWL	GCTTATATTACTGGTGGCGTTGTTCAATTAACTTCCCAATGGCTG	0	AYITGGVVQLTSQWL	0	0	0	0	9	6	0	8	8	0	0	5	0	0	2	10	26	14	10	24	10	12	15	1	2	3	1	11	16	13	2	2	4	2	6	8
YITGGVVQLTSQWLT	TACATCACCGGTGGTGTAGTACAGTTAACGTCTCAATGGCTTACT	0	YITGGVVQLTSQWLT	0	0	0	0	6	16	0	4	25	0	2	9	0	3	4	12	15	23	10	34	28	7	11	0	1	9	17	3	10	21	1	6	4	2	9	15
ITGGVVQLTSQWLTN	ATTACCGGTGGAGTCGTGCAACTAACTTCTCAATGGCTGACCAAT	0	ITGGVVQLTSQWLTN	0	0	0	0	0	0	0	0	0	0	0	0	0	0	0	18	23	17	2	1	2	6	9	1	0	0	0	2	3	1	0	0	0	1	0	0
TGGVVQLTSQWLTNI	ACAGGAGGTGTGGTCCAATTGACTTCTCAATGGTTAACTAACATT	0	TGGVVQLTSQWLTNI	0	0	0	3	2	22	1	3	23	0	1	12	0	0	4	20	19	13	22	54	30	18	25	0	4	14	12	24	32	53	1	14	8	8	22	27
GGVVQLTSQWLTNIF	GGAGGTGTAGTTCAATTGACAAGTCAATGGCTAACCAACATCTTT	0	GGVVQLTSQWLTNIF	0	0	0	1	2	0	0	2	2	0	0	2	1	0	1	14	24	16	6	6	17	12	20	0	3	0	0	0	10	18	0	0	0	0	0	0
GVVQLTSQWLTNIFG	GGTGTGGTACAATTGACTTCTCAATGGCTTACAAATATATTCGGC	0	GVVQLTSQWLTNIFG	0	1	1	0	0	0	1	0	0	4	0	0	3	0	0	13	11	15	5	0	0	8	16	1	2	0	0	2	0	0	0	0	0	0	1	0
VVQLTSQWLTNIFGT	GTTGTCCAACTAACCTCACAATGGTTAACTAACATCTTCGGTACT	0	VVQLTSQWLTNIFGT	0	0	0	0	0	0	0	0	0	0	0	0	1	0	0	17	27	20	1	8	0	18	18	2	0	2	0	3	2	0	0	0	0	0	2	0
VQLTSQWLTNIFGTV	GTCCAGCTCACCAGTCAATGGTTGACAAACATTTTCGGAACTGTC	0	VQLTSQWLTNIFGTV	0	0	0	0	0	0	0	0	0	0	0	0	0	0	0	17	23	14	3	1	0	12	12	0	0	0	0	2	0	0	0	0	0	0	0	0
QLTSQWLTNIFGTVY	CAATTGACCTCGCAGTGGCTAACTAATATCTTTGGTACGGTCTAC	0	QLTSQWLTNIFGTVY	0	1	0	2	1	1	2	2	1	0	1	1	0	0	0	17	10	12	7	48	46	8	9	0	2	10	14	11	18	69	1	8	4	4	7	24
LTSQWLTNIFGTVYE	TTGACGTCGCAATGGTTAACGAATATTTTCGGAACTGTTTATGAA	0	LTSQWLTNIFGTVYE	0	0	0	0	0	0	0	0	0	0	0	0	0	0	0	14	23	21	0	0	0	7	14	2	0	0	0	1	0	0	0	0	0	0	0	0
TSQWLTNIFGTVYEK	ACATCACAGTGGTTAACCAACATCTTCGGAACTGTGTATGAAAAG	0	TSQWLTNIFGTVYEK	0	0	0	3	0	0	2	0	0	3	0	0	1	0	0	17	33	17	4	1	1	10	23	0	1	0	1	0	1	2	2	0	0	0	0	1
SQWLTNIFGTVYEKL	TCACAGTGGTTGACCAATATATTTGGCACAGTTTACGAGAAGTTG	0	SQWLTNIFGTVYEKL	0	0	0	0	0	1	0	0	0	0	0	1	0	0	0	14	21	24	0	6	0	6	24	3	1	0	0	2	4	0	0	0	0	0	2	0
QWLTNIFGTVYEKLK	CAATGGCTCACTAACATCTTTGGCACAGTTTACGAGAAATTGAAG	0	QWLTNIFGTVYEKLK	0	0	0	1	0	0	0	0	0	0	0	0	0	0	0	15	11	13	2	0	0	10	8	0	1	2	0	0	0	0	0	0	0	1	1	0
WLTNIFGTVYEKLKP	TGGTTGACCAATATATTTGGTACTGTATATGAGAAGCTCAAGCCC	0	WLTNIFGTVYEKLKP	0	0	0	0	0	0	0	0	0	0	0	0	0	0	0	6	5	10	0	0	0	0	3	0	0	0	0	1	0	0	0	0	0	0	0	0
LTNIFGTVYEKLKPV	TTGACCAATATCTTCGGAACGGTATACGAGAAGTTGAAACCAGTT	0	LTNIFGTVYEKLKPV	0	0	0	0	0	1	0	0	0	0	0	0	0	0	0	26	20	17	3	0	4	13	12	0	2	0	1	0	0	8	3	0	2	1	0	3
TNIFGTVYEKLKPVL	ACCAACATTTTTGGTACAGTTTACGAAAAACTTAAACCTGTTCTA	0	TNIFGTVYEKLKPVL	0	0	0	5	0	0	12	0	0	16	0	0	3	0	0	18	14	11	19	3	6	3	16	1	24	0	0	22	2	5	15	1	0	20	0	0
NIFGTVYEKLKPVLD	AACATCTTTGGTACTGTGTATGAAAAATTGAAACCAGTCCTTGAT	0	NIFGTVYEKLKPVLD	0	0	1	4	0	0	12	0	0	16	0	0	2	0	0	12	14	10	9	7	4	16	20	0	2	0	0	10	5	6	1	1	0	0	1	0
IFGTVYEKLKPVLDW	ATTTTCGGCACTGTCTATGAAAAGTTAAAGCCAGTTTTGGATTGG	0	IFGTVYEKLKPVLDW	0	0	0	0	0	0	0	0	0	0	0	0	0	0	0	14	27	20	0	0	5	9	16	1	1	0	5	2	0	7	0	0	0	0	0	2
FGTVYEKLKPVLDWL	TTCGGCACCGTATACGAAAAATTGAAACCAGTGTTAGACTGGCTG	0	FGTVYEKLKPVLDWL	0	0	0	0	0	0	0	0	0	0	0	0	0	0	0	17	15	10	0	3	1	4	13	0	2	0	3	2	0	3	1	0	0	0	2	3
GTVYEKLKPVLDWLE	GGGACAGTTTATGAAAAGCTAAAACCGGTTCTAGATTGGCTTGAA	0	GTVYEKLKPVLDWLE	0	0	0	2	0	3	14	0	0	14	0	1	4	0	0	14	17	12	6	2	8	7	17	0	1	0	2	7	2	27	0	2	0	0	2	4
TVYEKLKPVLDWLEE	ACGGTCTACGAAAAATTAAAACCAGTTCTTGATTGGTTAGAGGAG	0	TVYEKLKPVLDWLEE	0	0	0	0	0	0	2	0	0	1	0	0	4	0	0	12	26	17	1	2	0	15	9	0	2	0	0	4	3	0	0	0	0	0	3	0
VYEKLKPVLDWLEEK	GTTTATGAAAAACTCAAGCCCGTCTTGGATTGGTTAGAAGAGAAG	0	VYEKLKPVLDWLEEK	0	0	1	0	0	0	0	0	0	0	0	0	0	0	0	10	33	15	1	2	6	8	22	0	0	0	2	1	0	5	0	0	1	1	0	1
YEKLKPVLDWLEEKF	TACGAAAAATTAAAGCCGGTGTTAGATTGGTTGGAGGAAAAGTTC	0	YEKLKPVLDWLEEKF	0	0	2	0	0	0	0	0	0	0	0	0	0	0	0	12	29	20	2	1	1	8	19	0	1	0	2	1	0	6	0	0	0	0	0	2
EKLKPVLDWLEEKFK	GAAAAATTGAAGCCCGTGTTGGATTGGTTAGAAGAAAAATTTAAA	0	EKLKPVLDWLEEKFK	0	0	0	0	2	0	0	0	0	0	0	0	0	0	0	17	22	4	2	0	3	13	11	0	0	0	1	0	0	3	1	0	3	0	0	3
KLKPVLDWLEEKFKE	AAATTGAAGCCAGTTTTGGACTGGCTAGAAGAAAAATTTAAGGAA	0	KLKPVLDWLEEKFKE	0	0	0	1	0	0	4	0	0	1	0	0	0	0	0	10	19	14	1	1	0	9	12	0	1	2	0	4	1	0	0	0	0	2	1	0
LKPVLDWLEEKFKEG	TTGAAACCAGTGTTAGATTGGTTGGAGGAAAAATTCAAAGAAGGA	0	LKPVLDWLEEKFKEG	0	0	0	0	0	1	0	4	2	0	4	2	0	0	1	20	15	11	0	1	10	8	21	1	1	0	4	1	1	14	0	0	6	2	0	3
KPVLDWLEEKFKEGV	AAACCAGTACTTGACTGGTTAGAAGAGAAGTTCAAAGAGGGCGTA	0	KPVLDWLEEKFKEGV	0	0	0	0	0	0	0	0	4	0	0	6	0	0	0	17	30	20	2	13	0	7	24	2	2	1	0	0	3	0	0	0	0	1	0	0
PVLDWLEEKFKEGVE	CCAGTACTTGATTGGTTGGAAGAGAAGTTTAAGGAGGGGGTTGAA	0	PVLDWLEEKFKEGVE	0	0	0	0	0	0	1	0	0	0	1	0	0	0	0	19	18	10	0	4	2	7	11	1	0	0	3	3	1	2	0	2	0	0	0	1
VLDWLEEKFKEGVEF	GTTTTAGATTGGTTAGAAGAAAAATTCAAGGAAGGTGTCGAATTT	0	VLDWLEEKFKEGVEF	0	0	0	1	0	1	6	0	0	1	0	0	1	0	0	13	25	22	2	2	2	8	16	0	1	1	0	0	2	2	0	0	0	1	0	0
LDWLEEKFKEGVEFL	CTGGATTGGTTAGAAGAAAAGTTCAAGGAAGGTGTAGAATTCTTA	0	LDWLEEKFKEGVEFL	0	0	0	0	5	0	0	2	0	0	1	0	0	1	0	17	21	8	1	2	2	5	6	0	2	0	1	0	7	5	0	0	1	0	0	0
DWLEEKFKEGVEFLR	GACTGGTTAGAGGAGAAATTCAAGGAAGGTGTTGAATTTTTACGA	0	DWLEEKFKEGVEFLR	0	0	0	2	0	0	0	0	0	0	0	0	0	0	0	11	15	15	4	0	0	14	16	0	2	0	0	5	2	0	0	0	0	2	1	0
WLEEKFKEGVEFLRD	TGGTTGGAGGAAAAATTTAAAGAAGGTGTGGAATTTCTCAGAGAT	0	WLEEKFKEGVEFLRD	0	0	1	0	0	3	0	0	1	0	0	1	0	0	3	15	19	11	1	7	2	8	18	0	0	1	8	1	4	5	0	0	2	1	0	1
LEEKFKEGVEFLRDG	CTAGAAGAAAAATTCAAAGAAGGTGTCGAATTTCTGAGAGATGGA	0	LEEKFKEGVEFLRDG	0	0	0	2	0	0	5	0	0	2	0	0	0	0	0	14	20	12	0	0	0	3	6	0	0	0	0	3	2	0	0	0	0	0	0	0
EEKFKEGVEFLRDGW	GAGGAAAAATTCAAAGAAGGAGTGGAATTCTTAAGAGATGGATGG	0	EEKFKEGVEFLRDGW	0	0	0	7	4	4	13	1	2	8	1	3	0	0	1	10	12	14	12	12	39	4	20	0	12	3	25	16	14	104	1	3	17	17	0	54
EKFKEGVEFLRDGWE	GAAAAGTTCAAAGAGGGTGTAGAATTTTTGCGTGACGGATGGGAA	0	EKFKEGVEFLRDGWE	0	0	0	8	1	0	23	0	0	22	0	0	2	0	0	16	14	16	27	3	4	4	9	0	7	1	2	27	2	9	6	0	3	17	0	2
KFKEGVEFLRDGWEI	AAATTTAAAGAAGGCGTTGAGTTTCTAAGAGATGGTTGGGAAATA	0	KFKEGVEFLRDGWEI	1	0	0	0	0	0	0	0	0	0	0	0	0	0	0	12	26	8	3	1	0	6	16	1	0	0	0	3	0	1	1	1	0	1	0	0
FKEGVEFLRDGWEIV	TTCAAAGAAGGTGTCGAATTTCTCAGAGATGGCTGGGAAATAGTT	0	FKEGVEFLRDGWEIV	0	0	0	12	0	8	16	1	13	22	0	6	5	0	1	12	29	25	32	15	5	8	23	1	24	0	2	28	10	10	13	0	0	40	1	2
KEGVEFLRDGWEIVK	AAGGAAGGAGTCGAGTTCTTGAGGGACGGTTGGGAAATCGTTAAG	0	KEGVEFLRDGWEIVK	0	0	0	16	0	5	38	0	19	55	0	24	18	0	24	22	29	40	53	14	10	4	14	0	36	4	5	43	4	49	19	3	1	50	5	4
EGVEFLRDGWEIVKF	GAAGGCGTTGAGTTCCTTCGAGATGGTTGGGAAATTGTCAAGTTT	0	EGVEFLRDGWEIVKF	0	0	0	1	0	29	11	0	42	13	0	32	1	0	5	15	20	16	27	12	3	4	15	1	28	3	1	39	18	11	8	3	0	39	5	3
GVEFLRDGWEIVKFI	GGAGTGGAATTCCTAAGGGACGGATGGGAAATTGTCAAGTTTATT	0	GVEFLRDGWEIVKFI	0	0	0	2	0	3	5	0	1	4	0	1	2	0	0	14	29	14	9	1	0	8	11	0	3	0	1	8	1	0	0	0	0	0	0	0
VEFLRDGWEIVKFIS	GTTGAATTTCTACGCGATGGGTGGGAAATTGTTAAATTTATCAGT	0	VEFLRDGWEIVKFIS	0	0	0	1	1	11	1	0	5	0	0	1	0	0	0	14	9	15	8	6	9	8	12	1	0	2	5	5	2	20	0	1	3	1	1	10
EFLRDGWEIVKFIST	GAATTTTTAAGAGACGGTTGGGAAATCGTTAAATTCATCTCCACT	0	EFLRDGWEIVKFIST	0	0	0	5	4	4	8	7	20	10	4	20	9	2	25	11	9	10	15	24	10	0	3	0	16	7	18	11	15	19	9	6	17	22	17	27
FLRDGWEIVKFISTC	TTCCTTAGAGATGGATGGGAAATCGTCAAATTCATTTCAACTTGC	0	FLRDGWEIVKFISTC	0	0	0	0	10	0	0	2	0	0	0	0	0	0	0	17	25	23	1	5	2	7	18	1	2	2	0	1	3	9	0	1	0	2	1	0
LRDGWEIVKFISTCA	CTGCGTGATGGCTGGGAAATTGTCAAATTCATAAGTACTTGTGCG	0	LRDGWEIVKFISTCA	0	0	0	3	1	26	4	0	19	0	0	4	1	0	1	14	25	23	6	15	4	5	15	0	2	4	0	14	8	2	3	2	0	7	5	1
RDGWEIVKFISTCAC	AGGGATGGGTGGGAGATAGTGAAATTTATTTCTACTTGCGCCTGT	0	RDGWEIVKFISTCAC	0	0	1	31	7	6	92	14	31	118	8	19	69	12	18	25	25	19	36	29	35	2	25	2	44	13	19	23	19	30	44	11	25	42	17	35
DGWEIVKFISTCACE	GACGGCTGGGAGATTGTCAAGTTTATATCTACATGTGCATGTGAA	0	DGWEIVKFISTCACE	0	0	0	5	41	6	4	73	27	3	68	36	5	43	36	8	10	9	15	24	8	1	5	0	33	10	10	16	11	14	35	10	15	20	12	32
GWEIVKFISTCACEI	GGTTGGGAAATTGTTAAATTTATTTCAACATGTGCCTGTGAAATA	0	GWEIVKFISTCACEI	0	1	0	0	0	0	0	0	0	0	0	0	0	0	0	12	16	16	2	3	1	7	23	0	1	0	0	3	1	3	0	1	1	4	0	4
WEIVKFISTCACEIV	TGGGAGATCGTCAAATTTATCAGTACCTGCGCCTGCGAGATCGTA	0	WEIVKFISTCACEIV	0	0	0	0	0	1	0	0	0	0	0	0	0	0	0	9	13	9	1	3	1	7	5	1	2	0	0	0	0	5	0	0	0	1	0	0
EIVKFISTCACEIVG	GAAATCGTTAAGTTTATTAGCACGTGTGCATGTGAAATAGTCGGA	0	EIVKFISTCACEIVG	0	0	0	18	2	29	52	7	74	32	2	46	18	2	31	15	33	19	28	32	57	6	19	0	21	9	19	24	27	95	11	4	23	17	13	39
IVKFISTCACEIVGG	ATTGTCAAATTTATTTCCACCTGTGCATGCGAGATCGTCGGTGGG	0	IVKFISTCACEIVGG	0	1	0	0	0	3	0	0	4	0	0	1	0	0	0	15	19	19	1	1	0	7	13	0	1	0	0	1	1	0	1	0	0	0	0	0
VKFISTCACEIVGGQ	GTAAAATTTATTTCTACATGTGCCTGCGAGATAGTCGGAGGTCAG	0	VKFISTCACEIVGGQ	0	0	0	0	0	5	0	0	16	0	0	4	0	0	0	12	23	16	15	5	3	17	23	0	0	0	4	9	6	10	1	0	2	5	0	6
KFISTCACEIVGGQI	AAGTTTATTAGTACTTGCGCTTGCGAAATCGTGGGTGGTCAGATA	0	KFISTCACEIVGGQI	0	0	1	25	10	10	57	8	38	59	1	22	13	0	10	26	37	27	51	34	33	5	17	2	48	6	31	38	25	58	18	2	4	52	9	28
FISTCACEIVGGQIV	TTTATTAGTACTTGTGCTTGTGAGATAGTAGGAGGACAAATCGTA	0	FISTCACEIVGGQIV	0	0	0	4	3	0	1	1	0	0	0	0	0	0	0	22	33	16	17	16	9	5	23	0	4	5	7	22	8	22	0	0	1	4	3	2
ISTCACEIVGGQIVT	ATTAGTACATGCGCGTGTGAAATCGTGGGTGGACAAATTGTTACC	0	ISTCACEIVGGQIVT	0	0	0	0	0	0	0	0	0	0	0	0	0	0	0	6	4	6	6	0	2	3	7	0	2	0	0	3	1	6	0	0	1	2	0	2
STCACEIVGGQIVTC	TCCACGTGTGCGTGCGAGATTGTCGGTGGTCAAATAGTTACATGC	0	STCACEIVGGQIVTC	0	0	0	6	0	2	2	0	1	0	0	1	0	0	0	14	31	22	12	15	6	7	15	0	1	1	1	17	11	11	1	0	0	0	0	2
TCACEIVGGQIVTCA	ACTTGCGCATGTGAAATCGTAGGAGGACAGATTGTGACCTGCGCA	0	TCACEIVGGQIVTCA	0	0	0	2	7	24	1	27	48	0	9	39	0	3	20	7	8	7	16	18	20	2	5	0	7	8	15	11	20	33	2	4	15	4	4	16
CACEIVGGQIVTCAK	TGTGCCTGTGAGATCGTCGGTGGACAAATTGTGACCTGTGCTAAG	0	CACEIVGGQIVTCAK	1	0	0	5	23	17	33	39	69	7	30	44	2	17	47	22	22	34	36	45	56	9	27	0	17	22	50	32	20	48	3	14	34	25	15	40
ACEIVGGQIVTCAKE	GCATGTGAGATTGTAGGGGGTCAGATTGTGACTTGCGCTAAGGAA	0	ACEIVGGQIVTCAKE	0	0	0	5	12	16	16	18	64	8	8	45	6	4	24	24	35	30	36	31	39	13	24	3	5	11	24	27	25	57	0	2	12	11	7	24
CEIVGGQIVTCAKEI	TGTGAAATAGTCGGGGGGCAAATTGTTACATGTGCTAAGGAAATT	0	CEIVGGQIVTCAKEI	0	0	0	7	54	37	18	121	130	15	152	97	3	57	56	12	18	15	43	63	58	11	28	0	19	49	72	33	26	68	3	33	46	25	36	108
EIVGGQIVTCAKEIK	GAAATTGTAGGTGGTCAGATTGTAACCTGTGCGAAGGAAATTAAA	0	EIVGGQIVTCAKEIK	1	0	0	13	29	29	24	49	44	22	78	64	9	56	69	17	14	13	30	59	104	8	16	0	26	59	132	32	20	55	5	84	135	27	63	106
IVGGQIVTCAKEIKE	ATAGTTGGTGGACAAATTGTAACCTGTGCTAAAGAGATCAAAGAA	0	IVGGQIVTCAKEIKE	0	1	0	7	6	9	16	9	15	10	1	5	0	0	2	17	31	17	14	25	16	9	25	0	4	8	3	18	33	20	1	3	1	8	7	9
VGGQIVTCAKEIKES	GTTGGTGGTCAAATAGTGACGTGCGCAAAGGAAATTAAGGAATCT	0	VGGQIVTCAKEIKES	0	0	0	5	19	2	5	6	4	2	0	0	0	0	0	26	27	32	13	12	4	6	20	2	2	1	0	13	7	4	0	0	0	5	0	3
GGQIVTCAKEIKESV	GGCGGTCAGATTGTTACGTGTGCAAAAGAAATAAAGGAGTCTGTA	0	GGQIVTCAKEIKESV	0	0	0	0	7	2	0	5	3	0	1	0	0	0	0	18	25	15	11	15	4	6	11	1	2	2	3	15	11	10	2	0	0	2	5	1
GQIVTCAKEIKESVQ	GGGCAGATCGTGACTTGCGCAAAAGAAATTAAAGAAAGTGTTCAA	0	GQIVTCAKEIKESVQ	0	0	0	5	1	8	4	1	15	7	1	5	0	0	2	11	18	9	21	23	10	6	14	1	4	4	3	24	14	20	1	2	0	8	0	7
QIVTCAKEIKESVQT	CAGATAGTGACTTGTGCGAAAGAAATAAAAGAATCAGTACAGACC	0	QIVTCAKEIKESVQT	0	0	0	0	0	0	0	0	0	0	0	0	0	0	0	6	8	8	5	1	0	2	3	0	0	1	2	3	3	0	0	0	1	1	1	1
IVTCAKEIKESVQTF	ATCGTTACTTGCGCTAAGGAGATTAAAGAATCTGTCCAAACCTTT	0	IVTCAKEIKESVQTF	0	0	0	0	0	4	0	0	1	0	0	2	0	0	0	18	25	24	1	3	1	7	22	0	3	0	0	1	5	5	0	0	0	3	2	1
VTCAKEIKESVQTFF	GTGACTTGTGCAAAAGAAATTAAGGAATCAGTTCAAACTTTTTTT	0	VTCAKEIKESVQTFF	0	0	0	0	8	0	0	8	0	0	1	0	0	4	0	17	15	8	6	8	13	9	19	1	1	0	4	2	4	30	0	0	4	2	0	0
TCAKEIKESVQTFFK	ACATGTGCTAAGGAAATTAAGGAAAGTGTGCAAACGTTTTTTAAG	0	TCAKEIKESVQTFFK	0	0	0	3	1	6	5	0	8	2	0	0	0	0	0	25	34	18	19	12	16	7	23	3	6	1	5	26	9	22	1	1	2	4	0	5
CAKEIKESVQTFFKL	TGCGCTAAAGAAATCAAGGAATCCGTTCAAACATTCTTCAAACTC	0	CAKEIKESVQTFFKL	0	0	0	0	0	2	0	0	4	0	0	3	0	0	0	10	16	10	1	3	0	7	18	1	1	0	0	1	1	0	0	1	0	0	0	0
AKEIKESVQTFFKLV	GCAAAAGAAATTAAAGAATCTGTCCAAACTTTTTTTAAGCTTGTT	0	AKEIKESVQTFFKLV	0	0	0	0	0	4	0	0	5	0	1	2	0	0	1	23	18	10	3	4	5	9	10	1	2	2	1	1	3	3	0	0	0	1	2	1
KEIKESVQTFFKLVN	AAGGAAATTAAGGAATCTGTTCAAACATTTTTTAAGTTGGTTAAT	0	KEIKESVQTFFKLVN	0	0	0	7	1	8	25	0	22	20	0	11	9	0	7	15	15	7	17	5	18	3	11	0	19	1	10	22	2	31	15	0	7	32	0	21
EIKESVQTFFKLVNK	GAAATCAAGGAATCCGTGCAAACATTCTTCAAGTTGGTGAATAAA	0	EIKESVQTFFKLVNK	0	0	0	1	3	4	3	5	5	2	1	3	0	1	5	18	24	17	6	2	8	12	20	2	1	0	0	9	2	26	0	0	1	1	2	2
IKESVQTFFKLVNKF	ATTAAAGAATCCGTTCAAACATTTTTTAAACTGGTAAATAAGTTT	0	IKESVQTFFKLVNKF	0	0	0	0	0	0	0	0	0	0	0	0	0	0	0	8	11	9	0	0	0	6	11	2	0	0	0	1	0	0	1	0	0	0	0	0
KESVQTFFKLVNKFL	AAAGAATCAGTGCAGACATTTTTTAAACTTGTGAATAAATTCCTT	0	KESVQTFFKLVNKFL	0	0	0	0	0	1	0	0	0	0	0	0	0	0	0	11	12	12	2	1	7	14	16	0	0	0	3	1	0	9	0	0	6	0	1	5
ESVQTFFKLVNKFLA	GAAAGCGTCCAAACTTTTTTTAAATTAGTCAATAAATTTTTGGCA	0	ESVQTFFKLVNKFLA	0	0	0	0	0	0	0	0	0	0	0	0	0	0	0	8	13	3	1	0	0	9	10	0	0	1	0	1	0	0	0	0	0	0	0	0
SVQTFFKLVNKFLAL	TCCGTCCAAACCTTCTTCAAATTGGTTAATAAATTTTTGGCACTC	0	SVQTFFKLVNKFLAL	0	0	1	0	0	3	0	0	8	0	0	3	0	0	1	8	9	5	0	0	3	5	8	1	0	0	1	1	0	6	1	0	0	1	0	1
VQTFFKLVNKFLALC	GTGCAGACATTCTTCAAATTAGTTAATAAATTTCTGGCGTTGTGT	0	VQTFFKLVNKFLALC	0	0	0	0	0	0	0	0	1	0	0	0	0	0	0	18	18	11	0	2	0	12	19	2	2	2	0	0	0	2	0	0	0	0	1	0
QTFFKLVNKFLALCA	CAAACATTCTTTAAGCTTGTGAATAAATTTTTAGCACTATGTGCT	0	QTFFKLVNKFLALCA	0	0	0	0	5	0	2	0	0	0	0	0	0	0	0	20	19	10	2	6	0	20	17	0	2	0	0	2	4	1	0	0	0	0	0	0
TFFKLVNKFLALCAD	ACGTTCTTTAAACTTGTTAACAAATTCTTGGCTTTGTGTGCCGAC	0	TFFKLVNKFLALCAD	0	0	0	0	0	0	0	0	0	0	0	0	0	0	0	5	9	4	1	1	0	9	8	0	0	1	0	0	0	0	0	0	0	0	0	0
FFKLVNKFLALCADS	TTTTTCAAACTGGTTAATAAATTTTTGGCCTTATGCGCTGACTCA	0	FFKLVNKFLALCADS	0	0	0	0	0	0	0	0	0	0	0	0	0	0	0	13	16	14	1	0	1	9	13	0	3	0	1	0	0	6	0	0	0	0	0	1
FKLVNKFLALCADSI	TTCAAGCTCGTTAACAAATTTTTGGCTTTGTGCGCCGATAGCATT	0	FKLVNKFLALCADSI	0	0	0	0	0	0	0	0	0	0	0	0	0	0	0	17	13	7	2	1	6	7	18	0	0	0	5	0	1	2	0	0	4	0	1	4
KLVNKFLALCADSII	AAATTGGTTAACAAGTTCTTAGCATTATGTGCAGACAGTATTATC	0	KLVNKFLALCADSII	0	0	0	6	6	0	3	6	1	1	4	0	1	0	0	17	17	13	8	31	6	2	10	0	3	16	7	9	9	15	0	2	7	1	10	7
LVNKFLALCADSIII	TTAGTTAACAAATTTCTAGCTCTATGTGCAGATTCAATAATAATT	0	LVNKFLALCADSIII	0	0	0	7	0	0	4	0	1	1	0	2	1	0	1	11	13	13	1	0	0	11	18	0	1	1	0	0	1	0	1	0	0	0	1	0
VNKFLALCADSIIIG	GTAAATAAATTTCTCGCATTATGTGCTGATTCAATCATAATTGGT	0	VNKFLALCADSIIIG	0	0	1	4	0	17	6	0	8	1	0	2	0	0	0	16	23	15	11	10	8	4	23	1	1	1	1	5	2	16	0	2	0	1	0	0
NKFLALCADSIIIGG	AATAAATTTTTGGCGCTGTGTGCAGACTCAATAATTATTGGCGGC	0	NKFLALCADSIIIGG	0	0	0	0	0	3	9	2	14	3	1	13	0	2	24	4	4	3	11	4	15	1	1	0	9	2	14	6	2	5	13	1	8	11	4	7
KFLALCADSIIIGGA	AAATTCTTAGCCTTATGTGCCGACTCTATAATCATCGGTGGTGCA	0	KFLALCADSIIIGGA	0	0	1	20	10	31	57	4	117	66	1	145	26	7	172	21	25	23	32	23	61	6	15	0	34	9	54	25	13	48	16	2	60	47	10	22
FLALCADSIIIGGAK	TTTCTTGCCTTGTGTGCAGACTCTATAATCATAGGCGGTGCGAAG	0	FLALCADSIIIGGAK	0	0	2	2	0	12	3	0	20	1	0	4	0	0	0	21	20	25	11	17	6	2	21	0	5	1	3	4	10	26	1	0	1	1	0	6
LALCADSIIIGGAKL	TTAGCTTTGTGCGCAGATAGCATAATAATTGGTGGCGCCAAGCTA	0	LALCADSIIIGGAKL	0	0	0	1	28	11	4	55	24	1	72	25	1	44	6	21	16	16	28	63	36	2	15	1	7	60	32	30	22	60	0	43	7	9	36	35
ALCADSIIIGGAKLK	GCTCTCTGTGCTGATTCGATAATCATCGGTGGTGCTAAATTAAAA	0	ALCADSIIIGGAKLK	0	0	0	13	7	7	19	7	8	26	4	3	1	0	2	14	21	26	36	13	9	7	23	0	13	4	10	26	16	7	8	4	2	16	8	6
LCADSIIIGGAKLKA	CTGTGCGCCGATTCTATAATTATTGGTGGGGCCAAACTGAAGGCC	0	LCADSIIIGGAKLKA	0	0	0	3	0	0	1	0	0	0	1	0	0	0	0	5	10	5	6	11	9	2	7	0	0	2	1	4	6	6	1	2	0	0	3	1
CADSIIIGGAKLKAL	TGTGCGGACAGCATAATTATCGGTGGGGCCAAACTGAAAGCGCTT	0	CADSIIIGGAKLKAL	0	0	0	0	3	1	0	6	3	0	1	3	0	1	4	18	21	16	4	41	24	14	19	1	2	6	6	6	27	48	2	5	1	1	4	6
ADSIIIGGAKLKALN	GCTGATTCCATTATAATTGGTGGTGCTAAATTGAAAGCGCTGAAT	0	ADSIIIGGAKLKALN	0	0	0	0	0	0	0	0	0	0	0	2	0	0	1	13	17	16	4	23	25	7	14	2	2	3	1	15	10	24	1	0	1	3	3	10
DSIIIGGAKLKALNL	GATTCCATTATTATCGGTGGGGCTAAATTAAAAGCATTGAATCTT	0	DSIIIGGAKLKALNL	0	0	0	0	4	2	1	2	1	0	0	0	0	0	0	29	22	10	8	31	9	16	20	1	2	6	1	9	22	16	0	0	0	0	10	6
SIIIGGAKLKALNLG	TCGATTATCATTGGTGGGGCAAAACTAAAGGCCTTGAATCTCGGG	0	SIIIGGAKLKALNLG	0	1	0	0	2	0	0	2	0	0	0	0	0	0	0	17	18	16	2	10	7	4	11	0	0	1	0	4	0	19	0	0	0	0	1	1
IIIGGAKLKALNLGE	ATTATAATTGGGGGTGCCAAACTAAAAGCATTAAACCTTGGTGAG	0	IIIGGAKLKALNLGE	0	0	0	0	0	0	0	0	0	0	0	0	0	0	0	20	19	17	2	1	4	8	11	0	1	1	1	0	0	7	0	1	2	0	0	0
IIGGAKLKALNLGET	ATCATAGGTGGTGCAAAATTAAAGGCATTGAATTTAGGCGAGACT	0	IIGGAKLKALNLGET	0	0	0	0	0	7	0	0	12	0	0	5	0	0	4	15	20	17	7	16	12	8	13	0	0	0	1	2	13	24	1	0	0	1	2	3
IGGAKLKALNLGETF	ATTGGTGGTGCGAAGTTGAAAGCACTAAATTTGGGTGAAACTTTC	0	IGGAKLKALNLGETF	0	0	0	1	24	10	5	46	50	3	64	45	0	83	17	13	19	14	20	109	35	2	16	1	16	113	32	18	14	28	11	182	25	39	49	32
GGAKLKALNLGETFV	GGCGGAGCTAAACTTAAGGCTCTAAATCTAGGTGAGACTTTTGTA	0	GGAKLKALNLGETFV	1	0	0	2	43	4	3	133	15	2	214	10	0	282	7	21	12	6	18	91	28	2	6	0	16	90	33	13	29	51	3	166	20	16	48	37
GAKLKALNLGETFVT	GGCGCAAAACTCAAGGCTCTAAACTTGGGCGAGACTTTCGTTACT	0	GAKLKALNLGETFVT	0	0	0	1	24	3	3	56	1	0	68	1	0	55	1	25	23	21	32	92	63	8	11	0	7	64	56	29	48	107	3	64	16	9	63	28
AKLKALNLGETFVTH	GCTAAGTTGAAAGCCCTGAATTTAGGAGAAACGTTTGTTACTCAT	0	AKLKALNLGETFVTH	0	0	0	4	50	12	8	86	24	3	122	18	4	78	13	27	24	13	33	152	64	19	20	1	12	114	38	28	41	91	4	118	24	14	85	57
KLKALNLGETFVTHS	AAGTTAAAGGCTCTGAACCTAGGAGAAACATTCGTAACTCATAGC	0	KLKALNLGETFVTHS	0	0	0	1	51	7	0	106	8	3	122	9	0	51	5	12	27	18	19	67	28	7	17	1	9	38	20	11	35	45	0	39	3	6	46	20
LKALNLGETFVTHSK	CTGAAAGCATTGAATTTGGGTGAGACATTCGTCACTCATAGTAAA	0	LKALNLGETFVTHSK	0	0	0	0	11	4	0	7	4	0	0	0	0	0	0	21	33	17	2	7	8	11	21	1	0	2	7	2	3	7	1	0	1	0	2	1
KALNLGETFVTHSKG	AAGGCTTTGAACCTGGGTGAGACCTTTGTCACTCATTCAAAGGGT	0	KALNLGETFVTHSKG	0	0	0	0	10	5	0	27	11	0	30	11	0	12	2	15	15	11	29	64	33	3	12	0	6	33	13	15	35	39	0	22	1	10	44	16
ALNLGETFVTHSKGL	GCACTAAACTTGGGAGAAACATTTGTAACGCATTCCAAGGGTCTA	0	ALNLGETFVTHSKGL	0	0	0	3	1	11	5	2	29	3	0	14	0	0	2	31	22	28	26	47	49	10	16	1	4	12	16	23	25	73	2	4	4	7	8	34
LNLGETFVTHSKGLY	CTTAACTTGGGCGAAACTTTCGTTACGCATTCTAAAGGTTTGTAT	0	LNLGETFVTHSKGLY	0	0	0	0	38	11	0	28	31	1	10	9	0	1	2	26	32	22	16	43	30	13	20	1	4	8	13	11	36	84	0	1	2	2	15	32
NLGETFVTHSKGLYR	AACCTGGGCGAAACCTTTGTTACCCATTCAAAAGGATTGTACCGA	0	NLGETFVTHSKGLYR	0	0	0	0	0	0	2	0	2	0	0	0	0	0	0	18	15	20	15	28	20	10	19	1	2	6	4	13	27	43	2	0	0	0	8	6
LGETFVTHSKGLYRK	CTTGGTGAGACATTCGTCACACACTCTAAAGGGCTATATCGTAAG	0	LGETFVTHSKGLYRK	0	0	0	0	0	1	0	0	1	0	0	1	0	0	0	16	25	15	7	17	7	16	24	0	1	0	0	2	8	20	1	1	3	2	3	5
GETFVTHSKGLYRKC	GGTGAAACTTTTGTAACCCATAGCAAGGGTCTTTACAGGAAATGT	0	GETFVTHSKGLYRKC	0	0	0	9	0	1	11	0	1	10	0	0	3	0	0	13	28	23	29	35	8	4	18	1	3	8	0	26	26	8	4	4	0	11	12	9
ETFVTHSKGLYRKCV	GAGACATTTGTCACGCACTCTAAGGGTTTATATAGGAAATGTGTT	0	ETFVTHSKGLYRKCV	1	0	0	7	8	6	19	19	8	11	19	2	5	12	1	11	29	27	30	36	4	4	14	1	11	6	0	23	24	16	0	4	4	19	16	3
TFVTHSKGLYRKCVK	ACCTTTGTTACTCACTCAAAGGGGTTGTATAGAAAATGCGTGAAG	0	TFVTHSKGLYRKCVK	0	0	0	3	0	0	2	0	0	1	0	0	1	0	0	22	20	24	1	2	2	14	13	0	0	0	0	3	0	0	0	0	0	1	0	1
FVTHSKGLYRKCVKS	TTCGTCACTCATAGTAAGGGTTTGTACAGAAAGTGTGTCAAAAGC	0	FVTHSKGLYRKCVKS	0	0	0	0	0	1	0	0	2	0	0	0	1	0	0	16	20	10	2	0	0	13	14	0	0	0	0	3	0	0	0	0	0	1	0	0
VTHSKGLYRKCVKSR	GTAACGCATTCTAAAGGTCTATACCGTAAATGTGTCAAAAGTAGA	0	VTHSKGLYRKCVKSR	0	0	0	0	0	3	0	0	0	0	0	0	0	0	0	23	12	29	2	4	7	11	18	0	1	1	11	1	1	5	2	0	2	0	0	4
THSKGLYRKCVKSRE	ACCCATTCTAAAGGTTTATATAGAAAATGTGTCAAATCTAGAGAG	0	THSKGLYRKCVKSRE	0	0	0	0	1	1	0	2	1	0	0	1	0	0	0	9	14	6	3	8	3	6	10	2	0	2	2	5	5	8	0	0	1	0	4	5
HSKGLYRKCVKSREE	CATAGTAAAGGTCTATACCGTAAATGCGTTAAGTCACGTGAGGAA	0	HSKGLYRKCVKSREE	0	0	0	0	0	0	0	0	0	0	0	0	0	0	2	16	33	24	5	5	1	12	16	0	2	1	0	3	3	2	3	1	0	2	1	1
SKGLYRKCVKSREET	TCTAAAGGGTTGTACAGAAAGTGTGTTAAGTCGAGAGAGGAGACC	0	SKGLYRKCVKSREET	0	0	0	0	0	0	0	0	0	0	0	0	0	0	0	3	3	5	1	3	1	4	11	0	1	0	0	0	1	6	0	0	0	1	0	0
KGLYRKCVKSREETG	AAGGGATTATACAGAAAATGTGTTAAATCTCGTGAGGAGACGGGT	0	KGLYRKCVKSREETG	0	0	0	0	2	0	0	1	1	0	2	0	0	0	0	16	22	17	0	1	7	12	15	0	1	0	0	2	1	8	0	0	0	2	2	0
GLYRKCVKSREETGL	GGCCTCTACAGAAAGTGTGTAAAGTCCCGCGAAGAAACAGGTCTA	0	GLYRKCVKSREETGL	0	0	0	8	2	0	2	1	0	4	0	1	2	1	0	22	36	21	4	5	1	19	22	0	3	0	0	1	2	0	2	2	0	3	0	0
LYRKCVKSREETGLL	CTATATCGTAAATGTGTTAAATCGAGGGAAGAAACAGGTCTTTTG	0	LYRKCVKSREETGLL	1	0	0	1	0	0	3	0	0	0	0	0	1	0	0	20	28	21	1	0	0	7	31	1	1	1	0	1	0	1	1	1	0	1	0	0
YRKCVKSREETGLLM	TACAGAAAGTGTGTTAAGTCACGAGAGGAAACTGGATTGTTAATG	0	YRKCVKSREETGLLM	0	0	0	0	0	0	5	0	0	0	0	0	0	0	0	13	20	23	4	2	0	9	16	0	1	0	0	1	1	0	0	1	0	1	0	1
RKCVKSREETGLLMP	AGAAAATGTGTCAAGAGTAGAGAGGAAACTGGACTGTTAATGCCA	0	RKCVKSREETGLLMP	0	0	0	0	1	7	0	1	12	0	0	9	0	0	4	5	16	13	6	7	12	4	18	1	6	0	2	6	3	18	1	1	0	3	0	3
KCVKSREETGLLMPL	AAATGCGTGAAATCTCGTGAAGAAACAGGCTTATTAATGCCCCTC	0	KCVKSREETGLLMPL	0	0	0	7	16	2	5	6	4	8	3	1	3	1	1	27	28	10	25	14	16	16	20	0	8	0	3	11	15	19	1	1	1	8	3	6
CVKSREETGLLMPLK	TGCGTAAAGTCCCGAGAGGAAACTGGCCTATTGATGCCATTAAAA	0	CVKSREETGLLMPLK	1	0	1	8	0	10	18	0	9	11	0	8	1	0	3	25	30	23	7	12	9	16	28	1	4	1	0	11	8	15	0	0	0	10	0	3
VKSREETGLLMPLKA	GTGAAATCAAGAGAAGAAACTGGTCTGTTGATGCCCCTAAAGGCT	0	VKSREETGLLMPLKA	0	0	0	0	1	18	0	0	36	0	0	38	0	0	8	13	16	25	7	40	43	8	14	0	2	3	20	15	25	35	0	7	14	4	7	37
KSREETGLLMPLKAP	AAGAGTAGGGAAGAAACCGGTCTTTTAATGCCGCTGAAAGCTCCT	0	KSREETGLLMPLKAP	1	0	0	0	2	2	4	6	10	1	16	12	0	23	4	17	17	8	9	26	50	8	12	2	1	7	31	14	19	52	1	2	20	6	12	31
SREETGLLMPLKAPK	TCACGCGAAGAGACAGGATTATTAATGCCGTTAAAAGCACCAAAG	0	SREETGLLMPLKAPK	0	0	0	0	9	5	0	9	7	0	1	3	0	0	0	13	21	17	13	25	64	10	12	0	0	6	40	12	19	87	0	1	19	0	5	35
REETGLLMPLKAPKE	AGGGAAGAAACTGGTCTTCTTATGCCACTCAAAGCCCCCAAGGAA	0	REETGLLMPLKAPKE	0	0	0	0	0	6	3	0	9	6	0	2	1	0	0	14	17	13	6	12	20	10	22	1	2	1	3	7	10	39	0	0	0	1	2	8
EETGLLMPLKAPKEI	GAAGAAACTGGTTTGTTGATGCCATTGAAAGCACCAAAGGAAATA	0	EETGLLMPLKAPKEI	0	0	0	1	1	2	3	0	0	2	0	0	5	0	0	16	19	17	9	19	10	10	18	0	4	1	6	12	11	36	5	0	2	1	1	7
ETGLLMPLKAPKEII	GAGACGGGCTTATTAATGCCGCTCAAAGCTCCTAAAGAAATCATA	0	ETGLLMPLKAPKEII	0	0	0	0	2	3	0	4	4	2	1	4	0	3	2	8	13	13	4	11	21	6	10	3	0	0	9	8	9	44	0	0	5	3	2	19
TGLLMPLKAPKEIIF	ACAGGACTGTTAATGCCTCTCAAGGCTCCAAAAGAAATTATATTC	0	TGLLMPLKAPKEIIF	0	0	0	0	1	5	0	3	4	0	2	4	0	9	0	11	12	7	3	16	15	8	7	0	0	0	14	4	2	22	0	1	5	0	1	13
GLLMPLKAPKEIIFL	GGTCTCTTAATGCCCTTGAAGGCCCCAAAGGAAATAATATTTCTA	0	GLLMPLKAPKEIIFL	0	0	0	2	2	2	7	0	2	9	0	5	1	0	0	16	20	13	5	10	10	3	18	0	3	2	3	5	17	20	0	0	1	1	2	13
LLMPLKAPKEIIFLE	CTTTTGATGCCATTAAAAGCACCTAAAGAGATCATTTTCCTAGAA	0	LLMPLKAPKEIIFLE	0	0	0	0	0	7	1	0	15	0	0	7	0	0	5	16	13	8	8	14	11	7	12	0	1	0	13	10	8	32	1	0	3	0	1	16
LMPLKAPKEIIFLEG	TTAATGCCGCTTAAAGCACCTAAAGAAATTATATTTCTGGAAGGA	0	LMPLKAPKEIIFLEG	0	0	0	1	0	0	0	0	0	0	0	0	0	0	0	6	11	9	13	8	8	5	13	0	0	0	5	7	1	16	0	0	7	2	0	8
MPLKAPKEIIFLEGE	ATGCCTCTGAAAGCACCCAAAGAGATTATTTTCTTAGAAGGTGAG	0	MPLKAPKEIIFLEGE	0	0	0	0	0	6	0	0	25	0	0	20	0	0	10	19	22	17	4	3	23	5	13	0	1	1	22	8	7	24	0	0	10	3	0	21
PLKAPKEIIFLEGET	CCACTGAAAGCACCTAAGGAAATTATCTTTTTAGAGGGAGAGACA	0	PLKAPKEIIFLEGET	0	0	0	0	0	12	0	0	33	0	0	27	0	0	9	10	17	6	6	2	19	7	9	0	2	1	11	15	0	38	4	0	12	6	0	24
LKAPKEIIFLEGETL	TTAAAGGCACCAAAAGAGATTATATTTTTAGAAGGTGAAACACTC	0	LKAPKEIIFLEGETL	0	0	0	8	3	1	14	0	5	21	0	2	12	1	0	12	13	8	28	3	13	4	10	0	40	0	9	10	3	12	34	2	4	33	3	14
KAPKEIIFLEGETLP	AAGGCTCCAAAAGAAATTATCTTCTTGGAAGGAGAAACATTGCCA	0	KAPKEIIFLEGETLP	0	0	0	6	1	8	13	0	22	24	1	19	15	0	4	12	13	8	31	7	23	0	20	0	44	0	7	9	5	36	36	0	5	30	1	16
APKEIIFLEGETLPT	GCCCCAAAAGAAATCATCTTCCTAGAAGGGGAAACTCTGCCAACG	0	APKEIIFLEGETLPT	0	0	0	0	0	3	0	0	18	0	0	17	0	0	15	8	2	1	7	1	12	0	3	0	4	1	8	7	0	14	0	0	6	1	0	8
PKEIIFLEGETLPTE	CCAAAAGAAATTATCTTTTTAGAAGGAGAAACACTTCCAACAGAG	0	PKEIIFLEGETLPTE	0	0	0	1	0	4	1	0	8	0	0	8	0	0	3	8	9	8	19	3	22	2	6	0	7	0	8	10	0	13	3	0	2	6	0	14
KEIIFLEGETLPTEV	AAAGAGATTATCTTTCTTGAAGGCGAAACCTTGCCAACAGAGGTA	0	KEIIFLEGETLPTEV	0	0	0	23	0	10	104	0	16	175	1	9	70	0	9	23	23	26	63	9	53	4	30	1	79	4	37	22	7	103	60	0	20	47	4	54
EIIFLEGETLPTEVL	GAAATAATTTTCTTGGAAGGTGAAACATTACCTACTGAAGTATTA	0	EIIFLEGETLPTEVL	0	0	1	12	6	30	39	2	71	33	1	64	4	1	29	28	17	14	28	5	19	7	20	0	14	3	27	27	8	30	8	0	23	33	3	31
IIFLEGETLPTEVLT	ATAATATTTCTTGAAGGAGAAACCCTCCCAACGGAGGTTTTGACC	0	IIFLEGETLPTEVLT	0	0	0	4	0	0	5	0	0	6	0	0	4	0	0	9	8	9	16	2	2	9	14	0	8	0	1	13	0	7	3	1	0	8	0	0
IFLEGETLPTEVLTE	ATATTTCTGGAAGGCGAGACTTTACCTACAGAAGTTTTAACAGAA	0	IFLEGETLPTEVLTE	0	0	0	10	0	2	38	0	7	32	1	3	10	0	3	19	25	16	31	3	3	6	20	0	21	0	4	29	4	4	9	0	0	29	3	0
FLEGETLPTEVLTEE	TTTCTTGAGGGCGAGACTTTGCCCACAGAAGTACTAACTGAAGAA	0	FLEGETLPTEVLTEE	0	0	1	0	2	0	0	5	0	1	1	0	0	1	0	19	22	26	29	6	1	10	14	0	5	0	0	27	4	11	1	0	0	4	0	0
LEGETLPTEVLTEEV	CTAGAAGGTGAAACTTTGCCAACGGAGGTATTGACGGAGGAAGTT	0	LEGETLPTEVLTEEV	0	0	0	10	1	4	9	0	15	4	0	10	0	0	2	7	13	12	15	4	11	3	15	0	9	2	14	8	4	28	0	2	7	9	0	12
EGETLPTEVLTEEVV	GAAGGTGAAACATTGCCTACTGAGGTCTTGACTGAAGAAGTTGTT	0	EGETLPTEVLTEEVV	0	0	0	8	1	27	30	0	74	45	1	112	38	1	102	24	23	18	36	16	38	4	23	1	55	0	22	19	13	29	38	0	21	47	2	13
GETLPTEVLTEEVVL	GGTGAAACCCTCCCCACAGAAGTTTTAACCGAAGAAGTAGTCCTT	0	GETLPTEVLTEEVVL	0	0	0	22	5	25	62	3	101	101	3	102	82	1	146	22	26	11	74	11	65	1	22	0	75	8	98	24	3	49	72	1	115	42	9	58
ETLPTEVLTEEVVLK	GAAACTTTGCCAACCGAAGTCCTTACAGAAGAAGTAGTACTGAAA	0	ETLPTEVLTEEVVLK	0	0	0	19	0	3	25	0	10	31	1	4	18	0	4	13	19	16	31	6	11	3	15	0	31	0	6	18	5	16	13	1	2	32	2	11
TLPTEVLTEEVVLKT	ACTTTGCCGACCGAAGTTTTGACCGAGGAAGTGGTGTTAAAGACG	0	TLPTEVLTEEVVLKT	0	0	0	0	0	0	0	0	1	0	0	0	0	0	0	9	14	12	14	7	16	8	13	0	5	0	14	19	3	29	0	0	1	8	0	14
LPTEVLTEEVVLKTG	CTGCCTACAGAAGTGCTTACTGAAGAAGTTGTATTAAAGACCGGT	0	LPTEVLTEEVVLKTG	0	0	0	1	0	0	4	0	0	0	0	0	0	0	0	7	6	12	12	8	3	4	6	1	4	4	1	14	6	15	0	0	2	3	1	1
PTEVLTEEVVLKTGD	CCAACAGAAGTGCTGACAGAAGAAGTTGTGCTTAAGACCGGCGAC	0	PTEVLTEEVVLKTGD	0	0	0	1	3	5	0	1	11	0	0	7	0	1	0	8	12	9	11	4	0	2	4	0	3	0	0	5	4	0	3	0	0	2	0	0
TEVLTEEVVLKTGDL	ACTGAAGTTCTTACCGAGGAGGTCGTTTTAAAAACTGGAGACTTG	0	TEVLTEEVVLKTGDL	0	0	0	13	0	14	11	4	43	8	4	44	1	2	15	6	9	11	21	18	18	4	7	0	10	9	12	12	11	25	2	8	7	14	13	13
EVLTEEVVLKTGDLQ	GAGGTATTGACTGAAGAGGTGGTGCTAAAGACGGGTGATTTACAA	0	EVLTEEVVLKTGDLQ	0	0	0	9	10	30	11	8	89	15	18	76	3	8	46	17	35	15	26	36	9	10	16	1	16	21	8	37	17	17	7	12	5	26	18	8
VLTEEVVLKTGDLQP	GTGCTTACTGAAGAAGTAGTCCTTAAGACAGGTGATCTACAGCCG	0	VLTEEVVLKTGDLQP	0	0	0	0	0	1	0	0	1	0	0	1	0	0	0	6	8	2	16	18	6	1	9	0	1	11	5	7	7	13	0	9	1	3	23	7
LTEEVVLKTGDLQPL	TTAACTGAAGAAGTGGTGCTTAAAACTGGCGATTTGCAACCGTTG	0	LTEEVVLKTGDLQPL	0	0	0	2	31	6	5	88	9	1	113	9	1	141	9	19	26	19	11	85	29	11	10	0	2	81	21	10	26	49	2	129	20	5	69	34
TEEVVLKTGDLQPLE	ACTGAAGAGGTAGTGTTAAAAACCGGGGATCTACAACCCCTAGAA	0	TEEVVLKTGDLQPLE	1	0	0	2	8	0	6	14	0	6	22	0	0	19	0	8	13	8	10	18	6	5	6	0	1	22	4	7	14	16	1	18	1	0	24	8
EEVVLKTGDLQPLEQ	GAAGAAGTCGTATTAAAAACAGGTGATTTGCAACCACTTGAGCAG	0	EEVVLKTGDLQPLEQ	0	0	0	0	36	4	0	75	5	0	128	3	2	86	1	12	12	13	4	61	14	4	6	0	0	50	14	6	24	28	1	62	6	2	40	9
EVVLKTGDLQPLEQP	GAGGTTGTTTTGAAAACTGGCGACCTTCAACCACTGGAACAGCCC	0	EVVLKTGDLQPLEQP	0	0	0	0	16	4	0	39	5	0	78	6	0	78	3	9	7	4	3	27	13	4	7	0	1	36	18	3	15	23	1	52	5	0	22	14
VVLKTGDLQPLEQPT	GTTGTCTTAAAAACAGGAGACCTGCAACCTTTAGAACAGCCAACT	0	VVLKTGDLQPLEQPT	0	0	0	2	0	8	3	0	10	1	0	2	2	0	0	10	8	7	11	12	13	8	15	0	1	3	3	8	14	17	0	7	2	2	4	12
VLKTGDLQPLEQPTS	GTTCTTAAGACAGGGGATCTCCAGCCTCTTGAACAGCCAACCTCT	0	VLKTGDLQPLEQPTS	0	0	0	0	0	0	0	0	0	0	0	0	0	0	0	7	5	6	6	3	4	2	4	0	1	1	3	2	4	8	0	0	0	0	2	1
LKTGDLQPLEQPTSE	TTGAAAACCGGCGATCTCCAACCTTTAGAACAACCTACTTCGGAA	0	LKTGDLQPLEQPTSE	0	0	0	0	0	3	0	0	5	0	0	6	0	0	0	10	11	5	6	4	5	1	9	0	0	0	3	4	1	7	0	0	2	0	0	1
KTGDLQPLEQPTSEA	AAAACAGGTGATCTACAACCATTGGAGCAACCAACTTCAGAAGCT	0	KTGDLQPLEQPTSEA	0	0	0	0	0	0	0	0	0	0	0	0	0	0	0	8	4	4	6	0	8	1	4	0	0	0	2	5	0	13	0	0	1	0	0	5
TGDLQPLEQPTSEAV	ACAGGTGATTTACAACCTTTGGAGCAACCAACATCTGAGGCAGTC	0	TGDLQPLEQPTSEAV	0	0	0	0	0	3	0	0	3	0	0	0	0	0	1	6	10	9	14	1	7	4	12	0	0	0	5	9	0	30	1	0	2	1	0	12
GDLQPLEQPTSEAVE	GGCGATCTTCAGCCACTAGAGCAACCGACTTCTGAAGCTGTCGAG	0	GDLQPLEQPTSEAVE	0	0	0	0	0	10	0	0	12	0	0	8	0	0	5	7	20	15	14	17	11	6	20	0	6	0	5	11	6	22	0	0	1	1	0	9
DLQPLEQPTSEAVEA	GATCTACAACCGCTAGAACAACCCACGTCAGAAGCAGTTGAAGCA	0	DLQPLEQPTSEAVEA	0	0	0	0	0	1	0	0	2	0	0	0	0	0	0	7	15	22	4	2	28	13	14	0	1	0	20	7	2	58	0	0	2	3	0	14
LQPLEQPTSEAVEAP	CTTCAACCACTGGAACAACCCACCTCAGAAGCTGTCGAAGCCCCC	0	LQPLEQPTSEAVEAP	0	0	0	0	0	0	0	0	0	0	0	0	0	0	0	1	1	1	0	0	1	1	4	0	0	0	0	1	2	4	0	0	0	0	0	0
QPLEQPTSEAVEAPL	CAACCTCTAGAACAGCCAACTTCTGAGGCTGTCGAGGCACCTTTA	0	QPLEQPTSEAVEAPL	0	0	0	0	0	0	0	1	1	0	5	0	0	2	0	12	12	12	6	4	9	8	6	0	1	1	0	6	3	16	0	0	0	1	1	3
PLEQPTSEAVEAPLV	CCATTGGAACAACCTACTTCTGAAGCAGTCGAAGCTCCGTTAGTC	0	PLEQPTSEAVEAPLV	0	0	0	1	0	0	1	0	0	0	0	0	1	0	1	19	20	13	8	3	0	8	16	0	1	0	0	8	5	0	0	0	0	2	1	0
LEQPTSEAVEAPLVG	CTAGAACAACCAACCTCAGAAGCCGTGGAAGCCCCATTAGTCGGT	0	LEQPTSEAVEAPLVG	0	0	0	0	0	2	0	0	0	0	0	0	0	0	0	13	28	20	4	4	4	9	13	0	5	1	1	6	3	8	0	0	0	3	0	4
EQPTSEAVEAPLVGT	GAACAACCCACAAGTGAGGCCGTTGAAGCCCCACTGGTAGGAACA	0	EQPTSEAVEAPLVGT	0	0	0	0	1	0	0	8	0	0	3	0	0	10	0	18	23	17	17	5	3	5	14	0	2	1	2	8	7	13	0	0	0	0	4	0
QPTSEAVEAPLVGTP	CAGCCAACATCTGAAGCCGTTGAAGCGCCATTGGTAGGTACCCCG	0	QPTSEAVEAPLVGTP	0	0	0	2	0	0	0	0	0	2	0	0	0	0	0	5	16	4	7	0	0	4	7	0	1	0	0	4	0	0	1	0	0	0	0	0
PTSEAVEAPLVGTPV	CCAACAAGTGAAGCTGTGGAAGCTCCGTTAGTTGGTACGCCAGTT	0	PTSEAVEAPLVGTPV	0	0	0	0	0	1	0	0	0	0	0	4	0	0	0	10	12	11	8	2	14	3	13	1	0	1	0	10	1	32	0	0	1	2	0	7
TSEAVEAPLVGTPVC	ACATCCGAAGCAGTAGAAGCTCCATTGGTGGGAACACCAGTATGC	0	TSEAVEAPLVGTPVC	0	0	0	4	8	8	15	18	31	14	8	29	6	2	21	8	6	15	14	22	27	2	6	1	17	5	20	13	11	27	9	5	21	10	14	33
SEAVEAPLVGTPVCI	AGCGAAGCCGTTGAAGCCCCATTAGTTGGTACACCAGTTTGCATC	0	SEAVEAPLVGTPVCI	0	0	0	0	2	10	1	2	30	0	3	24	0	0	22	12	18	18	15	15	11	3	9	0	11	6	19	14	9	16	3	6	17	14	5	15
EAVEAPLVGTPVCIN	GAGGCAGTTGAAGCCCCCTTAGTAGGCACCCCAGTTTGCATCAAT	0	EAVEAPLVGTPVCIN	0	0	0	10	10	2	14	13	6	16	5	2	3	2	0	23	27	21	35	41	18	10	14	0	22	10	10	25	24	25	3	1	2	17	13	10
AVEAPLVGTPVCING	GCAGTTGAAGCTCCACTAGTTGGTACACCAGTGTGTATCAATGGT	0	AVEAPLVGTPVCING	0	0	0	0	1	0	0	0	0	0	0	0	1	0	0	12	16	14	1	0	0	3	8	0	0	0	0	0	0	0	0	0	0	0	0	0
VEAPLVGTPVCINGL	GTAGAGGCTCCCCTGGTAGGGACTCCAGTGTGTATTAACGGATTA	0	VEAPLVGTPVCINGL	0	0	0	3	9	7	1	5	8	3	1	1	0	1	0	11	21	19	13	1	6	7	15	0	3	0	1	12	2	11	3	0	1	1	0	2
EAPLVGTPVCINGLM	GAAGCACCATTAGTTGGAACTCCAGTCTGTATCAATGGATTAATG	0	EAPLVGTPVCINGLM	0	0	0	3	29	26	8	23	59	9	14	31	2	4	9	16	31	22	23	26	20	7	17	0	11	16	6	19	26	19	2	6	4	10	11	17
APLVGTPVCINGLML	GCTCCTTTGGTAGGAACTCCAGTATGTATCAATGGTCTTATGCTA	0	APLVGTPVCINGLML	0	0	1	11	13	22	14	7	47	3	9	26	3	4	9	17	18	16	22	28	37	5	26	0	9	9	31	17	14	94	1	4	14	7	9	43
PLVGTPVCINGLMLL	CCATTAGTTGGTACCCCAGTGTGTATTAACGGTTTGATGCTATTA	0	PLVGTPVCINGLMLL	0	0	0	9	0	5	9	0	11	4	0	0	2	0	0	15	24	25	14	13	11	6	19	0	7	4	7	20	4	45	1	0	0	9	1	10
LVGTPVCINGLMLLE	TTGGTGGGGACCCCTGTTTGTATAAATGGCCTGATGCTATTGGAA	0	LVGTPVCINGLMLLE	0	0	0	3	8	3	4	11	3	1	2	5	0	0	0	13	31	20	21	13	14	16	16	0	5	2	5	18	4	31	1	1	0	1	2	6
VGTPVCINGLMLLEI	GTAGGCACCCCGGTATGTATTAATGGGCTTATGTTGCTGGAGATT	0	VGTPVCINGLMLLEI	0	0	0	2	0	10	4	0	8	1	0	5	0	0	0	20	20	20	16	18	24	7	13	0	3	4	5	13	16	38	0	3	3	11	10	17
GTPVCINGLMLLEIK	GGGACACCAGTGTGTATTAACGGATTGATGTTACTTGAAATTAAA	0	GTPVCINGLMLLEIK	0	0	0	3	1	5	1	0	8	0	0	11	0	0	4	4	14	11	4	12	17	5	8	1	3	2	11	9	10	27	0	1	7	3	2	18
TPVCINGLMLLEIKD	ACTCCTGTTTGCATAAATGGTTTAATGCTGCTAGAAATTAAAGAC	0	TPVCINGLMLLEIKD	0	0	0	2	8	15	4	5	49	2	3	46	1	1	27	19	17	9	15	24	27	9	14	0	2	6	41	12	21	42	1	6	15	7	6	52
PVCINGLMLLEIKDT	CCTGTTTGCATAAATGGTTTAATGTTACTTGAAATAAAAGACACC	0	PVCINGLMLLEIKDT	0	0	0	0	0	0	0	0	0	0	0	0	0	0	0	1	0	1	0	0	0	1	0	0	0	0	0	0	0	0	0	0	0	0	0	0
VCINGLMLLEIKDTE	GTCTGCATTAATGGGCTTATGTTACTTGAGATCAAGGATACTGAA	0	VCINGLMLLEIKDTE	0	0	0	2	13	24	0	26	54	0	15	41	1	5	44	22	31	18	18	34	33	8	17	1	10	24	29	22	25	72	2	16	25	11	26	34
CINGLMLLEIKDTEK	TGTATAAATGGTTTAATGCTATTAGAGATAAAGGACACCGAAAAA	0	CINGLMLLEIKDTEK	0	0	0	0	2	4	0	7	5	0	6	3	0	4	3	13	13	8	5	14	14	4	11	0	2	8	1	7	17	24	1	5	0	1	3	4
INGLMLLEIKDTEKY	ATTAATGGCCTTATGTTGCTCGAGATTAAAGATACTGAAAAATAT	0	INGLMLLEIKDTEKY	0	0	0	0	3	2	0	3	4	0	0	3	0	1	0	27	20	16	7	11	18	7	12	0	1	7	9	8	9	27	0	1	2	0	7	10
NGLMLLEIKDTEKYC	AATGGTCTAATGTTGTTAGAAATCAAAGATACTGAAAAGTACTGT	0	NGLMLLEIKDTEKYC	0	0	0	7	22	13	12	42	21	18	48	26	3	32	13	15	24	16	28	72	26	8	27	0	6	39	11	23	33	15	1	43	17	7	43	13
GLMLLEIKDTEKYCA	GGTTTAATGTTGTTAGAGATTAAGGACACCGAAAAGTATTGTGCG	0	GLMLLEIKDTEKYCA	0	1	0	5	52	7	2	78	28	0	91	16	1	48	5	22	22	18	12	23	39	6	14	0	5	25	25	8	11	48	0	22	16	3	19	30
LMLLEIKDTEKYCAL	TTGATGTTACTCGAAATAAAAGACACGGAGAAATACTGTGCCCTC	0	LMLLEIKDTEKYCAL	0	0	0	5	3	3	6	0	6	3	1	9	0	0	2	8	7	5	13	15	21	7	5	0	5	21	11	11	5	26	1	8	4	3	12	17
MLLEIKDTEKYCALA	ATGCTACTAGAAATTAAGGACACTGAAAAGTACTGCGCTCTGGCA	0	MLLEIKDTEKYCALA	0	0	0	6	22	12	8	69	49	2	111	45	2	65	16	22	28	20	20	77	35	5	27	0	18	84	25	28	22	45	3	70	12	19	50	42
LLEIKDTEKYCALAP	CTACTTGAAATTAAGGATACCGAAAAATATTGTGCACTTGCTCCT	0	LLEIKDTEKYCALAP	0	0	0	37	37	9	102	92	19	127	150	18	52	130	28	15	12	11	33	71	13	3	21	0	46	78	3	23	13	17	27	111	7	47	54	13
LEIKDTEKYCALAPN	CTTGAAATCAAAGACACAGAAAAATATTGTGCTCTAGCACCTAAT	0	LEIKDTEKYCALAPN	0	0	0	28	11	8	77	31	38	155	20	35	118	6	28	13	13	8	15	51	25	1	9	0	33	24	13	6	24	31	54	21	19	10	30	16
EIKDTEKYCALAPNM	GAAATTAAAGACACAGAAAAGTACTGCGCCTTGGCGCCTAACATG	0	EIKDTEKYCALAPNM	0	0	0	21	23	38	58	55	142	112	113	175	111	77	218	20	25	15	47	93	85	0	14	0	101	117	120	11	32	29	102	144	155	24	65	39
IKDTEKYCALAPNMM	ATCAAGGATACAGAAAAATATTGTGCTTTGGCTCCCAATATGATG	0	IKDTEKYCALAPNMM	0	0	1	15	18	13	16	44	39	41	71	44	51	78	60	17	19	10	44	161	64	0	13	0	75	128	116	8	40	16	87	235	180	28	80	32
KDTEKYCALAPNMMV	AAAGATACAGAGAAATATTGTGCATTGGCTCCTAATATGATGGTC	0	KDTEKYCALAPNMMV	0	0	0	16	3	12	44	6	29	133	8	29	154	12	19	11	13	13	45	81	43	1	8	1	79	38	46	7	29	54	103	36	34	22	41	56
DTEKYCALAPNMMVT	GACACAGAAAAGTATTGCGCTTTAGCCCCAAATATGATGGTCACT	0	DTEKYCALAPNMMVT	0	0	0	7	3	17	26	10	65	46	8	65	63	12	73	8	14	8	25	52	41	0	16	0	63	26	80	8	19	45	107	32	47	19	15	63
TEKYCALAPNMMVTN	ACGGAAAAGTATTGTGCTTTAGCTCCTAATATGATGGTTACAAAT	0	TEKYCALAPNMMVTN	0	1	0	21	36	43	88	87	120	131	72	126	183	57	64	17	26	23	77	75	87	0	18	2	123	58	72	9	44	81	184	34	68	25	50	68
EKYCALAPNMMVTNN	GAAAAGTACTGCGCATTGGCTCCAAATATGATGGTGACAAATAAC	0	EKYCALAPNMMVTNN	0	0	0	20	33	15	61	82	74	140	79	72	156	74	58	15	17	15	44	66	50	1	14	0	85	34	54	6	31	41	94	44	42	24	38	55
KYCALAPNMMVTNNT	AAGTATTGCGCCTTGGCTCCAAATATGATGGTAACTAATAATACT	0	KYCALAPNMMVTNNT	0	0	0	30	12	29	70	27	75	161	18	75	133	10	89	20	23	12	66	72	44	0	17	0	101	45	75	11	46	54	98	27	47	30	42	84
YCALAPNMMVTNNTF	TATTGCGCCCTGGCACCTAATATGATGGTAACTAATAATACTTTT	0	YCALAPNMMVTNNTF	0	0	0	12	35	36	40	54	56	77	63	56	30	33	73	13	18	15	36	52	47	2	10	0	63	49	31	17	26	31	51	28	47	32	39	27
CALAPNMMVTNNTFT	TGTGCTTTGGCCCCAAATATGATGGTCACCAATAATACTTTTACG	0	CALAPNMMVTNNTFT	0	0	0	0	1	7	2	7	10	0	4	1	0	1	0	17	21	14	11	25	31	3	10	0	3	0	24	17	16	69	0	3	7	1	8	26
ALAPNMMVTNNTFTL	GCACTGGCCCCAAATATGATGGTGACTAATAATACTTTTACTCTG	0	ALAPNMMVTNNTFTL	0	0	0	0	6	5	2	5	16	4	0	5	1	1	2	13	17	14	11	17	21	12	15	0	3	6	13	8	19	48	0	2	9	4	2	29
LAPNMMVTNNTFTLK	TTAGCGCCAAATATGATGGTCACAAACAACACATTCACATTAAAA	0	LAPNMMVTNNTFTLK	0	0	0	0	0	3	4	0	13	3	0	8	0	0	3	17	20	17	11	16	32	6	11	2	1	1	17	15	10	20	1	0	1	4	4	10
APNMMVTNNTFTLKG	GCTCCGAATATGATGGTGACCAACAATACTTTTACATTAAAAGGA	0	APNMMVTNNTFTLKG	0	0	0	1	11	7	1	6	19	2	5	13	0	1	2	7	17	9	15	26	34	8	18	0	0	5	52	15	24	64	0	2	18	1	4	68
PNMMVTNNTFTLKGG	CCAAATATGATGGTAACCAACAACACATTCACTCTGAAAGGCGGG	0	PNMMVTNNTFTLKGG	0	0	0	0	1	4	2	2	7	0	1	7	1	0	0	8	19	16	23	22	32	11	11	1	4	4	27	24	16	45	1	1	10	7	4	24
NMMVTNNTFTLKGGA	AACATGATGGTCACTAACAACACGTTTACATTGAAGGGTGGTGCC	0	NMMVTNNTFTLKGGA	0	0	0	0	2	7	0	3	14	0	0	5	1	0	0	6	10	8	7	8	38	5	5	0	2	5	19	8	16	43	0	0	13	4	8	41
MMVTNNTFTLKGGAP	ATGATGGTAACTAATAATACATTTACACTAAAAGGCGGCGCCCCC	0	MMVTNNTFTLKGGAP	0	0	0	0	0	0	0	0	0	0	0	0	0	0	0	0	1	0	1	0	0	0	0	0	0	0	0	0	0	0	0	0	0	0	0	0
MVTNNTFTLKGGAPT	ATGGTGACGAATAATACATTTACTTTGAAGGGGGGCGCCCCAACC	0	MVTNNTFTLKGGAPT	0	0	0	0	0	0	1	0	0	0	0	0	1	0	0	5	6	1	5	0	0	1	3	0	3	0	0	3	2	0	0	0	0	2	0	0
VTNNTFTLKGGAPTK	GTGACTAACAATACTTTCACGTTGAAGGGTGGTGCACCCACAAAA	0	VTNNTFTLKGGAPTK	0	0	0	1	0	0	1	0	5	0	0	1	0	0	1	17	21	17	16	42	8	10	24	0	5	4	3	13	34	18	0	3	2	9	8	3
TNNTFTLKGGAPTKV	ACTAACAACACTTTTACTTTGAAAGGCGGCGCGCCCACTAAGGTG	0	TNNTFTLKGGAPTKV	0	0	0	0	0	0	0	0	0	0	0	0	0	0	0	0	5	1	0	0	4	0	0	0	0	0	4	0	1	2	0	0	0	0	2	1
NNTFTLKGGAPTKVT	AATAACACATTCACATTGAAAGGTGGTGCTCCTACTAAAGTTACT	0	NNTFTLKGGAPTKVT	0	0	0	1	6	1	1	3	1	0	3	0	0	0	0	17	22	15	12	20	10	17	17	0	2	3	3	1	9	16	0	0	0	7	4	3
NTFTLKGGAPTKVTF	AATACTTTCACATTAAAGGGTGGAGCACCAACTAAGGTAACATTT	0	NTFTLKGGAPTKVTF	0	0	0	3	0	0	1	0	0	0	0	0	0	0	0	9	10	11	5	18	0	2	5	0	0	1	0	4	9	0	1	0	0	1	4	0
TFTLKGGAPTKVTFG	ACATTCACTTTGAAAGGTGGAGCACCCACTAAGGTCACATTTGGC	0	TFTLKGGAPTKVTFG	0	0	0	0	0	0	0	0	0	0	0	0	0	0	0	9	20	15	5	18	4	5	10	1	1	0	3	6	15	15	1	2	1	4	2	1
FTLKGGAPTKVTFGD	TTCACCCTTAAAGGAGGTGCCCCCACCAAAGTTACATTCGGTGAC	0	FTLKGGAPTKVTFGD	0	0	0	0	0	0	0	0	0	0	0	0	0	0	0	12	13	21	7	0	4	4	8	0	1	1	2	4	0	4	0	0	0	0	0	1
TLKGGAPTKVTFGDD	ACCTTAAAGGGTGGAGCTCCTACTAAAGTAACTTTTGGTGATGAT	0	TLKGGAPTKVTFGDD	1	0	0	0	0	2	0	0	1	0	0	0	0	0	0	23	23	22	9	7	5	16	16	1	2	2	3	9	9	7	1	1	0	5	0	1
LKGGAPTKVTFGDDT	CTGAAGGGTGGTGCTCCAACCAAAGTCACGTTTGGTGACGATACA	0	LKGGAPTKVTFGDDT	0	0	0	2	2	0	4	0	0	2	0	0	0	1	1	11	20	23	7	1	2	7	11	3	0	1	2	7	1	2	1	3	1	3	1	1
KGGAPTKVTFGDDTV	AAAGGTGGTGCACCGACGAAAGTTACTTTTGGCGATGACACGGTT	0	KGGAPTKVTFGDDTV	0	0	0	14	0	0	35	0	0	42	0	0	14	0	0	16	22	24	25	8	2	7	12	4	32	2	4	13	4	19	27	0	1	39	3	2
GGAPTKVTFGDDTVI	GGGGGTGCTCCCACTAAAGTTACATTCGGCGATGATACGGTTATA	0	GGAPTKVTFGDDTVI	0	0	0	30	4	0	65	0	3	100	0	0	49	0	0	17	14	17	54	8	7	6	15	2	65	0	2	15	5	9	69	0	0	41	5	1
GAPTKVTFGDDTVIE	GGAGCACCAACAAAAGTGACCTTTGGTGATGATACTGTCATTGAA	0	GAPTKVTFGDDTVIE	0	0	0	2	5	0	16	1	0	19	1	0	3	2	0	13	21	17	40	1	2	3	14	1	28	0	2	30	0	10	12	1	1	40	0	4
APTKVTFGDDTVIEV	GCTCCGACCAAGGTTACTTTCGGCGACGACACTGTTATTGAAGTC	0	APTKVTFGDDTVIEV	0	0	0	0	0	0	0	0	0	0	0	0	0	0	0	20	20	25	12	4	2	9	15	0	0	0	0	9	2	8	0	0	0	3	1	1
PTKVTFGDDTVIEVQ	CCGACAAAGGTCACCTTTGGTGATGATACGGTTATTGAAGTTCAA	0	PTKVTFGDDTVIEVQ	0	0	1	0	0	7	7	0	27	10	0	18	3	1	6	12	35	9	24	9	0	10	24	1	5	0	0	30	4	0	2	0	0	13	0	0
TKVTFGDDTVIEVQG	ACTAAGGTAACTTTCGGGGACGACACGGTTATTGAGGTTCAAGGT	0	TKVTFGDDTVIEVQG	0	0	0	1	0	0	4	0	0	6	0	0	0	0	1	9	20	13	17	17	20	9	10	0	6	0	15	22	8	52	1	0	0	11	1	17
KVTFGDDTVIEVQGY	AAGGTTACATTCGGGGATGATACTGTGATAGAAGTGCAAGGATAT	0	KVTFGDDTVIEVQGY	0	0	0	3	19	12	9	25	34	4	9	22	0	3	9	26	23	33	28	44	59	7	22	0	23	10	43	25	22	75	1	6	18	18	14	56
VTFGDDTVIEVQGYK	GTTACATTTGGTGACGACACTGTCATAGAAGTCCAAGGTTACAAA	0	VTFGDDTVIEVQGYK	0	0	0	1	3	4	0	1	10	1	1	5	0	0	2	9	23	13	32	23	20	7	22	0	4	10	19	24	25	32	0	2	14	5	16	26
TFGDDTVIEVQGYKS	ACTTTTGGTGACGATACTGTCATAGAAGTTCAAGGTTACAAGAGT	0	TFGDDTVIEVQGYKS	0	0	0	11	13	31	14	29	77	21	23	68	3	10	22	18	28	23	42	52	39	2	14	1	46	26	54	17	26	59	29	17	21	56	35	60
FGDDTVIEVQGYKSV	TTCGGAGATGATACGGTAATTGAAGTGCAGGGTTATAAGTCCGTG	0	FGDDTVIEVQGYKSV	0	0	0	1	39	36	6	71	130	1	106	151	3	34	120	16	14	16	12	75	49	12	6	1	6	53	62	21	28	38	3	35	66	6	44	58
GDDTVIEVQGYKSVN	GGTGACGACACTGTTATCGAAGTCCAAGGATACAAGTCGGTTAAT	0	GDDTVIEVQGYKSVN	1	0	0	0	58	37	1	167	105	0	222	123	2	290	188	18	24	20	16	89	85	14	14	1	2	107	112	18	29	66	2	114	101	5	58	58
DDTVIEVQGYKSVNI	GACGATACTGTAATCGAAGTTCAAGGGTATAAGTCTGTTAATATA	0	DDTVIEVQGYKSVNI	0	0	0	0	27	10	0	33	68	1	71	52	1	74	74	17	20	13	27	78	45	14	17	0	4	74	77	17	23	34	3	86	58	6	64	55
DTVIEVQGYKSVNIT	GACACTGTAATAGAGGTCCAAGGTTATAAGTCAGTTAATATTACC	0	DTVIEVQGYKSVNIT	0	0	0	0	0	5	0	7	17	0	4	23	0	3	5	3	6	4	11	9	2	0	6	0	9	4	3	2	3	2	3	2	3	14	5	6
TVIEVQGYKSVNITF	ACTGTGATAGAAGTCCAAGGTTACAAATCCGTTAACATAACATTT	0	TVIEVQGYKSVNITF	0	0	1	3	12	36	2	25	71	2	13	46	0	0	39	22	19	16	27	31	40	10	23	4	17	12	20	30	20	40	1	4	19	20	10	20
VIEVQGYKSVNITFE	GTTATCGAGGTGCAAGGATATAAAAGTGTTAACATTACATTTGAA	0	VIEVQGYKSVNITFE	0	0	0	2	12	10	3	11	11	0	3	4	1	0	0	16	16	26	22	13	4	11	17	2	9	5	1	19	13	11	0	3	0	5	7	4
IEVQGYKSVNITFEL	ATCGAAGTGCAAGGCTATAAAAGTGTAAATATAACGTTTGAACTT	0	IEVQGYKSVNITFEL	0	0	0	1	11	3	1	14	5	1	9	0	0	2	2	26	25	14	18	31	9	9	22	0	8	11	2	20	8	26	0	5	2	7	16	4
EVQGYKSVNITFELD	GAAGTTCAGGGTTACAAAAGTGTAAACATTACTTTCGAATTAGAC	0	EVQGYKSVNITFELD	0	0	0	6	12	12	4	26	12	8	15	26	1	10	5	15	26	9	25	56	20	7	19	0	14	26	10	12	27	22	6	21	4	23	34	12
VQGYKSVNITFELDE	GTTCAGGGCTATAAATCAGTTAATATAACTTTTGAGTTAGATGAG	0	VQGYKSVNITFELDE	0	0	0	12	0	1	28	0	5	35	0	11	13	0	1	10	26	14	22	9	12	4	12	2	15	1	4	10	7	22	4	0	3	21	1	7
QGYKSVNITFELDER	CAAGGTTATAAGTCCGTAAACATTACCTTTGAATTAGATGAGCGA	0	QGYKSVNITFELDER	0	0	0	11	0	3	11	0	7	10	0	1	3	0	0	9	11	12	11	9	3	5	14	0	10	0	5	5	4	7	3	0	0	13	0	2
GYKSVNITFELDERI	GGTTATAAGTCCGTTAATATCACATTTGAACTTGATGAACGTATT	0	GYKSVNITFELDERI	0	0	0	3	3	5	17	1	8	12	0	2	3	0	0	24	18	26	34	9	7	11	17	0	35	2	1	36	8	24	16	4	0	34	4	6
YKSVNITFELDERID	TACAAAAGTGTGAATATAACATTTGAATTGGATGAACGTATCGAT	0	YKSVNITFELDERID	0	0	0	1	3	1	0	3	2	0	3	1	1	0	0	12	22	18	22	11	15	11	19	2	10	0	4	31	3	39	2	0	2	12	2	7
KSVNITFELDERIDK	AAGTCAGTTAATATCACTTTCGAATTGGATGAGAGAATAGACAAA	0	KSVNITFELDERIDK	0	0	0	3	0	0	2	0	1	1	0	2	0	0	2	18	15	6	19	19	6	12	12	1	3	2	1	9	7	13	1	2	0	3	3	1
SVNITFELDERIDKV	TCGGTCAACATAACTTTTGAGCTTGATGAGCGCATTGATAAGGTG	0	SVNITFELDERIDKV	0	0	0	3	0	0	12	0	0	15	0	0	2	0	0	12	25	22	28	13	8	10	17	1	12	2	0	26	7	6	3	0	0	15	0	0
VNITFELDERIDKVL	GTTAATATCACATTTGAGCTTGACGAAAGGATTGACAAGGTTCTT	0	VNITFELDERIDKVL	0	0	0	11	5	0	17	3	0	28	8	0	14	3	1	18	19	20	28	11	8	6	10	0	23	1	0	22	4	13	4	0	1	16	2	4
NITFELDERIDKVLN	AATATTACTTTTGAGCTCGACGAGAGGATAGACAAAGTACTGAAT	0	NITFELDERIDKVLN	0	0	0	12	7	13	44	12	21	20	10	22	6	5	3	22	25	19	34	32	47	7	18	0	21	1	28	20	21	54	4	3	17	12	6	40
ITFELDERIDKVLNE	ATCACATTTGAATTGGACGAACGAATAGATAAGGTGCTCAATGAA	0	ITFELDERIDKVLNE	0	0	0	6	1	14	5	0	25	1	1	23	0	0	11	22	23	16	29	9	24	18	14	1	9	1	17	18	8	41	1	0	2	7	1	11
TFELDERIDKVLNEK	ACATTTGAGTTAGATGAGCGAATTGATAAGGTGCTAAATGAAAAA	0	TFELDERIDKVLNEK	0	0	0	8	0	15	33	0	16	11	0	19	4	0	7	18	15	12	12	5	12	9	20	1	2	1	8	16	2	23	1	0	5	3	0	21
FELDERIDKVLNEKC	TTTGAATTGGATGAGCGAATCGACAAGGTTTTAAATGAAAAATGT	0	FELDERIDKVLNEKC	0	0	0	1	8	15	9	13	21	8	6	12	4	2	12	11	20	7	23	12	13	9	10	1	11	9	10	19	13	14	8	3	3	23	10	2
ELDERIDKVLNEKCS	GAATTGGATGAAAGAATTGATAAGGTCTTAAACGAAAAATGTAGC	0	ELDERIDKVLNEKCS	0	0	0	4	6	8	10	7	18	20	2	18	5	2	11	8	6	8	14	20	3	0	12	0	17	3	3	21	12	14	6	5	1	12	6	6
LDERIDKVLNEKCSA	TTAGATGAAAGAATCGACAAAGTCCTAAACGAAAAATGCTCAGCT	0	LDERIDKVLNEKCSA	0	0	0	9	18	3	29	26	9	32	15	12	6	13	9	8	14	13	28	29	4	2	11	1	22	10	2	11	19	12	11	6	1	15	24	4
DERIDKVLNEKCSAY	GACGAGAGAATTGATAAAGTGTTGAACGAAAAGTGCTCAGCTTAT	0	DERIDKVLNEKCSAY	0	0	1	24	50	22	53	103	97	73	154	110	75	107	152	20	26	19	52	106	72	2	12	0	66	82	114	20	39	40	57	116	104	33	56	52
ERIDKVLNEKCSAYT	GAAAGAATAGACAAAGTTCTTAACGAAAAATGCTCTGCATATACG	0	ERIDKVLNEKCSAYT	1	0	0	12	8	35	27	19	101	31	17	107	47	23	176	9	17	13	29	54	35	0	11	0	53	47	25	6	13	14	53	50	28	28	26	14
RIDKVLNEKCSAYTV	AGGATTGACAAAGTTCTTAATGAGAAATGTTCCGCGTACACCGTT	0	RIDKVLNEKCSAYTV	0	0	0	12	7	20	32	12	43	61	10	59	39	10	41	5	12	4	32	35	22	3	14	2	47	23	42	15	19	21	43	14	23	34	18	28
IDKVLNEKCSAYTVE	ATAGATAAAGTTCTTAATGAGAAATGTTCTGCATATACCGTGGAG	0	IDKVLNEKCSAYTVE	0	0	0	7	1	2	1	3	1	0	0	1	0	0	0	13	16	10	5	2	7	5	13	0	2	3	0	4	2	9	2	0	0	5	1	0
DKVLNEKCSAYTVEL	GATAAAGTGTTAAACGAAAAGTGTTCAGCTTATACGGTTGAATTA	0	DKVLNEKCSAYTVEL	0	0	0	8	22	9	11	60	13	15	57	21	7	37	4	24	27	18	43	53	31	7	24	4	32	39	10	29	28	52	17	34	6	29	34	24
KVLNEKCSAYTVELG	AAAGTACTGAACGAGAAGTGTTCGGCTTATACCGTGGAATTGGGT	0	KVLNEKCSAYTVELG	0	0	0	31	17	17	133	33	54	137	29	37	71	13	13	20	33	28	63	51	42	4	23	2	65	27	28	32	32	68	63	16	13	68	24	31
VLNEKCSAYTVELGT	GTCCTTAATGAAAAGTGTAGCGCGTATACAGTTGAACTAGGCACT	0	VLNEKCSAYTVELGT	0	0	0	15	2	25	46	23	30	60	11	12	46	5	15	11	14	8	31	39	17	3	9	0	42	28	9	11	30	25	31	14	2	28	25	16
LNEKCSAYTVELGTE	TTGAATGAAAAATGTAGTGCGTATACCGTTGAACTGGGTACAGAA	0	LNEKCSAYTVELGTE	0	2	1	12	6	27	61	11	32	119	8	13	86	4	1	17	25	13	58	39	36	2	23	0	86	12	12	28	19	62	77	12	10	31	18	10
NEKCSAYTVELGTEV	AACGAAAAGTGTAGCGCATATACCGTGGAATTAGGTACAGAAGTT	0	NEKCSAYTVELGTEV	0	0	0	17	3	25	57	5	29	74	15	21	45	4	11	23	29	27	48	54	58	9	21	1	56	16	24	22	37	66	38	4	22	54	14	39
EKCSAYTVELGTEVN	GAGAAATGTTCTGCATATACAGTTGAATTAGGGACAGAAGTTAAC	0	EKCSAYTVELGTEVN	0	0	0	10	0	5	22	0	14	21	0	5	14	0	2	14	16	15	37	14	29	4	16	1	53	10	9	17	13	49	45	3	3	39	11	15
KCSAYTVELGTEVNE	AAATGCAGCGCGTATACGGTGGAATTAGGAACCGAGGTGAACGAA	0	KCSAYTVELGTEVNE	0	0	0	2	5	6	17	9	9	12	1	7	3	0	0	12	19	20	35	8	34	2	19	0	15	2	7	33	5	53	8	0	1	22	0	6
CSAYTVELGTEVNEF	TGTAGTGCCTACACAGTCGAACTAGGTACTGAAGTCAACGAATTC	0	CSAYTVELGTEVNEF	0	0	0	6	0	3	19	0	5	19	0	1	2	0	0	18	27	17	20	7	7	3	18	0	14	1	4	13	12	39	6	0	3	20	3	9
SAYTVELGTEVNEFA	AGCGCATACACAGTAGAACTAGGCACTGAGGTTAATGAGTTCGCC	0	SAYTVELGTEVNEFA	0	0	0	6	4	1	6	1	1	6	0	0	7	0	1	3	6	3	7	7	9	1	7	0	14	0	4	9	10	12	3	1	0	9	0	2
AYTVELGTEVNEFAC	GCCTATACTGTTGAACTAGGTACAGAAGTCAACGAGTTTGCATGC	0	AYTVELGTEVNEFAC	0	0	0	17	12	24	33	27	70	101	24	56	96	13	49	10	15	18	35	11	27	0	13	0	60	7	28	4	8	41	73	5	24	20	12	26
YTVELGTEVNEFACV	TATACGGTGGAATTAGGAACGGAGGTTAACGAATTCGCATGTGTG	0	YTVELGTEVNEFACV	0	0	2	24	74	39	97	182	100	203	236	143	206	165	193	30	36	36	72	104	132	2	16	1	129	109	209	11	42	66	229	130	317	43	68	89
TVELGTEVNEFACVV	ACTGTTGAATTAGGTACTGAAGTTAATGAATTTGCTTGTGTGGTG	0	TVELGTEVNEFACVV	0	0	0	13	55	46	39	104	156	56	192	184	62	162	282	15	14	16	40	58	88	1	9	0	102	60	148	3	16	33	107	65	205	22	44	48
VELGTEVNEFACVVA	GTTGAATTAGGAACTGAAGTAAATGAATTTGCATGTGTGGTTGCC	0	VELGTEVNEFACVVA	0	0	0	8	19	6	12	35	25	39	40	41	35	42	34	4	7	4	8	27	17	0	12	0	21	58	33	3	8	10	26	73	19	6	21	20
ELGTEVNEFACVVAD	GAGCTAGGTACAGAGGTGAATGAATTTGCTTGCGTTGTTGCAGAT	0	ELGTEVNEFACVVAD	1	0	0	28	81	23	67	170	81	139	357	102	143	400	159	14	24	12	68	116	134	2	10	0	102	109	212	14	19	72	150	216	285	25	44	61
LGTEVNEFACVVADA	TTAGGCACAGAGGTTAATGAATTTGCATGTGTGGTCGCCGATGCT	0	LGTEVNEFACVVADA	0	0	1	9	32	11	27	76	47	41	146	69	39	187	97	10	15	10	41	72	74	1	18	1	55	96	116	8	18	23	56	112	134	23	36	19
GTEVNEFACVVADAV	GGGACTGAGGTGAATGAATTTGCATGTGTTGTTGCAGATGCTGTA	0	GTEVNEFACVVADAV	0	0	0	17	34	29	39	66	80	109	115	86	113	172	137	16	21	20	45	139	131	1	10	0	95	115	174	14	25	64	126	171	247	30	47	47
TEVNEFACVVADAVI	ACTGAAGTTAACGAGTTTGCTTGTGTCGTAGCAGACGCTGTCATC	0	TEVNEFACVVADAVI	0	0	1	18	23	6	81	41	44	151	112	58	155	112	77	11	13	11	47	69	92	1	12	0	73	74	154	9	22	35	81	131	219	32	42	44
EVNEFACVVADAVIK	GAAGTAAATGAATTTGCTTGTGTAGTTGCCGATGCTGTCATTAAA	0	EVNEFACVVADAVIK	1	0	1	18	37	35	77	75	127	165	144	134	131	160	238	19	25	26	63	108	114	0	22	1	114	124	169	19	32	52	136	170	237	41	75	48
VNEFACVVADAVIKT	GTTAACGAATTTGCCTGTGTTGTCGCTGATGCAGTCATCAAAACG	0	VNEFACVVADAVIKT	0	0	0	24	15	30	78	26	110	118	21	128	111	14	137	18	38	23	77	35	24	0	16	0	114	35	32	24	18	21	129	31	28	79	38	25
NEFACVVADAVIKTL	AATGAATTTGCATGTGTTGTTGCAGATGCTGTTATCAAGACTTTA	0	NEFACVVADAVIKTL	0	0	0	6	12	22	26	13	61	24	3	65	12	2	57	22	34	19	40	34	52	2	14	2	66	13	51	15	23	43	41	10	30	70	9	53
EFACVVADAVIKTLQ	GAGTTCGCATGTGTCGTTGCTGATGCTGTTATCAAAACTTTGCAA	0	EFACVVADAVIKTLQ	0	0	0	25	10	37	100	31	133	139	16	135	114	12	176	31	36	30	74	47	121	2	22	0	143	25	185	35	31	80	105	22	242	76	32	97
FACVVADAVIKTLQP	TTTGCATGTGTCGTAGCAGATGCGGTTATTAAGACCTTGCAACCA	0	FACVVADAVIKTLQP	0	0	0	0	0	9	0	0	0	0	0	0	2	0	0	15	12	10	3	3	2	10	14	0	2	0	0	6	0	2	0	0	0	4	2	0
ACVVADAVIKTLQPV	GCTTGCGTTGTGGCAGATGCCGTAATTAAGACACTCCAACCGGTA	0	ACVVADAVIKTLQPV	0	0	0	1	0	3	3	0	12	4	0	10	0	0	3	7	8	9	6	19	11	2	5	0	4	2	7	11	9	16	2	2	2	3	1	8
CVVADAVIKTLQPVS	TGCGTCGTTGCGGATGCCGTTATCAAAACCTTGCAACCCGTTTCT	0	CVVADAVIKTLQPVS	0	0	0	5	7	11	13	15	42	9	1	24	4	3	11	45	50	37	52	85	93	18	31	2	27	25	81	54	75	139	5	18	56	27	13	104
VVADAVIKTLQPVSE	GTCGTGGCCGATGCGGTTATCAAAACTCTGCAACCTGTGTCTGAG	0	VVADAVIKTLQPVSE	0	0	0	3	5	22	8	11	37	11	1	18	2	0	4	18	35	26	25	43	77	7	31	0	8	11	46	39	33	94	2	8	11	20	16	40
VADAVIKTLQPVSEL	GTTGCTGATGCAGTCATAAAAACATTACAACCGGTTTCAGAATTA	0	VADAVIKTLQPVSEL	0	0	0	0	0	0	0	0	0	0	0	0	0	0	0	10	12	8	2	0	2	6	5	0	0	0	0	1	0	6	1	0	0	0	0	0
ADAVIKTLQPVSELL	GCGGATGCAGTAATTAAAACTCTGCAACCAGTTTCAGAACTGTTG	0	ADAVIKTLQPVSELL	0	0	0	0	0	6	2	0	13	0	0	7	0	0	3	19	18	12	9	24	40	11	12	0	6	5	36	12	12	75	1	3	22	3	4	40
DAVIKTLQPVSELLT	GATGCGGTTATTAAGACGCTACAACCGGTAAGCGAGTTGTTGACT	0	DAVIKTLQPVSELLT	0	0	0	1	12	12	1	7	25	3	6	11	0	2	8	14	21	16	8	14	47	11	17	0	2	1	32	11	12	35	0	1	24	1	3	30
AVIKTLQPVSELLTP	GCAGTTATTAAAACCTTGCAGCCGGTGTCGGAACTACTAACTCCC	0	AVIKTLQPVSELLTP	0	0	0	0	0	4	0	0	21	0	0	25	0	0	29	10	10	2	12	15	30	2	9	0	1	5	51	7	16	17	1	7	56	2	3	15
VIKTLQPVSELLTPL	GTAATTAAAACCCTTCAGCCAGTTAGTGAATTGTTAACCCCATTA	0	VIKTLQPVSELLTPL	0	0	0	0	0	17	0	0	63	0	0	48	0	0	34	14	15	12	4	26	43	7	10	2	2	3	34	7	17	40	0	1	20	2	1	40
IKTLQPVSELLTPLG	ATCAAGACATTACAACCAGTTTCGGAATTGTTAACTCCCTTAGGC	0	IKTLQPVSELLTPLG	0	0	0	0	4	39	2	9	150	2	5	157	0	4	268	22	22	14	24	25	128	7	15	0	7	6	177	13	23	60	1	6	182	6	5	70
KTLQPVSELLTPLGI	AAAACTCTCCAACCTGTTTCTGAATTATTAACACCACTCGGTATC	0	KTLQPVSELLTPLGI	0	0	0	0	0	12	2	0	63	1	0	67	0	2	135	6	14	6	13	46	87	4	5	0	7	24	173	10	37	27	2	27	194	3	23	35
TLQPVSELLTPLGID	ACATTGCAACCAGTTAGCGAATTACTCACACCTTTAGGTATTGAT	0	TLQPVSELLTPLGID	0	0	0	15	51	66	36	131	217	18	174	291	5	206	528	35	33	36	66	165	217	15	25	0	23	151	374	52	46	61	15	167	487	54	98	69
LQPVSELLTPLGIDL	CTACAGCCGGTCTCCGAGCTGTTAACTCCATTGGGTATTGATCTA	0	LQPVSELLTPLGIDL	0	0	0	3	12	21	5	40	95	10	66	84	4	75	171	8	10	12	14	57	68	1	5	0	18	63	143	13	12	22	12	81	172	25	29	22
QPVSELLTPLGIDLD	CAGCCTGTTTCCGAATTACTCACGCCATTGGGAATAGATCTTGAT	0	QPVSELLTPLGIDLD	0	0	0	6	20	41	30	41	133	44	48	177	13	48	298	14	16	16	45	54	85	4	8	0	24	47	158	18	27	26	26	64	225	36	47	38
PVSELLTPLGIDLDE	CCAGTGTCCGAACTTCTAACACCCCTAGGTATTGACCTTGATGAA	0	PVSELLTPLGIDLDE	0	0	0	6	2	37	15	0	80	13	0	99	2	2	109	16	19	15	21	4	34	4	23	1	3	7	24	18	0	49	2	3	26	8	3	32
VSELLTPLGIDLDEW	GTCTCGGAGTTGTTGACTCCGTTAGGGATAGATTTGGATGAATGG	0	VSELLTPLGIDLDEW	1	0	0	30	11	44	50	4	141	110	6	154	42	3	271	15	25	18	41	67	164	4	26	1	58	34	296	24	55	91	31	20	398	39	18	83
SELLTPLGIDLDEWS	TCAGAACTTCTAACTCCGTTAGGTATTGACCTAGACGAGTGGTCA	0	SELLTPLGIDLDEWS	0	0	0	8	5	3	34	0	3	58	0	4	45	0	1	14	22	29	44	11	17	4	22	0	72	1	7	14	16	26	68	1	2	33	2	6
ELLTPLGIDLDEWSM	GAACTACTTACCCCACTCGGAATTGATTTGGATGAATGGTCTATG	0	ELLTPLGIDLDEWSM	0	0	0	30	5	15	67	12	49	145	1	30	136	2	6	15	22	20	52	23	29	0	25	0	78	2	22	13	16	53	128	1	16	31	5	44
LLTPLGIDLDEWSMA	TTGTTAACACCATTAGGAATAGATTTAGATGAATGGAGTATGGCT	0	LLTPLGIDLDEWSMA	0	0	0	10	13	7	27	3	20	56	2	12	43	0	6	11	16	12	39	14	10	3	14	0	68	2	9	12	8	20	59	0	2	27	3	10
LTPLGIDLDEWSMAT	TTAACACCATTGGGAATTGACCTTGATGAGTGGTCGATGGCTACG	0	LTPLGIDLDEWSMAT	0	0	1	9	2	26	48	1	85	124	0	105	89	3	74	22	23	13	78	21	55	4	10	0	105	2	57	13	9	46	101	1	52	40	7	58
TPLGIDLDEWSMATY	ACACCTTTGGGCATTGATCTAGACGAGTGGTCAATGGCTACGTAT	0	TPLGIDLDEWSMATY	0	0	0	18	1	32	79	5	78	106	1	80	96	3	44	12	26	20	48	16	87	4	23	0	88	6	74	12	17	100	143	2	55	32	6	73
PLGIDLDEWSMATYY	CCTTTAGGAATCGATCTCGATGAATGGTCCATGGCTACTTACTAC	0	PLGIDLDEWSMATYY	0	0	0	0	1	5	0	0	2	0	0	1	1	1	0	15	21	20	13	0	11	5	18	0	5	0	1	12	1	17	2	0	1	2	0	2
LGIDLDEWSMATYYL	CTCGGGATTGATTTGGATGAGTGGTCAATGGCTACATATTACCTG	0	LGIDLDEWSMATYYL	0	0	0	7	0	2	5	0	6	17	0	2	5	0	1	18	25	25	23	18	9	5	28	0	7	3	1	19	10	19	6	0	0	10	3	1
GIDLDEWSMATYYLF	GGAATCGATCTTGATGAATGGTCCATGGCCACGTACTATCTATTC	0	GIDLDEWSMATYYLF	0	0	0	1	0	0	0	0	0	0	0	0	0	0	1	23	21	23	12	14	12	7	23	2	1	0	3	16	9	44	1	0	0	3	2	7
IDLDEWSMATYYLFD	ATCGATTTGGATGAGTGGAGTATGGCTACCTATTATTTGTTCGAT	0	IDLDEWSMATYYLFD	0	0	0	0	0	1	3	0	2	6	0	0	5	0	0	23	31	19	16	14	6	11	17	0	2	0	0	9	6	11	1	0	0	6	4	2
DLDEWSMATYYLFDE	GATTTAGATGAATGGTCTATGGCTACGTATTACCTATTTGATGAG	0	DLDEWSMATYYLFDE	0	0	0	20	3	0	28	6	1	11	4	0	6	1	0	25	27	17	33	5	18	8	29	2	18	7	3	26	13	25	1	0	1	12	3	3
LDEWSMATYYLFDES	CTGGATGAGTGGAGTATGGCCACATATTACTTATTTGACGAAAGC	0	LDEWSMATYYLFDES	0	0	0	11	0	6	40	0	10	31	1	4	16	0	3	13	17	16	22	6	6	3	10	0	22	2	1	26	10	23	5	0	0	11	0	6
DEWSMATYYLFDESG	GATGAATGGTCTATGGCAACGTACTACTTGTTTGACGAAAGTGGT	0	DEWSMATYYLFDESG	0	0	0	12	1	2	32	0	0	24	0	0	12	0	0	33	39	22	49	23	8	8	27	0	35	3	3	63	23	21	25	0	0	43	3	3
EWSMATYYLFDESGE	GAGTGGAGCATGGCTACTTATTACTTGTTCGATGAATCAGGTGAA	0	EWSMATYYLFDESGE	0	0	0	15	0	4	35	0	6	31	0	1	6	0	0	29	24	24	42	26	13	8	26	1	29	3	2	38	26	28	17	1	0	42	4	7
WSMATYYLFDESGEF	TGGTCTATGGCTACATACTATTTGTTCGATGAGTCTGGTGAATTT	0	WSMATYYLFDESGEF	0	0	0	0	0	0	0	0	0	0	0	0	1	0	0	22	27	21	7	4	0	6	21	1	0	0	0	2	0	0	0	0	0	3	0	0
SMATYYLFDESGEFK	TCCATGGCTACTTATTATTTGTTTGATGAATCAGGTGAGTTCAAA	0	SMATYYLFDESGEFK	0	0	0	1	3	0	14	2	0	8	0	0	1	0	0	13	16	18	32	6	9	3	12	1	16	0	2	19	1	15	5	0	0	10	1	4
MATYYLFDESGEFKL	ATGGCAACATACTACCTGTTCGACGAGTCAGGTGAGTTTAAATTA	0	MATYYLFDESGEFKL	0	0	0	14	1	0	25	0	1	10	0	0	4	0	1	19	43	32	30	2	0	5	25	0	22	0	0	10	0	0	6	0	0	15	0	0
ATYYLFDESGEFKLA	GCTACCTACTACTTATTCGATGAATCCGGTGAATTTAAATTAGCA	0	ATYYLFDESGEFKLA	0	0	0	3	3	0	2	1	0	1	0	0	0	0	0	13	16	14	6	3	0	10	14	0	3	0	0	10	2	0	1	0	0	4	0	1
TYYLFDESGEFKLAS	ACTTACTACTTGTTCGACGAGTCCGGCGAATTCAAATTAGCTTCG	0	TYYLFDESGEFKLAS	0	0	0	12	0	3	3	0	3	1	0	2	0	0	0	28	16	12	9	0	1	4	12	1	4	0	0	3	1	0	3	0	0	3	0	0
YYLFDESGEFKLASH	TATTACTTATTCGACGAATCAGGTGAATTTAAATTGGCTTCACAC	0	YYLFDESGEFKLASH	0	0	0	1	5	1	16	5	0	14	0	0	4	0	0	4	9	4	23	14	8	4	13	0	28	2	0	12	7	3	30	0	0	17	2	0
YLFDESGEFKLASHM	TACTTATTCGATGAATCTGGAGAGTTCAAGTTGGCATCACATATG	0	YLFDESGEFKLASHM	0	0	0	12	0	11	38	0	31	37	1	17	7	0	11	21	33	27	49	35	16	7	25	0	42	5	8	42	17	29	23	2	8	42	6	11
LFDESGEFKLASHMY	CTATTCGATGAATCTGGCGAATTTAAGTTAGCTTCGCATATGTAT	0	LFDESGEFKLASHMY	0	0	0	2	4	4	5	6	2	2	7	0	0	2	0	16	30	24	28	29	36	9	22	1	13	3	7	24	22	58	1	1	3	15	5	18
FDESGEFKLASHMYC	TTTGATGAATCGGGAGAATTTAAACTCGCTTCACATATGTACTGC	0	FDESGEFKLASHMYC	0	0	0	8	1	4	19	10	4	21	9	3	5	6	0	22	19	21	30	39	5	3	8	1	38	8	11	14	15	25	13	7	1	27	16	20
DESGEFKLASHMYCS	GACGAGTCGGGTGAGTTCAAGTTGGCTTCTCACATGTATTGTTCG	0	DESGEFKLASHMYCS	0	0	0	8	8	14	28	12	17	25	10	7	14	5	3	28	26	24	48	105	58	3	21	0	42	44	24	24	72	93	38	26	9	57	56	58
ESGEFKLASHMYCSF	GAGAGTGGTGAATTTAAATTGGCTAGTCACATGTATTGTTCGTTC	0	ESGEFKLASHMYCSF	0	0	0	21	8	35	48	29	55	37	14	28	9	4	4	17	23	21	46	57	32	7	21	0	47	36	31	32	50	73	15	21	8	46	29	50
SGEFKLASHMYCSFY	TCTGGTGAGTTTAAGTTGGCAAGTCATATGTATTGTTCGTTTTAT	0	SGEFKLASHMYCSFY	0	0	0	3	10	7	32	8	12	15	3	4	6	0	4	18	18	28	51	46	18	9	30	0	35	19	8	31	28	31	20	6	1	52	15	14
GEFKLASHMYCSFYP	GGTGAATTTAAATTAGCGTCGCATATGTACTGTTCGTTCTATCCA	0	GEFKLASHMYCSFYP	0	0	0	21	9	7	59	17	16	87	10	9	44	6	6	23	24	17	50	43	14	2	22	2	72	13	14	20	25	31	36	17	2	48	29	20
EFKLASHMYCSFYPP	GAATTCAAGTTGGCCTCCCACATGTATTGCTCGTTCTACCCTCCC	0	EFKLASHMYCSFYPP	0	0	0	15	11	4	60	13	11	73	11	5	39	4	3	14	5	15	26	12	5	4	9	0	40	8	2	24	11	12	22	1	1	44	5	3
FKLASHMYCSFYPPD	TTTAAGTTGGCCTCGCACATGTATTGTTCGTTTTATCCTCCCGAT	0	FKLASHMYCSFYPPD	0	0	0	0	0	0	0	0	0	0	0	0	0	0	0	24	22	20	1	0	1	6	21	1	1	0	0	0	0	3	0	0	0	0	2	0
KLASHMYCSFYPPDE	AAATTGGCCTCACACATGTACTGTTCTTTCTACCCACCCGACGAA	0	KLASHMYCSFYPPDE	0	0	1	0	1	8	0	1	4	0	0	2	1	0	0	7	10	18	9	8	18	4	17	1	4	5	5	17	11	22	1	3	2	6	4	5
LASHMYCSFYPPDED	CTGGCATCTCACATGTACTGTTCGTTTTATCCCCCAGATGAAGAT	0	LASHMYCSFYPPDED	0	0	1	0	0	0	0	0	0	0	0	0	2	0	0	23	24	13	2	4	0	10	27	1	2	0	0	2	1	0	1	1	0	0	2	0
ASHMYCSFYPPDEDE	GCTAGTCACATGTATTGTAGTTTCTATCCACCCGACGAAGATGAG	0	ASHMYCSFYPPDEDE	0	0	0	1	4	5	0	1	5	0	1	4	0	0	1	5	12	9	0	0	0	8	9	0	0	0	0	2	0	0	0	0	0	0	0	0
SHMYCSFYPPDEDEE	TCCCATATGTATTGCTCTTTCTATCCACCTGATGAAGATGAAGAA	0	SHMYCSFYPPDEDEE	0	0	1	4	0	2	1	0	0	0	0	0	0	0	0	12	7	13	1	4	6	8	12	0	0	1	2	3	2	14	0	0	1	1	1	2
HMYCSFYPPDEDEEE	CATATGTATTGTTCCTTTTACCCACCCGATGAAGATGAAGAAGAA	0	HMYCSFYPPDEDEEE	0	0	0	0	0	0	0	0	0	2	0	0	2	0	0	15	26	13	4	1	0	8	26	1	2	0	0	3	2	0	1	0	0	1	0	0
MYCSFYPPDEDEEEG	ATGTACTGTAGTTTTTACCCACCGGATGAGGATGAGGAGGAGGGT	0	MYCSFYPPDEDEEEG	0	0	0	0	0	0	0	0	0	0	0	0	0	0	0	7	2	4	0	2	0	3	1	0	0	0	0	0	0	1	0	1	0	0	0	0
YCSFYPPDEDEEEGD	TACTGCTCCTTTTACCCACCTGACGAAGATGAAGAAGAAGGTGAC	0	YCSFYPPDEDEEEGD	0	0	0	0	1	0	0	2	0	0	2	0	0	4	0	13	17	16	2	3	1	8	12	1	0	0	0	2	0	0	0	0	0	0	1	0
CSFYPPDEDEEEGDC	TGCTCATTTTACCCACCGGATGAAGATGAAGAAGAAGGTGATTGT	0	CSFYPPDEDEEEGDC	0	0	0	2	0	0	3	0	0	3	0	0	1	0	0	7	8	2	0	0	0	1	6	0	0	0	0	0	0	0	0	0	0	0	0	0
SFYPPDEDEEEGDCE	AGTTTTTACCCCCCTGATGAAGACGAAGAAGAAGGCGATTGTGAG	0	SFYPPDEDEEEGDCE	0	0	0	0	3	2	0	3	2	0	1	0	0	1	0	11	29	22	0	4	1	15	22	2	3	3	0	6	0	0	2	0	0	2	0	0
FYPPDEDEEEGDCEE	TTTTACCCCCCTGATGAAGATGAAGAAGAAGGAGATTGCGAAGAA	0	FYPPDEDEEEGDCEE	0	0	1	0	0	0	0	0	3	0	0	0	0	0	0	19	23	21	6	3	1	12	14	1	2	0	0	2	3	0	0	0	0	1	0	0
YPPDEDEEEGDCEEE	TACCCTCCAGATGAAGATGAAGAAGAGGGCGATTGCGAGGAGGAA	0	YPPDEDEEEGDCEEE	0	0	0	0	2	0	0	0	0	0	0	0	0	0	0	11	28	14	0	3	1	5	13	0	1	2	0	2	1	1	0	2	0	0	0	0
PPDEDEEEGDCEEEE	CCACCAGATGAAGATGAAGAAGAAGGAGATTGTGAAGAAGAAGAA	0	PPDEDEEEGDCEEEE	0	0	0	0	0	2	0	0	3	0	0	0	0	0	1	17	19	16	2	1	0	10	16	0	1	1	0	0	2	2	0	0	0	1	0	0
PDEDEEEGDCEEEEF	CCGGATGAAGATGAAGAGGAAGGTGACTGTGAGGAAGAAGAATTT	0	PDEDEEEGDCEEEEF	0	0	0	2	0	0	1	0	4	4	0	1	0	0	1	16	26	14	5	1	0	7	13	0	0	1	0	1	3	0	1	0	0	1	1	0
DEDEEEGDCEEEEFE	GATGAGGATGAAGAGGAAGGGGATTGCGAAGAAGAAGAGTTTGAA	0	DEDEEEGDCEEEEFE	0	0	0	0	0	0	0	0	0	0	0	0	0	0	0	18	33	27	2	3	0	13	22	3	3	1	0	2	3	0	0	1	0	2	0	0
EDEEEGDCEEEEFEP	GAGGACGAAGAAGAGGGTGATTGTGAGGAAGAAGAATTCGAACCT	0	EDEEEGDCEEEEFEP	0	0	0	0	0	3	0	0	0	0	0	0	0	0	0	24	27	33	3	5	0	23	33	3	1	3	0	1	1	0	0	3	0	0	3	0
DEEEGDCEEEEFEPS	GATGAAGAAGAAGGTGACTGTGAAGAAGAGGAATTTGAACCAAGC	0	DEEEGDCEEEEFEPS	0	0	0	0	0	2	0	0	3	0	0	3	0	0	1	11	11	9	0	2	1	7	10	0	0	1	2	1	3	3	0	1	0	0	2	1
EEEGDCEEEEFEPST	GAAGAAGAAGGAGATTGTGAAGAAGAAGAGTTCGAACCTTCCACC	0	EEEGDCEEEEFEPST	0	0	0	0	0	0	0	0	0	0	0	0	0	0	0	0	0	1	0	0	0	0	0	0	1	0	0	2	0	0	1	0	0	0	0	0
EEGDCEEEEFEPSTQ	GAAGAAGGTGATTGTGAGGAAGAGGAATTCGAGCCATCAACGCAA	0	EEGDCEEEEFEPSTQ	0	0	0	0	0	0	0	0	0	0	0	0	0	0	0	21	32	15	4	4	2	14	17	0	0	0	0	2	1	2	0	0	0	1	0	0
EGDCEEEEFEPSTQY	GAAGGAGACTGCGAAGAAGAGGAGTTTGAGCCCTCAACGCAATAT	0	EGDCEEEEFEPSTQY	0	0	0	0	0	0	0	0	0	0	0	0	1	0	0	19	37	25	9	7	2	17	35	0	3	0	2	13	8	1	2	0	1	3	1	2
GDCEEEEFEPSTQYE	GGTGACTGTGAAGAGGAAGAATTCGAACCAAGTACTCAATACGAG	0	GDCEEEEFEPSTQYE	0	0	0	1	0	6	1	0	8	1	0	5	0	0	1	18	28	27	8	12	0	14	18	1	8	0	0	6	11	0	1	0	0	4	1	0
DCEEEEFEPSTQYEY	GATTGTGAAGAGGAAGAATTCGAACCCTCTACTCAGTATGAATAC	0	DCEEEEFEPSTQYEY	0	0	0	3	0	0	2	1	0	1	0	0	0	4	0	13	19	18	16	6	1	10	20	0	1	1	0	11	8	1	0	3	0	5	1	1
CEEEEFEPSTQYEYG	TGTGAAGAAGAGGAATTCGAACCCTCTACACAATACGAATATGGA	0	CEEEEFEPSTQYEYG	0	0	0	3	0	5	10	0	0	7	0	0	4	0	0	26	22	28	11	7	7	15	22	1	2	0	1	14	10	17	1	0	1	7	1	9
EEEEFEPSTQYEYGT	GAAGAAGAAGAGTTCGAGCCGTCAACCCAATACGAATATGGCACT	0	EEEEFEPSTQYEYGT	0	0	0	0	0	0	0	0	0	0	0	0	0	0	0	13	12	14	7	1	0	7	17	0	1	0	0	4	1	0	1	0	0	0	0	0
EEEFEPSTQYEYGTE	GAAGAAGAATTCGAACCATCCACACAATATGAATACGGAACAGAA	0	EEEFEPSTQYEYGTE	0	0	0	0	0	0	0	0	0	0	0	0	0	0	0	12	9	11	4	8	5	6	8	1	3	0	6	4	1	4	0	0	1	2	0	6
EEFEPSTQYEYGTED	GAAGAGTTTGAGCCATCCACACAGTACGAGTACGGCACAGAAGAT	0	EEFEPSTQYEYGTED	0	0	0	0	0	0	0	0	0	0	0	0	0	0	0	15	21	20	5	1	4	6	19	1	0	0	1	5	0	22	0	1	0	1	0	0
EFEPSTQYEYGTEDD	GAATTCGAACCCTCCACTCAGTACGAATATGGCACAGAAGATGAT	0	EFEPSTQYEYGTEDD	0	0	0	4	3	9	14	2	21	15	4	15	1	0	12	25	21	22	44	14	0	11	25	0	23	1	0	44	7	0	6	3	0	31	5	0
FEPSTQYEYGTEDDY	TTTGAACCTTCCACACAGTACGAATACGGTACTGAAGACGATTAT	0	FEPSTQYEYGTEDDY	0	0	0	12	0	1	74	0	1	53	0	0	8	0	0	28	23	18	42	9	7	3	29	1	30	0	0	30	10	15	15	1	1	29	2	1
EPSTQYEYGTEDDYQ	GAACCTTCAACCCAGTACGAATATGGAACTGAAGATGATTACCAA	0	EPSTQYEYGTEDDYQ	0	0	0	22	0	3	60	0	0	39	0	0	8	0	0	23	19	21	28	5	0	4	19	0	8	1	2	35	0	0	4	0	0	21	4	0
PSTQYEYGTEDDYQG	CCATCCACACAATATGAATACGGTACAGAAGATGATTACCAAGGA	0	PSTQYEYGTEDDYQG	0	0	2	6	0	0	17	0	0	11	0	0	0	0	0	10	19	10	31	6	4	7	9	1	11	3	0	21	7	1	2	0	0	9	2	0
STQYEYGTEDDYQGK	TCAACCCAATATGAATATGGTACCGAGGATGATTATCAAGGCAAA	0	STQYEYGTEDDYQGK	0	0	1	25	0	2	68	0	2	46	0	0	22	0	0	14	25	11	42	16	9	7	27	0	56	4	0	28	9	12	36	0	0	42	5	2
TQYEYGTEDDYQGKP	ACACAATATGAATACGGCACAGAAGATGATTACCAGGGAAAACCA	0	TQYEYGTEDDYQGKP	0	0	0	21	0	7	49	0	2	58	0	0	23	0	0	13	26	21	29	10	4	6	14	0	40	2	0	17	9	16	26	0	0	33	1	3
QYEYGTEDDYQGKPL	CAATACGAATACGGGACTGAAGACGACTACCAAGGTAAGCCGCTC	0	QYEYGTEDDYQGKPL	0	0	0	6	0	0	24	1	0	45	0	0	29	0	0	10	15	11	28	11	3	1	5	2	45	1	0	21	5	1	57	0	0	17	1	0
YEYGTEDDYQGKPLE	TACGAATATGGTACAGAAGATGATTATCAAGGAAAGCCATTGGAG	0	YEYGTEDDYQGKPLE	0	0	1	19	2	0	44	2	0	69	2	0	35	0	0	9	14	9	9	1	2	4	6	0	19	0	2	6	1	6	19	0	0	17	1	0
EYGTEDDYQGKPLEF	GAGTACGGAACCGAAGACGACTACCAAGGGAAACCCTTAGAGTTC	0	EYGTEDDYQGKPLEF	0	0	0	2	1	0	4	2	0	5	0	0	1	0	0	6	6	4	15	2	0	2	9	0	15	0	1	9	0	9	11	1	0	6	1	4
YGTEDDYQGKPLEFG	TACGGTACAGAAGATGACTACCAGGGTAAGCCTTTGGAGTTCGGT	0	YGTEDDYQGKPLEFG	0	0	1	2	0	1	19	0	2	3	0	0	0	0	0	11	22	19	60	19	8	5	25	0	14	0	1	26	6	11	6	0	0	12	0	3
GTEDDYQGKPLEFGA	GGCACAGAGGACGATTACCAAGGGAAACCTTTAGAATTTGGTGCA	0	GTEDDYQGKPLEFGA	0	0	0	4	9	3	6	4	8	7	1	6	1	0	6	24	30	26	14	9	5	13	25	0	5	1	0	13	6	13	2	1	0	4	2	0
TEDDYQGKPLEFGAT	ACTGAAGACGATTATCAAGGAAAGCCTTTAGAATTCGGTGCGACA	0	TEDDYQGKPLEFGAT	0	0	1	2	9	0	2	4	0	0	6	0	0	1	0	9	22	15	6	14	4	5	8	1	2	2	3	4	10	7	0	0	0	2	2	1
EDDYQGKPLEFGATS	GAAGATGACTACCAGGGAAAACCTTTAGAATTTGGCGCAACTTCC	0	EDDYQGKPLEFGATS	0	0	0	0	0	3	0	0	5	0	0	3	0	0	0	9	12	12	9	7	2	4	8	0	1	2	6	1	12	7	0	2	0	2	1	8
DDYQGKPLEFGATSA	GATGACTACCAGGGTAAACCCTTAGAGTTCGGTGCAACATCAGCA	0	DDYQGKPLEFGATSA	0	0	0	2	0	0	3	0	0	0	0	0	0	1	0	28	17	20	23	23	35	10	8	0	3	2	16	19	15	74	0	3	3	7	3	26
DYQGKPLEFGATSAA	GACTACCAGGGTAAACCCCTAGAATTTGGCGCAACCAGCGCCGCT	0	DYQGKPLEFGATSAA	0	0	0	1	0	5	9	0	13	4	0	1	0	0	3	8	9	8	16	4	15	0	4	0	21	0	3	11	4	13	6	0	2	25	4	3
YQGKPLEFGATSAAL	TATCAAGGGAAGCCGTTGGAATTTGGAGCTACCTCAGCTGCGTTA	0	YQGKPLEFGATSAAL	0	0	0	2	0	2	6	0	4	8	1	4	1	0	0	14	13	14	29	10	9	1	4	1	28	1	9	15	13	20	22	0	1	30	2	6
QGKPLEFGATSAALQ	CAGGGTAAACCACTTGAATTTGGTGCCACCAGCGCTGCTCTCCAA	0	QGKPLEFGATSAALQ	0	0	0	20	0	1	47	0	8	74	1	2	18	0	0	17	15	11	32	18	15	1	11	0	30	1	9	19	13	24	35	1	2	39	6	13
GKPLEFGATSAALQP	GGTAAACCACTAGAATTTGGTGCAACTTCTGCAGCCCTGCAACCT	0	GKPLEFGATSAALQP	0	0	0	20	10	18	61	2	39	72	3	35	20	0	10	10	13	11	46	22	30	2	23	0	95	1	11	22	17	46	60	2	5	69	3	26
KPLEFGATSAALQPE	AAACCATTGGAATTCGGTGCAACATCTGCAGCTCTACAACCAGAA	0	KPLEFGATSAALQPE	0	0	1	27	0	6	79	0	18	119	0	26	59	0	7	23	27	19	67	47	57	3	21	0	75	3	50	19	28	87	67	0	27	66	16	62
PLEFGATSAALQPEE	CCTTTGGAGTTTGGCGCAACTTCGGCTGCCCTGCAACCAGAAGAA	0	PLEFGATSAALQPEE	0	0	0	6	1	5	15	0	4	24	1	2	10	0	0	20	21	22	55	8	28	2	13	2	38	2	10	28	3	34	35	0	2	37	0	13
LEFGATSAALQPEEE	CTTGAATTTGGTGCTACCTCTGCAGCTTTACAACCCGAAGAAGAA	0	LEFGATSAALQPEEE	0	0	2	30	1	2	99	0	7	125	1	1	60	0	0	26	38	14	55	16	20	2	27	0	101	0	8	19	18	37	89	0	0	58	3	14
EFGATSAALQPEEEQ	GAATTCGGTGCTACTTCTGCTGCCTTGCAGCCGGAGGAAGAACAA	0	EFGATSAALQPEEEQ	0	0	0	4	0	1	4	0	2	16	0	1	8	0	1	11	9	8	26	10	10	1	10	2	47	0	4	7	7	40	48	0	0	31	0	4
FGATSAALQPEEEQE	TTTGGTGCGACATCTGCAGCACTGCAACCGGAGGAAGAACAAGAA	0	FGATSAALQPEEEQE	0	0	0	0	3	6	0	2	1	0	0	0	0	0	1	8	13	10	2	2	0	6	19	1	0	0	0	2	3	0	0	0	0	0	0	0
GATSAALQPEEEQEE	GGTGCCACTTCTGCTGCATTACAACCAGAAGAGGAACAAGAAGAA	0	GATSAALQPEEEQEE	0	0	0	2	0	0	0	0	0	0	0	0	0	0	0	16	15	11	2	0	0	9	7	1	0	0	4	3	1	1	0	0	0	0	0	3
ATSAALQPEEEQEED	GCAACTTCCGCTGCTTTGCAACCTGAGGAAGAGCAAGAAGAAGAC	0	ATSAALQPEEEQEED	0	0	0	0	0	0	0	0	0	0	0	0	0	0	1	11	21	21	4	0	6	5	22	0	0	1	4	1	0	0	0	0	1	0	0	2
TSAALQPEEEQEEDW	ACCAGCGCTGCCTTACAGCCTGAAGAAGAACAAGAAGAAGATTGG	0	TSAALQPEEEQEEDW	0	0	0	0	0	1	3	0	0	1	0	0	0	0	0	5	13	8	1	3	3	5	6	0	0	0	1	1	2	3	0	0	1	0	0	1
SAALQPEEEQEEDWL	AGCGCGGCGTTGCAACCAGAAGAGGAGCAAGAAGAGGATTGGCTT	0	SAALQPEEEQEEDWL	0	0	0	0	0	2	0	0	4	0	0	3	0	0	2	17	43	30	3	1	4	11	10	0	0	0	4	3	0	15	0	0	0	2	0	3
AALQPEEEQEEDWLD	GCTGCGTTGCAACCCGAGGAAGAACAAGAGGAAGATTGGTTGGAC	0	AALQPEEEQEEDWLD	0	0	0	0	0	0	0	0	0	0	0	0	0	0	0	24	23	17	6	7	9	9	26	3	6	0	2	5	2	12	2	0	0	7	0	0
ALQPEEEQEEDWLDD	GCGTTACAACCTGAAGAAGAACAAGAAGAAGACTGGTTAGATGAT	0	ALQPEEEQEEDWLDD	0	0	0	0	3	0	0	1	0	0	0	0	0	0	0	15	16	6	0	0	3	11	19	0	2	0	2	0	4	1	1	0	2	0	0	4
LQPEEEQEEDWLDDD	CTCCAGCCAGAAGAAGAACAAGAGGAAGACTGGCTCGATGACGAT	0	LQPEEEQEEDWLDDD	0	0	0	4	0	0	1	0	0	0	0	0	0	0	0	26	24	29	0	2	0	13	15	0	4	3	0	1	1	0	1	2	0	0	1	0
QPEEEQEEDWLDDDS	CAACCAGAAGAAGAACAAGAAGAGGATTGGTTGGATGACGATTCG	0	QPEEEQEEDWLDDDS	0	0	0	0	0	0	0	0	0	0	0	0	0	0	0	20	13	18	3	3	0	6	29	2	0	0	0	1	2	1	1	0	0	1	0	0
PEEEQEEDWLDDDSQ	CCTGAAGAAGAACAAGAAGAAGACTGGCTCGATGATGACAGTCAA	0	PEEEQEEDWLDDDSQ	0	0	0	0	1	2	0	0	1	1	0	1	0	0	1	19	13	10	3	1	7	13	8	0	1	2	5	0	2	13	0	0	5	3	1	5
EEEQEEDWLDDDSQQ	GAAGAAGAGCAAGAAGAGGATTGGTTGGACGATGATTCACAGCAA	0	EEEQEEDWLDDDSQQ	0	0	0	0	0	3	0	0	12	0	0	4	0	0	0	22	19	16	0	0	0	10	11	0	0	0	0	0	0	0	1	0	0	0	0	0
EEQEEDWLDDDSQQT	GAAGAGCAGGAGGAAGACTGGCTAGATGATGATTCCCAGCAAACT	0	EEQEEDWLDDDSQQT	0	0	0	3	0	0	0	0	3	0	0	4	0	0	4	26	29	19	2	1	9	18	10	0	0	0	1	5	2	8	1	0	1	0	0	4
EQEEDWLDDDSQQTV	GAACAAGAAGAAGATTGGCTTGATGACGACTCGCAACAAACCGTG	0	EQEEDWLDDDSQQTV	0	0	0	4	0	0	3	0	0	2	0	0	0	0	0	14	18	31	17	1	3	9	23	0	5	0	4	20	0	15	4	0	4	7	0	2
QEEDWLDDDSQQTVG	CAAGAAGAAGATTGGTTGGACGATGATAGTCAGCAAACGGTCGGT	0	QEEDWLDDDSQQTVG	2	0	1	11	0	0	10	0	0	11	0	0	1	0	0	12	18	11	10	4	5	6	15	0	7	1	0	7	0	0	6	0	1	8	2	2
EEDWLDDDSQQTVGQ	GAAGAAGACTGGCTTGACGATGATTCTCAACAGACAGTGGGTCAA	0	EEDWLDDDSQQTVGQ	0	0	0	17	0	0	36	0	4	35	0	6	12	0	2	22	13	20	24	3	0	5	14	0	14	0	1	29	6	3	11	0	0	22	4	3
EDWLDDDSQQTVGQQ	GAAGACTGGCTAGATGATGATAGTCAGCAAACTGTTGGTCAACAA	0	EDWLDDDSQQTVGQQ	1	1	2	9	0	2	17	0	0	26	1	0	17	0	2	21	11	12	26	2	5	5	8	1	58	1	3	25	12	14	59	0	4	37	1	8
DWLDDDSQQTVGQQD	GATTGGCTTGACGACGATTCACAACAAACAGTGGGACAACAGGAT	0	DWLDDDSQQTVGQQD	0	0	0	8	0	0	25	0	0	30	0	0	33	1	0	11	8	5	25	2	3	1	10	0	26	0	0	5	0	6	52	0	0	16	1	1
WLDDDSQQTVGQQDG	TGGTTGGACGACGATAGCCAACAAACCGTTGGACAACAAGACGGT	0	WLDDDSQQTVGQQDG	0	0	1	13	0	3	51	0	4	79	1	1	46	0	1	17	30	18	40	5	8	1	13	0	47	1	0	18	2	23	38	0	0	51	5	3
LDDDSQQTVGQQDGS	TTAGATGATGACTCACAGCAAACAGTCGGCCAACAGGACGGTTCT	0	LDDDSQQTVGQQDGS	0	0	0	0	0	1	0	0	0	0	0	0	0	0	0	10	7	14	7	9	21	5	13	0	2	0	2	3	9	33	1	1	0	1	0	4
DDDSQQTVGQQDGSE	GATGATGATTCCCAGCAAACAGTTGGTCAACAAGATGGTTCGGAA	0	DDDSQQTVGQQDGSE	0	0	0	0	0	0	0	0	0	0	0	0	0	0	0	13	27	25	4	8	18	20	20	2	0	1	5	5	2	48	0	0	0	0	0	1
DDSQQTVGQQDGSED	GATGACAGTCAACAGACAGTAGGCCAACAAGACGGTTCTGAAGAT	0	DDSQQTVGQQDGSED	0	0	0	0	0	0	0	0	0	0	0	0	1	0	0	34	36	35	6	8	9	12	23	1	2	2	3	7	6	21	0	0	2	0	1	5
DSQQTVGQQDGSEDN	GACTCGCAGCAGACTGTTGGTCAACAAGATGGGAGTGAAGACAAT	0	DSQQTVGQQDGSEDN	0	1	0	0	1	5	0	0	11	0	0	6	1	0	3	26	39	29	7	4	2	17	17	1	0	0	1	8	1	1	0	0	0	2	0	2
SQQTVGQQDGSEDNQ	TCACAGCAAACTGTAGGGCAACAGGATGGGTCTGAGGACAACCAG	0	SQQTVGQQDGSEDNQ	0	0	0	0	0	0	0	0	0	0	0	0	0	0	0	11	20	13	6	7	0	8	4	0	1	0	0	4	2	0	0	0	0	0	2	0
QQTVGQQDGSEDNQT	CAGCAAACCGTCGGACAACAGGATGGATCAGAAGATAATCAAACC	0	QQTVGQQDGSEDNQT	0	0	0	0	0	0	0	0	0	0	0	0	0	0	0	15	15	8	2	0	11	6	12	0	0	0	4	1	0	10	0	0	2	0	0	3
QTVGQQDGSEDNQTT	CAGACCGTCGGTCAGCAGGACGGTTCGGAGGATAATCAGACCACA	0	QTVGQQDGSEDNQTT	0	0	0	0	0	0	0	0	0	0	0	0	0	0	0	12	11	15	8	5	0	10	14	2	0	0	0	7	8	0	0	0	0	1	1	0
TVGQQDGSEDNQTTT	ACAGTTGGCCAACAAGATGGCTCAGAAGACAACCAAACAACGACT	0	TVGQQDGSEDNQTTT	0	0	0	5	6	1	2	4	2	3	2	0	0	2	0	27	21	21	19	6	15	14	23	1	2	2	11	10	3	36	1	0	5	1	1	4
VGQQDGSEDNQTTTI	GTCGGGCAACAAGATGGATCAGAGGATAATCAAACCACCACAATA	0	VGQQDGSEDNQTTTI	0	0	0	0	0	0	0	0	0	0	0	0	0	0	0	12	16	12	4	6	0	6	13	0	0	0	0	1	5	0	0	0	0	0	2	0
GQQDGSEDNQTTTIQ	GGTCAACAGGACGGTTCGGAAGATAATCAGACGACAACGATTCAA	0	GQQDGSEDNQTTTIQ	0	0	0	0	0	7	0	0	6	0	0	3	0	0	1	29	26	19	12	11	8	12	15	0	5	0	0	18	11	23	2	1	0	7	1	1
QQDGSEDNQTTTIQT	CAACAAGACGGCTCAGAAGATAATCAAACAACTACAATACAAACA	0	QQDGSEDNQTTTIQT	0	0	0	0	0	0	0	0	1	0	0	1	0	0	0	14	12	8	7	3	9	3	12	0	1	0	2	7	2	22	0	0	0	1	1	0
QDGSEDNQTTTIQTI	CAAGATGGGTCAGAAGATAATCAGACCACTACTATACAAACCATT	0	QDGSEDNQTTTIQTI	0	0	0	0	0	12	1	0	21	0	0	14	0	0	1	19	20	18	5	7	10	15	8	1	2	0	9	7	10	26	0	0	1	4	2	6
DGSEDNQTTTIQTIV	GATGGATCTGAAGACAACCAAACTACGACCATTCAAACTATTGTC	0	DGSEDNQTTTIQTIV	1	0	1	0	0	16	1	0	47	0	0	18	1	0	6	16	12	12	0	9	44	5	9	0	2	0	28	9	13	57	1	0	10	0	1	39
GSEDNQTTTIQTIVE	GGTTCAGAAGATAACCAAACGACAACTATTCAAACGATAGTCGAG	0	GSEDNQTTTIQTIVE	0	0	0	0	0	18	0	0	11	0	0	5	0	0	3	17	21	19	13	6	23	14	17	0	2	0	10	9	4	46	0	0	5	1	0	20
SEDNQTTTIQTIVEV	AGTGAAGATAACCAGACTACAACCATCCAAACAATTGTGGAAGTT	0	SEDNQTTTIQTIVEV	0	0	0	0	2	36	0	2	75	0	1	66	0	0	45	28	28	17	13	23	59	5	25	1	1	11	74	11	17	90	0	7	67	0	6	76
EDNQTTTIQTIVEVQ	GAAGATAATCAAACGACCACCATTCAAACTATCGTAGAGGTCCAA	0	EDNQTTTIQTIVEVQ	0	0	0	0	12	14	0	12	44	0	5	52	0	0	44	13	24	15	11	10	43	8	10	0	2	5	57	5	19	40	1	0	54	1	1	63
DNQTTTIQTIVEVQP	GATAACCAAACAACGACAATACAGACTATAGTCGAGGTTCAACCC	0	DNQTTTIQTIVEVQP	0	0	0	0	5	10	1	13	21	0	9	27	0	2	38	11	8	8	9	22	53	5	7	3	2	14	69	12	13	37	3	26	87	2	8	46
NQTTTIQTIVEVQPQ	AATCAAACTACTACTATCCAGACTATCGTGGAAGTTCAACCACAG	0	NQTTTIQTIVEVQPQ	0	0	0	4	34	14	20	78	42	27	71	52	15	82	72	12	19	16	23	38	51	2	13	0	38	24	86	21	20	29	23	47	113	28	32	48
QTTTIQTIVEVQPQL	CAAACGACCACGATACAAACTATTGTCGAGGTTCAACCCCAACTA	0	QTTTIQTIVEVQPQL	0	0	0	20	28	37	42	108	68	83	146	113	45	254	209	22	19	21	54	93	90	3	16	2	50	93	132	30	27	36	64	192	172	46	69	36
TTTIQTIVEVQPQLE	ACAACCACCATTCAGACGATTGTTGAAGTACAGCCACAGTTAGAG	0	TTTIQTIVEVQPQLE	0	0	0	0	2	1	2	5	24	0	2	13	1	1	2	11	23	13	9	33	35	9	19	1	0	12	30	20	12	58	2	11	20	8	14	41
TTIQTIVEVQPQLEM	ACAACTATACAGACAATCGTAGAAGTTCAACCACAGCTAGAAATG	0	TTIQTIVEVQPQLEM	0	0	0	4	34	25	7	75	94	5	98	98	5	50	117	22	36	20	27	61	76	9	16	1	11	38	83	18	14	59	2	45	90	10	37	62
TIQTIVEVQPQLEME	ACAATTCAAACGATTGTCGAGGTACAACCGCAACTTGAGATGGAG	0	TIQTIVEVQPQLEME	0	0	0	0	9	29	0	20	60	0	16	75	0	6	81	13	13	24	16	28	63	4	20	0	14	10	73	14	13	31	5	16	72	9	11	37
IQTIVEVQPQLEMEL	ATTCAGACAATTGTTGAAGTGCAACCTCAACTAGAAATGGAACTA	0	IQTIVEVQPQLEMEL	0	0	1	38	9	42	65	23	136	54	29	141	8	24	176	21	19	25	42	70	84	9	22	0	18	36	117	28	29	58	14	36	148	24	51	58
QTIVEVQPQLEMELT	CAGACTATTGTTGAAGTACAGCCACAACTTGAAATGGAACTCACT	0	QTIVEVQPQLEMELT	0	0	0	22	16	39	46	23	112	61	36	127	26	31	216	16	23	14	30	36	65	2	17	1	43	20	98	10	19	47	32	12	114	28	25	39
TIVEVQPQLEMELTP	ACTATAGTAGAAGTACAGCCACAACTGGAAATGGAACTTACACCT	0	TIVEVQPQLEMELTP	0	0	0	8	18	10	33	35	42	62	38	37	61	10	74	13	16	13	26	36	32	0	14	3	69	23	56	7	15	16	79	20	71	25	25	18
IVEVQPQLEMELTPV	ATTGTGGAAGTTCAACCGCAATTGGAGATGGAATTGACTCCGGTA	0	IVEVQPQLEMELTPV	0	0	1	18	7	31	66	6	84	151	3	125	121	7	168	9	6	13	44	46	40	1	5	0	118	6	71	9	31	12	117	4	107	26	26	30
VEVQPQLEMELTPVV	GTCGAAGTTCAACCCCAATTGGAAATGGAGTTGACACCTGTCGTG	0	VEVQPQLEMELTPVV	0	0	1	14	42	16	30	127	43	81	175	64	89	90	74	18	16	20	42	69	77	1	9	0	84	36	150	6	29	35	106	31	166	31	49	57
EVQPQLEMELTPVVQ	GAAGTTCAACCACAGCTGGAAATGGAACTGACTCCCGTGGTTCAA	0	EVQPQLEMELTPVVQ	0	0	1	10	16	48	41	26	142	101	32	164	131	14	307	16	31	19	62	73	144	1	11	0	103	32	198	7	28	55	172	39	293	20	29	46
VQPQLEMELTPVVQT	GTTCAACCACAGTTGGAAATGGAGCTAACTCCTGTTGTACAAACA	0	VQPQLEMELTPVVQT	0	0	0	5	1	25	19	0	62	67	0	85	53	1	160	7	13	12	38	4	58	0	7	0	55	1	82	1	11	13	64	0	111	16	0	15
QPQLEMELTPVVQTI	CAACCTCAACTTGAGATGGAACTAACACCAGTGGTCCAGACTATT	0	QPQLEMELTPVVQTI	1	0	0	31	0	15	85	0	29	170	0	30	212	2	57	11	14	8	28	35	46	0	11	0	69	18	88	7	16	24	80	20	117	20	14	19
PQLEMELTPVVQTIE	CCACAATTGGAAATGGAGCTAACTCCCGTTGTACAAACTATTGAA	0	PQLEMELTPVVQTIE	0	0	1	24	15	13	80	15	48	146	5	60	133	4	79	16	24	13	45	40	71	0	13	1	61	8	98	9	29	23	71	12	96	23	11	30
QLEMELTPVVQTIEV	CAGTTAGAAATGGAACTAACCCCCGTAGTTCAAACAATCGAGGTG	0	QLEMELTPVVQTIEV	0	0	0	20	10	36	57	19	104	94	25	196	115	16	234	13	14	13	49	41	106	3	11	0	87	22	170	11	25	37	123	16	266	22	26	44
LEMELTPVVQTIEVN	TTAGAAATGGAACTTACACCCGTAGTCCAGACCATTGAAGTAAAC	0	LEMELTPVVQTIEVN	0	0	0	11	22	13	23	49	52	37	52	72	9	37	102	12	12	5	26	40	41	3	10	2	70	25	61	12	19	18	30	32	58	52	36	39
EMELTPVVQTIEVNS	GAAATGGAATTGACCCCTGTCGTACAAACTATTGAAGTTAACAGT	0	EMELTPVVQTIEVNS	0	0	0	1	4	28	5	15	72	6	6	111	3	2	156	18	24	22	34	38	87	2	14	0	52	28	145	21	29	45	14	16	186	64	32	67
MELTPVVQTIEVNSF	ATGGAGTTAACTCCTGTAGTTCAAACTATTGAAGTGAACAGCTTT	0	MELTPVVQTIEVNSF	0	0	0	0	1	6	0	0	18	0	0	8	0	0	3	16	30	14	22	17	55	9	15	2	5	3	40	20	11	98	0	1	21	9	2	75
ELTPVVQTIEVNSFS	GAACTTACCCCAGTCGTCCAGACAATTGAAGTTAACAGCTTTAGT	0	ELTPVVQTIEVNSFS	0	0	0	0	2	17	0	2	20	0	1	18	1	1	3	21	29	28	15	25	32	11	32	0	4	3	13	21	6	52	3	1	4	9	5	24
LTPVVQTIEVNSFSG	CTTACTCCTGTCGTACAAACAATTGAGGTGAATTCATTTTCGGGC	0	LTPVVQTIEVNSFSG	0	0	0	6	1	11	6	0	12	2	0	10	0	0	0	17	19	16	11	21	13	12	16	1	1	3	7	12	15	21	1	0	1	3	4	9
TPVVQTIEVNSFSGY	ACGCCTGTCGTTCAAACCATTGAGGTTAATAGCTTCTCCGGTTAT	0	TPVVQTIEVNSFSGY	0	0	0	1	4	14	3	12	13	3	15	14	1	6	3	13	13	14	21	31	18	9	14	0	4	8	18	19	21	33	1	4	4	8	18	21
PVVQTIEVNSFSGYL	CCAGTAGTACAAACTATCGAAGTAAATTCATTTTCAGGATATCTA	0	PVVQTIEVNSFSGYL	0	0	0	4	5	8	8	2	7	3	0	3	3	0	0	16	15	17	12	14	7	10	20	0	3	3	5	21	14	19	1	7	0	3	20	3
VVQTIEVNSFSGYLK	GTCGTGCAAACAATCGAAGTTAATTCTTTCTCTGGCTATCTCAAG	0	VVQTIEVNSFSGYLK	0	0	0	0	0	0	0	0	1	0	0	0	0	0	0	21	26	12	19	21	16	8	24	1	8	3	4	29	10	18	3	1	1	5	4	7
VQTIEVNSFSGYLKL	GTACAGACAATTGAGGTCAACAGCTTTTCGGGCTACCTGAAATTA	0	VQTIEVNSFSGYLKL	0	0	0	1	0	0	4	0	0	1	0	0	0	0	0	4	8	12	16	3	4	5	13	0	2	0	0	9	7	12	0	0	0	8	1	0
QTIEVNSFSGYLKLT	CAAACGATAGAAGTCAACTCGTTTTCCGGTTATCTGAAGCTCACA	0	QTIEVNSFSGYLKLT	0	0	0	6	1	1	1	0	0	2	0	1	0	0	0	19	18	13	16	9	8	20	12	0	3	0	0	16	6	27	0	0	1	1	5	6
TIEVNSFSGYLKLTD	ACCATCGAGGTAAACAGCTTCTCAGGATACCTCAAATTGACCGAT	0	TIEVNSFSGYLKLTD	1	0	0	0	0	3	0	0	0	0	0	0	0	0	0	13	19	14	10	28	10	6	14	0	1	2	7	11	13	24	0	0	2	1	3	7
IEVNSFSGYLKLTDN	ATTGAAGTTAATTCGTTCAGCGGATATCTGAAATTGACAGACAAT	0	IEVNSFSGYLKLTDN	0	0	0	20	6	12	85	12	27	96	2	20	54	0	10	9	16	6	27	19	22	2	13	1	67	2	22	9	16	34	58	2	16	30	6	30
EVNSFSGYLKLTDNV	GAAGTGAACAGTTTTTCAGGTTATTTAAAATTGACTGACAATGTT	0	EVNSFSGYLKLTDNV	1	1	1	29	50	29	91	98	102	173	107	124	135	39	151	28	19	20	63	60	97	0	17	2	100	51	119	15	33	40	98	43	168	31	49	55
VNSFSGYLKLTDNVY	GTTAACTCATTCAGTGGCTATTTGAAACTTACTGATAACGTGTAC	0	VNSFSGYLKLTDNVY	0	0	0	22	7	19	64	20	75	76	7	53	43	11	53	23	24	28	54	51	62	1	19	1	65	22	75	13	33	39	77	14	88	32	17	40
NSFSGYLKLTDNVYI	AATTCATTCTCCGGTTACTTAAAGCTAACCGACAACGTTTATATC	0	NSFSGYLKLTDNVYI	0	0	0	0	1	14	13	15	27	16	11	32	5	11	7	8	11	13	27	24	23	4	10	1	63	3	26	18	11	44	27	1	9	43	6	36
SFSGYLKLTDNVYIK	TCTTTCAGCGGATACTTAAAATTGACTGATAACGTTTATATTAAA	0	SFSGYLKLTDNVYIK	0	0	0	8	0	1	12	0	3	6	0	3	3	0	0	10	13	5	18	5	16	2	2	0	15	0	9	7	0	24	7	0	1	21	1	7
FSGYLKLTDNVYIKN	TTCAGTGGTTACCTTAAACTTACTGATAACGTATATATTAAGAAC	0	FSGYLKLTDNVYIKN	0	0	0	3	0	4	6	0	2	1	0	2	0	0	0	21	16	11	6	0	1	0	7	0	2	0	0	4	2	1	1	0	0	3	0	0
SGYLKLTDNVYIKNA	TCTGGGTACTTGAAATTGACCGATAATGTGTATATCAAAAATGCA	0	SGYLKLTDNVYIKNA	0	0	2	15	21	13	53	35	32	74	22	32	44	21	37	26	17	8	38	31	44	2	6	0	51	5	62	14	17	42	41	6	54	38	11	54
GYLKLTDNVYIKNAD	GGATACCTAAAACTGACTGATAATGTCTACATAAAAAATGCGGAT	0	GYLKLTDNVYIKNAD	0	0	1	19	6	14	54	14	38	87	12	13	51	3	21	7	8	10	32	16	33	2	6	0	48	4	48	14	12	36	59	5	56	32	11	38
YLKLTDNVYIKNADI	TATTTAAAGTTGACCGACAATGTTTATATAAAAAACGCTGATATA	0	YLKLTDNVYIKNADI	0	0	0	11	0	6	7	0	16	6	1	11	2	2	7	9	13	7	25	24	18	3	17	0	32	5	4	11	11	10	13	1	4	18	2	5
LKLTDNVYIKNADIV	CTTAAGTTAACAGATAATGTATATATTAAGAATGCGGATATCGTC	0	LKLTDNVYIKNADIV	0	0	1	8	5	18	17	13	32	37	10	44	30	1	26	9	8	7	16	13	34	0	7	1	25	2	27	6	6	21	36	0	33	18	15	24
KLTDNVYIKNADIVE	AAATTAACTGACAACGTTTATATAAAAAATGCAGATATCGTCGAA	0	KLTDNVYIKNADIVE	0	0	0	13	2	7	30	1	4	53	0	3	15	0	0	18	15	10	46	16	10	3	23	0	51	4	13	17	11	17	32	1	5	33	4	13
LTDNVYIKNADIVEE	TTGACGGATAATGTTTATATCAAAAACGCCGACATTGTAGAAGAA	0	LTDNVYIKNADIVEE	0	0	0	7	0	0	16	0	0	15	0	0	1	0	0	16	19	14	23	8	7	7	12	1	12	3	5	22	6	14	1	1	2	5	1	8
TDNVYIKNADIVEEA	ACTGACAATGTCTATATAAAAAATGCTGACATAGTTGAAGAAGCA	0	TDNVYIKNADIVEEA	0	0	0	7	0	5	23	0	7	16	0	4	1	0	4	14	13	11	14	9	15	5	10	1	9	3	10	13	5	36	1	1	2	10	6	13
DNVYIKNADIVEEAK	GACAATGTCTATATTAAAAACGCAGACATAGTTGAAGAAGCTAAA	0	DNVYIKNADIVEEAK	0	0	1	6	12	3	13	24	4	12	14	8	2	1	2	12	22	13	16	12	23	4	12	0	23	4	16	20	9	23	6	2	4	17	9	9
NVYIKNADIVEEAKK	AATGTTTACATCAAGAATGCAGATATTGTTGAAGAGGCTAAAAAG	0	NVYIKNADIVEEAKK	0	0	0	7	13	21	15	29	28	7	15	20	0	3	11	17	19	10	23	20	12	5	14	2	6	16	17	22	14	23	0	9	4	14	12	27
VYIKNADIVEEAKKV	GTATACATCAAGAATGCAGACATTGTCGAAGAAGCAAAGAAAGTT	0	VYIKNADIVEEAKKV	0	1	0	7	5	11	5	14	27	3	12	10	0	7	2	27	30	23	33	34	7	12	32	1	9	8	8	30	16	26	4	1	3	11	4	12
YIKNADIVEEAKKVK	TATATCAAAAACGCAGATATTGTCGAAGAGGCAAAAAAAGTAAAA	0	YIKNADIVEEAKKVK	0	0	0	0	2	4	0	1	0	0	0	0	0	0	0	10	8	5	1	4	1	11	12	0	1	0	0	3	3	4	0	0	0	1	0	0
IKNADIVEEAKKVKP	ATAAAAAATGCCGATATAGTTGAAGAGGCCAAAAAGGTCAAACCT	0	IKNADIVEEAKKVKP	0	0	0	0	0	3	0	0	0	0	0	2	0	0	0	23	25	7	4	3	0	12	17	1	0	6	0	2	2	0	1	2	0	0	3	0
KNADIVEEAKKVKPT	AAGAACGCTGATATTGTCGAGGAAGCTAAAAAAGTTAAACCAACC	0	KNADIVEEAKKVKPT	0	0	0	0	0	0	0	0	0	0	0	0	0	0	0	5	4	2	1	2	0	2	4	0	0	0	0	2	0	0	0	0	0	1	0	0
NADIVEEAKKVKPTV	AACGCTGATATTGTTGAAGAGGCAAAGAAAGTAAAACCCACGGTT	0	NADIVEEAKKVKPTV	0	0	0	1	0	4	3	0	4	2	0	7	1	0	3	16	15	12	4	3	3	7	5	0	3	0	0	3	1	2	0	0	0	0	0	1
ADIVEEAKKVKPTVV	GCCGATATAGTGGAAGAGGCGAAGAAGGTCAAACCCACTGTAGTT	0	ADIVEEAKKVKPTVV	0	0	0	0	0	3	0	0	7	0	0	4	0	0	6	18	24	18	0	0	5	6	13	0	1	0	1	3	0	26	0	0	1	0	0	4
DIVEEAKKVKPTVVV	GATATCGTTGAAGAGGCTAAAAAAGTCAAACCAACTGTCGTTGTT	0	DIVEEAKKVKPTVVV	0	0	0	0	0	6	0	0	2	0	0	2	0	0	0	25	31	18	4	2	3	15	17	3	2	0	0	3	3	3	3	0	1	1	0	1
IVEEAKKVKPTVVVN	ATTGTTGAAGAAGCAAAGAAGGTGAAACCAACTGTAGTGGTCAAC	0	IVEEAKKVKPTVVVN	0	0	0	0	0	0	0	0	0	0	0	1	0	1	0	6	16	11	1	1	2	3	7	1	0	0	0	0	0	9	0	0	0	0	0	1
VEEAKKVKPTVVVNA	GTCGAGGAAGCCAAGAAAGTTAAGCCTACCGTTGTAGTTAATGCG	0	VEEAKKVKPTVVVNA	0	0	0	2	0	0	1	0	0	0	0	0	0	0	0	31	28	22	2	1	3	11	23	1	0	1	0	1	2	2	1	0	0	0	1	0
EEAKKVKPTVVVNAA	GAGGAAGCTAAAAAAGTGAAGCCTACGGTGGTAGTCAACGCGGCC	0	EEAKKVKPTVVVNAA	0	0	0	0	0	8	0	0	11	0	0	12	1	0	4	3	7	6	2	3	0	3	7	0	1	3	0	1	2	0	0	1	0	4	0	0
EAKKVKPTVVVNAAN	GAGGCCAAGAAAGTGAAACCCACTGTTGTAGTTAATGCAGCCAAT	0	EAKKVKPTVVVNAAN	0	0	0	4	18	42	2	19	78	4	14	58	0	4	43	13	13	13	30	11	19	8	9	0	8	9	13	13	11	31	5	10	4	14	9	10
AKKVKPTVVVNAANV	GCTAAAAAAGTTAAACCAACGGTAGTGGTAAACGCAGCTAATGTT	0	AKKVKPTVVVNAANV	0	0	1	9	11	13	11	21	43	11	22	48	3	9	38	21	30	18	37	23	34	15	19	1	17	18	46	26	17	52	9	4	19	32	21	61
KKVKPTVVVNAANVY	AAAAAGGTGAAACCAACAGTGGTCGTTAACGCTGCAAATGTCTAC	0	KKVKPTVVVNAANVY	0	0	1	25	45	39	55	117	118	84	231	145	55	343	234	33	20	18	57	169	112	5	25	0	47	195	165	24	35	60	47	273	228	49	94	63
KVKPTVVVNAANVYL	AAGGTCAAACCAACTGTGGTAGTTAATGCAGCCAACGTTTACCTG	0	KVKPTVVVNAANVYL	0	0	0	3	67	30	4	155	95	3	251	118	3	234	136	23	28	15	27	102	72	4	7	1	15	84	106	23	32	66	6	89	124	27	51	66
VKPTVVVNAANVYLK	GTTAAACCGACAGTTGTTGTTAATGCTGCAAATGTCTACTTAAAG	0	VKPTVVVNAANVYLK	0	0	0	8	23	30	24	73	88	19	90	103	4	93	94	15	33	22	31	102	117	6	29	1	39	77	121	33	39	54	23	73	158	50	53	67
KPTVVVNAANVYLKH	AAACCAACGGTAGTGGTAAACGCAGCGAACGTGTACTTGAAACAC	0	KPTVVVNAANVYLKH	1	0	1	1	18	37	2	58	86	2	88	125	3	135	225	18	25	24	38	90	94	4	11	0	35	67	144	16	27	72	23	122	174	53	64	66
PTVVVNAANVYLKHG	CCAACAGTCGTTGTGAACGCTGCTAATGTCTACTTAAAACATGGT	0	PTVVVNAANVYLKHG	0	0	0	5	2	13	15	3	57	9	5	64	0	1	52	18	26	25	22	39	43	5	23	2	8	16	41	22	22	56	5	10	26	14	11	31
TVVVNAANVYLKHGG	ACGGTAGTAGTGAACGCAGCCAATGTCTATCTTAAACATGGGGGC	0	TVVVNAANVYLKHGG	0	0	0	0	4	18	0	4	23	0	6	15	0	0	5	5	20	18	12	6	17	9	4	0	2	2	4	10	5	17	0	1	3	2	5	11
VVVNAANVYLKHGGG	GTAGTTGTGAACGCTGCTAATGTCTATCTGAAACACGGAGGTGGT	0	VVVNAANVYLKHGGG	0	0	2	0	1	5	0	0	6	0	0	9	0	0	5	20	35	26	7	9	0	10	23	0	3	0	4	6	3	7	1	1	1	4	2	1
VVNAANVYLKHGGGV	GTTGTTAACGCTGCTAATGTATATTTGAAGCACGGTGGCGGAGTT	0	VVNAANVYLKHGGGV	1	0	0	0	0	0	0	0	0	0	0	1	0	0	0	11	11	13	3	4	0	6	14	0	1	0	0	2	3	0	1	0	0	1	0	0
VNAANVYLKHGGGVA	GTTAATGCAGCGAATGTTTACTTGAAACATGGCGGAGGCGTCGCA	0	VNAANVYLKHGGGVA	0	0	0	0	0	5	1	0	2	2	0	4	0	0	0	9	9	12	13	3	0	2	4	0	7	0	0	14	1	6	1	1	0	11	0	0
NAANVYLKHGGGVAG	AACGCTGCGAACGTCTACTTAAAACATGGCGGTGGTGTAGCCGGT	0	NAANVYLKHGGGVAG	0	0	0	3	0	0	4	0	1	9	0	0	1	0	0	2	7	3	15	5	1	0	3	0	10	0	0	3	2	0	1	0	0	5	0	0
AANVYLKHGGGVAGA	GCCGCTAATGTTTATCTGAAGCATGGCGGAGGAGTTGCAGGAGCT	0	AANVYLKHGGGVAGA	0	0	0	2	2	2	0	3	3	1	0	0	0	0	0	7	10	11	10	8	3	2	6	0	1	4	3	11	7	4	1	1	0	9	4	2
ANVYLKHGGGVAGAL	GCTAATGTTTACCTCAAACATGGGGGTGGTGTTGCTGGGGCTCTA	0	ANVYLKHGGGVAGAL	0	0	0	7	0	1	9	0	0	5	1	0	3	0	0	13	23	22	27	4	16	12	19	1	4	0	6	27	12	25	1	0	5	8	3	3
NVYLKHGGGVAGALN	AATGTGTATTTGAAACATGGTGGTGGTGTTGCAGGAGCACTAAAT	0	NVYLKHGGGVAGALN	0	0	0	0	0	5	3	0	10	0	0	3	0	0	1	25	12	18	25	20	17	11	25	1	10	4	4	30	12	18	1	3	3	8	3	7
VYLKHGGGVAGALNK	GTCTACCTTAAACACGGAGGAGGTGTCGCTGGTGCACTGAACAAG	0	VYLKHGGGVAGALNK	0	0	0	0	11	0	0	3	0	0	1	1	0	0	0	19	19	16	4	18	5	4	11	1	2	1	2	7	14	15	2	1	1	0	1	5
YLKHGGGVAGALNKA	TACCTAAAACACGGCGGTGGGGTGGCGGGTGCTCTTAACAAGGCT	0	YLKHGGGVAGALNKA	0	0	0	0	0	3	0	0	1	0	0	0	0	0	0	14	29	15	10	17	12	10	14	1	3	1	4	16	21	35	1	0	2	4	5	9
LKHGGGVAGALNKAT	TTAAAACATGGTGGAGGAGTGGCAGGCGCTCTGAACAAGGCAACT	0	LKHGGGVAGALNKAT	0	0	0	2	5	4	1	1	5	0	1	3	0	0	0	19	20	18	5	26	2	9	15	1	1	0	1	4	17	8	0	0	0	3	2	0
KHGGGVAGALNKATN	AAGCATGGAGGGGGTGTGGCTGGGGCTCTCAATAAAGCTACAAAT	0	KHGGGVAGALNKATN	0	0	0	10	34	13	29	64	27	33	48	24	8	24	10	33	28	24	59	61	66	8	13	0	53	45	71	33	51	90	16	20	45	43	47	72
HGGGVAGALNKATNN	CATGGTGGTGGTGTAGCTGGTGCATTGAATAAGGCCACAAACAAC	0	HGGGVAGALNKATNN	1	0	0	7	27	10	41	42	39	66	71	45	52	130	87	12	15	17	31	100	81	2	17	0	68	90	127	11	18	25	54	162	191	39	44	29
GGGVAGALNKATNNA	GGTGGTGGGGTAGCAGGGGCTTTGAATAAAGCTACCAACAATGCG	0	GGGVAGALNKATNNA	0	0	0	17	49	31	47	125	132	106	249	196	94	360	284	14	21	25	51	137	96	5	19	2	63	120	162	17	29	48	72	170	206	40	52	46
GGVAGALNKATNNAM	GGAGGAGTAGCGGGCGCCTTGAACAAAGCAACGAATAATGCAATG	0	GGVAGALNKATNNAM	0	0	0	8	21	26	33	52	101	54	71	117	11	60	129	25	47	23	72	129	167	9	23	0	64	96	239	40	46	142	18	114	257	82	74	160
GVAGALNKATNNAMQ	GGGGTGGCTGGAGCCTTGAATAAAGCCACTAACAATGCAATGCAA	0	GVAGALNKATNNAMQ	0	0	1	10	18	11	15	26	36	18	36	20	3	23	27	16	24	18	31	64	57	2	20	0	33	50	66	28	51	67	20	54	57	28	42	78
VAGALNKATNNAMQV	GTCGCTGGCGCTCTCAATAAGGCAACTAACAATGCTATGCAAGTA	0	VAGALNKATNNAMQV	0	0	0	8	15	21	21	17	49	16	15	33	5	1	13	22	28	16	39	68	51	7	24	0	21	43	67	22	34	47	7	20	29	26	38	43
AGALNKATNNAMQVE	GCCGGAGCCTTAAATAAAGCAACTAATAACGCTATGCAGGTTGAA	0	AGALNKATNNAMQVE	0	0	0	5	36	11	10	65	59	22	144	48	15	214	108	7	7	2	18	60	26	1	5	0	39	45	37	6	8	8	32	108	49	5	26	6
GALNKATNNAMQVES	GGTGCTTTGAATAAAGCCACCAACAATGCGATGCAGGTTGAGTCT	0	GALNKATNNAMQVES	0	0	0	24	45	22	65	157	94	105	307	145	141	573	220	17	35	15	62	195	155	1	19	1	115	217	321	19	38	58	139	383	435	33	89	46
ALNKATNNAMQVESD	GCCTTGAATAAGGCAACTAACAATGCTATGCAGGTGGAATCCGAC	0	ALNKATNNAMQVESD	0	0	0	5	19	17	17	55	46	52	121	74	22	213	123	10	16	11	20	63	27	5	9	1	44	48	74	8	15	21	36	89	68	11	24	20
LNKATNNAMQVESDD	TTGAATAAAGCGACAAACAATGCTATGCAAGTAGAATCTGACGAT	0	LNKATNNAMQVESDD	0	0	0	20	36	32	51	72	97	44	59	94	14	53	65	36	44	25	65	121	129	11	37	1	68	96	128	40	47	101	24	80	111	46	75	143
NKATNNAMQVESDDY	AACAAAGCGACTAATAATGCCATGCAAGTGGAATCGGACGATTAC	0	NKATNNAMQVESDDY	0	0	0	11	1	6	35	1	17	23	0	12	6	0	1	21	19	13	31	11	19	7	17	0	21	0	4	23	13	45	11	2	2	21	3	4
KATNNAMQVESDDYI	AAAGCTACTAATAATGCCATGCAAGTTGAGAGCGATGACTATATT	0	KATNNAMQVESDDYI	0	0	0	2	1	9	6	0	3	4	0	0	0	0	0	20	29	27	26	4	13	3	18	0	15	0	2	19	4	10	5	0	0	24	0	0
ATNNAMQVESDDYIA	GCTACCAATAATGCAATGCAGGTTGAGTCTGACGATTACATCGCT	0	ATNNAMQVESDDYIA	0	0	1	5	0	0	8	0	0	1	0	0	0	0	0	16	32	24	28	10	11	7	23	1	10	1	8	19	6	31	3	0	1	10	1	4
TNNAMQVESDDYIAT	ACGAACAATGCGATGCAGGTCGAATCAGATGACTATATTGCTACT	0	TNNAMQVESDDYIAT	0	0	0	3	0	0	5	0	0	2	0	1	0	0	1	24	37	17	24	11	5	12	24	0	7	0	3	21	7	3	3	0	1	11	1	0
NNAMQVESDDYIATN	AACAACGCTATGCAAGTAGAAAGTGATGATTATATCGCGACAAAT	0	NNAMQVESDDYIATN	0	0	0	0	0	2	0	0	3	0	0	3	0	0	1	21	32	12	37	11	12	8	28	1	12	0	2	20	3	16	0	0	1	12	0	4
NAMQVESDDYIATNG	AATGCTATGCAGGTTGAGTCAGACGATTATATTGCAACTAATGGT	0	NAMQVESDDYIATNG	0	0	0	9	1	0	23	0	0	13	0	0	1	0	0	29	27	21	36	11	1	6	30	1	19	3	1	39	7	5	7	1	0	29	2	3
AMQVESDDYIATNGP	GCGATGCAGGTGGAGAGTGATGACTACATTGCCACCAATGGGCCG	0	AMQVESDDYIATNGP	0	0	0	5	0	0	8	0	0	14	0	0	12	0	1	4	2	6	8	2	1	0	3	0	12	0	2	8	6	13	15	0	0	8	0	0
MQVESDDYIATNGPL	ATGCAAGTGGAATCAGATGATTATATCGCTACAAATGGTCCTTTG	0	MQVESDDYIATNGPL	0	0	0	30	1	6	69	1	10	124	0	3	142	2	1	13	21	26	68	41	19	2	24	0	100	6	2	18	42	39	111	2	0	39	11	5
QVESDDYIATNGPLK	CAAGTCGAATCCGACGACTATATCGCTACTAACGGCCCACTGAAA	0	QVESDDYIATNGPLK	0	0	0	6	6	3	20	5	5	28	3	3	0	1	1	13	17	19	17	3	6	5	8	0	7	1	0	21	6	20	3	2	0	19	1	2
VESDDYIATNGPLKV	GTTGAATCCGACGATTACATCGCGACCAATGGTCCACTGAAGGTG	0	VESDDYIATNGPLKV	0	0	0	3	13	1	9	8	5	7	7	2	1	2	0	11	14	20	14	9	9	3	13	0	13	1	2	18	11	19	3	0	1	21	3	1
ESDDYIATNGPLKVG	GAATCTGACGATTACATCGCTACAAACGGCCCGCTGAAGGTGGGC	0	ESDDYIATNGPLKVG	0	0	0	3	0	0	5	0	0	8	0	0	3	0	0	8	19	24	30	9	4	2	16	1	11	1	0	22	3	24	6	0	0	28	0	2
SDDYIATNGPLKVGG	TCTGATGATTACATCGCTACGAATGGACCTCTCAAAGTAGGTGGT	0	SDDYIATNGPLKVGG	0	0	0	8	0	1	5	0	4	10	0	0	1	0	0	30	28	30	51	12	6	5	35	1	35	1	0	50	12	6	6	1	0	56	0	1
DDYIATNGPLKVGGS	GACGATTATATCGCAACTAATGGTCCGCTTAAAGTTGGCGGGTCC	0	DDYIATNGPLKVGGS	0	0	0	0	0	0	0	0	0	0	0	0	0	0	0	3	4	4	6	1	1	0	4	0	1	0	1	6	3	8	0	0	0	2	0	0
DYIATNGPLKVGGSC	GATTATATTGCTACGAATGGTCCTTTAAAGGTTGGAGGCAGTTGT	0	DYIATNGPLKVGGSC	0	0	0	7	16	5	25	28	11	21	15	15	10	2	2	18	26	27	55	77	48	3	7	2	46	22	24	24	45	88	20	13	6	56	21	31
YIATNGPLKVGGSCV	TATATTGCTACAAATGGGCCTCTTAAAGTCGGCGGCTCATGTGTC	0	YIATNGPLKVGGSCV	0	0	1	5	9	11	6	8	13	6	10	11	3	1	1	10	19	15	22	27	30	6	11	0	7	10	13	16	24	40	2	7	3	15	8	12
IATNGPLKVGGSCVL	ATTGCCACTAACGGTCCATTAAAGGTGGGTGGGTCATGCGTGTTG	0	IATNGPLKVGGSCVL	0	0	3	14	11	14	25	13	16	17	13	5	0	7	1	23	30	14	12	28	16	7	18	0	3	10	7	21	38	60	2	4	1	7	11	8
ATNGPLKVGGSCVLS	GCGACTAATGGCCCATTAAAAGTGGGAGGGAGTTGCGTTCTTAGT	0	ATNGPLKVGGSCVLS	0	0	0	6	0	8	11	0	5	7	0	1	0	0	2	24	38	27	32	48	15	8	31	2	12	7	2	45	40	23	4	10	0	16	15	1
TNGPLKVGGSCVLSG	ACAAATGGACCTCTTAAGGTTGGTGGTTCATGTGTTCTCTCAGGT	0	TNGPLKVGGSCVLSG	0	0	1	11	20	3	17	21	15	15	4	4	0	7	0	32	24	31	22	54	27	16	20	2	14	19	7	32	33	40	7	8	6	20	17	11
NGPLKVGGSCVLSGH	AACGGTCCATTGAAGGTGGGAGGTTCTTGTGTATTGTCAGGACAC	0	NGPLKVGGSCVLSGH	0	0	0	1	5	12	16	4	23	8	1	3	4	2	6	7	15	11	10	38	35	6	6	0	3	10	20	9	22	50	0	3	4	8	13	21
GPLKVGGSCVLSGHN	GGACCCCTCAAAGTAGGTGGTTCCTGCGTGTTAAGCGGTCACAAT	0	GPLKVGGSCVLSGHN	1	0	0	12	9	12	20	33	31	25	16	19	3	20	4	14	23	28	25	33	21	8	19	0	14	13	8	25	19	35	2	7	1	11	8	13
PLKVGGSCVLSGHNL	CCTCTAAAGGTTGGTGGAAGCTGTGTTCTGAGCGGTCATAACTTG	0	PLKVGGSCVLSGHNL	0	0	0	14	28	27	8	44	90	4	26	82	0	20	19	27	46	25	29	57	30	11	18	1	4	22	24	32	17	44	2	5	5	8	10	31
LKVGGSCVLSGHNLA	CTAAAAGTGGGAGGTAGTTGTGTTCTATCAGGACATAACTTAGCT	0	LKVGGSCVLSGHNLA	0	0	0	7	25	14	8	53	35	5	61	16	3	24	8	22	24	16	21	95	21	7	10	0	6	63	23	17	29	53	0	60	5	3	48	43
KVGGSCVLSGHNLAK	AAAGTTGGAGGATCTTGCGTCCTATCTGGTCACAACCTGGCCAAG	0	KVGGSCVLSGHNLAK	0	1	1	1	1	13	3	3	6	1	1	2	1	0	0	18	14	9	7	25	16	5	4	0	1	7	0	8	16	19	1	3	0	0	10	15
VGGSCVLSGHNLAKH	GTTGGTGGTTCATGTGTACTATCCGGGCACAATCTAGCTAAGCAT	0	VGGSCVLSGHNLAKH	0	0	0	0	12	7	0	21	6	0	5	3	0	4	1	13	16	16	9	18	10	4	11	0	2	1	3	8	7	15	0	4	2	5	10	2
GGSCVLSGHNLAKHC	GGAGGCTCATGTGTACTGAGCGGTCATAACTTAGCGAAGCACTGT	0	GGSCVLSGHNLAKHC	0	0	0	1	0	1	5	0	0	1	0	0	0	0	0	11	18	21	6	8	8	10	13	1	3	1	6	5	10	35	0	0	0	6	2	2
GSCVLSGHNLAKHCL	GGTAGTTGCGTATTGTCAGGACATAATCTCGCAAAGCACTGTTTA	0	GSCVLSGHNLAKHCL	0	0	0	0	3	0	1	5	0	1	3	0	1	1	0	17	29	23	17	43	8	11	13	1	5	3	3	15	18	29	0	0	0	2	7	7
SCVLSGHNLAKHCLH	TCTTGTGTTCTATCGGGGCACAATTTAGCAAAACATTGCCTACAT	0	SCVLSGHNLAKHCLH	0	0	0	0	10	0	0	22	0	0	19	0	0	5	0	12	12	8	11	54	1	10	7	0	1	20	0	4	20	1	0	29	0	1	20	0
CVLSGHNLAKHCLHV	TGTGTGTTATCGGGTCATAACTTAGCTAAACATTGCCTACATGTG	0	CVLSGHNLAKHCLHV	0	0	0	0	2	1	3	3	3	0	1	5	0	0	4	19	22	21	13	49	7	6	22	0	1	22	4	10	26	16	1	13	2	1	20	2
VLSGHNLAKHCLHVV	GTCTTGTCTGGTCATAACCTTGCTAAACACTGCTTACATGTAGTT	0	VLSGHNLAKHCLHVV	0	0	0	29	15	11	6	18	8	1	3	4	1	1	4	29	54	38	16	53	8	16	26	2	2	8	1	16	45	15	0	4	1	2	5	1
LSGHNLAKHCLHVVG	CTTAGTGGTCATAACTTAGCTAAGCACTGTCTACATGTAGTTGGA	0	LSGHNLAKHCLHVVG	0	0	0	2	15	0	1	16	0	0	9	0	0	9	1	21	33	33	14	77	2	12	38	7	7	25	2	14	54	9	2	16	0	5	25	6
SGHNLAKHCLHVVGP	TCCGGACATAACCTTGCAAAACATTGTCTACACGTAGTTGGTCCA	0	SGHNLAKHCLHVVGP	0	0	0	3	3	18	2	17	30	4	11	10	1	6	10	22	21	11	13	54	50	14	18	1	6	14	15	18	47	66	5	14	5	7	29	27
GHNLAKHCLHVVGPN	GGTCACAATTTAGCCAAACATTGTCTACATGTGGTCGGGCCAAAC	0	GHNLAKHCLHVVGPN	0	0	0	0	3	1	0	1	15	1	2	7	0	2	3	7	3	9	10	20	8	2	2	1	5	3	10	12	12	17	5	13	1	2	15	4
HNLAKHCLHVVGPNV	CATAACTTAGCTAAACATTGCCTGCATGTCGTCGGCCCTAATGTC	0	HNLAKHCLHVVGPNV	1	0	0	11	4	33	21	6	55	8	7	48	2	4	34	30	22	28	33	68	72	10	18	1	8	24	51	31	38	103	5	17	33	17	17	64
NLAKHCLHVVGPNVN	AACTTAGCAAAGCACTGTCTTCACGTTGTCGGACCCAATGTCAAT	0	NLAKHCLHVVGPNVN	0	0	0	0	17	14	4	18	18	0	20	9	1	4	4	8	12	4	16	24	12	5	26	0	9	6	18	15	18	22	0	7	5	11	10	16
LAKHCLHVVGPNVNK	TTAGCCAAGCATTGTTTGCATGTTGTAGGTCCAAATGTTAATAAG	0	LAKHCLHVVGPNVNK	0	0	0	0	0	3	0	0	1	0	0	0	0	0	0	16	12	8	0	2	3	7	11	0	0	0	0	0	0	2	0	0	0	0	0	0
AKHCLHVVGPNVNKG	GCTAAACATTGTCTTCACGTTGTTGGACCTAACGTAAATAAAGGT	0	AKHCLHVVGPNVNKG	0	0	0	0	3	1	1	3	11	0	1	3	0	0	3	17	28	31	4	26	12	18	16	1	2	2	3	12	18	44	0	1	3	2	3	8
KHCLHVVGPNVNKGE	AAGCATTGTTTACATGTTGTAGGACCAAACGTAAATAAAGGAGAG	0	KHCLHVVGPNVNKGE	0	0	0	13	4	9	16	8	22	10	4	12	1	2	5	9	24	15	15	31	20	8	16	1	4	9	21	16	16	63	7	2	14	5	10	23
HCLHVVGPNVNKGED	CATTGCTTACATGTTGTCGGTCCTAATGTCAACAAAGGGGAGGAT	0	HCLHVVGPNVNKGED	0	0	2	4	0	18	2	0	39	1	2	22	0	0	10	13	12	14	18	22	14	8	10	0	6	5	5	16	19	34	0	5	4	6	8	11
CLHVVGPNVNKGEDI	TGCTTACATGTTGTCGGCCCTAATGTAAACAAAGGGGAAGACATA	0	CLHVVGPNVNKGEDI	0	0	0	0	0	1	0	0	2	0	0	1	1	0	1	23	24	24	9	24	13	10	12	0	2	1	2	8	22	11	0	0	0	2	2	9
LHVVGPNVNKGEDIQ	CTGCACGTGGTGGGACCAAATGTTAATAAGGGAGAAGATATTCAA	0	LHVVGPNVNKGEDIQ	0	0	0	3	0	0	7	0	0	2	0	0	0	0	0	21	25	32	10	4	18	17	23	0	6	0	12	14	6	58	6	1	0	2	1	5
HVVGPNVNKGEDIQL	CACGTTGTTGGACCTAATGTGAATAAAGGAGAAGATATACAATTG	0	HVVGPNVNKGEDIQL	0	1	0	0	0	0	0	0	0	0	0	0	0	0	0	10	21	13	11	3	2	9	8	0	0	0	1	8	5	5	0	0	0	0	1	1
VVGPNVNKGEDIQLL	GTTGTTGGACCTAACGTGAACAAGGGCGAAGACATACAACTATTA	0	VVGPNVNKGEDIQLL	0	0	0	0	0	1	0	0	1	0	0	0	0	0	0	9	16	12	14	4	7	8	17	0	0	0	0	6	1	28	0	0	0	0	0	1
VGPNVNKGEDIQLLK	GTCGGACCTAATGTAAATAAGGGTGAAGATATCCAATTGTTGAAA	0	VGPNVNKGEDIQLLK	0	0	0	0	0	0	0	0	2	0	0	3	0	0	0	8	18	13	7	10	11	8	10	0	0	0	8	4	4	28	1	0	0	1	1	6
GPNVNKGEDIQLLKS	GGACCCAATGTGAATAAAGGCGAGGACATCCAATTACTCAAGAGT	0	GPNVNKGEDIQLLKS	0	0	0	4	4	7	7	5	18	2	3	34	0	1	32	19	27	22	10	58	39	10	10	0	3	34	35	17	43	40	0	15	27	6	25	24
PNVNKGEDIQLLKSA	CCTAATGTAAACAAGGGTGAGGACATTCAGCTATTGAAGTCGGCT	0	PNVNKGEDIQLLKSA	0	0	0	6	34	23	3	76	78	4	88	109	0	67	113	9	27	11	16	41	45	8	12	0	7	32	79	19	24	29	1	30	90	17	34	51
NVNKGEDIQLLKSAY	AACGTTAATAAAGGTGAAGACATCCAGTTACTTAAATCAGCATAT	0	NVNKGEDIQLLKSAY	0	0	1	1	40	31	4	100	73	1	93	94	2	74	141	21	19	19	28	89	82	5	17	1	13	67	156	28	40	40	8	86	254	28	64	39
VNKGEDIQLLKSAYE	GTAAACAAAGGAGAGGATATTCAACTATTGAAATCTGCTTACGAA	0	VNKGEDIQLLKSAYE	0	0	0	0	10	12	0	19	52	0	19	33	1	3	44	15	28	11	7	57	31	14	23	1	5	23	44	10	31	34	0	20	41	3	34	46
NKGEDIQLLKSAYEN	AACAAAGGCGAGGATATTCAGTTACTAAAGTCAGCCTACGAAAAC	0	NKGEDIQLLKSAYEN	0	0	0	0	5	33	0	8	99	0	15	138	0	7	178	16	21	15	11	48	35	10	15	0	4	25	66	5	35	29	1	11	74	3	32	40
KGEDIQLLKSAYENF	AAGGGGGAAGATATACAGTTATTAAAATCCGCCTACGAGAACTTT	0	KGEDIQLLKSAYENF	0	0	0	4	1	5	4	0	42	2	0	52	1	0	39	5	10	5	2	10	22	2	3	0	0	4	35	3	4	9	0	2	36	2	3	24
GEDIQLLKSAYENFN	GGTGAGGATATTCAGTTATTGAAATCAGCATATGAAAATTTCAAC	0	GEDIQLLKSAYENFN	0	0	0	2	6	21	10	18	68	3	14	96	2	6	102	4	14	6	13	37	44	8	6	0	1	28	50	11	12	37	0	12	73	5	22	46
EDIQLLKSAYENFNQ	GAGGACATACAGCTGCTTAAATCGGCCTATGAAAATTTCAACCAA	0	EDIQLLKSAYENFNQ	0	0	0	1	5	2	0	7	14	0	7	18	2	1	12	17	10	10	9	37	27	8	10	2	2	18	57	18	15	36	0	4	59	0	11	20
DIQLLKSAYENFNQH	GATATACAACTCTTAAAATCGGCCTACGAGAATTTTAACCAACAT	0	DIQLLKSAYENFNQH	0	0	0	2	25	54	5	60	155	0	43	180	0	19	200	22	21	11	27	74	87	9	18	0	15	46	146	25	40	50	2	47	207	6	44	81
IQLLKSAYENFNQHE	ATACAATTGCTAAAATCAGCATATGAAAACTTTAATCAACATGAG	0	IQLLKSAYENFNQHE	0	0	0	0	0	1	0	0	4	0	1	3	0	0	0	14	20	11	2	1	0	7	17	0	2	0	0	2	1	0	0	0	0	0	0	0
QLLKSAYENFNQHEV	CAACTGCTCAAGTCAGCCTACGAGAACTTTAACCAACACGAGGTG	0	QLLKSAYENFNQHEV	1	0	0	4	1	0	6	4	0	9	3	0	0	3	0	19	17	33	14	29	11	11	17	0	3	6	1	14	22	40	1	1	0	5	2	4
LLKSAYENFNQHEVL	CTGTTGAAAAGTGCTTACGAAAATTTCAACCAGCATGAAGTTCTA	0	LLKSAYENFNQHEVL	0	0	0	0	0	0	0	0	0	0	0	0	0	0	0	19	15	23	10	2	1	10	21	2	0	2	3	8	0	0	2	3	2	1	3	3
LKSAYENFNQHEVLL	CTGAAATCAGCTTATGAAAATTTCAATCAACACGAGGTTTTGTTG	0	LKSAYENFNQHEVLL	0	0	0	0	0	0	1	0	0	2	0	0	0	0	0	16	18	15	11	6	2	7	11	0	1	0	0	14	1	2	1	1	0	4	0	0
KSAYENFNQHEVLLA	AAATCTGCTTATGAGAATTTTAACCAACATGAAGTTCTATTGGCT	0	KSAYENFNQHEVLLA	0	0	0	9	5	4	10	16	2	28	11	3	3	3	1	14	13	8	47	43	18	2	9	2	39	11	3	14	26	13	32	7	2	40	15	14
SAYENFNQHEVLLAP	AGTGCATACGAGAACTTCAACCAGCATGAGGTTTTGCTGGCACCA	0	SAYENFNQHEVLLAP	0	0	1	5	1	23	15	0	70	21	0	63	10	1	52	8	13	8	43	25	26	3	9	0	54	10	48	18	20	24	52	11	39	60	10	40
AYENFNQHEVLLAPL	GCTTACGAAAACTTCAACCAGCACGAGGTTTTGTTGGCTCCCCTA	0	AYENFNQHEVLLAPL	1	0	1	12	14	20	29	37	78	47	46	84	35	43	123	26	30	25	56	79	126	2	20	1	106	52	136	17	36	38	80	40	158	57	35	55
YENFNQHEVLLAPLL	TACGAGAATTTTAATCAACATGAGGTACTGTTAGCTCCTCTATTA	0	YENFNQHEVLLAPLL	0	0	1	8	36	15	12	106	24	31	146	27	8	236	42	12	14	16	33	161	125	3	15	0	57	177	199	19	22	36	29	370	304	54	55	55
ENFNQHEVLLAPLLS	GAGAATTTTAATCAACATGAGGTTCTACTTGCACCTTTATTGTCT	0	ENFNQHEVLLAPLLS	0	0	0	4	55	29	14	129	65	17	150	72	0	91	27	13	23	15	36	82	74	2	17	1	48	84	71	28	27	81	13	72	56	53	63	95
NFNQHEVLLAPLLSA	AATTTTAACCAGCATGAAGTGCTACTAGCTCCTTTACTTAGTGCT	0	NFNQHEVLLAPLLSA	0	0	0	23	57	39	46	139	109	61	193	126	20	194	106	22	24	32	31	141	84	5	24	1	51	137	97	33	39	79	41	162	98	36	87	96
FNQHEVLLAPLLSAG	TTTAACCAACACGAAGTGTTGTTGGCCCCCCTTTTGAGCGCCGGG	0	FNQHEVLLAPLLSAG	0	0	0	2	16	9	6	17	31	3	39	49	2	25	68	2	9	4	18	50	26	1	3	0	6	44	66	14	10	21	2	59	64	17	39	37
NQHEVLLAPLLSAGI	AATCAACACGAGGTTTTATTGGCACCGTTACTGAGCGCTGGAATA	0	NQHEVLLAPLLSAGI	0	0	0	3	35	13	8	57	23	6	80	41	5	84	35	17	24	16	26	128	49	5	12	0	11	139	83	25	29	21	1	167	107	12	76	28
QHEVLLAPLLSAGIF	CAGCATGAAGTGCTCTTGGCACCCCTATTGAGTGCTGGCATCTTC	0	QHEVLLAPLLSAGIF	1	0	0	0	14	35	0	47	103	1	52	113	0	73	92	29	23	25	34	98	144	11	14	1	25	90	152	40	30	125	2	137	128	22	71	138
HEVLLAPLLSAGIFG	CATGAAGTTTTATTGGCACCACTTCTGTCCGCAGGTATATTTGGT	0	HEVLLAPLLSAGIFG	0	1	1	0	33	4	2	51	23	0	62	30	0	16	6	14	21	23	11	58	42	10	16	1	3	32	30	16	26	53	1	34	15	5	42	64
EVLLAPLLSAGIFGA	GAAGTTCTGTTGGCTCCATTGTTGTCCGCCGGTATATTTGGTGCC	0	EVLLAPLLSAGIFGA	0	0	0	2	17	1	1	32	10	1	59	4	0	38	5	5	3	8	8	29	20	0	3	0	3	16	30	10	4	10	0	21	33	2	10	25
VLLAPLLSAGIFGAD	GTACTTTTAGCTCCATTGTTGTCTGCAGGAATTTTCGGAGCCGAC	0	VLLAPLLSAGIFGAD	0	0	0	0	0	1	0	0	0	0	0	0	0	0	0	6	8	2	0	0	0	2	4	0	0	0	0	0	0	0	0	0	0	0	0	0
LLAPLLSAGIFGADP	CTACTTGCGCCCCTTTTATCAGCAGGTATTTTTGGTGCTGACCCT	0	LLAPLLSAGIFGADP	0	0	0	1	3	4	1	0	1	0	0	0	0	0	0	21	26	17	8	8	7	7	12	0	3	1	4	4	2	13	0	0	2	0	2	7
LAPLLSAGIFGADPI	CTAGCACCCCTGCTGTCCGCCGGAATCTTCGGTGCAGATCCTATA	0	LAPLLSAGIFGADPI	0	0	0	9	20	8	18	21	6	11	15	2	2	10	0	8	9	8	12	10	22	2	2	0	9	7	19	4	3	16	3	0	3	7	4	5
APLLSAGIFGADPIH	GCTCCCCTATTGTCTGCAGGAATCTTCGGCGCCGATCCGATACAC	0	APLLSAGIFGADPIH	0	0	0	5	6	9	14	11	42	26	18	51	18	17	64	5	10	4	24	31	44	1	3	0	43	16	67	8	22	31	46	22	65	19	13	42
PLLSAGIFGADPIHS	CCCCTTTTATCAGCGGGCATATTCGGTGCAGACCCTATCCATTCC	0	PLLSAGIFGADPIHS	0	0	0	13	1	2	33	0	1	39	0	2	15	1	0	11	12	9	25	1	15	2	7	1	26	0	6	12	0	24	22	0	2	23	1	10
LLSAGIFGADPIHSL	TTGCTGAGTGCTGGCATTTTCGGCGCTGATCCAATTCATTCTCTT	0	LLSAGIFGADPIHSL	0	0	0	7	0	0	16	0	0	7	0	0	0	0	0	13	12	15	18	15	12	2	8	0	5	0	0	11	1	6	1	0	0	6	0	0
LSAGIFGADPIHSLR	CTAAGTGCAGGAATTTTTGGTGCTGATCCAATTCATTCGTTAAGA	0	LSAGIFGADPIHSLR	0	0	0	1	0	6	15	0	4	12	0	0	3	0	1	1	6	5	13	10	6	3	2	0	12	0	0	3	6	3	6	0	0	12	0	1
SAGIFGADPIHSLRV	TCAGCAGGCATTTTTGGCGCTGATCCAATTCATTCCTTGAGAGTT	0	SAGIFGADPIHSLRV	0	1	1	13	1	18	32	0	50	65	0	34	28	0	7	14	19	24	54	22	57	1	16	0	77	5	57	26	14	101	77	0	30	61	11	66
AGIFGADPIHSLRVC	GCAGGAATATTCGGAGCTGATCCAATCCACTCACTACGTGTATGT	0	AGIFGADPIHSLRVC	0	0	0	2	7	24	4	30	49	3	34	77	4	33	112	3	5	3	18	24	20	0	1	1	29	4	19	2	8	5	21	16	23	10	13	17
GIFGADPIHSLRVCV	GGTATTTTTGGTGCAGATCCAATCCATTCTCTGAGAGTGTGTGTT	0	GIFGADPIHSLRVCV	0	1	0	38	34	17	73	53	55	101	65	67	44	37	74	13	23	20	44	55	55	2	13	0	70	41	61	24	27	49	58	41	73	52	42	57
IFGADPIHSLRVCVD	ATATTTGGAGCAGATCCCATTCATTCTCTACGTGTCTGCGTTGAC	0	IFGADPIHSLRVCVD	0	0	0	7	26	23	21	24	89	29	8	65	19	3	52	13	20	15	49	30	24	3	14	0	57	12	22	15	4	40	48	4	15	43	9	22
FGADPIHSLRVCVDT	TTCGGCGCTGACCCTATCCACTCACTAAGAGTTTGTGTCGATACT	0	FGADPIHSLRVCVDT	0	0	0	29	13	5	111	47	44	161	39	40	86	30	34	14	18	14	37	35	78	2	11	0	61	10	116	21	9	76	64	13	135	41	28	45
GADPIHSLRVCVDTV	GGAGCCGACCCTATCCACTCGTTGAGGGTCTGCGTTGATACTGTT	0	GADPIHSLRVCVDTV	0	0	0	7	23	21	45	106	36	68	135	61	49	159	110	15	23	22	37	67	70	1	18	0	86	48	120	14	20	36	95	70	171	53	30	26
ADPIHSLRVCVDTVR	GCCGACCCTATTCACTCACTAAGGGTGTGTGTTGATACTGTTAGA	0	ADPIHSLRVCVDTVR	0	0	0	17	6	15	38	8	32	98	13	42	36	7	32	12	29	26	39	55	65	5	12	0	46	20	64	30	25	62	24	29	69	38	23	50
DPIHSLRVCVDTVRT	GATCCTATTCATTCTTTAAGGGTTTGTGTCGACACCGTACGGACT	0	DPIHSLRVCVDTVRT	0	0	0	7	0	23	15	0	70	14	0	84	4	0	69	8	7	13	31	40	35	5	11	0	19	28	32	19	11	21	5	23	21	18	33	26
PIHSLRVCVDTVRTN	CCCATCCATTCCCTCCGTGTTTGCGTAGATACTGTTAGAACCAAT	0	PIHSLRVCVDTVRTN	0	0	0	1	0	1	0	0	0	0	0	2	0	0	0	19	25	19	7	8	3	14	22	0	1	3	1	13	14	14	1	0	0	3	5	2
IHSLRVCVDTVRTNV	ATCCATTCGTTAAGAGTATGCGTCGATACGGTAAGAACAAATGTC	0	IHSLRVCVDTVRTNV	0	0	0	0	1	0	0	0	1	0	0	0	0	0	0	27	41	22	5	10	0	5	14	0	0	2	0	3	3	0	1	1	0	0	0	0
HSLRVCVDTVRTNVY	CATTCGTTAAGAGTATGCGTAGATACAGTTAGAACAAATGTTTAT	0	HSLRVCVDTVRTNVY	0	0	0	0	5	11	6	7	21	1	3	14	1	3	3	13	26	13	26	17	37	8	22	1	5	6	23	22	12	39	3	0	10	11	4	43
SLRVCVDTVRTNVYL	TCTTTACGCGTGTGTGTAGATACTGTCCGGACCAATGTTTACTTA	0	SLRVCVDTVRTNVYL	0	0	0	5	0	3	2	0	5	0	0	6	0	0	0	3	16	8	8	3	1	3	10	0	0	0	0	4	2	4	0	0	0	0	0	0
LRVCVDTVRTNVYLA	CTAAGGGTCTGCGTTGACACAGTAAGAACTAACGTATATCTTGCT	0	LRVCVDTVRTNVYLA	0	0	1	2	0	1	7	0	4	1	0	0	2	0	1	17	26	21	7	12	8	20	20	0	1	0	0	8	9	17	1	0	0	2	0	0
RVCVDTVRTNVYLAV	CGTGTTTGTGTGGACACTGTTAGAACGAATGTTTATTTGGCCGTT	0	RVCVDTVRTNVYLAV	1	0	0	8	5	21	16	5	45	5	1	24	1	0	4	21	26	22	18	12	47	15	16	2	5	2	16	26	6	81	1	1	11	18	1	33
VCVDTVRTNVYLAVF	GTTTGTGTTGACACTGTGAGAACTAATGTTTACTTAGCTGTTTTT	0	VCVDTVRTNVYLAVF	0	0	1	2	0	5	2	1	5	0	0	5	0	0	0	18	35	22	7	13	7	12	17	0	6	4	1	14	18	13	1	2	0	6	3	4
CVDTVRTNVYLAVFD	TGTGTGGATACGGTTAGAACCAACGTGTATCTAGCAGTATTTGAC	0	CVDTVRTNVYLAVFD	0	0	0	9	0	10	19	0	8	15	0	7	3	0	2	10	24	20	23	14	16	7	19	0	4	4	1	15	7	41	1	0	0	6	2	13
VDTVRTNVYLAVFDK	GTCGACACGGTTAGAACTAACGTTTATTTAGCAGTTTTCGATAAA	0	VDTVRTNVYLAVFDK	0	0	0	29	0	5	46	0	6	35	0	5	4	0	1	31	22	21	33	21	7	10	30	1	25	3	5	33	16	40	12	1	0	39	2	9
DTVRTNVYLAVFDKN	GATACAGTTCGTACTAATGTATATCTAGCTGTATTTGACAAAAAT	0	DTVRTNVYLAVFDKN	0	0	0	1	0	2	12	0	5	17	0	2	6	1	0	9	14	6	24	20	7	3	9	1	19	0	1	20	5	9	23	0	0	21	2	5
TVRTNVYLAVFDKNL	ACAGTCCGGACAAACGTATACCTAGCAGTATTTGATAAAAATCTA	0	TVRTNVYLAVFDKNL	0	0	0	1	0	2	0	0	1	0	0	3	0	0	0	12	17	8	16	1	14	9	15	0	4	0	2	4	4	26	1	0	1	7	0	8
VRTNVYLAVFDKNLY	GTCAGAACTAACGTCTATTTGGCTGTCTTTGATAAGAATCTATAC	0	VRTNVYLAVFDKNLY	0	0	0	19	1	2	47	0	0	32	1	0	8	0	0	15	24	9	34	10	21	1	13	0	22	0	6	33	9	44	16	0	5	38	1	6
RTNVYLAVFDKNLYD	CGAACCAATGTCTATCTAGCTGTTTTTGATAAAAACTTGTATGAC	0	RTNVYLAVFDKNLYD	0	0	0	3	0	6	4	0	3	4	0	0	0	0	0	11	7	12	23	0	8	2	19	0	9	0	3	10	0	21	6	0	1	11	2	4
TNVYLAVFDKNLYDK	ACCAACGTTTATTTGGCCGTTTTTGATAAGAATCTGTATGACAAA	0	TNVYLAVFDKNLYDK	0	0	1	3	1	6	9	2	11	4	1	1	1	0	0	11	18	10	27	8	16	7	16	1	14	3	5	32	4	21	3	0	3	24	0	4
NVYLAVFDKNLYDKL	AATGTATACTTGGCCGTTTTTGATAAAAACCTGTATGATAAATTA	0	NVYLAVFDKNLYDKL	0	1	0	2	0	0	4	0	2	3	0	2	1	0	0	17	18	8	9	4	3	4	16	1	6	0	1	16	2	6	0	0	0	6	0	0
VYLAVFDKNLYDKLV	GTCTATCTTGCAGTTTTCGATAAAAATCTGTATGACAAACTTGTT	0	VYLAVFDKNLYDKLV	0	0	0	0	0	0	0	0	0	0	0	0	0	0	0	12	18	18	0	0	0	2	12	0	0	0	0	0	0	0	0	0	0	0	0	0
YLAVFDKNLYDKLVS	TACCTGGCAGTGTTCGACAAAAATTTGTATGACAAATTAGTATCT	0	YLAVFDKNLYDKLVS	0	0	0	0	0	0	0	0	0	0	0	0	0	0	0	19	21	12	3	4	0	5	14	0	1	0	0	2	3	0	0	0	0	1	0	0
LAVFDKNLYDKLVSS	TTGGCCGTTTTTGACAAGAACTTGTATGATAAGCTAGTCTCGTCG	0	LAVFDKNLYDKLVSS	0	0	0	0	0	1	0	0	1	0	1	1	0	0	0	16	25	13	14	0	4	5	12	1	3	0	0	14	3	8	1	0	0	2	0	0
AVFDKNLYDKLVSSF	GCCGTTTTTGATAAAAATTTATATGACAAATTGGTTAGCTCATTT	0	AVFDKNLYDKLVSSF	0	0	0	0	3	0	0	1	0	0	0	0	0	0	0	3	14	10	19	2	0	5	14	1	7	0	1	7	1	4	2	0	0	7	1	0
VFDKNLYDKLVSSFL	GTCTTTGATAAAAATCTTTACGACAAGCTAGTGAGCTCTTTCCTA	0	VFDKNLYDKLVSSFL	0	0	0	0	0	2	0	0	1	0	0	1	0	0	0	23	14	11	2	1	0	13	16	0	0	0	0	9	2	0	0	0	0	2	2	0
FDKNLYDKLVSSFLE	TTCGATAAGAACTTATACGACAAACTTGTATCTAGCTTCCTGGAG	0	FDKNLYDKLVSSFLE	1	0	0	0	0	0	1	0	0	1	0	0	1	0	0	12	23	12	9	12	0	4	22	0	4	1	0	14	9	0	1	0	0	5	0	0
DKNLYDKLVSSFLEM	GACAAAAATTTATACGATAAACTAGTTTCAAGTTTCTTGGAAATG	0	DKNLYDKLVSSFLEM	0	0	0	1	0	0	0	0	0	0	0	0	0	0	0	9	12	4	12	8	9	11	6	0	0	2	0	8	6	24	0	0	0	2	2	6
KNLYDKLVSSFLEMK	AAAAATCTATATGATAAATTAGTCAGTTCCTTTCTAGAGATGAAG	0	KNLYDKLVSSFLEMK	0	0	0	0	0	0	0	0	0	0	0	0	0	0	0	14	17	8	0	0	3	4	5	1	0	0	0	2	0	5	0	0	0	1	0	0
NLYDKLVSSFLEMKS	AATCTTTATGATAAATTAGTTTCTTCATTCCTTGAGATGAAATCA	0	NLYDKLVSSFLEMKS	0	0	0	12	8	12	14	10	24	15	1	11	3	0	3	17	20	18	29	13	16	5	10	1	24	3	5	19	14	29	14	0	1	23	5	8
LYDKLVSSFLEMKSE	CTATACGATAAATTAGTTTCTTCATTTCTTGAGATGAAATCCGAA	0	LYDKLVSSFLEMKSE	0	0	0	0	0	1	0	0	2	0	0	4	0	0	0	13	14	10	0	8	0	5	18	0	4	3	0	2	1	0	0	1	0	1	4	2
YDKLVSSFLEMKSEK	TACGATAAGTTGGTGTCATCTTTTCTTGAGATGAAGTCGGAAAAG	0	YDKLVSSFLEMKSEK	0	0	0	10	14	9	28	4	6	23	3	1	10	0	1	22	31	24	22	5	7	10	15	1	14	0	4	27	5	10	4	0	2	16	1	4
DKLVSSFLEMKSEKQ	GATAAATTAGTTTCTTCTTTTCTAGAAATGAAATCAGAAAAGCAA	0	DKLVSSFLEMKSEKQ	0	0	0	19	19	16	41	30	45	91	75	48	77	42	41	11	14	5	32	75	54	1	11	0	69	85	64	4	15	33	71	97	98	12	63	53
KLVSSFLEMKSEKQV	AAGTTAGTAAGTTCTTTTTTGGAAATGAAATCAGAAAAGCAGGTG	0	KLVSSFLEMKSEKQV	0	0	0	11	17	1	53	24	9	74	23	9	53	8	3	11	15	10	50	35	18	3	13	1	60	15	19	12	19	34	75	10	16	43	21	22
LVSSFLEMKSEKQVE	CTAGTAAGTTCCTTCTTAGAGATGAAATCAGAAAAACAAGTTGAA	0	LVSSFLEMKSEKQVE	0	1	0	2	0	0	0	0	0	0	0	0	0	1	0	21	9	8	3	5	5	6	13	1	2	0	1	4	5	5	0	0	0	0	0	1
VSSFLEMKSEKQVEQ	GTTAGCTCTTTTTTGGAAATGAAATCTGAGAAGCAAGTAGAACAA	0	VSSFLEMKSEKQVEQ	0	0	1	24	14	25	45	29	36	40	18	13	17	8	12	21	20	16	35	19	8	9	22	1	29	13	7	24	16	11	17	3	3	18	9	9
SSFLEMKSEKQVEQK	AGTTCCTTCCTGGAAATGAAATCAGAAAAACAGGTGGAACAAAAG	0	SSFLEMKSEKQVEQK	0	0	1	27	82	33	58	173	77	125	300	84	157	366	149	17	17	13	36	126	73	4	9	0	75	150	90	5	30	31	109	229	120	10	75	44
SFLEMKSEKQVEQKI	AGTTTCCTTGAAATGAAGTCTGAAAAGCAAGTTGAGCAAAAAATT	0	SFLEMKSEKQVEQKI	0	1	1	30	57	28	95	140	135	220	211	116	235	240	156	16	28	17	65	128	78	1	19	0	126	175	105	5	30	35	166	215	158	29	68	35
FLEMKSEKQVEQKIA	TTCTTAGAAATGAAATCTGAAAAGCAAGTAGAGCAAAAAATCGCT	0	FLEMKSEKQVEQKIA	0	0	0	20	5	9	54	13	11	72	16	16	64	2	2	12	8	6	31	37	26	2	8	0	38	32	11	10	8	33	38	23	10	23	18	12
LEMKSEKQVEQKIAE	TTGGAAATGAAGAGTGAAAAGCAAGTAGAACAAAAAATCGCGGAA	0	LEMKSEKQVEQKIAE	0	0	1	0	12	3	0	26	5	0	15	6	0	4	1	9	7	8	4	6	2	4	14	1	2	3	0	6	1	5	0	2	1	1	7	0
EMKSEKQVEQKIAEI	GAAATGAAATCTGAGAAGCAAGTTGAACAGAAGATTGCAGAGATT	0	EMKSEKQVEQKIAEI	0	0	0	0	12	14	0	35	20	1	13	16	0	3	1	27	35	23	25	34	14	16	24	1	4	18	6	31	37	14	1	12	3	13	24	5
MKSEKQVEQKIAEIP	ATGAAGTCGGAAAAGCAGGTGGAACAAAAAATCGCAGAAATCCCT	0	MKSEKQVEQKIAEIP	0	0	0	0	0	4	0	0	2	0	0	1	0	0	0	13	26	12	12	15	1	12	18	1	4	3	0	9	3	6	0	0	0	2	1	0
KSEKQVEQKIAEIPK	AAGTCAGAAAAACAAGTAGAGCAAAAGATTGCAGAAATTCCTAAA	0	KSEKQVEQKIAEIPK	0	0	0	5	0	0	9	0	0	2	0	0	2	1	0	17	21	10	5	2	3	13	14	0	1	0	12	5	5	2	0	0	8	0	0	3
SEKQVEQKIAEIPKE	AGCGAAAAACAAGTTGAACAGAAGATTGCAGAAATTCCTAAGGAG	0	SEKQVEQKIAEIPKE	0	0	0	2	0	0	0	0	0	2	0	0	0	0	0	7	21	14	2	22	14	8	14	0	1	0	1	3	14	33	1	0	0	0	3	1
EKQVEQKIAEIPKEE	GAAAAACAAGTCGAACAAAAAATAGCTGAGATCCCTAAGGAAGAG	0	EKQVEQKIAEIPKEE	0	0	1	0	0	0	0	0	0	0	0	1	1	0	0	22	26	26	10	6	5	16	16	0	6	1	0	3	9	2	3	1	0	1	2	4
KQVEQKIAEIPKEEV	AAGCAAGTTGAGCAGAAGATAGCAGAAATTCCTAAGGAAGAAGTG	0	KQVEQKIAEIPKEEV	0	0	1	2	0	0	6	0	0	1	0	0	0	0	0	9	17	22	5	20	0	11	26	0	1	0	0	5	13	0	0	0	0	1	0	0
QVEQKIAEIPKEEVK	CAGGTGGAACAAAAGATTGCTGAAATTCCCAAAGAAGAAGTGAAA	0	QVEQKIAEIPKEEVK	0	0	0	2	0	3	2	0	2	0	0	0	0	0	1	16	26	15	3	8	4	14	19	0	3	1	2	10	7	4	0	0	2	3	0	3
VEQKIAEIPKEEVKP	GTTGAACAGAAGATTGCAGAAATCCCAAAAGAAGAAGTGAAGCCA	0	VEQKIAEIPKEEVKP	0	0	0	0	0	0	0	0	0	0	0	0	0	0	0	16	19	7	10	2	3	7	7	0	0	0	0	3	0	5	0	0	0	3	1	0
EQKIAEIPKEEVKPF	GAGCAGAAGATAGCTGAGATACCCAAAGAGGAAGTAAAACCATTT	0	EQKIAEIPKEEVKPF	0	0	0	2	3	2	3	1	0	0	0	0	0	2	0	17	21	22	4	9	11	12	16	2	0	2	2	8	5	17	0	0	0	1	1	3
QKIAEIPKEEVKPFI	CAAAAAATCGCGGAAATTCCGAAAGAAGAAGTTAAACCATTTATT	0	QKIAEIPKEEVKPFI	0	0	0	0	0	2	1	3	1	0	3	1	0	0	0	13	13	11	18	35	7	10	16	1	4	2	4	6	20	16	0	3	0	1	7	6
KIAEIPKEEVKPFIT	AAAATAGCTGAGATCCCAAAGGAAGAAGTGAAGCCCTTCATTACT	0	KIAEIPKEEVKPFIT	0	0	0	2	5	16	5	6	66	5	3	67	2	2	51	19	9	11	14	27	55	7	10	2	2	20	44	13	17	37	1	8	41	6	16	36
IAEIPKEEVKPFITE	ATTGCCGAGATCCCGAAGGAAGAAGTGAAGCCTTTTATTACCGAG	0	IAEIPKEEVKPFITE	0	0	0	15	9	25	51	30	60	78	41	90	39	33	83	10	10	9	22	34	48	2	5	0	26	36	44	11	28	17	21	27	38	29	23	26
AEIPKEEVKPFITES	GCCGAAATTCCTAAAGAGGAAGTTAAACCTTTCATTACAGAGTCA	0	AEIPKEEVKPFITES	1	0	0	9	33	24	25	74	72	35	76	80	21	42	92	11	13	14	27	38	70	1	20	0	45	16	100	13	19	43	19	33	106	26	18	44
EIPKEEVKPFITESK	GAAATTCCAAAGGAAGAGGTTAAACCATTTATTACAGAATCTAAG	0	EIPKEEVKPFITESK	0	0	1	0	41	20	0	86	46	0	109	40	0	66	41	20	17	8	13	44	40	3	9	0	3	38	67	24	23	26	2	44	69	0	38	40
IPKEEVKPFITESKP	ATTCCGAAAGAAGAAGTGAAACCGTTTATTACTGAAAGTAAACCA	0	IPKEEVKPFITESKP	0	1	0	3	12	35	3	19	93	5	30	115	0	11	88	21	18	18	32	69	53	11	15	0	8	52	66	24	32	48	1	55	65	4	44	58
PKEEVKPFITESKPS	CCTAAGGAAGAGGTAAAACCATTTATCACAGAAAGTAAGCCTAGC	0	PKEEVKPFITESKPS	0	0	0	0	4	2	1	6	8	0	9	12	0	4	6	7	11	11	6	11	17	4	11	0	1	7	14	7	6	22	2	4	5	3	6	30
KEEVKPFITESKPSV	AAGGAAGAAGTAAAGCCATTCATTACAGAATCAAAACCATCCGTC	0	KEEVKPFITESKPSV	0	0	0	2	14	25	24	45	59	8	72	61	2	56	79	14	13	13	18	81	55	3	9	0	12	62	73	15	21	29	6	143	112	25	57	49
EEVKPFITESKPSVE	GAGGAAGTCAAACCTTTCATAACAGAAAGCAAACCCTCCGTCGAA	0	EEVKPFITESKPSVE	0	0	0	0	31	30	3	99	88	4	144	99	0	101	75	17	20	15	27	92	37	8	23	0	5	85	58	21	28	23	3	90	52	4	71	50
EVKPFITESKPSVEQ	GAAGTGAAGCCATTTATAACAGAAAGCAAGCCTTCTGTTGAGCAA	0	EVKPFITESKPSVEQ	0	0	0	1	24	30	0	62	99	1	91	131	1	95	119	22	16	22	39	133	104	5	25	0	12	129	114	23	45	58	6	167	156	15	103	101
VKPFITESKPSVEQR	GTAAAGCCATTCATTACAGAATCAAAGCCTAGTGTTGAGCAGAGG	0	VKPFITESKPSVEQR	0	0	1	1	5	31	5	10	98	3	19	79	0	6	50	25	24	20	9	31	11	10	16	0	7	5	7	24	30	19	0	4	8	7	11	14
KPFITESKPSVEQRK	AAGCCTTTTATAACTGAGAGCAAACCGTCTGTGGAACAGAGAAAA	0	KPFITESKPSVEQRK	0	0	0	0	0	20	0	0	50	0	0	46	0	0	18	19	21	16	16	9	14	8	11	0	1	1	8	18	11	19	0	4	5	6	1	8
PFITESKPSVEQRKQ	CCCTTCATTACTGAAAGTAAGCCATCTGTTGAACAGCGGAAACAA	0	PFITESKPSVEQRKQ	0	0	0	0	0	0	0	0	0	0	0	0	0	0	0	10	9	4	2	12	10	8	11	0	0	2	2	0	3	8	0	0	0	0	0	0
FITESKPSVEQRKQD	TTCATTACGGAATCTAAGCCAAGCGTGGAACAACGGAAGCAGGAT	0	FITESKPSVEQRKQD	0	0	0	0	2	1	0	10	1	0	9	2	0	5	1	18	11	19	4	12	10	13	8	1	0	1	1	2	4	20	0	0	0	1	4	1
ITESKPSVEQRKQDD	ATCACAGAGTCTAAGCCATCAGTAGAGCAAAGAAAGCAAGATGAT	0	ITESKPSVEQRKQDD	0	0	0	0	4	0	0	3	0	1	1	0	0	0	0	22	29	20	4	15	8	17	18	1	3	1	0	6	5	19	0	0	0	4	2	1
TESKPSVEQRKQDDK	ACGGAATCCAAGCCCTCAGTGGAACAAAGAAAACAGGACGATAAA	0	TESKPSVEQRKQDDK	0	0	0	0	0	0	0	0	0	0	0	0	0	0	0	13	14	19	1	1	2	10	14	0	2	0	1	10	1	3	0	1	0	1	0	0
ESKPSVEQRKQDDKK	GAGTCTAAACCTTCGGTTGAGCAACGCAAGCAAGATGATAAAAAG	0	ESKPSVEQRKQDDKK	0	0	0	2	0	0	7	0	0	2	0	0	0	0	0	27	33	24	7	5	6	17	26	3	2	1	7	5	4	21	0	3	8	4	1	11
SKPSVEQRKQDDKKI	TCAAAACCATCTGTCGAGCAAAGAAAACAAGATGATAAAAAAATC	0	SKPSVEQRKQDDKKI	0	0	0	0	0	0	0	0	0	0	0	0	0	0	0	15	6	14	5	0	2	12	20	0	0	0	0	7	2	6	0	0	0	0	0	3
KPSVEQRKQDDKKIK	AAACCTTCAGTTGAGCAACGAAAACAAGATGATAAAAAAATCAAG	0	KPSVEQRKQDDKKIK	0	0	0	0	0	0	0	0	0	0	0	1	0	0	0	13	10	17	1	3	0	8	14	1	2	1	0	0	6	0	0	2	0	0	2	0
PSVEQRKQDDKKIKA	CCTTCAGTGGAACAAAGGAAGCAAGATGATAAAAAGATCAAGGCA	0	PSVEQRKQDDKKIKA	0	0	1	0	0	0	0	0	0	0	0	0	0	0	0	14	21	8	2	1	0	8	16	0	2	0	0	1	0	0	1	0	0	1	0	0
SVEQRKQDDKKIKAC	AGCGTAGAACAACGTAAGCAAGACGATAAGAAAATTAAGGCATGC	0	SVEQRKQDDKKIKAC	0	0	0	0	0	0	0	0	0	0	0	0	0	0	2	13	22	16	4	3	2	6	18	0	2	2	2	4	1	13	0	0	0	2	2	0
VEQRKQDDKKIKACV	GTAGAGCAGAGGAAGCAAGACGATAAGAAAATCAAAGCATGCGTG	0	VEQRKQDDKKIKACV	0	0	0	0	0	1	1	0	1	0	0	0	0	0	0	17	32	28	4	3	5	20	30	0	2	0	6	4	0	7	1	0	9	1	0	6
EQRKQDDKKIKACVE	GAACAAAGAAAGCAAGATGACAAAAAGATCAAGGCATGTGTAGAG	0	EQRKQDDKKIKACVE	0	0	0	3	6	5	4	10	2	3	0	0	0	1	0	27	32	33	6	6	0	22	29	2	2	0	0	4	9	0	1	0	0	5	0	0
QRKQDDKKIKACVEE	CAACGTAAACAGGATGATAAGAAGATTAAAGCATGTGTTGAAGAG	0	QRKQDDKKIKACVEE	0	0	0	0	0	0	0	0	0	0	0	0	0	0	0	24	33	20	6	1	4	11	18	1	1	0	0	5	1	4	0	1	2	1	0	5
RKQDDKKIKACVEEV	AGGAAACAAGATGATAAAAAGATTAAAGCATGCGTGGAAGAAGTT	0	RKQDDKKIKACVEEV	0	0	0	1	1	0	0	1	0	0	2	0	0	0	0	20	32	20	3	9	4	13	24	0	0	7	1	7	3	5	0	0	1	5	4	2
KQDDKKIKACVEEVT	AAACAGGACGATAAAAAGATAAAAGCATGTGTGGAAGAGGTCACC	0	KQDDKKIKACVEEVT	0	0	0	0	0	0	0	0	0	0	0	0	0	0	0	0	0	1	1	0	0	1	1	0	0	0	0	0	0	0	0	0	0	0	0	0
QDDKKIKACVEEVTT	CAAGATGACAAAAAAATAAAAGCCTGTGTTGAAGAGGTTACTACT	0	QDDKKIKACVEEVTT	0	0	1	1	7	12	3	4	32	0	4	24	1	1	27	15	15	13	17	12	15	7	12	0	5	5	25	13	3	24	3	4	12	9	4	16
DDKKIKACVEEVTTT	GACGACAAAAAAATTAAAGCCTGTGTGGAAGAAGTTACTACAACC	0	DDKKIKACVEEVTTT	0	0	0	1	6	0	4	2	3	2	5	8	0	3	4	1	2	1	2	4	13	2	0	0	1	1	13	4	5	16	0	2	19	4	2	15
DKKIKACVEEVTTTL	GACAAGAAAATAAAAGCTTGCGTAGAGGAAGTAACTACCACCCTT	0	DKKIKACVEEVTTTL	0	0	0	4	20	21	0	39	49	2	10	35	1	6	37	8	11	12	9	15	17	3	15	0	2	4	22	19	7	9	0	1	18	2	2	19
KKIKACVEEVTTTLE	AAAAAGATCAAGGCCTGTGTCGAGGAAGTGACGACTACTTTAGAA	0	KKIKACVEEVTTTLE	0	0	0	9	0	27	3	0	47	1	1	17	1	0	3	22	23	24	16	7	13	10	20	0	2	0	7	9	7	41	1	0	2	0	1	15
KIKACVEEVTTTLEE	AAAATAAAAGCATGCGTTGAAGAAGTTACAACAACTTTAGAAGAG	0	KIKACVEEVTTTLEE	0	0	0	0	0	8	0	0	6	0	0	1	0	0	0	13	17	17	2	4	1	7	21	0	1	0	4	2	4	4	0	0	3	1	0	8
IKACVEEVTTTLEET	ATAAAAGCTTGTGTGGAGGAGGTTACTACAACTCTAGAAGAAACT	0	IKACVEEVTTTLEET	0	0	0	1	0	3	0	0	0	0	0	3	0	0	0	17	23	24	2	6	2	11	19	1	0	1	0	2	3	2	0	0	0	1	0	1
KACVEEVTTTLEETK	AAAGCATGCGTGGAAGAGGTTACCACTACATTAGAGGAAACTAAG	0	KACVEEVTTTLEETK	0	0	0	1	12	18	3	2	31	2	1	12	0	0	3	21	21	23	12	20	12	8	17	2	1	0	1	11	9	25	3	1	0	6	4	2
ACVEEVTTTLEETKF	GCTTGCGTTGAGGAGGTGACTACAACTCTAGAGGAAACCAAGTTC	0	ACVEEVTTTLEETKF	0	0	0	0	0	13	6	0	7	3	0	6	1	0	1	30	33	18	24	25	21	16	21	0	7	1	1	30	14	29	3	0	0	15	5	7
CVEEVTTTLEETKFL	TGTGTTGAAGAGGTTACTACAACTCTGGAAGAGACTAAGTTCCTT	0	CVEEVTTTLEETKFL	0	0	0	19	8	8	26	18	14	12	5	8	4	0	0	24	39	22	26	13	10	14	23	1	10	0	2	32	11	14	3	1	0	9	1	1
VEEVTTTLEETKFLT	GTTGAGGAAGTCACGACGACTTTAGAAGAAACTAAATTTTTAACA	0	VEEVTTTLEETKFLT	0	0	0	0	0	0	0	0	0	0	0	0	0	0	0	15	10	6	9	2	4	5	13	0	4	0	0	5	5	6	1	0	0	3	1	0
EEVTTTLEETKFLTE	GAAGAAGTCACAACAACATTGGAAGAGACGAAGTTTCTGACAGAA	0	EEVTTTLEETKFLTE	0	0	0	10	0	0	8	0	5	2	0	1	0	1	1	18	25	28	33	11	14	8	27	1	1	1	7	23	7	29	1	0	1	10	2	5
EVTTTLEETKFLTEN	GAAGTCACTACCACCCTAGAGGAAACTAAATTTCTTACTGAAAAC	0	EVTTTLEETKFLTEN	0	0	0	3	0	0	5	0	0	5	0	0	0	1	0	22	13	15	15	3	7	7	18	0	7	0	0	19	1	10	0	0	0	8	0	0
VTTTLEETKFLTENL	GTAACGACAACACTAGAAGAAACTAAATTTTTAACGGAAAATTTA	0	VTTTLEETKFLTENL	0	0	0	9	0	0	12	0	1	8	0	0	0	0	0	20	6	6	16	1	1	4	2	0	13	0	3	17	3	4	4	0	0	18	0	1
TTTLEETKFLTENLL	ACAACCACCTTGGAGGAGACCAAGTTTCTTACTGAAAACTTATTG	0	TTTLEETKFLTENLL	0	0	0	6	0	0	11	0	0	21	0	0	11	0	0	14	5	4	21	5	0	3	9	0	28	0	0	13	2	0	26	0	0	28	3	0
TTLEETKFLTENLLL	ACTACGTTGGAAGAGACAAAATTCTTGACTGAAAACTTGCTGTTA	0	TTLEETKFLTENLLL	0	0	1	10	0	4	65	0	2	80	0	0	47	0	0	19	30	24	64	8	9	3	14	2	68	0	3	26	4	24	68	0	1	64	1	9
TLEETKFLTENLLLY	ACTCTGGAAGAAACTAAATTCTTAACGGAAAATTTGTTGTTGTAC	0	TLEETKFLTENLLLY	0	0	0	1	0	0	1	0	0	4	0	0	0	0	0	11	8	15	10	4	0	8	12	0	7	0	0	20	6	3	0	0	0	3	0	0
LEETKFLTENLLLYI	TTGGAAGAGACAAAGTTCCTGACCGAAAATTTGTTGTTATACATT	0	LEETKFLTENLLLYI	0	0	0	0	0	0	0	0	0	0	0	0	2	0	0	12	16	19	16	6	3	6	16	3	5	3	4	15	7	9	1	0	0	4	0	5
EETKFLTENLLLYID	GAAGAAACAAAATTTTTGACTGAAAATTTATTATTATATATAGAC	0	EETKFLTENLLLYID	0	0	0	1	0	0	2	0	2	0	0	1	0	0	0	5	4	2	6	4	3	5	9	0	2	0	1	5	0	3	0	0	0	2	1	3
ETKFLTENLLLYIDI	GAAACAAAATTCCTAACAGAGAATCTATTGTTGTATATTGACATC	0	ETKFLTENLLLYIDI	0	0	0	0	1	1	0	0	6	2	0	3	0	0	2	7	12	9	9	10	5	6	7	0	0	0	4	5	10	7	0	0	2	0	1	4
TKFLTENLLLYIDIN	ACCAAATTTTTGACCGAAAACCTATTATTATATATCGATATTAAT	0	TKFLTENLLLYIDIN	0	0	0	5	0	5	9	0	13	19	0	3	3	0	4	14	9	5	9	4	5	5	7	1	6	0	6	8	4	1	7	0	1	9	0	1
KFLTENLLLYIDING	AAGTTTTTGACAGAAAACTTGTTATTGTATATAGACATTAATGGA	0	KFLTENLLLYIDING	0	0	0	12	2	20	43	1	37	42	0	34	15	1	20	18	21	10	35	6	14	5	17	0	40	0	17	17	4	26	29	0	4	33	1	10
FLTENLLLYIDINGN	TTCCTCACAGAAAACCTACTTTTGTATATAGATATCAACGGTAAT	0	FLTENLLLYIDINGN	0	0	0	19	5	30	56	9	86	86	1	92	46	1	109	17	13	8	36	23	51	1	21	1	44	3	77	10	13	44	45	2	106	32	7	42
LTENLLLYIDINGNL	TTAACAGAAAATTTGCTTCTGTATATCGATATTAATGGTAACTTG	0	LTENLLLYIDINGNL	0	0	0	17	5	30	64	11	69	66	7	81	28	5	95	14	26	11	46	32	52	5	26	2	51	8	85	26	9	48	39	4	94	40	11	44
TENLLLYIDINGNLH	ACAGAAAATTTATTATTGTACATCGATATTAATGGCAATCTCCAC	0	TENLLLYIDINGNLH	0	0	0	8	2	11	15	15	29	33	3	20	16	1	23	12	15	3	25	14	44	1	7	0	25	6	54	7	8	30	15	2	55	22	5	36
ENLLLYIDINGNLHP	GAAAATCTTCTGCTTTATATTGATATAAATGGAAATTTACATCCA	0	ENLLLYIDINGNLHP	0	0	0	1	1	12	7	3	47	21	2	55	12	2	55	10	12	4	37	21	39	0	14	0	49	12	63	9	8	21	28	7	47	18	11	32
NLLLYIDINGNLHPD	AACTTATTGCTATATATTGATATCAACGGAAATCTTCATCCCGAT	0	NLLLYIDINGNLHPD	0	0	0	10	0	18	17	0	51	35	0	40	10	1	29	8	9	6	30	13	13	8	13	0	42	3	14	19	7	15	11	1	13	28	6	6
LLLYIDINGNLHPDS	CTATTACTATATATTGATATAAATGGAAACCTACATCCAGACAGT	0	LLLYIDINGNLHPDS	0	0	0	0	0	0	0	0	0	0	0	0	0	0	0	6	18	12	1	0	0	3	7	1	0	0	0	0	0	1	0	0	0	0	1	0
LLYIDINGNLHPDSA	TTGTTGTATATTGACATAAATGGCAATCTACACCCAGATAGTGCC	0	LLYIDINGNLHPDSA	0	0	0	3	0	0	1	0	0	0	0	0	0	0	0	6	12	12	8	0	0	1	3	0	1	0	0	6	0	0	0	0	0	7	0	0
LYIDINGNLHPDSAT	TTATATATAGATATTAACGGAAATCTGCACCCCGACTCCGCCACC	0	LYIDINGNLHPDSAT	0	0	0	0	0	0	0	0	0	0	0	0	0	0	0	0	0	0	0	0	0	0	0	0	0	0	0	0	0	0	0	0	0	0	0	0
YIDINGNLHPDSATL	TATATTGATATTAACGGTAATTTGCACCCTGATTCAGCGACTCTT	0	YIDINGNLHPDSATL	0	0	0	0	0	2	0	0	1	0	0	2	0	0	0	8	8	3	7	1	18	5	8	0	1	0	7	10	1	29	2	0	6	3	0	10
IDINGNLHPDSATLV	ATTGATATTAATGGAAATTTGCATCCAGATTCAGCTACCTTAGTT	0	IDINGNLHPDSATLV	0	0	0	0	0	0	0	0	0	0	0	0	0	0	0	0	5	2	1	5	0	2	1	0	0	0	0	2	4	0	0	0	0	0	0	0
DINGNLHPDSATLVS	GACATAAATGGTAATTTGCATCCTGATTCAGCAACATTGGTGTCC	0	DINGNLHPDSATLVS	0	0	0	0	0	0	0	0	0	0	0	0	0	0	0	3	5	6	3	1	1	0	6	0	0	1	1	8	2	9	0	0	0	0	0	2
INGNLHPDSATLVSD	ATAAACGGTAATCTACATCCTGATTCCGCAACACTAGTCTCTGAC	0	INGNLHPDSATLVSD	0	0	0	1	0	2	7	0	0	1	0	0	0	0	0	14	23	13	23	15	4	1	17	0	11	1	1	17	4	5	3	0	3	12	0	4
NGNLHPDSATLVSDI	AATGGTAATTTGCATCCAGATTCCGCAACACTCGTGTCTGATATC	0	NGNLHPDSATLVSDI	0	0	1	5	0	0	17	0	0	14	0	0	0	1	0	7	16	20	27	17	6	5	17	1	32	1	2	25	5	14	3	0	0	26	0	2
GNLHPDSATLVSDID	GGTAACCTACATCCAGATTCAGCCACCTTAGTCTCCGATATTGAT	0	GNLHPDSATLVSDID	0	0	0	26	8	12	71	13	40	122	16	44	83	9	13	19	15	16	39	9	46	3	14	0	49	1	51	11	5	47	61	0	19	38	3	42
NLHPDSATLVSDIDI	AATTTGCACCCCGATAGTGCAACTCTTGTCTCCGATATCGACATT	0	NLHPDSATLVSDIDI	0	0	0	41	0	16	90	0	78	172	0	51	109	0	97	35	26	26	78	38	51	4	27	3	140	2	75	23	25	37	148	1	114	58	12	49
LHPDSATLVSDIDIT	TTACATCCAGATTCTGCCACTTTGGTGAGTGATATTGATATTACA	0	LHPDSATLVSDIDIT	0	0	0	21	0	24	41	2	98	95	0	64	53	2	115	14	22	15	41	8	54	2	16	2	56	1	93	12	4	36	47	1	127	36	8	69
HPDSATLVSDIDITF	CATCCAGATTCTGCTACACTTGTTTCAGATATAGATATAACTTTT	0	HPDSATLVSDIDITF	0	0	0	19	0	11	59	0	19	76	0	20	45	1	4	23	17	16	46	8	27	1	17	1	66	0	14	11	7	66	77	0	11	27	2	40
PDSATLVSDIDITFL	CCAGATTCCGCTACATTGGTATCTGATATCGACATTACTTTCCTT	0	PDSATLVSDIDITFL	0	0	0	21	1	16	40	0	33	74	2	17	74	1	12	15	20	12	61	7	48	2	19	0	109	0	41	31	8	73	120	1	24	30	2	62
DSATLVSDIDITFLK	GATTCCGCAACTTTGGTTTCGGATATTGATATTACATTTTTAAAA	0	DSATLVSDIDITFLK	0	0	1	9	0	9	29	0	18	52	0	8	30	0	2	17	14	14	24	5	19	0	15	2	38	0	12	7	3	24	23	0	16	16	2	20
SATLVSDIDITFLKK	TCCGCTACACTTGTGAGTGACATAGATATCACATTCCTAAAAAAA	0	SATLVSDIDITFLKK	0	0	0	6	1	4	23	0	29	36	2	16	11	0	4	15	28	14	32	4	23	2	15	0	45	1	5	18	2	25	42	0	2	32	1	8
ATLVSDIDITFLKKD	GCCACATTAGTATCTGATATAGATATTACTTTCCTGAAGAAAGAT	0	ATLVSDIDITFLKKD	0	0	0	2	3	0	10	2	0	8	0	0	0	0	0	18	9	9	24	6	12	6	13	1	11	1	3	9	9	34	7	0	0	15	2	2
TLVSDIDITFLKKDA	ACTCTTGTTTCTGATATTGATATCACATTCCTCAAAAAGGATGCA	0	TLVSDIDITFLKKDA	0	0	0	13	0	2	57	0	2	63	0	1	41	0	0	7	13	11	29	17	12	1	11	1	37	1	8	11	3	40	27	2	1	28	3	7
LVSDIDITFLKKDAP	CTGGTCAGTGATATCGATATAACATTCCTAAAAAAGGATGCACCA	0	LVSDIDITFLKKDAP	0	0	0	3	7	0	1	9	3	2	2	1	0	0	1	7	9	9	9	6	10	7	8	0	4	0	1	10	4	16	1	0	1	4	1	3
VSDIDITFLKKDAPY	GTTAGTGATATTGATATTACTTTTCTTAAAAAAGATGCTCCATAC	0	VSDIDITFLKKDAPY	0	0	1	7	0	1	5	0	0	5	0	0	0	0	0	10	16	3	14	20	7	5	9	0	11	4	0	11	17	13	1	2	0	1	6	2
SDIDITFLKKDAPYI	TCTGATATCGACATTACGTTTTTAAAGAAGGATGCTCCATACATT	0	SDIDITFLKKDAPYI	0	0	0	1	0	0	0	0	0	3	0	0	1	0	0	10	6	4	10	5	5	0	7	0	9	1	1	13	1	10	3	0	0	10	1	0
DIDITFLKKDAPYIV	GATATCGACATTACGTTTTTAAAAAAGGACGCCCCATACATTGTT	0	DIDITFLKKDAPYIV	0	0	0	0	1	4	0	3	0	0	0	1	0	0	1	11	18	6	7	9	14	10	27	2	0	1	3	11	12	17	1	1	1	3	3	8
IDITFLKKDAPYIVG	ATCGATATTACCTTTTTGAAAAAAGACGCACCATATATAGTTGGA	0	IDITFLKKDAPYIVG	0	0	0	0	0	0	0	0	0	0	0	0	0	0	0	24	20	15	12	6	10	12	27	2	3	1	1	9	3	18	0	0	0	2	2	6
DITFLKKDAPYIVGD	GATATCACCTTTTTAAAGAAGGATGCGCCCTACATAGTTGGAGAC	0	DITFLKKDAPYIVGD	0	0	0	0	0	2	1	0	5	0	0	0	0	0	0	9	8	4	17	8	13	3	12	4	0	2	3	8	3	26	0	1	1	2	0	8
ITFLKKDAPYIVGDV	ATTACCTTTCTAAAGAAAGATGCGCCATACATCGTTGGAGATGTC	0	ITFLKKDAPYIVGDV	0	0	0	0	0	0	0	0	0	0	0	0	0	0	0	14	12	11	3	0	4	4	6	0	0	0	0	2	0	7	0	0	0	0	0	0
TFLKKDAPYIVGDVV	ACATTTTTGAAGAAGGATGCACCGTACATCGTTGGTGATGTTGTT	0	TFLKKDAPYIVGDVV	0	0	0	7	0	0	18	0	1	33	0	0	20	0	0	1	4	3	4	1	12	0	3	0	16	0	25	3	0	10	17	0	35	5	1	17
FLKKDAPYIVGDVVQ	TTTTTGAAAAAAGACGCCCCATACATTGTTGGGGACGTAGTACAA	0	FLKKDAPYIVGDVVQ	0	0	1	21	4	18	51	21	89	105	23	94	81	16	96	15	21	10	50	30	68	0	9	0	104	14	110	18	14	26	77	22	93	31	27	39
LKKDAPYIVGDVVQE	CTGAAAAAAGACGCCCCGTACATCGTTGGCGACGTAGTTCAGGAA	0	LKKDAPYIVGDVVQE	0	0	0	26	1	15	83	5	72	137	3	53	111	3	64	20	28	18	61	27	58	3	22	0	85	14	72	16	12	51	92	17	86	61	12	48
KKDAPYIVGDVVQEG	AAGAAAGATGCCCCTTACATCGTGGGTGACGTCGTACAAGAGGGG	0	KKDAPYIVGDVVQEG	0	0	0	19	14	6	46	24	24	76	20	17	86	7	26	22	31	27	69	26	69	4	22	1	113	11	106	30	20	58	120	9	115	45	16	54
KDAPYIVGDVVQEGV	AAGGATGCTCCTTACATAGTCGGAGATGTCGTTCAAGAAGGGGTC	0	KDAPYIVGDVVQEGV	1	0	0	14	27	13	39	34	61	59	49	90	62	34	163	10	9	19	29	48	52	0	12	1	67	36	84	8	12	23	87	42	124	13	14	21
DAPYIVGDVVQEGVL	GATGCACCTTATATTGTTGGTGATGTTGTCCAAGAGGGTGTATTG	0	DAPYIVGDVVQEGVL	1	0	0	13	18	35	41	50	80	89	61	95	90	64	181	10	9	19	45	52	86	3	14	0	59	42	126	8	15	29	99	32	199	22	18	36
APYIVGDVVQEGVLT	GCACCTTATATAGTGGGAGACGTTGTTCAGGAGGGAGTATTGACC	0	APYIVGDVVQEGVLT	0	0	0	12	9	7	21	15	18	31	14	18	32	13	42	4	12	9	22	29	53	1	5	0	49	30	81	5	13	26	37	44	97	8	16	19
PYIVGDVVQEGVLTA	CCATATATTGTCGGCGATGTTGTCCAGGAAGGTGTACTAACGGCT	0	PYIVGDVVQEGVLTA	0	0	1	27	2	46	80	8	119	104	7	128	82	5	222	25	23	26	78	42	105	2	20	2	117	25	156	23	17	66	106	25	242	56	25	66
YIVGDVVQEGVLTAV	TACATTGTTGGGGACGTGGTTCAAGAAGGCGTTTTGACAGCTGTT	0	YIVGDVVQEGVLTAV	0	0	0	31	62	44	103	179	202	152	276	239	209	334	486	23	36	32	81	111	126	1	18	0	118	115	223	16	41	55	201	158	358	54	92	66
IVGDVVQEGVLTAVV	ATTGTTGGAGATGTTGTGCAAGAAGGTGTACTCACAGCTGTCGTA	0	IVGDVVQEGVLTAVV	0	0	1	39	22	49	84	58	145	141	76	152	138	74	234	28	36	40	71	103	135	1	18	0	142	77	222	24	35	69	168	100	268	55	53	52
VGDVVQEGVLTAVVI	GTGGGGGACGTTGTTCAAGAAGGAGTACTGACAGCTGTCGTGATA	0	VGDVVQEGVLTAVVI	0	0	0	26	23	41	84	44	133	140	55	126	123	49	228	15	26	30	57	75	128	3	15	1	89	35	170	8	23	42	101	49	275	35	24	43
GDVVQEGVLTAVVIP	GGGGATGTGGTGCAGGAAGGTGTTTTGACCGCAGTTGTTATTCCA	0	GDVVQEGVLTAVVIP	1	0	0	28	42	22	104	75	71	188	108	100	185	130	149	24	23	20	84	121	145	5	11	1	114	86	191	13	37	67	154	151	260	52	67	57
DVVQEGVLTAVVIPT	GACGTAGTCCAAGAAGGAGTGCTGACCGCTGTTGTTATTCCGACA	0	DVVQEGVLTAVVIPT	0	1	0	22	7	34	91	32	84	171	26	112	171	46	190	30	26	18	69	63	118	7	21	2	104	49	207	9	22	56	139	69	251	32	33	50
VVQEGVLTAVVIPTK	GTGGTTCAAGAAGGAGTGTTGACAGCTGTAGTTATTCCGACTAAA	0	VVQEGVLTAVVIPTK	0	0	0	27	4	11	69	14	41	100	14	42	60	2	55	6	8	10	28	28	38	0	7	1	48	17	48	17	16	44	40	12	56	33	14	25
VQEGVLTAVVIPTKK	GTACAGGAAGGTGTCTTGACAGCTGTTGTAATCCCAACGAAAAAG	0	VQEGVLTAVVIPTKK	0	0	0	0	5	7	1	23	22	0	21	13	0	12	4	24	38	19	14	59	40	14	32	1	9	14	13	21	42	70	2	6	9	2	18	33
QEGVLTAVVIPTKKA	CAGGAAGGTGTCCTTACCGCCGTTGTTATACCTACTAAAAAGGCA	0	QEGVLTAVVIPTKKA	0	0	0	1	0	1	3	0	4	2	0	3	1	0	1	18	8	7	2	13	14	0	5	0	0	6	9	6	18	10	0	1	5	1	8	8
EGVLTAVVIPTKKAG	GAAGGTGTTTTGACAGCAGTTGTTATACCAACCAAGAAAGCAGGT	0	EGVLTAVVIPTKKAG	0	0	0	0	7	2	2	8	20	0	5	6	0	2	7	27	28	22	5	27	14	12	13	0	2	6	9	5	12	36	2	0	1	3	9	7
GVLTAVVIPTKKAGG	GGTGTATTGACGGCTGTGGTCATACCAACCAAAAAAGCAGGTGGT	0	GVLTAVVIPTKKAGG	0	0	0	2	3	8	0	2	6	2	0	5	0	0	0	15	13	29	13	27	24	10	23	0	1	4	11	17	20	46	2	1	3	3	4	15
VLTAVVIPTKKAGGT	GTATTGACCGCTGTTGTGATTCCTACTAAAAAGGCAGGTGGTACA	0	VLTAVVIPTKKAGGT	0	0	0	0	0	1	0	0	0	0	0	0	0	0	0	16	22	13	6	3	0	8	8	1	0	2	0	0	2	0	1	3	0	1	0	0
LTAVVIPTKKAGGTT	TTAACCGCTGTTGTAATCCCAACCAAGAAAGCAGGTGGAACGACA	0	LTAVVIPTKKAGGTT	0	0	0	0	0	0	0	0	0	0	0	0	0	0	1	25	27	21	2	6	3	24	20	0	0	0	0	2	4	2	1	0	0	0	0	0
TAVVIPTKKAGGTTE	ACCGCTGTTGTTATACCGACCAAAAAAGCTGGTGGTACTACAGAA	0	TAVVIPTKKAGGTTE	0	0	0	0	0	1	0	0	7	0	0	7	0	0	1	8	13	6	3	9	3	7	17	1	0	2	0	6	6	6	0	0	0	0	0	2
AVVIPTKKAGGTTEM	GCGGTTGTGATTCCAACTAAGAAAGCTGGGGGCACCACTGAAATG	0	AVVIPTKKAGGTTEM	0	0	0	0	0	0	0	0	0	0	0	0	0	0	0	5	4	3	0	0	1	2	5	0	0	0	1	1	1	4	0	0	0	0	0	1
VVIPTKKAGGTTEML	GTCGTTATTCCGACAAAAAAGGCAGGAGGTACTACAGAGATGCTG	0	VVIPTKKAGGTTEML	0	0	0	1	0	0	1	0	0	0	0	0	0	0	0	23	31	22	15	5	4	12	25	0	1	0	2	8	4	18	1	0	0	3	0	2
VIPTKKAGGTTEMLA	GTAATCCCTACTAAGAAGGCTGGTGGTACTACTGAGATGTTAGCC	0	VIPTKKAGGTTEMLA	0	1	0	5	0	0	5	0	0	6	0	0	0	0	0	10	6	7	0	0	0	6	8	0	2	0	0	3	1	0	1	0	0	0	1	0
IPTKKAGGTTEMLAK	ATTCCTACTAAAAAAGCAGGTGGCACGACGGAAATGTTAGCTAAA	0	IPTKKAGGTTEMLAK	0	0	0	1	2	0	0	1	0	0	0	0	0	1	0	22	25	21	2	12	0	18	20	0	2	1	3	7	11	1	0	0	1	0	3	2
PTKKAGGTTEMLAKA	CCAACAAAGAAGGCTGGCGGTACAACCGAAATGTTAGCCAAGGCC	0	PTKKAGGTTEMLAKA	0	0	0	0	0	2	0	0	0	0	0	0	0	1	0	12	10	10	1	5	2	3	4	1	0	1	0	1	4	4	0	0	0	0	1	0
TKKAGGTTEMLAKAL	ACGAAGAAGGCAGGTGGCACTACTGAAATGTTAGCTAAGGCACTG	0	TKKAGGTTEMLAKAL	0	0	0	2	7	0	3	8	0	7	0	0	6	0	0	12	24	13	10	22	9	8	17	0	2	2	3	9	11	30	6	1	3	1	1	9
KKAGGTTEMLAKALR	AAAAAAGCTGGAGGCACTACCGAAATGCTCGCCAAAGCCTTGAGG	0	KKAGGTTEMLAKALR	0	0	0	0	0	0	0	0	0	0	0	0	0	0	0	6	6	6	2	30	0	3	5	0	1	11	0	0	10	0	0	0	0	2	8	0
KAGGTTEMLAKALRK	AAAGCAGGTGGAACTACTGAGATGCTAGCTAAAGCTTTACGGAAA	0	KAGGTTEMLAKALRK	0	0	0	1	12	1	0	39	11	0	38	10	1	21	5	25	26	23	11	62	7	5	21	0	5	39	6	15	40	23	1	24	3	0	42	12
AGGTTEMLAKALRKV	GCGGGGGGTACTACAGAAATGCTAGCTAAGGCCTTACGTAAAGTG	0	AGGTTEMLAKALRKV	0	1	0	0	2	1	0	0	0	0	0	3	0	0	1	31	51	38	12	57	7	13	39	1	3	12	9	9	44	18	0	2	2	1	8	1
GGTTEMLAKALRKVP	GGTGGAACTACAGAGATGTTGGCCAAAGCATTGCGCAAGGTCCCT	0	GGTTEMLAKALRKVP	0	0	0	1	5	2	1	9	10	0	11	10	0	7	3	17	18	21	7	46	8	12	12	1	0	4	3	5	18	18	0	4	0	0	14	3
GTTEMLAKALRKVPT	GGCACAACTGAAATGTTAGCTAAGGCTCTACGAAAAGTCCCTACT	0	GTTEMLAKALRKVPT	0	0	0	7	58	41	19	119	97	10	138	90	1	113	40	20	31	16	29	104	62	11	29	2	8	74	40	26	41	67	3	69	32	24	71	67
TTEMLAKALRKVPTD	ACCACAGAGATGCTCGCGAAGGCCTTGAGGAAGGTACCAACAGAT	0	TTEMLAKALRKVPTD	1	0	0	3	6	2	0	0	1	0	1	1	0	2	1	14	22	22	2	1	4	15	13	0	0	2	2	3	0	5	2	0	2	2	0	2
TEMLAKALRKVPTDN	ACAGAAATGCTAGCCAAAGCATTGCGTAAAGTCCCTACAGATAAC	0	TEMLAKALRKVPTDN	0	0	0	2	3	0	4	7	0	3	5	2	0	2	0	15	22	12	3	2	3	6	11	0	2	1	1	2	5	9	1	0	0	0	0	0
EMLAKALRKVPTDNY	GAAATGTTAGCCAAGGCCCTGAGAAAAGTCCCTACCGACAATTAC	0	EMLAKALRKVPTDNY	0	0	0	0	14	0	0	22	0	0	9	0	0	9	0	12	21	14	10	27	18	3	20	0	14	7	3	9	37	18	2	5	1	7	21	3
MLAKALRKVPTDNYI	ATGTTAGCAAAAGCTTTGAGAAAGGTTCCGACTGATAATTACATT	0	MLAKALRKVPTDNYI	0	0	0	0	0	0	2	0	0	2	0	0	1	0	0	13	17	14	2	3	6	17	11	1	1	1	1	1	0	17	0	0	1	3	1	1
LAKALRKVPTDNYIT	TTGGCTAAGGCCTTAAGAAAGGTGCCTACTGATAATTACATTACC	0	LAKALRKVPTDNYIT	0	0	0	0	1	3	0	3	3	0	1	2	0	0	2	12	8	2	0	0	0	2	3	0	0	4	0	0	2	0	0	3	0	0	2	0
AKALRKVPTDNYITT	GCAAAAGCCCTGAGAAAAGTCCCAACAGATAATTACATTACGACA	0	AKALRKVPTDNYITT	0	0	0	1	0	3	0	0	4	0	0	3	0	0	0	16	17	9	12	6	2	9	6	0	1	0	1	15	4	10	0	0	0	0	2	0
KALRKVPTDNYITTY	AAAGCTCTACGTAAAGTGCCTACTGATAATTATATAACTACCTAC	0	KALRKVPTDNYITTY	0	0	0	0	0	17	3	1	35	2	2	19	0	0	3	17	19	8	21	21	22	6	14	0	15	2	10	27	12	41	1	1	5	10	0	25
ALRKVPTDNYITTYP	GCCCTTCGAAAAGTACCGACCGATAATTACATAACGACTTATCCA	0	ALRKVPTDNYITTYP	0	0	0	3	0	4	9	0	8	2	0	3	0	0	0	17	8	10	19	13	14	9	18	1	9	3	6	23	12	24	1	0	1	15	4	8
LRKVPTDNYITTYPG	TTAAGAAAAGTGCCAACGGATAATTACATAACGACCTACCCAGGC	0	LRKVPTDNYITTYPG	0	0	0	0	1	4	0	0	9	0	0	5	0	0	2	6	4	5	5	17	4	2	2	0	1	5	3	4	15	12	2	3	0	0	6	4
RKVPTDNYITTYPGQ	AGAAAAGTCCCGACAGACAACTATATCACAACATATCCGGGACAA	0	RKVPTDNYITTYPGQ	0	0	0	1	19	7	2	31	36	0	32	27	0	37	36	11	11	17	11	25	23	6	6	0	7	17	31	13	12	13	1	12	27	4	12	37
KVPTDNYITTYPGQG	AAAGTACCAACAGACAACTACATTACCACATATCCAGGACAAGGT	0	KVPTDNYITTYPGQG	0	0	0	0	23	22	1	43	57	0	25	53	1	14	21	20	29	23	10	53	49	8	15	0	3	21	52	10	32	66	1	7	26	5	25	57
VPTDNYITTYPGQGL	GTACCGACAGACAATTACATTACGACTTACCCGGGACAGGGTTTA	0	VPTDNYITTYPGQGL	0	0	0	1	3	0	0	5	0	0	2	0	0	1	0	9	22	9	14	20	19	6	8	0	5	4	9	12	13	29	1	2	2	3	7	9
PTDNYITTYPGQGLN	CCTACTGATAATTACATAACTACATATCCAGGTCAGGGTCTAAAT	0	PTDNYITTYPGQGLN	0	0	0	0	3	1	0	6	1	0	5	0	0	2	0	19	18	15	16	17	14	4	15	0	2	5	2	15	13	14	0	3	1	4	8	5
TDNYITTYPGQGLNG	ACCGACAACTATATCACGACTTACCCTGGTCAAGGTTTAAATGGA	0	TDNYITTYPGQGLNG	0	0	0	5	18	5	10	28	23	4	22	14	0	3	3	16	14	20	14	27	27	6	15	0	2	6	13	7	20	41	0	8	4	3	6	17
DNYITTYPGQGLNGY	GACAATTATATAACAACATACCCTGGCCAAGGATTGAATGGATAT	0	DNYITTYPGQGLNGY	0	0	0	2	15	4	1	42	8	1	24	9	0	12	3	16	15	10	17	50	41	6	22	1	3	18	15	9	30	71	1	18	7	8	20	47
NYITTYPGQGLNGYT	AATTATATTACAACATACCCAGGACAGGGGTTAAACGGTTACACC	0	NYITTYPGQGLNGYT	0	0	0	0	0	0	0	0	0	0	0	0	0	0	0	2	2	1	1	4	0	1	4	0	0	0	0	1	0	0	0	0	0	0	0	0
YITTYPGQGLNGYTV	TATATTACAACTTACCCCGGGCAAGGTCTTAATGGTTATACTGTA	0	YITTYPGQGLNGYTV	0	0	0	3	2	13	0	1	11	0	1	6	1	0	0	12	14	10	12	17	22	6	14	1	3	4	10	13	3	44	0	2	0	6	4	12
ITTYPGQGLNGYTVE	ATCACAACGTACCCAGGGCAAGGATTGAATGGTTATACAGTTGAA	0	ITTYPGQGLNGYTVE	2	0	0	3	2	19	2	1	15	1	0	6	0	0	2	21	31	16	14	22	37	11	21	2	2	3	10	16	11	69	1	1	6	3	1	17
TTYPGQGLNGYTVEE	ACTACGTACCCAGGTCAAGGATTAAACGGATATACAGTGGAAGAG	0	TTYPGQGLNGYTVEE	0	0	0	0	0	6	0	0	4	0	0	2	0	0	1	16	19	23	13	9	18	4	12	0	1	0	3	27	3	40	2	0	0	1	0	2
TYPGQGLNGYTVEEA	ACGTATCCAGGCCAGGGTTTGAACGGATATACAGTCGAAGAAGCC	0	TYPGQGLNGYTVEEA	0	0	0	3	0	1	0	0	1	2	0	0	0	0	0	3	7	6	9	6	13	1	7	0	3	1	10	7	4	36	1	0	1	3	1	11
YPGQGLNGYTVEEAK	TATCCAGGTCAAGGCCTCAATGGTTACACAGTGGAAGAGGCGAAA	0	YPGQGLNGYTVEEAK	0	0	0	8	12	13	23	11	18	11	6	24	9	1	2	23	22	17	29	41	63	3	12	2	51	17	32	17	26	85	22	9	12	53	27	55
PGQGLNGYTVEEAKT	CCAGGTCAAGGATTGAACGGTTACACCGTTGAAGAAGCTAAAACA	0	PGQGLNGYTVEEAKT	0	0	0	0	2	14	0	1	45	0	7	27	0	1	8	11	15	6	13	14	33	5	10	0	27	8	17	15	14	37	8	8	7	23	7	19
GQGLNGYTVEEAKTV	GGTCAAGGTTTAAACGGCTATACAGTTGAAGAAGCCAAAACTGTA	0	GQGLNGYTVEEAKTV	0	0	0	9	20	10	31	21	25	25	27	49	3	20	24	16	23	10	37	58	21	3	9	0	12	51	29	16	25	27	6	36	20	26	35	27
QGLNGYTVEEAKTVL	CAGGGTCTTAACGGCTATACAGTTGAGGAAGCCAAGACTGTTCTT	0	QGLNGYTVEEAKTVL	0	0	0	0	4	15	1	5	59	1	17	56	0	9	53	14	12	7	17	28	50	1	9	0	14	18	62	9	10	37	5	18	58	18	19	53
GLNGYTVEEAKTVLK	GGACTAAATGGTTATACTGTAGAGGAGGCTAAAACAGTTCTTAAG	0	GLNGYTVEEAKTVLK	0	0	0	2	7	15	10	12	29	1	5	23	1	2	1	17	22	19	29	40	48	11	19	2	9	15	29	18	20	77	0	10	6	21	16	45
LNGYTVEEAKTVLKK	TTAAACGGATACACTGTGGAGGAAGCTAAGACTGTCTTAAAAAAA	0	LNGYTVEEAKTVLKK	0	0	0	0	7	3	0	8	1	0	5	2	0	2	0	4	14	3	6	9	8	2	1	0	1	6	3	6	9	11	1	0	3	8	5	8
NGYTVEEAKTVLKKC	AATGGATATACTGTCGAAGAAGCAAAGACAGTTCTAAAGAAATGT	0	NGYTVEEAKTVLKKC	0	0	1	2	15	35	10	16	75	4	18	43	0	9	18	27	24	26	17	56	19	14	21	0	6	25	7	19	23	28	2	13	4	6	30	13
GYTVEEAKTVLKKCK	GGTTATACCGTGGAAGAAGCCAAGACCGTCCTAAAAAAATGCAAA	0	GYTVEEAKTVLKKCK	0	0	0	0	6	2	0	9	1	0	7	0	0	4	1	26	26	12	11	34	2	14	22	0	2	11	1	10	8	2	0	7	0	3	14	2
YTVEEAKTVLKKCKS	TATACCGTTGAAGAAGCCAAAACCGTACTGAAGAAGTGCAAGTCG	0	YTVEEAKTVLKKCKS	0	1	0	0	0	4	0	0	5	0	0	3	1	0	0	6	11	12	8	6	1	3	12	0	1	2	0	7	1	2	0	0	0	0	5	0
TVEEAKTVLKKCKSA	ACTGTCGAGGAGGCTAAAACGGTACTTAAGAAATGCAAGAGCGCT	0	TVEEAKTVLKKCKSA	0	0	0	1	0	0	1	0	0	1	0	0	0	0	0	15	24	14	7	6	0	15	24	0	5	1	0	4	6	0	2	0	0	1	1	0
VEEAKTVLKKCKSAF	GTCGAAGAGGCAAAAACTGTTTTGAAGAAATGTAAGTCTGCCTTT	0	VEEAKTVLKKCKSAF	0	0	0	0	2	5	0	0	5	0	0	3	0	0	0	17	31	19	4	1	0	6	23	0	1	0	0	2	0	0	0	0	0	0	1	0
EEAKTVLKKCKSAFY	GAGGAAGCGAAAACGGTACTAAAAAAGTGTAAGAGCGCTTTTTAT	0	EEAKTVLKKCKSAFY	0	0	0	3	9	11	1	15	16	4	8	7	0	10	0	18	17	18	5	32	10	5	28	0	5	9	1	11	17	22	0	5	0	3	10	12
EAKTVLKKCKSAFYI	GAAGCAAAGACCGTGTTGAAAAAGTGCAAATCAGCGTTTTATATA	0	EAKTVLKKCKSAFYI	0	0	0	0	1	2	0	0	0	0	0	1	0	0	0	23	22	17	0	2	3	17	22	1	0	1	2	1	0	2	0	2	3	2	0	4
AKTVLKKCKSAFYIL	GCTAAAACAGTTTTGAAGAAGTGTAAGAGTGCCTTTTATATTTTA	0	AKTVLKKCKSAFYIL	0	0	0	0	0	0	0	1	0	0	0	0	0	1	0	17	12	11	1	2	0	6	11	3	0	0	0	0	0	0	0	0	0	0	0	0
KTVLKKCKSAFYILP	AAGACAGTATTGAAGAAATGTAAGTCTGCCTTCTACATATTACCC	0	KTVLKKCKSAFYILP	0	0	0	1	0	0	3	0	0	3	0	0	0	0	0	4	8	8	4	2	0	4	11	1	1	0	0	2	1	0	0	0	0	0	2	0
TVLKKCKSAFYILPS	ACTGTTTTAAAAAAGTGCAAGTCTGCGTTTTATATCTTACCGTCT	0	TVLKKCKSAFYILPS	0	0	0	1	0	5	6	0	10	8	0	9	1	0	2	15	19	10	17	10	14	8	19	2	9	0	5	12	4	21	2	1	0	4	0	3
VLKKCKSAFYILPSI	GTATTAAAGAAATGTAAATCTGCGTTTTATATACTTCCATCGATA	0	VLKKCKSAFYILPSI	0	0	0	0	0	0	0	0	0	0	0	0	0	0	0	14	12	15	3	1	0	11	18	1	0	0	0	0	1	0	3	1	0	1	0	0
LKKCKSAFYILPSII	CTAAAAAAGTGTAAGTCAGCTTTCTACATCTTGCCCAGTATAATT	0	LKKCKSAFYILPSII	0	0	0	0	0	3	0	0	2	0	0	1	0	0	0	10	27	9	2	1	2	12	14	1	3	0	0	1	0	8	0	0	0	2	0	0
KKCKSAFYILPSIIS	AAAAAATGTAAAAGTGCTTTCTATATTCTACCATCCATTATATCA	0	KKCKSAFYILPSIIS	0	0	1	12	15	10	38	43	48	53	34	43	25	12	62	10	15	16	27	41	64	3	16	3	52	36	103	16	11	41	37	29	136	29	29	71
KCKSAFYILPSIISN	AAGTGTAAAAGCGCCTTTTATATTTTGCCTTCGATCATATCAAAT	0	KCKSAFYILPSIISN	0	0	0	15	15	28	54	66	103	40	58	81	16	16	73	20	22	18	51	50	81	7	19	0	42	30	78	34	19	72	24	24	78	36	34	71
CKSAFYILPSIISNE	TGCAAATCGGCTTTCTATATATTACCGAGCATCATATCTAACGAA	0	CKSAFYILPSIISNE	0	0	0	8	31	22	23	94	40	31	139	60	13	134	63	21	16	21	44	55	66	3	12	3	61	60	81	25	16	33	37	50	90	42	46	29
KSAFYILPSIISNEK	AAATCAGCATTCTACATACTCCCTTCGATTATTTCAAACGAAAAA	0	KSAFYILPSIISNEK	1	0	0	21	58	51	59	144	102	91	255	80	81	293	123	17	25	22	54	140	69	1	9	0	82	156	139	13	28	23	89	230	121	46	98	27
SAFYILPSIISNEKQ	AGCGCGTTTTACATTCTTCCATCTATCATCAGTAATGAAAAACAA	0	SAFYILPSIISNEKQ	0	0	0	4	24	18	10	24	45	12	11	22	6	6	26	13	21	12	37	35	22	4	10	0	34	10	18	9	12	10	24	4	13	21	6	10
AFYILPSIISNEKQE	GCGTTTTATATATTGCCCTCAATTATTTCTAACGAAAAGCAAGAA	0	AFYILPSIISNEKQE	0	0	0	3	0	0	2	0	0	2	0	0	0	0	0	25	15	10	2	2	1	11	9	0	0	1	1	0	0	0	0	1	1	0	1	0
FYILPSIISNEKQEI	TTCTACATTTTACCCTCCATTATTTCGAATGAGAAACAGGAGATT	0	FYILPSIISNEKQEI	0	0	0	1	1	2	0	0	3	0	0	0	0	0	0	21	25	12	0	1	5	6	10	1	0	0	0	2	0	6	0	0	0	0	0	0
YILPSIISNEKQEIL	TATATATTACCTAGTATTATCTCTAACGAAAAACAAGAAATTTTA	0	YILPSIISNEKQEIL	0	0	0	0	2	6	0	2	2	0	0	2	0	0	0	12	17	8	6	10	6	5	14	0	3	2	1	11	5	6	2	0	0	1	2	6
ILPSIISNEKQEILG	ATCTTACCATCTATAATTTCAAATGAAAAGCAAGAAATACTTGGT	0	ILPSIISNEKQEILG	0	0	0	0	0	0	0	0	0	0	0	0	0	0	0	13	21	17	4	1	8	12	16	1	0	0	2	14	2	18	0	0	0	1	0	6
LPSIISNEKQEILGT	TTACCGAGCATTATCTCAAACGAAAAACAAGAAATACTAGGCACT	0	LPSIISNEKQEILGT	0	0	0	0	0	3	0	0	1	0	0	1	0	0	0	8	8	6	4	7	7	4	6	0	0	6	10	7	4	20	0	5	2	0	1	5
PSIISNEKQEILGTV	CCTTCAATAATTTCAAATGAAAAACAGGAAATTTTGGGCACAGTT	0	PSIISNEKQEILGTV	0	0	0	0	0	0	0	0	0	0	0	0	0	0	0	13	19	12	6	11	8	12	14	0	2	1	2	8	3	18	0	0	0	1	0	2
SIISNEKQEILGTVS	AGTATTATCTCTAATGAGAAACAAGAGATCCTTGGCACTGTTTCT	0	SIISNEKQEILGTVS	0	0	0	24	35	28	55	80	100	114	135	111	74	85	158	20	20	11	55	114	124	6	21	0	90	95	169	12	28	43	77	97	229	39	61	74
IISNEKQEILGTVSW	ATTATCTCTAATGAAAAACAAGAGATCCTCGGCACAGTGTCATGG	0	IISNEKQEILGTVSW	0	0	1	11	23	22	20	58	57	40	98	81	19	49	64	17	20	5	45	56	53	1	8	1	77	62	83	13	27	33	41	40	117	41	41	51
ISNEKQEILGTVSWN	ATTTCGAATGAAAAACAGGAGATCCTTGGGACTGTGTCCTGGAAT	0	ISNEKQEILGTVSWN	0	0	0	5	20	23	33	65	92	52	91	108	17	57	105	23	27	18	37	90	161	4	24	0	58	68	239	36	38	80	36	98	257	51	51	150
SNEKQEILGTVSWNL	TCAAATGAAAAACAAGAAATTCTGGGAACTGTTAGCTGGAACCTA	0	SNEKQEILGTVSWNL	0	0	1	3	39	10	1	86	44	3	114	41	2	96	42	16	8	13	34	55	71	3	16	0	20	49	86	16	12	44	3	85	83	37	50	62
NEKQEILGTVSWNLR	AACGAAAAACAAGAAATTCTTGGGACTGTCTCCTGGAATTTGAGA	0	NEKQEILGTVSWNLR	2	0	0	13	63	50	45	199	145	38	334	176	13	380	191	30	25	13	48	253	120	2	16	0	63	283	180	15	23	60	54	523	251	55	108	92
EKQEILGTVSWNLRE	GAAAAACAAGAAATTTTGGGTACGGTCAGCTGGAACTTAAGAGAA	0	EKQEILGTVSWNLRE	0	0	0	11	40	17	36	111	30	38	191	73	10	183	71	15	20	13	41	121	73	4	13	1	58	109	148	24	14	43	31	188	171	51	60	79
KQEILGTVSWNLREM	AAGCAAGAGATTTTGGGTACTGTCTCATGGAATTTAAGGGAAATG	0	KQEILGTVSWNLREM	0	0	0	22	82	27	80	160	106	81	225	122	18	202	141	25	38	31	60	161	88	5	12	2	65	169	179	35	43	72	30	200	227	69	100	106
QEILGTVSWNLREML	CAAGAGATTCTTGGAACAGTGAGCTGGAACCTTAGGGAAATGCTC	0	QEILGTVSWNLREML	0	0	0	2	56	28	25	181	111	19	313	185	3	359	95	3	11	13	19	89	63	2	5	0	18	117	59	25	19	30	14	194	70	27	36	41
EILGTVSWNLREMLA	GAAATATTGGGTACCGTTTCGTGGAATCTCAGAGAAATGCTAGCT	0	EILGTVSWNLREMLA	2	1	0	2	37	17	4	98	75	3	184	67	1	208	48	22	24	23	33	125	98	6	10	2	27	159	117	42	26	75	4	230	110	20	81	95
ILGTVSWNLREMLAH	ATTTTGGGAACCGTTTCATGGAACTTAAGAGAGATGCTGGCGCAT	0	ILGTVSWNLREMLAH	0	0	0	0	2	3	0	0	2	0	0	0	0	0	0	29	27	22	2	7	3	10	24	1	0	0	0	3	4	6	0	0	0	0	1	0
LGTVSWNLREMLAHA	TTAGGCACTGTTTCTTGGAATTTAAGAGAAATGCTTGCTCACGCT	0	LGTVSWNLREMLAHA	0	0	0	0	25	1	0	13	0	0	9	0	0	0	0	13	19	14	4	29	0	11	19	0	0	2	0	2	14	0	0	5	0	1	5	0
GTVSWNLREMLAHAE	GGCACCGTCTCTTGGAACCTAAGGGAGATGCTGGCCCATGCTGAA	0	GTVSWNLREMLAHAE	0	0	0	0	34	8	1	28	5	0	13	4	0	4	1	19	48	26	22	79	2	18	17	0	5	13	0	29	60	1	2	5	0	5	20	1
TVSWNLREMLAHAEE	ACTGTTTCTTGGAATCTGAGGGAAATGTTGGCTCATGCTGAAGAG	0	TVSWNLREMLAHAEE	0	0	0	0	17	5	0	42	18	1	28	7	2	8	1	23	35	26	24	62	11	10	20	0	6	17	4	24	23	23	0	15	3	4	22	4
VSWNLREMLAHAEET	GTCAGCTGGAACTTACGCGAAATGTTAGCACATGCCGAAGAAACC	0	VSWNLREMLAHAEET	0	0	0	0	1	0	0	3	0	0	0	0	0	0	0	7	3	6	0	4	0	1	11	1	0	0	0	0	5	0	0	0	0	0	1	0
SWNLREMLAHAEETR	TCGTGGAACTTAAGAGAAATGTTGGCCCATGCAGAAGAAACAAGA	0	SWNLREMLAHAEETR	0	0	0	2	25	0	5	45	0	9	14	0	2	6	0	19	23	16	18	60	20	11	20	1	6	26	19	15	35	47	0	21	5	2	27	18
WNLREMLAHAEETRK	TGGAATCTGAGAGAAATGCTAGCTCATGCAGAAGAAACAAGAAAG	0	WNLREMLAHAEETRK	1	1	0	5	9	0	2	1	0	1	0	0	1	0	0	25	24	28	1	4	2	10	34	3	4	0	0	6	4	7	1	0	0	1	1	0
NLREMLAHAEETRKL	AATCTCAGAGAAATGTTGGCGCATGCTGAAGAAACACGAAAATTG	0	NLREMLAHAEETRKL	1	0	0	1	13	2	0	15	7	2	5	1	1	1	0	22	31	28	5	15	4	14	29	2	4	8	4	2	16	8	4	2	0	5	3	1
LREMLAHAEETRKLM	TTGAGGGAAATGTTAGCTCATGCTGAGGAAACAAGAAAATTAATG	0	LREMLAHAEETRKLM	0	0	0	0	0	0	0	0	4	0	0	2	0	1	4	14	22	15	2	0	0	19	18	1	2	2	1	2	3	0	1	2	0	1	1	0
REMLAHAEETRKLMP	AGAGAAATGTTGGCACACGCCGAGGAAACAAGAAAATTGATGCCT	0	REMLAHAEETRKLMP	0	0	0	0	0	0	0	0	0	0	0	0	0	0	0	22	14	17	9	19	5	15	15	2	5	2	2	7	12	8	2	0	2	2	0	5
EMLAHAEETRKLMPV	GAAATGCTGGCCCATGCAGAGGAGACACGCAAGTTGATGCCTGTA	0	EMLAHAEETRKLMPV	0	0	0	0	0	0	0	0	0	0	0	0	0	0	0	11	15	12	4	12	7	3	9	0	2	0	1	4	3	27	0	0	0	2	0	4
MLAHAEETRKLMPVC	ATGCTAGCACATGCAGAAGAAACTAGGAAATTGATGCCCGTATGT	0	MLAHAEETRKLMPVC	0	0	0	3	0	8	8	0	15	3	0	9	0	0	7	18	19	17	12	14	35	7	15	0	3	1	16	8	16	49	1	1	5	8	2	17
LAHAEETRKLMPVCV	TTGGCTCATGCTGAAGAGACTCGCAAGTTGATGCCTGTATGCGTT	0	LAHAEETRKLMPVCV	0	0	1	14	21	34	26	29	190	21	16	174	1	10	164	27	36	35	35	67	98	9	20	0	34	29	122	37	36	81	15	18	101	22	24	91
AHAEETRKLMPVCVE	GCACATGCAGAAGAAACCAGAAAGTTAATGCCTGTTTGTGTGGAA	0	AHAEETRKLMPVCVE	0	1	1	9	15	33	46	28	92	50	25	90	28	19	109	17	25	28	58	31	71	1	16	1	72	24	113	27	13	66	50	28	105	54	18	59
HAEETRKLMPVCVET	CACGCTGAAGAAACCAGGAAACTAATGCCAGTTTGTGTAGAAACG	0	HAEETRKLMPVCVET	0	0	0	10	2	2	23	5	33	20	6	22	7	2	29	19	17	15	28	28	53	6	19	2	33	14	69	30	15	47	12	9	42	33	10	33
AEETRKLMPVCVETK	GCAGAAGAAACAAGAAAACTTATGCCTGTTTGCGTTGAAACTAAA	0	AEETRKLMPVCVETK	0	0	0	8	14	9	11	24	16	4	11	12	1	5	2	14	15	15	25	28	35	13	18	0	10	12	23	25	26	40	3	11	6	14	12	34
EETRKLMPVCVETKA	GAAGAAACCAGAAAATTGATGCCAGTGTGCGTCGAGACTAAAGCA	0	EETRKLMPVCVETKA	1	0	0	3	13	16	1	13	23	4	10	10	1	1	1	17	15	9	12	29	27	4	17	1	7	5	16	12	15	32	3	4	9	12	9	16
ETRKLMPVCVETKAI	GAAACAAGGAAATTGATGCCAGTGTGTGTGGAGACCAAGGCAATC	0	ETRKLMPVCVETKAI	0	0	0	4	13	10	13	21	8	9	17	3	2	12	2	13	24	20	20	21	36	9	15	1	10	2	12	22	16	72	2	8	4	11	8	19
TRKLMPVCVETKAIV	ACCAGAAAATTGATGCCAGTTTGCGTAGAAACGAAGGCTATTGTT	0	TRKLMPVCVETKAIV	0	0	0	3	2	20	3	0	13	1	0	5	1	0	1	30	26	29	37	37	12	9	20	1	9	11	7	20	24	37	2	7	1	11	16	9
RKLMPVCVETKAIVS	CGTAAATTAATGCCAGTCTGTGTAGAGACTAAGGCTATTGTGTCT	0	RKLMPVCVETKAIVS	0	0	0	0	11	13	1	23	26	0	22	4	1	5	2	26	33	19	42	37	34	8	23	0	15	15	18	45	26	55	10	14	10	22	22	20
KLMPVCVETKAIVST	AAATTGATGCCAGTTTGTGTAGAGACAAAAGCTATTGTCTCGACA	0	KLMPVCVETKAIVST	0	0	0	4	0	22	8	0	18	7	0	12	1	0	1	6	11	7	12	11	12	3	4	0	2	7	6	16	8	18	5	1	6	7	6	11
LMPVCVETKAIVSTI	CTTATGCCGGTCTGTGTTGAAACTAAAGCTATAGTGTCCACTATC	0	LMPVCVETKAIVSTI	0	0	0	0	0	15	2	0	16	1	0	5	1	0	4	8	12	12	9	8	14	4	10	0	4	2	4	11	6	14	2	4	2	8	2	7
MPVCVETKAIVSTIQ	ATGCCTGTATGCGTTGAGACAAAGGCCATTGTCTCGACAATCCAG	0	MPVCVETKAIVSTIQ	0	0	0	0	0	6	1	0	15	0	0	7	0	1	1	17	18	24	14	17	8	6	18	2	8	3	7	13	9	19	2	3	1	4	5	4
PVCVETKAIVSTIQR	CCTGTATGCGTTGAAACCAAGGCAATCGTTTCTACTATCCAAAGG	0	PVCVETKAIVSTIQR	0	1	0	5	0	3	11	0	5	3	0	1	1	1	0	27	35	35	25	18	40	12	38	1	5	3	11	18	7	47	2	0	0	6	3	16
VCVETKAIVSTIQRK	GTGTGCGTTGAAACCAAGGCCATCGTATCAACAATTCAGCGGAAA	0	VCVETKAIVSTIQRK	0	0	0	0	0	0	0	0	0	0	0	0	0	0	0	2	3	3	1	2	2	3	3	0	0	0	1	3	1	5	0	0	1	0	3	1
CVETKAIVSTIQRKY	TGCGTTGAGACGAAAGCCATTGTATCCACCATTCAGCGGAAGTAC	0	CVETKAIVSTIQRKY	0	0	0	0	0	1	0	0	2	0	1	0	0	0	0	2	4	7	2	11	3	0	5	0	0	3	4	2	4	2	0	0	0	1	3	0
VETKAIVSTIQRKYK	GTAGAGACCAAAGCTATAGTATCCACAATACAGCGTAAATACAAG	0	VETKAIVSTIQRKYK	0	0	0	0	0	1	0	0	2	0	0	0	0	0	0	10	19	10	3	7	11	11	19	2	1	2	1	3	9	16	0	1	2	1	1	8
ETKAIVSTIQRKYKG	GAAACAAAAGCCATCGTCTCGACCATTCAAAGAAAATATAAGGGT	0	ETKAIVSTIQRKYKG	0	0	0	0	0	2	0	0	7	0	0	5	0	0	3	10	20	14	0	0	2	7	14	0	0	0	0	0	5	3	0	0	0	0	0	0
TKAIVSTIQRKYKGI	ACTAAGGCCATTGTCTCCACAATTCAACGTAAATATAAGGGAATC	0	TKAIVSTIQRKYKGI	0	0	0	0	0	0	0	0	0	0	0	0	0	0	0	8	14	13	0	0	0	6	6	0	0	0	0	0	0	0	0	0	0	0	0	0
KAIVSTIQRKYKGIK	AAAGCCATTGTATCCACTATTCAAAGAAAGTACAAAGGTATCAAG	0	KAIVSTIQRKYKGIK	0	0	0	0	0	0	0	0	0	0	0	0	0	0	0	9	17	13	2	2	0	8	16	0	1	0	0	1	0	0	0	0	0	0	1	0
AIVSTIQRKYKGIKI	GCTATAGTTAGCACAATCCAGAGAAAGTATAAAGGCATAAAAATC	0	AIVSTIQRKYKGIKI	0	0	0	0	0	0	0	0	0	0	0	0	0	0	0	12	20	10	0	0	0	6	13	0	3	0	0	0	0	0	0	0	0	0	0	0
IVSTIQRKYKGIKIQ	ATTGTCAGTACAATACAAAGGAAGTATAAAGGTATAAAGATACAG	0	IVSTIQRKYKGIKIQ	0	0	0	0	0	0	5	0	0	2	0	0	0	0	0	15	23	18	0	1	0	11	14	0	0	0	0	2	1	0	0	0	0	0	0	0
VSTIQRKYKGIKIQE	GTCTCTACTATCCAGCGAAAGTATAAAGGTATCAAGATTCAGGAG	0	VSTIQRKYKGIKIQE	0	0	0	4	0	0	1	0	0	1	0	0	0	0	0	15	29	15	2	0	2	5	15	0	0	0	0	7	0	1	0	0	0	1	0	0
STIQRKYKGIKIQEG	TCCACAATACAGAGAAAATATAAAGGTATAAAAATTCAAGAAGGT	0	STIQRKYKGIKIQEG	0	0	0	4	0	0	12	0	0	8	0	0	2	0	0	8	12	6	7	7	2	1	11	1	11	1	0	13	5	4	4	0	0	11	2	2
TIQRKYKGIKIQEGV	ACAATTCAGAGGAAATATAAGGGAATTAAAATTCAAGAAGGGGTA	0	TIQRKYKGIKIQEGV	0	0	0	7	0	1	6	0	1	1	0	3	1	0	3	17	18	18	13	4	2	8	17	0	3	0	1	13	0	1	1	0	0	2	3	1
IQRKYKGIKIQEGVV	ATCCAACGAAAATATAAGGGGATCAAGATTCAAGAAGGCGTCGTC	0	IQRKYKGIKIQEGVV	0	0	0	8	0	0	5	0	0	4	0	0	6	0	0	7	8	7	3	4	0	4	15	0	1	0	0	1	0	0	2	0	0	0	0	0
QRKYKGIKIQEGVVD	CAACGGAAGTACAAGGGTATTAAAATTCAGGAAGGTGTCGTGGAT	0	QRKYKGIKIQEGVVD	0	0	0	25	4	0	75	6	0	99	0	0	72	0	1	16	21	21	38	23	11	1	25	0	31	0	1	32	7	24	28	1	0	41	10	6
RKYKGIKIQEGVVDY	CGAAAGTACAAGGGAATAAAGATCCAAGAGGGAGTTGTTGATTAT	0	RKYKGIKIQEGVVDY	0	0	1	37	1	12	90	0	26	186	0	13	127	0	0	22	22	23	50	53	18	1	22	1	85	14	5	12	39	33	104	3	5	43	10	15
KYKGIKIQEGVVDYG	AAATACAAAGGTATTAAGATACAAGAAGGCGTGGTTGATTACGGA	0	KYKGIKIQEGVVDYG	0	0	0	12	0	1	25	0	9	51	0	6	65	0	1	10	21	9	34	24	30	0	16	0	60	12	20	4	32	64	75	7	9	24	10	26
YKGIKIQEGVVDYGA	TACAAAGGGATTAAGATTCAGGAAGGTGTAGTCGACTATGGAGCA	0	YKGIKIQEGVVDYGA	0	0	0	5	0	5	34	0	16	36	1	25	9	0	8	15	19	23	46	41	55	1	17	1	59	11	39	22	24	68	38	2	18	40	11	44
KGIKIQEGVVDYGAR	AAAGGTATAAAAATTCAAGAAGGTGTAGTAGACTATGGTGCACGC	0	KGIKIQEGVVDYGAR	0	0	0	1	0	4	1	0	19	1	0	27	0	0	23	8	15	3	13	24	46	7	7	0	3	2	35	9	10	29	4	3	32	1	8	23
GIKIQEGVVDYGARF	GGTATCAAGATTCAGGAAGGAGTTGTTGACTATGGAGCTAGATTT	0	GIKIQEGVVDYGARF	0	1	0	3	8	20	8	10	88	5	10	110	0	10	123	16	23	20	30	59	84	12	18	0	8	25	145	23	39	59	7	36	157	15	25	74
IKIQEGVVDYGARFY	ATTAAGATACAGGAAGGTGTGGTGGACTACGGAGCTCGATTCTAC	0	IKIQEGVVDYGARFY	0	0	1	0	0	11	1	0	31	0	0	28	1	0	7	15	19	15	9	23	63	7	14	0	8	1	85	18	19	49	2	5	94	8	4	55
KIQEGVVDYGARFYF	AAGATCCAAGAAGGTGTAGTTGATTATGGCGCAAGATTTTATTTT	0	KIQEGVVDYGARFYF	0	0	0	6	9	33	4	14	114	4	7	145	0	4	176	13	21	11	24	23	63	10	14	0	7	9	92	27	17	38	3	5	139	8	14	54
IQEGVVDYGARFYFY	ATACAGGAAGGCGTTGTTGACTATGGTGCAAGGTTCTACTTTTAT	0	IQEGVVDYGARFYFY	0	0	0	0	2	6	0	0	5	0	0	4	0	0	1	17	17	15	12	24	6	12	20	4	4	4	2	17	27	20	0	1	1	5	5	2
QEGVVDYGARFYFYT	CAAGAAGGGGTGGTAGATTACGGTGCTAGATTCTATTTCTATACT	0	QEGVVDYGARFYFYT	0	0	0	1	8	1	3	2	0	0	1	0	0	0	1	20	22	18	11	21	15	15	11	0	1	1	2	10	6	26	1	0	0	1	3	2
EGVVDYGARFYFYTS	GAGGGAGTTGTTGACTATGGAGCGAGATTTTATTTCTATACATCT	0	EGVVDYGARFYFYTS	0	0	0	0	0	1	0	0	1	0	0	3	0	0	0	12	19	14	7	20	5	6	17	2	4	5	4	13	20	10	1	2	6	1	3	6
GVVDYGARFYFYTSK	GGTGTCGTCGACTATGGTGCGCGCTTCTACTTCTATACATCCAAA	0	GVVDYGARFYFYTSK	0	0	0	0	14	8	1	13	15	0	8	6	0	6	2	20	21	22	12	42	23	20	22	2	2	15	8	15	32	53	1	4	2	2	17	11
VVDYGARFYFYTSKT	GTGGTTGATTATGGAGCTCGCTTTTACTTCTATACTTCCAAGACA	0	VVDYGARFYFYTSKT	0	0	0	1	2	0	0	3	0	0	2	0	0	0	0	16	33	9	6	3	8	9	22	1	1	0	0	3	1	5	0	0	1	1	0	3
VDYGARFYFYTSKTT	GTTGATTACGGTGCTAGATTTTACTTTTACACCAGCAAAACAACT	0	VDYGARFYFYTSKTT	0	0	0	3	4	4	3	1	3	0	0	0	0	0	0	15	16	11	7	4	9	5	13	2	1	0	4	6	4	4	0	0	2	1	1	4
DYGARFYFYTSKTTV	GACTATGGTGCTAGGTTCTACTTCTATACTTCAAAAACAACTGTA	0	DYGARFYFYTSKTTV	0	0	0	1	14	3	15	24	3	13	12	1	1	2	0	30	17	19	25	24	13	8	12	1	15	2	2	19	12	13	3	1	0	23	6	1
YGARFYFYTSKTTVA	TACGGAGCCAGATTCTATTTTTACACATCGAAAACCACTGTTGCT	0	YGARFYFYTSKTTVA	0	0	0	0	0	0	0	0	0	0	0	0	0	0	0	9	15	14	2	3	12	4	12	1	1	0	5	1	3	7	1	0	0	0	0	1
GARFYFYTSKTTVAS	GGCGCCAGATTTTATTTTTACACATCAAAGACTACAGTTGCAAGC	0	GARFYFYTSKTTVAS	0	0	0	0	0	0	0	0	0	0	0	0	0	0	0	8	7	10	1	1	0	5	9	0	1	0	0	0	1	0	0	0	0	0	0	0
ARFYFYTSKTTVASL	GCACGTTTCTATTTTTATACATCTAAAACTACAGTAGCTTCCTTG	0	ARFYFYTSKTTVASL	0	0	0	0	0	2	0	0	1	0	1	1	0	0	0	10	24	14	2	2	0	8	7	0	2	0	0	1	2	2	0	0	0	0	1	0
RFYFYTSKTTVASLI	AGGTTCTATTTTTACACATCGAAAACAACAGTAGCATCTCTGATT	0	RFYFYTSKTTVASLI	0	0	0	11	0	6	22	0	1	8	0	1	1	0	0	24	22	17	29	9	5	7	27	0	22	3	1	21	1	5	6	0	0	14	0	1
FYFYTSKTTVASLIN	TTTTACTTCTATACGTCAAAGACAACTGTAGCTAGTCTGATCAAC	0	FYFYTSKTTVASLIN	0	0	0	0	0	0	0	0	0	0	0	0	0	0	0	8	20	12	1	1	3	8	10	0	0	0	1	0	0	3	0	0	0	0	0	1
YFYTSKTTVASLINT	TACTTTTATACAAGTAAAACAACGGTTGCCTCACTGATAAACACA	0	YFYTSKTTVASLINT	0	0	0	6	14	10	4	10	19	0	12	15	0	4	16	11	13	7	14	24	54	6	13	0	1	14	36	3	2	28	0	11	20	2	2	25
FYTSKTTVASLINTL	TTCTACACTTCTAAGACCACCGTGGCTAGTTTGATCAATACGTTA	0	FYTSKTTVASLINTL	0	0	0	20	24	20	27	32	50	24	33	36	7	13	29	14	19	15	24	51	56	2	12	0	16	26	90	21	18	37	11	11	54	24	9	42
YTSKTTVASLINTLN	TATACTAGTAAAACAACGGTTGCCTCTCTTATTAATACATTAAAC	0	YTSKTTVASLINTLN	0	0	1	7	8	0	19	12	2	12	2	3	3	0	0	12	11	5	21	30	14	2	12	0	33	8	12	12	24	18	29	4	14	32	18	28
TSKTTVASLINTLND	ACTTCTAAAACTACTGTAGCAAGCTTAATTAACACATTAAATGAT	0	TSKTTVASLINTLND	0	0	0	3	25	23	3	49	68	6	53	91	2	29	80	11	24	17	21	22	61	9	12	2	6	12	64	17	11	22	0	12	85	13	16	55
SKTTVASLINTLNDL	AGCAAAACGACAGTGGCTAGCCTAATCAATACGCTTAATGATTTG	0	SKTTVASLINTLNDL	0	0	0	2	2	10	7	14	39	7	9	31	3	10	55	14	10	7	24	30	38	3	8	0	11	10	48	11	12	36	4	9	43	8	5	14
KTTVASLINTLNDLN	AAGACAACTGTTGCTTCATTAATCAATACTTTGAATGACCTCAAC	0	KTTVASLINTLNDLN	0	0	0	1	20	7	0	27	20	0	30	39	0	16	46	19	16	12	26	17	51	5	22	0	7	14	64	30	20	43	3	14	72	4	12	37
TTVASLINTLNDLNE	ACTACCGTTGCCAGCTTGATCAACACTTTGAATGATTTAAACGAA	0	TTVASLINTLNDLNE	0	0	0	0	1	3	0	0	11	0	0	16	0	0	3	7	6	7	8	12	21	6	3	0	4	1	6	10	5	31	0	1	7	3	3	8
TVASLINTLNDLNET	ACGGTGGCAAGTTTGATAAATACTTTGAACGACTTAAATGAAACA	0	TVASLINTLNDLNET	0	0	0	0	0	14	0	0	14	0	0	4	0	0	2	23	37	20	7	8	14	15	13	0	0	1	4	2	1	43	0	0	1	0	0	3
VASLINTLNDLNETL	GTTGCCTCCTTGATTAACACATTAAATGATTTGAATGAGACATTG	0	VASLINTLNDLNETL	0	0	0	0	0	1	0	0	0	0	0	0	1	0	0	14	11	15	1	2	7	8	12	0	0	0	1	1	0	2	0	0	0	0	0	0
ASLINTLNDLNETLV	GCGTCGTTAATAAACACATTGAACGATTTGAATGAGACCCTGGTC	0	ASLINTLNDLNETLV	0	0	1	0	18	17	0	18	52	0	2	44	0	0	28	14	18	21	10	12	32	5	17	1	4	3	24	5	9	50	2	2	11	2	2	39
SLINTLNDLNETLVT	AGCCTTATTAATACTTTGAACGATTTGAACGAGACGTTGGTCACA	0	SLINTLNDLNETLVT	0	0	0	0	10	16	1	13	55	0	19	53	0	14	29	19	17	18	11	24	18	3	13	0	3	9	17	14	14	16	0	9	13	1	7	9
LINTLNDLNETLVTM	TTAATTAACACTTTAAATGATTTAAACGAGACACTTGTTACAATG	0	LINTLNDLNETLVTM	0	0	0	0	6	23	1	13	28	0	4	38	0	0	23	9	15	15	11	23	14	6	18	2	3	6	10	17	13	22	1	4	11	0	13	8
INTLNDLNETLVTMP	ATTAACACTCTCAACGATCTAAATGAAACTTTAGTTACTATGCCT	0	INTLNDLNETLVTMP	0	0	1	2	0	20	3	0	41	5	0	30	1	0	16	18	30	26	14	30	51	9	22	0	2	4	45	28	19	73	1	0	18	7	6	68
NTLNDLNETLVTMPL	AACACTTTAAATGATCTAAATGAAACTCTAGTAACAATGCCATTA	0	NTLNDLNETLVTMPL	0	0	0	0	8	20	0	6	40	0	2	47	0	0	49	20	13	14	10	13	46	9	10	1	1	3	73	15	11	23	1	2	72	1	3	50
TLNDLNETLVTMPLG	ACTTTAAACGATTTAAACGAAACTCTTGTGACAATGCCATTAGGT	0	TLNDLNETLVTMPLG	1	0	0	1	0	23	1	1	91	2	3	103	1	1	127	14	23	19	10	33	68	9	21	0	4	5	108	27	18	45	0	1	119	10	14	56
LNDLNETLVTMPLGY	CTAAATGATTTAAATGAAACTCTAGTGACCATGCCTCTTGGTTAT	0	LNDLNETLVTMPLGY	0	0	0	0	9	17	0	20	72	0	3	75	1	6	118	20	18	15	20	64	67	7	21	0	11	25	96	19	34	37	1	16	133	7	22	49
NDLNETLVTMPLGYV	AACGACCTGAATGAGACCTTAGTTACTATGCCACTGGGCTATGTA	0	NDLNETLVTMPLGYV	0	0	0	0	0	6	0	0	13	0	0	16	0	0	6	3	11	3	2	9	30	8	6	0	0	0	24	9	10	25	1	2	34	0	1	28
DLNETLVTMPLGYVT	GATTTGAATGAAACTCTAGTCACCATGCCACTAGGTTACGTTACT	0	DLNETLVTMPLGYVT	0	1	0	0	9	13	0	9	36	0	8	37	0	1	51	8	17	15	13	42	45	2	13	0	3	16	70	18	23	44	1	1	59	8	9	41
LNETLVTMPLGYVTH	TTGAACGAAACCTTGGTAACCATGCCATTGGGATACGTAACACAC	0	LNETLVTMPLGYVTH	0	0	0	2	8	10	5	18	21	0	10	40	0	12	29	13	20	12	7	42	45	7	9	1	2	25	43	11	31	26	0	22	33	5	7	32
NETLVTMPLGYVTHG	AATGAAACATTGGTTACCATGCCACTTGGCTATGTGACCCATGGA	0	NETLVTMPLGYVTHG	0	0	0	0	0	25	2	0	56	0	0	61	0	0	19	14	27	11	8	43	31	3	17	0	6	7	23	6	25	28	1	4	12	0	3	27
ETLVTMPLGYVTHGL	GAGACTCTAGTCACTATGCCTTTAGGTTACGTGACCCACGGTTTA	0	ETLVTMPLGYVTHGL	0	0	0	0	0	10	0	0	26	0	0	19	0	0	7	6	22	22	10	17	59	4	11	2	2	3	26	4	13	65	0	2	21	3	6	42
TLVTMPLGYVTHGLN	ACATTAGTAACAATGCCCTTAGGCTATGTAACACATGGTTTGAAT	0	TLVTMPLGYVTHGLN	0	0	0	3	13	23	12	25	63	8	20	43	2	6	13	19	26	32	24	67	57	8	30	1	5	14	39	20	35	87	1	9	19	4	12	48
LVTMPLGYVTHGLNL	TTAGTTACTATGCCTTTGGGCTACGTTACGCATGGATTGAACTTA	0	LVTMPLGYVTHGLNL	0	0	0	0	2	2	0	5	1	0	2	1	0	0	5	18	19	13	11	32	18	3	14	2	2	8	9	12	17	43	1	6	0	9	6	5
VTMPLGYVTHGLNLE	GTTACCATGCCACTTGGGTACGTGACACATGGGTTGAACCTAGAA	0	VTMPLGYVTHGLNLE	0	0	0	0	3	2	0	5	1	6	8	0	0	2	0	11	14	10	9	23	6	8	19	3	1	13	4	6	11	10	0	6	3	3	11	6
TMPLGYVTHGLNLEE	ACTATGCCTTTAGGATACGTTACTCATGGATTAAACCTAGAAGAA	0	TMPLGYVTHGLNLEE	0	0	0	2	2	1	1	10	6	1	3	1	0	0	0	6	9	3	11	11	0	2	2	0	3	8	0	13	9	0	1	2	0	2	5	0
MPLGYVTHGLNLEEA	ATGCCGTTAGGTTACGTCACACATGGCTTAAACCTAGAGGAGGCC	0	MPLGYVTHGLNLEEA	0	0	0	0	0	0	0	0	0	0	0	0	0	0	0	6	9	2	6	5	0	3	10	0	0	1	0	4	4	4	4	0	0	0	0	0
PLGYVTHGLNLEEAA	CCTTTAGGTTATGTTACACATGGATTGAACCTAGAAGAAGCTGCA	0	PLGYVTHGLNLEEAA	0	0	0	0	0	0	0	0	0	0	0	0	0	0	0	10	7	11	4	1	1	5	9	0	0	0	1	2	0	3	0	0	0	0	0	0
LGYVTHGLNLEEAAR	TTAGGTTACGTCACCCACGGTTTAAATTTGGAAGAGGCCGCCAGA	0	LGYVTHGLNLEEAAR	0	0	0	0	0	0	0	0	0	0	0	0	2	0	0	11	8	10	4	1	0	4	4	0	0	0	0	1	1	0	0	0	0	0	0	0
GYVTHGLNLEEAARY	GGATATGTTACTCATGGTCTTAACTTGGAAGAAGCTGCAAGATAT	0	GYVTHGLNLEEAARY	0	0	0	2	3	2	4	10	2	4	4	3	0	0	0	35	23	27	26	11	12	14	19	0	9	2	2	23	11	20	0	0	1	15	2	5
YVTHGLNLEEAARYM	TACGTTACGCACGGATTGAACTTAGAAGAAGCGGCAAGATATATG	0	YVTHGLNLEEAARYM	0	0	0	4	1	0	4	2	0	9	0	0	2	0	0	10	19	23	21	11	5	8	10	0	4	4	0	10	9	17	1	0	0	12	3	0
VTHGLNLEEAARYMR	GTCACTCACGGGCTTAACCTTGAGGAAGCAGCTCGCTATATGCGT	0	VTHGLNLEEAARYMR	0	0	0	0	0	0	0	0	0	0	0	0	0	0	0	2	7	3	1	13	0	2	9	0	0	0	0	3	15	0	0	2	0	0	2	0
THGLNLEEAARYMRS	ACTCACGGGCTTAATTTAGAAGAAGCTGCTAGGTACATGCGTTCC	0	THGLNLEEAARYMRS	0	0	0	3	0	1	1	0	0	0	0	0	0	0	0	10	12	7	15	8	2	3	9	0	3	1	1	15	9	4	2	0	0	2	2	2
HGLNLEEAARYMRSL	CATGGTTTGAACTTGGAAGAAGCTGCTAGATACATGAGATCTTTG	0	HGLNLEEAARYMRSL	1	0	0	1	25	9	2	57	19	1	66	21	0	86	16	7	12	6	17	60	25	3	5	1	5	44	27	8	20	39	1	53	6	14	42	26
GLNLEEAARYMRSLK	GGTCTGAACTTGGAGGAAGCCGCCAGATACATGCGCAGTTTGAAG	0	GLNLEEAARYMRSLK	0	0	0	4	14	1	5	23	2	2	45	0	1	83	0	14	12	10	14	71	19	2	9	0	4	59	14	10	10	27	2	81	12	7	33	25
LNLEEAARYMRSLKV	TTAAATTTGGAAGAGGCTGCTAGATACATGAGGTCCTTAAAAGTA	0	LNLEEAARYMRSLKV	0	0	0	0	21	16	0	28	42	0	26	18	0	22	9	17	20	14	16	42	38	14	19	2	0	15	26	11	23	49	0	4	11	4	27	30
NLEEAARYMRSLKVP	AATTTAGAAGAGGCTGCTAGATACATGAGGAGTTTAAAAGTACCG	0	NLEEAARYMRSLKVP	0	0	0	0	16	14	0	37	49	1	46	47	0	32	65	6	10	3	11	38	25	4	6	0	6	44	36	7	16	19	4	53	57	8	20	13
LEEAARYMRSLKVPA	TTAGAAGAGGCTGCTAGGTATATGCGGTCTTTAAAGGTCCCTGCT	0	LEEAARYMRSLKVPA	0	0	0	0	0	7	4	0	1	2	0	1	0	0	0	24	30	17	3	1	2	9	18	2	1	0	1	0	0	1	0	0	0	1	0	1
EEAARYMRSLKVPAT	GAAGAAGCAGCCCGTTACATGAGGTCACTTAAGGTACCAGCTACT	0	EEAARYMRSLKVPAT	0	1	0	3	23	40	3	38	89	7	67	115	1	90	175	5	12	11	3	87	52	3	7	0	8	106	75	15	24	27	0	129	87	7	49	37
EAARYMRSLKVPATV	GAGGCCGCAAGATATATGAGGTCACTAAAGGTTCCGGCAACAGTA	0	EAARYMRSLKVPATV	0	0	0	4	40	7	1	58	40	1	79	28	0	42	23	12	19	12	5	42	17	7	11	0	0	20	20	6	10	31	1	19	8	1	14	17
AARYMRSLKVPATVS	GCCGCCCGCTACATGAGGTCGCTGAAGGTCCCAGCAACCGTTTCT	0	AARYMRSLKVPATVS	0	0	0	0	0	1	0	0	0	0	0	0	0	0	0	12	15	8	0	0	0	2	6	1	2	0	0	1	1	0	0	0	0	0	0	0
ARYMRSLKVPATVSV	GCCAGGTACATGAGGTCTCTAAAAGTTCCCGCCACTGTCTCGGTC	0	ARYMRSLKVPATVSV	0	0	0	0	0	0	0	0	0	0	0	0	0	0	0	1	7	6	2	5	3	1	7	2	1	0	0	0	4	5	1	0	0	0	0	0
RYMRSLKVPATVSVS	AGATATATGAGATCTTTGAAAGTTCCAGCTACAGTATCCGTTTCT	0	RYMRSLKVPATVSVS	1	0	0	18	20	54	12	48	175	11	79	181	1	40	191	19	23	13	20	131	83	6	13	2	9	137	121	20	24	34	0	176	142	12	85	46
YMRSLKVPATVSVSS	TATATGAGATCATTGAAGGTGCCTGCTACTGTGAGCGTTTCTAGT	0	YMRSLKVPATVSVSS	0	0	0	0	6	30	0	11	42	0	11	42	0	1	11	29	38	34	12	77	42	11	27	0	5	53	41	19	47	55	1	28	15	7	44	33
MRSLKVPATVSVSSP	ATGAGGAGCTTAAAGGTTCCCGCTACAGTTAGCGTTTCATCACCA	0	MRSLKVPATVSVSSP	0	0	0	0	3	5	0	1	5	0	0	4	0	0	1	12	16	14	6	7	11	6	15	1	0	0	7	4	2	17	0	0	1	0	2	3
RSLKVPATVSVSSPD	AGGAGTTTAAAGGTGCCAGCTACGGTTTCAGTGTCGTCTCCTGAT	0	RSLKVPATVSVSSPD	0	0	0	3	0	3	0	0	3	0	0	3	0	0	0	20	27	16	17	3	15	7	16	2	2	0	1	8	8	21	0	1	1	3	3	0
SLKVPATVSVSSPDA	AGCCTGAAGGTTCCAGCGACGGTCTCCGTTAGTTCCCCAGACGCA	0	SLKVPATVSVSSPDA	0	0	0	0	1	3	0	0	5	0	1	1	0	0	0	14	19	18	11	13	16	7	26	0	6	0	2	4	10	25	0	0	1	3	0	1
LKVPATVSVSSPDAV	TTAAAAGTCCCAGCTACTGTAAGCGTTTCTAGTCCAGATGCTGTC	0	LKVPATVSVSSPDAV	0	1	0	0	0	3	0	0	0	0	0	0	0	1	0	18	20	23	9	9	10	4	14	2	1	2	4	10	7	37	1	0	0	0	0	3
KVPATVSVSSPDAVT	AAAGTGCCCGCGACAGTAAGTGTCTCTTCTCCTGATGCGGTTACG	0	KVPATVSVSSPDAVT	0	0	0	0	2	0	1	1	0	0	0	0	0	0	0	18	10	20	7	7	29	9	15	0	0	0	14	4	2	36	0	0	5	1	0	6
VPATVSVSSPDAVTA	GTTCCAGCTACAGTGTCTGTTTCGTCACCAGATGCTGTTACTGCC	0	VPATVSVSSPDAVTA	0	0	0	0	0	0	0	0	0	0	0	0	0	0	0	8	7	9	1	4	4	3	9	1	0	0	1	4	1	9	0	0	0	0	0	2
PATVSVSSPDAVTAY	CCTGCGACCGTTTCTGTTAGTTCGCCCGATGCAGTAACAGCATAT	0	PATVSVSSPDAVTAY	0	0	0	0	0	1	0	0	0	0	0	1	0	0	0	19	22	22	17	16	17	5	17	1	0	0	5	13	10	45	0	0	1	4	3	7
ATVSVSSPDAVTAYN	GCTACCGTCTCAGTTAGTTCCCCTGACGCAGTTACCGCATATAAT	0	ATVSVSSPDAVTAYN	0	0	0	0	5	0	1	5	0	0	7	0	0	1	0	18	25	15	16	22	34	9	17	1	4	1	12	19	17	66	1	3	3	4	0	17
TVSVSSPDAVTAYNG	ACGGTCTCAGTCAGCAGCCCTGATGCAGTCACAGCATACAATGGT	0	TVSVSSPDAVTAYNG	0	0	0	1	0	0	7	0	0	4	0	0	1	0	0	23	25	18	20	18	13	17	11	0	3	0	3	6	15	32	0	0	1	6	5	5
VSVSSPDAVTAYNGY	GTTTCAGTTTCTTCTCCAGATGCTGTCACTGCTTATAATGGCTAT	0	VSVSSPDAVTAYNGY	0	0	0	1	25	9	0	52	12	1	47	9	1	5	1	19	23	16	22	57	16	10	17	0	4	22	4	14	19	26	2	16	1	7	31	18
SVSSPDAVTAYNGYL	TCAGTTTCTTCACCGGACGCAGTCACCGCCTACAACGGTTACTTA	0	SVSSPDAVTAYNGYL	0	0	0	0	2	2	0	7	4	0	9	6	0	2	1	9	9	8	3	24	9	4	7	0	2	20	3	2	14	22	0	16	3	2	9	11
VSSPDAVTAYNGYLT	GTGAGCTCCCCAGATGCAGTAACAGCTTATAACGGATATTTGACT	0	VSSPDAVTAYNGYLT	0	0	0	1	5	3	1	8	6	1	2	2	0	1	0	16	27	17	32	32	6	10	17	1	6	10	1	29	28	21	3	4	1	19	9	4
SSPDAVTAYNGYLTS	TCTTCCCCTGATGCCGTTACTGCCTATAATGGTTACTTGACCTCC	0	SSPDAVTAYNGYLTS	0	0	0	9	1	4	12	0	13	13	0	8	4	0	8	6	7	7	14	20	5	2	3	1	14	4	0	4	8	14	7	2	0	22	6	2
SPDAVTAYNGYLTSS	AGCCCTGATGCGGTGACAGCTTATAATGGATACCTGACATCATCT	0	SPDAVTAYNGYLTSS	0	0	0	6	17	0	23	22	1	23	15	0	2	2	1	25	21	12	65	40	29	6	14	0	31	12	7	38	20	46	4	4	0	30	14	11
PDAVTAYNGYLTSSS	CCCGATGCAGTTACTGCATACAACGGGTATTTGACATCATCTAGT	0	PDAVTAYNGYLTSSS	0	0	0	25	8	2	99	17	1	146	8	0	106	0	0	23	35	14	48	33	2	0	22	0	83	9	0	20	28	8	83	4	1	70	20	1
DAVTAYNGYLTSSSK	GACGCTGTCACAGCATATAACGGTTATTTGACAAGCTCGAGTAAG	0	DAVTAYNGYLTSSSK	0	0	0	22	0	1	68	0	0	117	0	0	70	0	0	11	23	16	38	20	7	1	13	0	76	3	5	12	15	33	56	1	1	16	7	5
AVTAYNGYLTSSSKT	GCAGTTACGGCATATAACGGCTATTTGACTAGTTCGTCAAAGACC	0	AVTAYNGYLTSSSKT	0	0	0	4	0	0	13	0	0	9	0	0	1	0	0	4	9	8	10	0	0	2	6	1	6	0	0	6	0	0	3	0	0	6	1	1
VTAYNGYLTSSSKTP	GTTACAGCTTACAACGGTTACTTAACGAGTTCATCGAAGACCCCT	0	VTAYNGYLTSSSKTP	0	0	0	11	3	0	23	0	0	15	0	0	4	0	0	13	21	16	28	9	6	5	17	1	15	1	1	16	1	4	2	0	0	8	0	0
TAYNGYLTSSSKTPE	ACTGCTTATAACGGGTATCTGACGTCTTCTTCTAAAACGCCCGAA	0	TAYNGYLTSSSKTPE	1	0	1	8	0	0	43	0	0	53	1	0	12	1	0	18	15	15	35	3	10	4	11	0	62	1	1	20	3	19	40	0	0	37	0	5
AYNGYLTSSSKTPEE	GCTTATAACGGTTATCTAACAAGTTCATCCAAAACGCCAGAGGAA	0	AYNGYLTSSSKTPEE	0	0	0	3	2	0	8	0	0	7	0	0	2	0	0	5	15	7	21	3	0	1	7	0	13	1	0	9	5	0	5	0	0	12	1	0
YNGYLTSSSKTPEEH	TATAACGGTTACTTAACTTCTTCTTCTAAGACACCTGAGGAACAT	0	YNGYLTSSSKTPEEH	0	0	0	10	2	0	12	0	0	6	1	0	0	0	0	10	16	6	23	2	2	4	5	0	15	1	1	11	0	2	4	0	0	7	0	0
NGYLTSSSKTPEEHF	AACGGTTATCTAACCTCAAGTTCAAAGACGCCGGAAGAACACTTC	0	NGYLTSSSKTPEEHF	0	0	0	0	0	1	0	0	1	0	0	0	0	0	0	3	13	4	12	2	0	5	7	3	3	2	0	5	0	0	1	2	0	2	0	0
GYLTSSSKTPEEHFI	GGGTATTTAACTTCTAGTAGTAAGACACCGGAAGAGCATTTCATA	0	GYLTSSSKTPEEHFI	0	0	0	0	0	0	0	0	0	0	0	0	1	0	0	3	5	5	4	0	5	7	3	0	1	0	0	4	0	9	0	0	0	2	0	0
YLTSSSKTPEEHFIE	TACCTAACCAGTTCCAGCAAAACCCCGGAGGAGCATTTTATAGAA	0	YLTSSSKTPEEHFIE	0	0	0	3	0	0	5	0	0	0	0	0	0	0	0	8	11	4	6	7	2	2	8	0	0	3	0	0	2	2	1	1	0	0	1	0
LTSSSKTPEEHFIET	CTAACAAGTTCCAGTAAAACTCCAGAAGAACACTTTATTGAAACC	0	LTSSSKTPEEHFIET	0	0	0	0	0	0	0	0	0	0	0	0	0	0	1	9	10	3	4	0	0	1	8	0	1	0	0	3	0	0	0	0	0	0	0	0
TSSSKTPEEHFIETI	ACAAGTTCTTCAAAGACTCCAGAAGAGCATTTTATAGAGACCATT	0	TSSSKTPEEHFIETI	0	0	1	5	1	0	1	0	0	3	0	0	0	0	0	12	15	7	13	8	4	11	15	1	11	0	2	12	9	14	1	0	0	3	2	4
SSSKTPEEHFIETIS	TCTAGTTCTAAAACTCCTGAAGAACACTTCATTGAAACTATCAGT	0	SSSKTPEEHFIETIS	0	0	0	11	1	7	42	0	15	45	1	11	25	0	0	10	18	6	46	10	3	5	20	1	35	5	0	16	5	7	29	1	0	32	1	3
SSKTPEEHFIETISL	TCTTCTAAAACGCCTGAGGAACATTTCATAGAGACCATTTCTTTG	0	SSKTPEEHFIETISL	0	0	1	28	16	7	66	24	22	104	19	12	61	9	9	20	21	13	44	38	41	0	14	0	74	4	30	14	19	55	50	4	20	28	13	43
SKTPEEHFIETISLA	AGCAAAACACCTGAAGAACACTTTATTGAAACGATAAGTTTAGCT	0	SKTPEEHFIETISLA	0	0	0	3	0	21	13	0	44	15	1	56	16	2	46	5	14	14	20	17	40	0	9	1	53	8	40	8	11	43	43	2	26	23	2	21
KTPEEHFIETISLAG	AAGACTCCAGAAGAACACTTTATAGAGACAATATCTCTGGCCGGT	0	KTPEEHFIETISLAG	0	0	0	10	3	4	26	0	6	53	1	5	25	0	0	8	6	10	24	7	16	1	9	0	32	1	10	8	10	36	64	2	4	24	1	6
TPEEHFIETISLAGS	ACACCAGAAGAACATTTTATTGAGACAATAAGCTTAGCAGGCAGT	0	TPEEHFIETISLAGS	0	0	0	8	16	25	65	29	62	106	17	60	85	8	25	11	36	13	65	39	38	2	23	0	82	32	34	24	25	46	98	10	36	36	35	41
PEEHFIETISLAGSY	CCAGAAGAACATTTCATTGAGACTATTTCTTTAGCCGGATCCTAC	0	PEEHFIETISLAGSY	0	0	0	0	2	0	0	9	0	0	20	0	0	17	0	0	1	0	0	1	0	0	0	0	0	1	0	0	0	0	0	2	0	0	2	0
EEHFIETISLAGSYK	GAAGAACATTTCATTGAAACTATAAGTCTGGCGGGAAGTTACAAG	0	EEHFIETISLAGSYK	0	0	0	15	66	44	77	142	113	135	228	118	99	213	156	15	26	15	48	120	107	2	18	0	92	129	172	16	41	52	99	138	244	47	90	93
EHFIETISLAGSYKD	GAACACTTCATAGAAACTATATCCCTAGCTGGTTCTTACAAGGAT	0	EHFIETISLAGSYKD	0	0	0	16	35	25	55	79	69	76	73	93	52	47	102	17	20	25	45	75	85	3	17	1	83	30	121	25	26	61	60	31	135	59	38	86
HFIETISLAGSYKDW	CACTTTATAGAAACCATTTCTTTGGCTGGATCGTATAAGGATTGG	0	HFIETISLAGSYKDW	0	0	0	9	10	7	24	23	38	35	30	50	27	20	49	9	9	11	33	34	28	1	6	1	45	18	41	18	14	37	46	26	51	31	15	22
FIETISLAGSYKDWS	TTTATAGAAACCATTAGTTTGGCCGGTAGTTATAAAGACTGGTCA	0	FIETISLAGSYKDWS	0	0	0	10	13	19	76	21	44	82	25	57	54	12	51	11	15	8	27	13	18	5	10	0	40	10	40	19	5	34	32	16	43	20	11	22
IETISLAGSYKDWSY	ATTGAGACGATATCGCTTGCCGGTTCATACAAGGACTGGAGTTAC	0	IETISLAGSYKDWSY	2	0	1	34	30	16	85	62	44	109	98	56	62	125	94	13	18	12	47	109	119	1	15	0	68	118	142	21	21	55	63	172	182	54	67	61
ETISLAGSYKDWSYS	GAAACCATTAGCCTTGCCGGCTCGTATAAGGATTGGTCATACTCT	0	ETISLAGSYKDWSYS	1	0	0	13	16	19	58	43	58	40	88	61	17	83	75	28	27	25	68	130	148	5	20	0	57	152	214	31	43	87	24	208	256	70	81	105
TISLAGSYKDWSYSG	ACTATAAGCCTAGCAGGAAGCTACAAGGATTGGTCATACTCTGGT	0	TISLAGSYKDWSYSG	0	1	0	15	33	26	11	52	57	7	50	41	2	34	10	33	27	16	34	51	30	9	17	0	19	29	17	18	11	27	4	15	15	24	23	16
ISLAGSYKDWSYSGQ	ATTAGCCTAGCAGGTAGTTACAAAGATTGGTCATATTCGGGCCAA	0	ISLAGSYKDWSYSGQ	0	0	0	0	4	0	0	0	0	0	0	0	0	0	0	16	15	13	1	6	10	2	15	0	0	0	1	2	2	11	0	0	0	0	0	1
SLAGSYKDWSYSGQS	AGCTTAGCTGGATCATACAAAGATTGGTCCTACTCTGGACAATCC	0	SLAGSYKDWSYSGQS	0	0	0	0	0	0	0	0	0	0	0	0	0	0	0	0	8	3	4	9	0	6	2	0	0	1	1	8	4	6	1	0	0	2	2	1
LAGSYKDWSYSGQST	TTGGCTGGTAGCTATAAAGACTGGAGTTATTCTGGTCAATCCACT	0	LAGSYKDWSYSGQST	0	0	0	0	0	0	0	0	0	0	0	0	0	0	0	2	1	1	0	0	0	0	0	0	0	0	0	1	0	0	0	0	0	5	0	0
AGSYKDWSYSGQSTQ	GCTGGTTCCTATAAAGACTGGTCTTATAGCGGCCAGAGTACCCAG	0	AGSYKDWSYSGQSTQ	0	0	0	12	0	0	43	0	2	74	0	0	81	0	1	10	22	15	58	21	0	2	13	2	88	2	0	9	14	4	112	0	0	25	9	3
GSYKDWSYSGQSTQL	GGTAGTTATAAGGACTGGTCCTACAGTGGACAGTCGACACAATTA	0	GSYKDWSYSGQSTQL	0	0	0	17	0	4	56	0	6	91	0	1	92	1	0	24	25	31	65	16	14	0	25	1	108	1	1	9	20	16	130	1	0	44	7	1
SYKDWSYSGQSTQLG	TCCTATAAAGATTGGTCCTACTCTGGTCAATCCACTCAATTAGGT	0	SYKDWSYSGQSTQLG	0	1	0	18	1	5	36	0	8	54	0	2	56	2	3	9	7	9	37	16	8	0	12	1	61	2	0	3	8	20	79	0	0	34	5	3
YKDWSYSGQSTQLGI	TACAAAGACTGGTCTTATAGTGGGCAATCAACTCAATTGGGTATC	0	YKDWSYSGQSTQLGI	0	0	0	12	7	14	63	9	15	138	7	5	125	3	0	18	25	15	73	55	35	2	13	1	111	10	13	6	28	69	163	3	2	18	14	18
KDWSYSGQSTQLGIE	AAGGACTGGTCTTACTCAGGTCAATCGACCCAACTTGGTATTGAA	0	KDWSYSGQSTQLGIE	0	0	0	23	0	4	61	0	7	122	1	1	131	0	0	7	21	11	44	20	11	3	14	1	86	3	6	6	14	24	97	0	2	23	11	15
DWSYSGQSTQLGIEF	GATTGGTCTTATTCCGGACAGTCAACTCAATTGGGTATCGAATTT	0	DWSYSGQSTQLGIEF	0	1	0	13	2	15	49	0	19	96	1	6	82	0	0	15	12	14	25	27	5	1	24	0	64	0	1	11	12	12	64	1	0	9	6	9
WSYSGQSTQLGIEFL	TGGTCATATTCGGGTCAATCAACCCAATTGGGCATAGAATTTTTG	0	WSYSGQSTQLGIEFL	0	0	1	8	3	0	28	3	1	68	4	0	74	3	0	7	9	7	20	13	1	0	11	0	29	2	1	4	7	4	36	2	0	8	8	2
SYSGQSTQLGIEFLK	TCATACAGTGGACAATCAACACAACTGGGCATTGAATTTCTTAAA	0	SYSGQSTQLGIEFLK	0	0	1	28	12	10	94	20	12	189	9	4	208	1	5	20	17	23	54	18	11	3	19	2	113	2	12	12	23	17	130	5	3	19	16	1
YSGQSTQLGIEFLKR	TACAGCGGTCAATCCACCCAACTCGGTATAGAATTCCTGAAGCGA	0	YSGQSTQLGIEFLKR	0	0	0	5	1	0	32	0	1	56	0	0	50	0	0	6	10	3	13	15	0	0	5	0	25	1	0	2	12	2	25	0	0	8	3	0
SGQSTQLGIEFLKRG	TCGGGGCAGAGTACCCAATTGGGTATTGAATTTCTAAAAAGAGGC	0	SGQSTQLGIEFLKRG	0	0	0	0	0	0	0	0	0	0	0	0	0	0	0	8	12	7	7	15	3	9	5	0	8	1	4	4	6	20	0	0	0	0	1	1
GQSTQLGIEFLKRGD	GGTCAGTCTACCCAATTAGGAATAGAATTTTTGAAACGTGGTGAT	0	GQSTQLGIEFLKRGD	0	0	0	2	1	0	1	1	0	0	0	0	0	0	1	13	30	30	18	17	12	11	21	2	4	5	1	19	15	30	0	2	0	4	3	3
QSTQLGIEFLKRGDK	CAATCTACCCAATTGGGTATAGAGTTTCTCAAGCGCGGTGATAAA	0	QSTQLGIEFLKRGDK	0	0	0	4	8	5	7	10	11	0	5	7	1	1	0	27	33	19	23	34	23	17	19	2	2	8	5	13	31	34	0	3	0	4	14	9
STQLGIEFLKRGDKS	TCCACGCAATTAGGCATTGAGTTTCTGAAGAGAGGGGACAAATCC	0	STQLGIEFLKRGDKS	0	0	0	0	0	6	0	0	1	0	0	1	0	0	0	11	4	7	4	3	0	4	4	1	2	1	0	2	2	0	1	0	0	3	0	1
TQLGIEFLKRGDKSV	ACACAATTAGGTATTGAATTCTTAAAAAGAGGTGACAAAAGCGTT	0	TQLGIEFLKRGDKSV	0	0	0	0	0	1	0	0	0	0	0	0	1	0	0	14	21	14	6	5	0	6	15	0	0	0	0	7	1	0	0	0	0	0	0	0
QLGIEFLKRGDKSVY	CAGTTAGGCATTGAGTTTTTGAAGAGGGGAGATAAGAGTGTCTAT	0	QLGIEFLKRGDKSVY	0	0	0	4	0	7	1	0	4	0	0	0	0	0	0	25	17	17	11	39	15	8	20	1	0	2	2	12	14	17	2	3	0	8	12	0
LGIEFLKRGDKSVYY	CTAGGAATTGAGTTTTTAAAAAGGGGAGATAAATCCGTTTATTAC	0	LGIEFLKRGDKSVYY	0	0	0	3	0	0	3	0	6	3	0	4	2	0	0	11	13	5	3	24	0	3	12	1	0	4	0	1	8	1	0	0	0	0	4	0
GIEFLKRGDKSVYYT	GGTATTGAATTTTTGAAAAGGGGCGATAAATCAGTGTACTATACC	0	GIEFLKRGDKSVYYT	0	0	0	0	18	2	0	12	2	0	3	0	0	0	0	5	7	4	3	1	2	6	3	0	0	1	0	0	3	0	0	0	0	0	0	0
IEFLKRGDKSVYYTS	ATTGAATTCTTGAAAAGAGGGGACAAGTCTGTCTACTATACTTCA	0	IEFLKRGDKSVYYTS	0	0	0	0	0	0	0	0	0	0	0	0	0	0	0	15	21	16	0	1	4	5	19	1	0	0	1	1	1	1	0	0	0	0	0	0
EFLKRGDKSVYYTSN	GAATTTTTGAAGAGAGGAGATAAGAGTGTTTACTATACTAGTAAC	0	EFLKRGDKSVYYTSN	0	0	0	2	17	25	4	23	59	2	7	53	0	2	18	15	15	19	28	42	20	7	19	1	13	16	18	22	20	25	3	17	10	29	32	30
FLKRGDKSVYYTSNP	TTTTTGAAGAGAGGTGATAAGAGTGTTTATTATACTAGCAACCCA	0	FLKRGDKSVYYTSNP	0	0	0	7	26	17	18	59	50	36	45	46	22	25	37	15	17	11	38	33	29	3	4	0	50	33	48	21	10	30	30	23	37	31	25	41
LKRGDKSVYYTSNPT	TTGAAGAGGGGGGACAAGTCAGTTTATTACACATCTAATCCCACT	0	LKRGDKSVYYTSNPT	0	0	0	4	10	9	19	14	26	9	5	21	7	2	8	10	13	9	24	19	17	1	8	0	30	7	10	12	13	14	28	1	11	29	4	16
KRGDKSVYYTSNPTT	AAGCGTGGGGATAAATCTGTGTATTATACAAGTAATCCAACCACA	0	KRGDKSVYYTSNPTT	0	0	0	12	0	4	13	0	23	35	0	17	18	0	8	10	8	8	33	10	9	2	15	0	40	1	9	9	18	17	28	2	10	20	2	14
RGDKSVYYTSNPTTF	AGAGGTGATAAATCGGTCTACTATACTAGTAACCCTACTACATTT	0	RGDKSVYYTSNPTTF	0	0	1	33	2	5	122	2	15	163	1	14	72	1	10	22	16	23	58	23	28	0	20	0	106	4	36	22	15	28	72	2	32	56	10	61
GDKSVYYTSNPTTFH	GGCGATAAATCCGTGTATTATACGTCTAACCCAACTACTTTTCAT	0	GDKSVYYTSNPTTFH	0	0	1	26	36	56	86	40	132	129	23	111	56	1	57	23	23	25	65	17	51	3	19	1	86	7	51	34	24	63	64	1	48	74	10	61
DKSVYYTSNPTTFHL	GACAAGTCCGTTTATTATACAAGTAACCCGACTACGTTCCATTTA	0	DKSVYYTSNPTTFHL	0	1	0	24	10	10	39	14	26	53	3	24	24	1	19	12	18	15	34	19	11	1	20	0	43	5	19	16	14	27	43	1	12	54	4	19
KSVYYTSNPTTFHLD	AAAAGCGTATATTACACTTCGAACCCTACAACCTTTCACCTTGAT	0	KSVYYTSNPTTFHLD	0	0	0	24	0	6	50	1	28	66	0	23	16	0	3	22	27	14	43	7	56	3	19	1	51	2	29	26	10	73	25	0	20	45	3	52
SVYYTSNPTTFHLDG	TCCGTATACTATACTAGTAACCCAACCACATTCCACCTTGATGGA	0	SVYYTSNPTTFHLDG	0	0	0	1	0	3	5	0	3	5	1	0	1	0	0	8	8	10	19	2	4	2	9	1	25	0	4	9	5	13	13	0	2	16	4	14
VYYTSNPTTFHLDGE	GTTTACTACACTTCAAACCCAACAACCTTCCATCTGGACGGTGAA	0	VYYTSNPTTFHLDGE	0	0	0	8	0	0	18	0	0	12	0	0	0	0	0	16	24	19	30	5	1	1	18	0	25	0	0	11	0	2	9	0	0	15	1	0
YYTSNPTTFHLDGEV	TACTATACTAGCAACCCCACTACCTTTCATTTAGACGGTGAGGTA	0	YYTSNPTTFHLDGEV	2	0	1	13	0	1	57	0	2	93	1	1	56	0	0	24	23	22	57	10	23	4	18	0	94	0	7	19	1	21	93	1	1	52	5	3
YTSNPTTFHLDGEVI	TACACATCCAATCCCACCACATTCCATTTAGATGGGGAGGTGATA	0	YTSNPTTFHLDGEVI	0	0	0	12	0	0	60	0	0	71	0	0	77	1	0	8	12	16	48	4	3	2	13	0	92	1	6	14	2	23	91	0	0	47	1	4
TSNPTTFHLDGEVIT	ACCAGTAATCCTACCACTTTCCATTTGGATGGTGAAGTGATAACT	0	TSNPTTFHLDGEVIT	0	0	0	3	0	0	6	0	0	5	0	0	3	0	0	3	3	4	22	0	0	0	3	0	25	0	0	3	0	0	21	0	0	14	1	0
SNPTTFHLDGEVITF	TCTAATCCAACAACATTCCATTTAGATGGCGAGGTTATAACTTTC	0	SNPTTFHLDGEVITF	0	0	0	28	2	0	53	0	1	74	0	0	78	1	3	15	12	14	27	9	15	1	20	1	52	2	2	15	4	32	66	0	0	27	4	5
NPTTFHLDGEVITFD	AATCCAACAACTTTCCATCTGGATGGAGAAGTTATTACATTTGAT	0	NPTTFHLDGEVITFD	0	0	0	24	1	2	57	0	1	85	0	0	68	0	0	14	21	14	44	3	20	2	14	0	75	0	3	19	16	28	70	0	1	41	4	8
PTTFHLDGEVITFDN	CCTACCACCTTCCACTTAGATGGAGAAGTAATAACTTTTGATAAT	0	PTTFHLDGEVITFDN	0	0	0	4	2	4	9	0	9	14	0	8	5	0	7	11	12	13	11	3	27	4	11	0	18	1	10	11	6	29	9	1	10	10	0	24
TTFHLDGEVITFDNL	ACTACGTTTCATCTTGATGGAGAGGTTATAACTTTTGATAACTTG	0	TTFHLDGEVITFDNL	0	0	0	11	26	27	47	63	120	75	33	154	71	10	213	20	28	21	60	42	95	2	22	0	96	30	135	22	26	55	92	19	170	43	29	51
TFHLDGEVITFDNLK	ACATTTCATTTGGATGGTGAAGTAATTACGTTTGATAATCTTAAG	0	TFHLDGEVITFDNLK	0	0	1	32	43	32	76	78	85	136	96	82	98	102	139	17	27	13	51	56	73	3	16	1	98	32	87	10	19	23	104	33	110	43	31	18
FHLDGEVITFDNLKT	TTTCACTTGGATGGTGAAGTTATTACTTTTGATAATTTAAAAACA	0	FHLDGEVITFDNLKT	0	0	0	6	19	13	16	32	49	13	50	64	2	24	79	14	14	7	17	29	29	5	13	0	25	28	70	13	19	14	10	39	82	27	40	30
HLDGEVITFDNLKTL	CATCTAGACGGCGAAGTGATTACCTTCGATAATCTGAAGACTTTA	0	HLDGEVITFDNLKTL	0	0	2	23	50	26	75	143	81	155	237	101	105	317	138	22	33	16	52	109	145	3	22	1	103	108	220	15	27	42	97	168	276	43	71	63
LDGEVITFDNLKTLL	TTAGATGGAGAAGTTATAACTTTCGACAACTTAAAAACTTTATTA	0	LDGEVITFDNLKTLL	1	0	0	5	15	18	34	38	56	50	45	61	29	30	77	9	15	7	26	77	58	3	7	0	59	75	98	13	16	20	33	110	112	25	46	30
DGEVITFDNLKTLLS	GATGGTGAAGTTATTACCTTTGATAACCTAAAGACTTTACTAAGT	0	DGEVITFDNLKTLLS	2	0	0	27	50	29	83	92	67	152	176	90	141	142	126	11	24	23	51	125	82	4	20	1	81	122	119	13	39	47	93	148	152	36	81	53
GEVITFDNLKTLLSL	GGAGAAGTAATTACATTTGATAACTTAAAAACCTTGTTATCCTTG	0	GEVITFDNLKTLLSL	1	0	0	21	39	21	66	109	52	125	203	71	103	189	106	17	25	13	44	160	116	4	18	1	84	148	210	19	35	47	94	272	269	30	89	42
EVITFDNLKTLLSLR	GAAGTTATCACTTTTGACAATTTGAAAACACTATTGAGTTTGCGT	0	EVITFDNLKTLLSLR	0	0	3	45	48	26	147	118	83	267	220	95	234	266	190	14	26	18	64	152	127	1	6	0	121	198	178	8	33	39	168	314	294	40	101	32
VITFDNLKTLLSLRE	GTCATTACGTTTGATAACCTAAAGACGTTATTGTCATTAAGAGAA	0	VITFDNLKTLLSLRE	0	0	0	16	30	25	40	44	79	57	64	71	35	54	94	25	28	23	72	47	70	2	18	1	55	36	100	25	12	46	63	48	134	44	29	35
ITFDNLKTLLSLREV	ATTACCTTTGATAACTTAAAAACGCTGTTGAGTTTGAGGGAGGTC	0	ITFDNLKTLLSLREV	1	0	0	16	43	22	50	86	89	104	172	107	79	150	157	15	12	10	50	77	102	1	12	0	84	119	184	15	25	40	72	161	201	22	56	43
TFDNLKTLLSLREVR	ACTTTCGATAACCTTAAGACCTTATTATCCCTACGTGAAGTTAGA	0	TFDNLKTLLSLREVR	0	0	0	11	14	8	14	12	20	8	3	10	1	3	10	27	33	32	30	60	14	10	24	1	17	22	12	29	30	25	5	22	4	15	28	10
FDNLKTLLSLREVRT	TTTGACAATTTGAAGACCTTGCTTTCCTTACGAGAGGTAAGGACT	0	FDNLKTLLSLREVRT	0	0	0	22	31	3	47	88	5	30	85	4	16	40	1	20	20	15	39	59	30	4	28	1	24	31	18	17	30	36	16	27	13	26	31	24
DNLKTLLSLREVRTI	GATAATCTAAAAACTCTATTGTCTCTAAGAGAAGTTAGGACTATA	0	DNLKTLLSLREVRTI	0	0	1	20	53	31	51	95	61	48	154	56	19	148	70	11	30	10	32	123	94	5	18	0	38	129	119	15	25	41	25	186	143	40	62	60
NLKTLLSLREVRTIK	AACCTAAAAACATTACTGAGCTTGAGAGAAGTGAGAACCATTAAG	0	NLKTLLSLREVRTIK	1	0	0	0	18	32	1	20	25	0	13	7	0	4	1	21	25	10	3	20	8	4	28	1	4	6	1	6	10	7	2	2	1	0	5	2
LKTLLSLREVRTIKV	TTAAAAACATTATTATCACTTAGAGAGGTAAGGACGATCAAGGTT	0	LKTLLSLREVRTIKV	0	0	0	0	0	0	0	0	0	0	0	0	0	0	0	16	22	21	5	3	0	12	25	0	1	0	0	4	0	0	0	0	0	2	0	0
KTLLSLREVRTIKVF	AAAACCCTATTGTCGCTAAGGGAAGTTAGAACTATTAAGGTCTTT	0	KTLLSLREVRTIKVF	0	0	0	21	52	23	45	102	51	29	90	60	1	59	54	20	22	19	46	58	64	7	25	0	34	46	96	23	21	47	11	44	126	21	58	53
TLLSLREVRTIKVFT	ACTCTACTATCTTTGAGAGAAGTCAGAACTATAAAAGTTTTTACA	0	TLLSLREVRTIKVFT	0	0	0	0	11	0	0	21	5	0	8	2	0	12	0	3	9	7	6	18	9	1	6	1	4	11	5	9	1	5	0	1	3	4	5	3
LLSLREVRTIKVFTT	TTGTTGTCCCTAAGAGAGGTCAGAACTATTAAGGTATTTACAACT	0	LLSLREVRTIKVFTT	0	0	0	3	7	5	1	4	19	1	1	2	0	0	6	11	18	13	1	17	17	5	10	0	0	3	14	1	3	18	0	1	2	0	4	9
LSLREVRTIKVFTTV	TTATCACTGAGAGAAGTACGTACAATAAAAGTTTTTACTACTGTT	0	LSLREVRTIKVFTTV	0	0	0	4	27	24	3	40	76	5	47	56	0	15	40	10	18	13	20	38	29	7	12	0	11	17	43	20	28	28	2	14	47	6	31	35
SLREVRTIKVFTTVD	AGTTTGCGTGAAGTCAGAACTATTAAAGTGTTCACTACTGTCGAT	0	SLREVRTIKVFTTVD	0	0	0	6	52	45	22	80	99	17	91	96	0	69	101	31	33	26	37	79	82	13	32	0	16	59	116	29	48	95	8	38	107	33	49	106
LREVRTIKVFTTVDN	CTGAGAGAAGTTCGTACCATTAAAGTCTTTACTACTGTAGATAAT	0	LREVRTIKVFTTVDN	0	0	1	7	44	27	17	80	44	12	50	46	0	18	37	21	23	11	42	33	26	6	21	2	18	17	43	21	20	33	7	21	18	23	19	37
REVRTIKVFTTVDNI	CGGGAAGTGAGAACAATTAAAGTTTTTACGACTGTGGACAATATA	0	REVRTIKVFTTVDNI	0	0	0	8	9	23	22	19	34	29	14	60	11	7	47	17	20	10	24	61	27	6	13	2	21	41	34	19	31	14	14	29	34	20	24	17
EVRTIKVFTTVDNIN	GAAGTCAGAACGATTAAGGTTTTCACCACTGTTGATAACATAAAT	0	EVRTIKVFTTVDNIN	0	0	0	24	35	29	45	86	84	43	88	97	18	69	102	17	11	14	31	70	64	2	12	0	37	57	69	26	31	41	25	51	65	37	51	57
VRTIKVFTTVDNINL	GTTAGAACGATCAAGGTGTTTACTACAGTTGACAACATTAATTTG	0	VRTIKVFTTVDNINL	0	0	0	3	11	5	1	12	7	0	2	0	0	2	0	20	27	11	6	3	13	8	9	0	4	3	4	4	3	27	0	0	1	1	4	8
RTIKVFTTVDNINLH	AGAACAATTAAAGTCTTTACTACCGTCGACAACATAAATTTGCAC	0	RTIKVFTTVDNINLH	0	0	0	1	26	10	1	64	32	1	45	34	1	24	16	11	14	15	19	46	36	7	12	0	11	36	34	21	17	25	4	36	28	13	34	38
TIKVFTTVDNINLHT	ACGATTAAGGTTTTCACGACGGTAGATAATATTAATCTTCATACT	0	TIKVFTTVDNINLHT	0	0	0	0	8	29	0	16	54	2	13	44	1	3	25	14	14	8	29	40	29	9	20	0	10	20	12	22	33	20	4	20	8	16	42	16
IKVFTTVDNINLHTQ	ATAAAGGTCTTCACTACAGTTGATAATATCAACTTGCATACACAG	0	IKVFTTVDNINLHTQ	0	0	0	6	3	0	3	1	0	2	0	0	0	0	0	20	17	27	12	0	25	5	18	1	7	0	3	8	1	19	0	1	0	2	0	2
KVFTTVDNINLHTQV	AAAGTTTTTACTACAGTGGATAATATAAATTTGCACACGCAAGTC	0	KVFTTVDNINLHTQV	0	0	0	0	0	1	0	1	6	0	0	1	0	0	2	12	9	7	11	15	13	0	11	0	5	1	8	16	7	19	0	1	0	15	7	4
VFTTVDNINLHTQVV	GTTTTCACTACAGTAGACAACATCAATTTACATACCCAAGTTGTG	0	VFTTVDNINLHTQVV	0	0	0	1	2	14	0	5	16	1	3	14	1	0	2	21	18	22	23	34	26	5	23	0	10	4	17	29	26	35	0	0	12	10	11	31
FTTVDNINLHTQVVD	TTTACGACCGTGGACAACATAAACTTGCACACTCAAGTTGTTGAT	0	FTTVDNINLHTQVVD	0	0	0	1	2	1	2	1	3	0	0	4	0	0	3	4	2	3	2	1	3	5	5	0	0	0	2	1	1	3	0	0	1	1	0	0
TTVDNINLHTQVVDM	ACTACTGTTGATAACATAAACCTCCATACTCAAGTCGTTGACATG	0	TTVDNINLHTQVVDM	0	1	0	2	5	26	0	4	64	0	0	50	1	0	14	15	39	29	17	38	64	15	29	3	2	2	61	16	35	83	1	2	52	3	5	80
TVDNINLHTQVVDMS	ACAGTTGACAATATTAATTTACACACCCAAGTCGTTGACATGTCC	0	TVDNINLHTQVVDMS	0	0	0	0	0	5	0	0	20	0	0	20	0	0	2	11	10	7	9	12	35	2	8	0	5	6	26	11	8	37	0	10	18	2	6	38
VDNINLHTQVVDMSM	GTTGACAATATTAATTTGCATACCCAAGTTGTCGATATGTCCATG	0	VDNINLHTQVVDMSM	0	0	0	7	3	38	26	7	102	36	4	74	4	1	14	13	34	25	35	30	73	9	20	1	26	9	52	22	21	65	6	2	41	22	7	71
DNINLHTQVVDMSMT	GACAATATCAATTTGCACACACAGGTAGTAGACATGTCCATGACT	0	DNINLHTQVVDMSMT	1	0	0	4	26	43	9	54	121	8	46	129	0	51	109	18	36	18	40	47	106	4	24	0	21	21	109	41	31	89	8	3	102	24	20	87
NINLHTQVVDMSMTY	AACATAAATCTGCATACCCAAGTGGTGGACATGTCAATGACCTAC	0	NINLHTQVVDMSMTY	0	0	0	5	46	25	15	89	83	19	108	77	5	112	92	24	37	28	59	81	101	9	23	1	54	53	127	16	31	53	26	49	162	51	36	86
INLHTQVVDMSMTYG	ATTAATCTACATACACAAGTTGTGGATATGAGCATGACATATGGT	0	INLHTQVVDMSMTYG	1	0	0	4	8	33	8	11	80	6	4	58	1	2	62	18	29	24	33	42	55	5	16	0	16	32	77	33	26	48	5	15	71	25	25	82
NLHTQVVDMSMTYGQ	AATTTACACACCCAAGTAGTTGATATGTCCATGACCTATGGTCAG	0	NLHTQVVDMSMTYGQ	0	1	1	5	21	21	29	43	75	28	71	77	9	74	66	15	21	10	24	63	74	3	12	1	31	65	105	27	27	48	12	50	93	30	41	82
LHTQVVDMSMTYGQQ	TTACACACACAAGTGGTGGACATGTCCATGACATACGGTCAACAG	0	LHTQVVDMSMTYGQQ	0	1	1	16	48	13	72	130	61	69	149	57	29	158	74	16	16	20	34	82	58	1	14	0	53	76	67	15	18	31	43	89	74	52	43	40
HTQVVDMSMTYGQQF	CATACCCAGGTTGTGGATATGTCTATGACGTACGGTCAGCAATTT	0	HTQVVDMSMTYGQQF	0	2	0	12	61	26	36	138	72	54	192	67	26	253	93	30	31	31	65	152	104	3	26	1	94	155	167	21	41	65	64	185	199	68	103	99
TQVVDMSMTYGQQFG	ACTCAAGTCGTTGACATGTCAATGACATATGGTCAACAATTTGGG	0	TQVVDMSMTYGQQFG	0	0	0	14	21	31	38	87	114	74	178	120	67	165	200	12	19	17	46	67	83	4	4	0	85	48	175	15	16	33	85	76	204	59	40	55
QVVDMSMTYGQQFGP	CAGGTAGTTGATATGTCTATGACTTATGGCCAACAATTCGGTCCT	0	QVVDMSMTYGQQFGP	0	0	0	18	11	21	72	45	86	127	63	95	90	56	167	6	15	13	49	59	53	0	13	0	58	53	75	13	20	20	56	83	75	36	37	49
VVDMSMTYGQQFGPT	GTTGTTGATATGTCCATGACCTATGGGCAACAATTCGGCCCTACC	0	VVDMSMTYGQQFGPT	0	0	0	0	11	3	3	7	41	3	8	30	1	4	24	4	5	4	11	13	0	0	2	0	19	6	1	6	22	1	13	5	0	14	4	2
VDMSMTYGQQFGPTY	GTCGATATGAGCATGACTTATGGTCAGCAGTTTGGCCCAACTTAC	0	VDMSMTYGQQFGPTY	0	0	0	2	7	0	1	4	1	2	1	2	1	2	0	23	24	18	28	22	25	3	12	0	15	6	12	39	21	47	2	1	4	20	9	21
DMSMTYGQQFGPTYL	GACATGTCCATGACTTACGGACAACAATTTGGACCAACATATTTG	0	DMSMTYGQQFGPTYL	0	0	0	8	0	0	9	0	0	11	0	0	1	0	0	17	25	16	26	12	2	8	11	0	13	1	0	33	5	5	0	0	0	17	1	1
MSMTYGQQFGPTYLD	ATGAGCATGACGTATGGTCAACAATTCGGACCGACCTATCTGGAT	0	MSMTYGQQFGPTYLD	0	0	0	0	0	0	0	0	0	0	0	0	0	0	0	16	14	8	11	5	3	3	10	0	3	0	0	10	0	18	1	0	0	4	0	0
SMTYGQQFGPTYLDG	TCAATGACTTACGGTCAACAATTCGGTCCCACGTACTTAGATGGT	0	SMTYGQQFGPTYLDG	0	0	1	0	0	0	0	0	0	0	0	1	0	0	1	18	30	17	24	8	6	3	22	1	2	0	3	22	7	26	1	0	4	5	1	0
MTYGQQFGPTYLDGA	ATGACTTATGGTCAACAATTCGGGCCTACCTATTTGGATGGTGCT	0	MTYGQQFGPTYLDGA	0	0	0	5	4	5	3	0	4	1	0	0	0	0	0	30	36	31	20	16	0	18	21	0	3	1	0	20	10	0	2	0	0	8	3	0
TYGQQFGPTYLDGAD	ACTTACGGTCAACAGTTTGGGCCTACCTACTTAGACGGGGCAGAC	0	TYGQQFGPTYLDGAD	0	0	0	0	0	2	1	0	3	0	0	0	0	0	3	7	8	9	11	1	3	5	6	0	3	0	1	10	7	3	2	0	0	2	0	0
YGQQFGPTYLDGADV	TATGGACAACAATTTGGCCCAACTTACCTGGATGGAGCTGACGTA	0	YGQQFGPTYLDGADV	0	0	0	11	0	0	11	0	0	7	0	0	0	0	1	10	23	19	23	14	4	7	18	2	10	1	2	12	7	11	2	0	0	2	0	2
GQQFGPTYLDGADVT	GGCCAGCAGTTCGGTCCGACCTACCTTGATGGCGCAGATGTGACT	0	GQQFGPTYLDGADVT	0	1	0	2	0	4	3	0	25	0	0	10	0	0	2	10	8	15	17	9	4	7	15	0	1	0	1	13	5	8	0	0	0	5	1	1
QQFGPTYLDGADVTK	CAGCAATTTGGTCCTACCTATCTAGATGGTGCCGATGTCACAAAA	0	QQFGPTYLDGADVTK	0	0	0	0	1	9	0	0	12	0	5	7	0	0	1	33	24	23	20	12	30	14	25	2	5	2	18	18	13	80	1	1	7	4	0	23
QFGPTYLDGADVTKI	CAATTTGGGCCCACTTACTTAGATGGTGCAGATGTTACTAAAATT	0	QFGPTYLDGADVTKI	0	0	0	3	0	0	2	0	1	0	0	0	0	0	0	21	25	10	9	9	18	11	22	0	1	0	2	12	5	31	1	0	0	5	2	3
FGPTYLDGADVTKIK	TTTGGTCCTACTTATTTGGATGGTGCGGACGTTACAAAAATTAAG	0	FGPTYLDGADVTKIK	0	0	0	0	0	0	0	0	0	0	0	0	0	0	0	0	0	0	0	0	0	0	0	0	0	0	0	0	0	0	0	0	0	0	0	0
GPTYLDGADVTKIKP	GGTCCAACCTACCTAGACGGAGCTGATGTAACCAAAATAAAGCCA	0	GPTYLDGADVTKIKP	0	0	0	0	0	0	4	0	0	1	0	0	0	0	0	18	10	10	14	2	9	10	12	0	5	1	2	10	5	29	1	0	0	1	1	2
PTYLDGADVTKIKPH	CCCACGTATCTAGACGGCGCGGATGTCACTAAAATTAAGCCACAT	0	PTYLDGADVTKIKPH	0	0	0	0	0	0	0	0	0	0	0	0	0	0	0	8	12	14	5	5	0	5	5	1	1	0	0	3	5	0	1	0	0	0	0	0
TYLDGADVTKIKPHN	ACATATTTGGATGGTGCAGATGTTACCAAGATTAAGCCACACAAT	0	TYLDGADVTKIKPHN	0	0	0	1	6	0	1	4	0	0	1	0	0	0	0	13	14	11	12	9	16	11	8	0	1	4	1	16	9	24	3	2	0	3	4	2
YLDGADVTKIKPHNS	TACTTAGATGGTGCAGATGTCACAAAAATTAAACCACACAATAGT	0	YLDGADVTKIKPHNS	0	0	1	0	11	19	0	35	36	0	37	25	1	35	9	16	18	11	16	60	44	2	12	0	4	59	46	5	17	100	1	51	18	4	52	71
LDGADVTKIKPHNSH	CTGGACGGAGCTGATGTGACAAAAATTAAACCTCATAATTCACAT	0	LDGADVTKIKPHNSH	0	0	1	0	24	11	0	59	31	0	141	22	1	245	16	10	10	11	13	149	19	9	12	0	3	127	20	9	17	34	2	271	13	7	40	26
DGADVTKIKPHNSHE	GATGGTGCAGATGTCACAAAAATAAAACCGCATAATTCGCATGAG	0	DGADVTKIKPHNSHE	0	0	0	3	25	11	2	71	8	8	97	10	2	190	8	16	15	16	9	135	25	3	13	0	10	142	18	5	30	29	1	250	7	11	64	26
GADVTKIKPHNSHEG	GGTGCAGACGTTACAAAAATTAAACCCCATAATTCGCATGAAGGT	0	GADVTKIKPHNSHEG	0	1	0	0	73	5	1	162	19	1	425	25	4	586	17	22	30	17	17	194	42	11	20	2	6	195	52	17	32	51	5	351	22	6	81	59
ADVTKIKPHNSHEGK	GCTGATGTTACTAAGATTAAGCCTCATAATTCCCATGAAGGTAAG	0	ADVTKIKPHNSHEGK	0	0	0	0	57	22	0	161	42	2	384	36	5	744	13	16	27	25	12	221	53	9	7	0	6	309	92	19	11	45	10	570	91	8	57	46
DVTKIKPHNSHEGKT	GATGTCACTAAAATTAAACCACATAACTCCCATGAAGGAAAAACT	0	DVTKIKPHNSHEGKT	0	1	0	0	98	20	2	222	55	0	484	64	2	797	33	22	17	15	19	277	37	21	15	0	12	394	24	11	28	28	11	718	35	12	78	19
VTKIKPHNSHEGKTF	GTTACCAAAATTAAGCCTCATAATAGTCATGAAGGTAAGACTTTC	0	VTKIKPHNSHEGKTF	0	0	0	0	29	14	0	97	33	0	170	27	1	267	11	19	23	22	5	161	11	10	10	1	2	182	22	5	26	26	0	373	16	6	46	14
TKIKPHNSHEGKTFY	ACGAAAATTAAACCGCACAACTCCCATGAAGGCAAAACCTTTTAT	0	TKIKPHNSHEGKTFY	0	0	1	0	83	11	0	213	36	3	379	31	9	886	25	18	17	14	15	233	62	11	10	0	10	330	87	9	15	45	7	748	72	10	55	75
KIKPHNSHEGKTFYV	AAGATAAAGCCACATAACTCTCACGAGGGAAAAACCTTCTATGTG	0	KIKPHNSHEGKTFYV	0	0	1	3	54	24	6	165	45	7	366	36	0	765	18	17	20	24	22	298	37	7	13	2	6	381	32	20	15	38	5	746	29	8	62	29
IKPHNSHEGKTFYVL	ATTAAGCCACATAATTCTCATGAAGGTAAGACATTCTACGTTCTG	0	IKPHNSHEGKTFYVL	1	0	0	0	36	1	0	67	3	0	77	2	0	78	0	11	19	21	22	130	16	16	33	1	8	97	3	21	25	36	4	138	0	9	60	15
KPHNSHEGKTFYVLP	AAGCCTCACAACTCGCACGAGGGTAAAACCTTTTATGTTCTACCG	0	KPHNSHEGKTFYVLP	0	0	0	0	0	0	0	0	0	0	0	0	0	0	0	4	7	6	9	7	0	4	3	0	1	0	5	3	5	0	0	0	1	3	0	1
PHNSHEGKTFYVLPN	CCCCATAACAGCCATGAAGGAAAAACTTTTTACGTGTTACCCAAC	0	PHNSHEGKTFYVLPN	0	0	0	7	0	1	25	0	1	47	0	1	13	0	2	4	4	5	17	12	24	2	10	1	25	4	13	7	3	46	21	2	12	18	6	19
HNSHEGKTFYVLPND	CACAACAGTCACGAAGGTAAGACTTTTTATGTGTTGCCCAATGAC	0	HNSHEGKTFYVLPND	0	0	0	17	6	9	63	8	16	86	7	13	69	4	3	16	28	21	46	31	19	3	14	1	86	7	20	14	13	29	73	8	16	30	9	23
NSHEGKTFYVLPNDD	AACAGCCACGAAGGTAAAACCTTCTACGTTCTACCCAATGATGAT	0	NSHEGKTFYVLPNDD	0	1	0	11	0	13	35	1	22	49	1	21	34	0	8	18	31	21	50	48	22	4	22	1	57	7	9	23	29	52	46	0	5	53	7	6
SHEGKTFYVLPNDDT	TCCCATGAGGGAAAGACTTTTTACGTGTTACCTAATGATGACACG	0	SHEGKTFYVLPNDDT	0	0	1	12	0	4	42	0	11	45	0	7	16	0	5	4	18	13	33	25	27	2	15	0	28	4	12	17	21	25	20	2	4	35	8	9
HEGKTFYVLPNDDTL	CATGAAGGGAAAACGTTCTACGTCTTACCAAACGATGACACTTTA	0	HEGKTFYVLPNDDTL	0	0	1	19	0	21	63	3	56	90	0	54	64	0	50	17	25	21	53	22	34	2	18	1	81	8	29	10	23	49	79	6	10	39	12	21
EGKTFYVLPNDDTLR	GAAGGTAAGACTTTTTACGTTTTACCTAACGACGATACTTTGAGA	0	EGKTFYVLPNDDTLR	0	0	2	20	0	25	86	0	50	193	1	34	149	0	11	22	37	40	71	43	45	2	19	1	118	2	15	21	21	98	104	2	5	58	11	25
GKTFYVLPNDDTLRV	GGTAAAACGTTCTACGTTTTACCAAATGATGATACTTTGAGAGTT	0	GKTFYVLPNDDTLRV	0	0	0	11	2	8	25	9	7	50	2	5	30	1	1	13	20	14	31	7	39	1	15	0	75	0	20	10	5	98	75	2	9	19	3	30
KTFYVLPNDDTLRVE	AAAACCTTTTACGTTTTGCCAAACGACGATACTTTGAGAGTTGAA	0	KTFYVLPNDDTLRVE	0	1	0	21	0	12	73	1	21	131	0	6	120	0	1	16	29	16	45	8	33	2	35	0	98	2	15	16	7	46	101	0	5	39	2	10
TFYVLPNDDTLRVEA	ACCTTCTATGTCTTACCAAATGACGACACCTTAAGAGTCGAAGCA	0	TFYVLPNDDTLRVEA	0	0	0	6	0	2	51	0	8	74	0	5	56	0	2	18	21	15	53	12	31	1	20	1	109	3	9	17	14	53	110	6	2	47	2	9
FYVLPNDDTLRVEAF	TTTTACGTATTACCAAACGATGACACTTTGAGAGTGGAAGCCTTC	0	FYVLPNDDTLRVEAF	0	0	0	0	0	0	0	0	1	0	0	0	0	0	0	6	16	11	10	2	5	5	12	0	4	1	0	18	1	9	1	0	0	3	0	4
YVLPNDDTLRVEAFE	TACGTTTTACCAAACGATGACACCTTGAGAGTCGAAGCCTTTGAG	0	YVLPNDDTLRVEAFE	0	0	0	0	0	1	0	0	2	0	0	2	0	0	0	22	23	10	9	8	8	10	19	1	4	0	1	15	5	21	0	1	0	4	4	7
VLPNDDTLRVEAFEY	GTCTTACCAAACGATGATACCCTGCGTGTTGAGGCCTTCGAATAC	0	VLPNDDTLRVEAFEY	0	0	0	2	0	0	1	0	0	1	0	0	1	0	0	21	25	31	19	11	12	3	23	0	4	0	2	14	8	25	1	0	2	3	1	2
LPNDDTLRVEAFEYY	TTGCCTAACGATGATACGCTCAGGGTCGAAGCTTTCGAATACTAT	0	LPNDDTLRVEAFEYY	0	0	0	3	8	10	5	3	31	2	0	14	1	0	4	23	20	12	23	23	31	18	15	0	7	1	9	19	25	43	0	0	0	5	3	5
PNDDTLRVEAFEYYH	CCAAACGACGATACTCTTAGAGTTGAAGCCTTTGAATATTACCAC	0	PNDDTLRVEAFEYYH	0	0	0	4	2	6	7	0	1	0	0	2	1	0	0	11	14	13	15	10	10	16	20	1	4	1	2	10	10	31	0	0	1	0	1	11
NDDTLRVEAFEYYHT	AATGACGATACTCTGCGTGTCGAAGCTTTTGAGTACTATCACACT	0	NDDTLRVEAFEYYHT	0	0	0	4	0	2	11	0	1	7	0	1	4	0	1	14	13	20	25	24	19	7	18	1	6	7	11	23	4	56	2	2	3	9	9	13
DDTLRVEAFEYYHTT	GACGACACATTGCGCGTTGAAGCATTCGAATATTACCACACTACT	0	DDTLRVEAFEYYHTT	0	0	0	5	18	4	6	16	5	2	6	1	0	1	0	23	32	29	24	37	26	7	25	1	7	9	11	29	25	50	3	3	4	24	13	10
DTLRVEAFEYYHTTD	GATACCCTCAGGGTTGAAGCATTTGAATATTATCATACAACGGAC	0	DTLRVEAFEYYHTTD	0	0	0	1	0	0	0	1	0	0	0	0	0	0	0	14	13	6	15	7	8	2	6	1	4	1	4	9	3	22	1	0	0	3	0	7
TLRVEAFEYYHTTDP	ACGCTGCGAGTAGAAGCATTCGAATACTATCATACAACGGATCCC	0	TLRVEAFEYYHTTDP	0	0	0	0	0	0	0	0	0	0	0	0	0	0	0	0	0	0	1	0	0	1	2	0	0	0	0	0	0	0	0	0	0	0	0	0
LRVEAFEYYHTTDPS	CTGAGAGTCGAAGCTTTTGAGTACTATCACACAACAGATCCTTCT	0	LRVEAFEYYHTTDPS	0	0	0	10	0	1	8	0	2	1	0	1	1	0	0	15	12	12	16	13	1	10	16	0	4	2	6	14	7	2	1	2	1	3	1	3
RVEAFEYYHTTDPSF	CGGGTCGAAGCTTTCGAATACTACCATACCACGGATCCATCCTTT	0	RVEAFEYYHTTDPSF	0	0	0	0	0	0	0	0	0	0	0	0	0	0	0	0	0	0	1	0	0	1	0	0	0	0	0	1	0	0	0	0	0	0	0	0
VEAFEYYHTTDPSFL	GTCGAAGCTTTTGAATATTATCACACCACTGACCCCTCCTTTCTA	0	VEAFEYYHTTDPSFL	0	0	0	5	0	0	12	0	0	12	0	0	4	0	0	17	15	11	15	11	1	9	14	0	9	0	1	16	1	0	0	0	1	13	0	0
EAFEYYHTTDPSFLG	GAAGCCTTCGAATATTATCATACAACTGATCCTTCATTTCTTGGC	0	EAFEYYHTTDPSFLG	0	0	0	4	0	0	5	0	1	4	0	0	1	0	0	9	6	6	10	5	3	0	5	0	5	0	0	9	0	6	0	0	0	4	2	0
AFEYYHTTDPSFLGR	GCATTTGAATACTATCATACCACTGATCCCTCATTTTTAGGCAGA	0	AFEYYHTTDPSFLGR	0	0	0	0	0	1	0	0	2	0	0	1	0	0	0	10	3	13	22	6	4	6	14	1	6	0	2	16	2	3	9	0	3	16	0	2
FEYYHTTDPSFLGRY	TTTGAATATTATCATACAACCGATCCTTCGTTTCTTGGTAGATAT	0	FEYYHTTDPSFLGRY	0	0	0	0	0	4	0	0	13	0	0	6	1	0	2	8	20	9	20	9	8	3	11	1	15	1	2	19	1	31	5	0	0	18	0	4
EYYHTTDPSFLGRYM	GAATACTACCATACTACTGATCCTTCTTTTCTCGGAAGATATATG	0	EYYHTTDPSFLGRYM	0	0	0	4	0	1	16	0	5	8	0	1	1	0	0	9	19	19	33	9	12	4	16	1	13	3	2	21	5	16	5	0	1	25	1	2
YYHTTDPSFLGRYMS	TATTACCACACTACTGATCCCAGTTTCCTCGGGAGATATATGTCT	0	YYHTTDPSFLGRYMS	0	1	0	2	0	1	2	0	2	0	0	0	0	0	1	14	15	11	15	31	3	13	8	1	4	2	0	20	15	3	1	1	0	21	7	1
YHTTDPSFLGRYMSA	TACCATACTACCGACCCGTCATTCTTGGGGAGATACATGTCAGCT	0	YHTTDPSFLGRYMSA	0	0	0	0	0	1	0	0	1	0	0	0	0	0	0	19	19	21	18	14	22	4	17	1	6	1	2	9	6	33	5	1	2	8	3	10
HTTDPSFLGRYMSAL	CACACTACGGATCCATCTTTCCTAGGAAGATACATGTCCGCTCTT	0	HTTDPSFLGRYMSAL	0	0	0	0	0	0	0	0	0	0	0	0	0	0	0	4	0	1	3	8	2	0	2	0	0	1	1	0	10	2	0	1	1	0	5	0
TTDPSFLGRYMSALN	ACAACTGACCCGTCCTTCTTGGGCAGATACATGTCCGCACTGAAT	0	TTDPSFLGRYMSALN	0	0	1	19	8	9	74	8	19	106	11	16	95	3	3	33	41	37	63	85	53	7	32	0	132	18	20	28	56	70	125	12	19	66	21	49
TDPSFLGRYMSALNH	ACGGATCCGTCATTCTTAGGAAGGTACATGTCAGCATTAAATCAC	0	TDPSFLGRYMSALNH	0	0	0	0	1	2	0	10	1	0	16	1	0	8	0	5	6	6	8	18	2	0	4	0	13	15	0	2	10	11	11	6	1	3	6	1
DPSFLGRYMSALNHT	GATCCTAGCTTCTTGGGACGATATATGAGTGCACTAAATCACACA	0	DPSFLGRYMSALNHT	0	0	0	0	0	1	0	0	10	0	0	4	0	0	3	10	21	12	21	24	14	8	20	0	2	4	2	11	14	19	2	0	2	1	5	6
PSFLGRYMSALNHTK	CCGAGTTTCTTGGGCAGATATATGTCTGCCCTTAATCACACTAAG	0	PSFLGRYMSALNHTK	0	0	0	0	0	2	0	0	2	0	0	1	0	0	0	16	18	19	5	21	17	7	10	1	1	2	3	11	16	27	0	0	1	2	7	12
SFLGRYMSALNHTKK	TCTTTTCTTGGCAGGTACATGTCCGCTTTAAATCACACTAAGAAA	0	SFLGRYMSALNHTKK	0	0	0	0	0	0	0	0	0	0	0	0	0	0	0	23	12	14	1	0	0	4	14	1	0	0	0	2	1	0	0	0	0	1	0	0
FLGRYMSALNHTKKW	TTTCTTGGCAGGTATATGTCAGCCTTAAACCATACTAAAAAGTGG	0	FLGRYMSALNHTKKW	0	0	0	0	0	0	0	0	0	0	0	0	0	0	0	15	17	13	3	2	9	2	9	0	0	1	5	1	2	4	1	0	4	0	1	2
LGRYMSALNHTKKWK	TTAGGACGTTACATGTCGGCTTTGAATCACACAAAGAAGTGGAAA	0	LGRYMSALNHTKKWK	0	0	0	0	0	14	4	0	15	3	0	7	1	0	7	22	22	16	2	1	2	20	21	0	0	0	0	3	0	4	0	0	0	4	0	3
GRYMSALNHTKKWKY	GGCAGATATATGAGTGCACTTAATCATACAAAGAAATGGAAATAC	0	GRYMSALNHTKKWKY	0	0	0	0	0	0	0	0	0	0	0	0	0	1	1	5	14	14	3	8	11	8	13	0	0	1	2	6	2	11	0	0	0	1	1	3
RYMSALNHTKKWKYP	AGGTATATGTCAGCATTGAACCATACGAAAAAGTGGAAATATCCA	0	RYMSALNHTKKWKYP	0	0	0	5	0	2	3	0	8	0	0	2	0	0	0	8	33	14	7	18	0	11	21	0	10	6	1	11	20	0	3	1	0	2	5	0
YMSALNHTKKWKYPQ	TACATGTCAGCCCTGAATCATACGAAAAAGTGGAAATATCCTCAG	0	YMSALNHTKKWKYPQ	0	0	0	0	3	0	0	3	0	0	3	1	0	1	0	16	19	19	5	0	4	12	22	3	2	0	2	0	3	7	2	0	1	0	0	0
MSALNHTKKWKYPQV	ATGAGCGCCTTGAATCATACTAAGAAGTGGAAATACCCACAAGTG	0	MSALNHTKKWKYPQV	0	0	0	0	0	1	0	0	0	0	0	0	0	0	0	9	5	9	1	1	3	7	4	0	0	1	0	3	0	1	1	0	0	0	0	0
SALNHTKKWKYPQVN	TCTGCTCTGAACCACACGAAGAAGTGGAAATATCCACAAGTTAAC	0	SALNHTKKWKYPQVN	0	0	0	0	0	0	0	0	0	0	0	0	0	0	0	5	10	6	3	6	1	8	9	0	2	1	0	2	5	6	0	0	0	2	0	0
ALNHTKKWKYPQVNG	GCTTTGAATCATACAAAGAAATGGAAGTACCCACAAGTTAATGGG	0	ALNHTKKWKYPQVNG	0	0	0	0	0	0	0	0	0	0	0	0	0	0	0	15	18	14	3	2	2	6	16	0	0	2	1	1	1	0	1	0	0	1	0	0
LNHTKKWKYPQVNGL	CTGAATCATACTAAAAAGTGGAAATACCCACAAGTAAATGGATTG	0	LNHTKKWKYPQVNGL	0	0	0	0	0	0	0	0	3	0	0	0	0	0	0	13	12	16	3	2	1	6	15	1	0	0	0	13	0	8	0	1	0	0	0	0
NHTKKWKYPQVNGLT	AATCATACGAAGAAGTGGAAATACCCTCAAGTAAATGGTCTGACA	0	NHTKKWKYPQVNGLT	1	0	0	0	3	2	0	4	2	0	1	0	0	0	0	25	20	10	6	9	9	8	21	1	1	4	0	12	18	20	2	1	0	1	3	3
HTKKWKYPQVNGLTS	CACACAAAAAAATGGAAATACCCCCAAGTCAACGGTCTAACGTCC	0	HTKKWKYPQVNGLTS	0	0	0	0	0	2	0	0	1	0	0	0	0	0	0	9	12	7	4	6	0	1	10	0	0	1	1	1	8	4	0	0	0	1	0	0
TKKWKYPQVNGLTSI	ACTAAGAAATGGAAGTACCCACAAGTTAACGGTCTAACTTCAATT	0	TKKWKYPQVNGLTSI	0	0	0	0	7	45	0	25	116	0	1	118	1	7	98	28	31	24	24	60	73	12	22	4	7	34	72	26	45	62	3	15	100	7	36	98
KKWKYPQVNGLTSIK	AAGAAGTGGAAATACCCTCAAGTAAACGGCTTGACTTCAATCAAG	0	KKWKYPQVNGLTSIK	1	0	0	0	23	24	1	43	67	0	34	67	0	11	55	25	20	20	13	56	63	16	22	1	4	20	88	15	26	55	4	26	79	9	30	84
KWKYPQVNGLTSIKW	AAATGGAAATACCCCCAGGTCAATGGTTTGACTTCCATCAAGTGG	0	KWKYPQVNGLTSIKW	0	0	0	0	1	8	1	0	28	2	0	21	0	1	13	10	11	15	12	31	34	8	17	0	1	2	26	9	16	51	0	1	12	2	6	34
WKYPQVNGLTSIKWA	TGGAAATATCCACAAGTAAATGGTCTAACGTCAATAAAGTGGGCC	0	WKYPQVNGLTSIKWA	0	0	0	0	0	13	0	0	22	0	0	20	0	0	5	11	7	6	2	10	26	3	4	0	0	6	25	3	7	23	0	0	10	2	0	33
KYPQVNGLTSIKWAD	AAATATCCACAAGTGAATGGCCTAACTTCCATTAAATGGGCTGAC	0	KYPQVNGLTSIKWAD	0	0	0	2	4	14	3	3	40	0	0	38	0	0	13	19	15	12	16	37	24	10	18	0	3	1	30	13	28	35	1	1	19	4	10	49
YPQVNGLTSIKWADN	TACCCCCAAGTAAATGGTCTGACGTCTATTAAGTGGGCTGATAAC	0	YPQVNGLTSIKWADN	0	0	0	12	28	39	17	52	74	31	43	89	5	12	87	20	14	20	49	46	101	2	23	0	44	19	154	20	23	54	29	23	183	55	29	88
PQVNGLTSIKWADNN	CCACAGGTCAACGGGTTAACGAGCATTAAGTGGGCAGACAACAAT	0	PQVNGLTSIKWADNN	0	0	0	27	13	26	86	29	76	177	42	87	150	50	167	19	22	13	66	86	151	2	16	0	65	84	193	18	24	62	74	115	255	43	51	77
QVNGLTSIKWADNNC	CAAGTCAATGGACTTACTAGCATTAAATGGGCAGACAATAATTGT	0	QVNGLTSIKWADNNC	1	0	1	39	70	50	110	210	126	139	256	163	121	275	280	30	22	31	68	113	146	2	19	1	124	136	239	24	39	46	136	166	320	62	74	85
VNGLTSIKWADNNCY	GTTAACGGTTTGACATCTATAAAGTGGGCCGATAACAATTGCTAC	0	VNGLTSIKWADNNCY	0	0	0	0	43	6	11	83	29	14	124	33	5	142	43	24	13	11	37	91	70	4	16	0	31	93	81	27	32	44	8	124	71	30	46	63
NGLTSIKWADNNCYL	AACGGGTTGACTTCAATAAAATGGGCTGATAACAACTGCTACTTA	0	NGLTSIKWADNNCYL	0	0	1	12	23	29	28	36	93	23	61	88	12	68	76	26	29	26	45	105	100	7	22	0	26	113	122	29	40	82	18	144	144	24	90	124
GLTSIKWADNNCYLA	GGATTAACATCCATAAAATGGGCAGACAATAACTGCTATTTGGCA	0	GLTSIKWADNNCYLA	1	0	0	0	31	11	0	72	29	0	82	52	0	77	63	9	10	13	28	87	62	3	9	0	31	50	90	16	24	43	9	69	90	24	54	65
LTSIKWADNNCYLAT	CTTACATCCATTAAGTGGGCTGACAACAACTGCTACTTGGCAACG	0	LTSIKWADNNCYLAT	0	0	0	2	24	2	14	83	5	12	98	15	6	107	5	13	15	12	28	29	47	3	7	0	29	24	39	9	13	25	8	38	37	24	14	24
TSIKWADNNCYLATA	ACAAGCATTAAGTGGGCTGACAATAATTGTTACTTGGCCACTGCT	0	TSIKWADNNCYLATA	0	0	0	2	7	11	15	12	37	16	14	35	14	14	41	9	10	17	20	39	37	3	8	0	29	38	47	9	12	24	24	41	46	30	23	43
SIKWADNNCYLATAL	TCTATCAAGTGGGCCGATAATAACTGCTACCTTGCCACAGCATTA	0	SIKWADNNCYLATAL	0	1	0	9	40	9	16	69	17	17	102	32	41	242	90	18	18	16	45	63	95	2	13	4	59	59	143	29	23	52	84	123	190	63	65	97
IKWADNNCYLATALL	ATCAAATGGGCAGATAATAATTGCTACTTAGCAACCGCTCTGTTA	0	IKWADNNCYLATALL	0	0	0	5	16	2	6	17	2	3	6	0	1	3	0	20	32	8	26	23	21	3	21	1	28	17	5	15	11	20	12	4	2	19	5	11
KWADNNCYLATALLT	AAGTGGGCAGATAATAATTGTTATCTCGCAACGGCACTGCTAACT	0	KWADNNCYLATALLT	0	0	1	8	10	11	44	26	7	82	17	7	32	6	3	5	7	5	22	33	20	1	8	0	23	12	11	11	21	36	24	9	3	28	18	11
WADNNCYLATALLTL	TGGGCTGATAACAATTGCTATTTGGCAACAGCGTTGTTAACGTTA	0	WADNNCYLATALLTL	1	0	1	24	4	27	33	10	71	15	7	45	5	0	28	25	31	31	42	63	56	4	22	0	16	24	46	38	36	95	4	24	29	25	28	75
ADNNCYLATALLTLQ	GCAGATAACAATTGCTACTTGGCTACGGCTTTGCTAACCTTGCAG	0	ADNNCYLATALLTLQ	0	1	0	1	13	22	18	17	65	12	10	73	6	7	45	31	29	34	69	71	89	14	20	0	20	37	60	44	46	120	6	23	52	34	49	58
DNNCYLATALLTLQQ	GACAACAACTGTTATTTGGCCACCGCTCTTTTAACTCTGCAACAG	0	DNNCYLATALLTLQQ	0	0	0	3	0	4	4	0	19	6	0	18	1	0	25	6	8	5	9	22	23	1	3	0	5	6	25	6	11	24	4	9	31	7	10	15
NNCYLATALLTLQQI	AATAACTGCTATTTGGCTACTGCCTTGCTAACATTGCAACAAATA	0	NNCYLATALLTLQQI	0	0	0	12	20	20	15	49	56	14	33	70	4	34	106	26	22	16	38	133	102	6	32	1	16	83	113	18	50	58	5	79	125	21	52	51
NCYLATALLTLQQIE	AACTGTTATCTTGCTACGGCTTTATTAACCCTTCAGCAGATAGAG	0	NCYLATALLTLQQIE	2	0	2	3	22	23	8	28	108	6	27	104	2	12	119	24	29	26	29	56	83	10	29	0	24	34	100	31	32	68	4	28	99	30	33	77
CYLATALLTLQQIEL	TGCTACTTGGCGACCGCTTTATTAACATTGCAACAAATTGAACTT	0	CYLATALLTLQQIEL	0	0	0	2	0	0	0	0	0	0	0	0	0	1	0	19	24	18	2	3	0	11	20	0	0	0	0	1	0	0	0	0	0	0	0	0
YLATALLTLQQIELK	TACTTGGCTACTGCGTTGTTGACCTTGCAACAGATTGAATTAAAA	0	YLATALLTLQQIELK	0	0	0	1	11	15	2	3	20	2	1	9	0	0	2	13	16	10	5	14	25	5	11	0	2	3	8	5	10	19	0	2	0	1	0	10
LATALLTLQQIELKF	CTAGCAACCGCCTTGTTGACTTTACAGCAAATAGAACTGAAATTT	0	LATALLTLQQIELKF	0	0	0	1	0	9	0	0	2	0	1	1	0	0	0	21	24	14	6	4	14	8	19	1	0	0	4	4	2	19	0	0	1	3	0	4
ATALLTLQQIELKFN	GCTACAGCTTTATTAACCCTTCAACAGATCGAATTGAAATTTAAT	0	ATALLTLQQIELKFN	0	0	0	2	6	1	0	9	4	0	2	1	0	1	0	11	10	18	8	7	3	9	15	0	0	3	1	5	4	5	0	2	0	1	1	2
TALLTLQQIELKFNP	ACAGCTCTGCTAACATTACAACAAATTGAACTAAAATTTAATCCC	0	TALLTLQQIELKFNP	0	0	1	3	1	2	0	7	12	0	1	4	0	0	0	13	11	6	8	9	0	7	8	2	1	3	0	3	3	4	0	1	2	1	5	1
ALLTLQQIELKFNPP	GCACTATTAACGTTACAACAGATTGAACTCAAATTCAACCCTCCA	0	ALLTLQQIELKFNPP	0	0	0	0	2	0	0	5	0	0	0	0	0	0	0	16	20	16	3	0	1	3	25	0	0	0	0	1	2	0	0	0	0	1	0	0
LLTLQQIELKFNPPA	CTTCTTACATTGCAACAAATAGAATTGAAATTCAATCCGCCTGCA	0	LLTLQQIELKFNPPA	0	0	0	0	0	0	0	0	0	0	0	0	0	0	0	6	5	4	0	2	0	3	3	0	0	0	0	0	1	0	0	0	0	0	0	0
LTLQQIELKFNPPAL	TTGACATTGCAACAAATCGAATTAAAATTTAATCCTCCAGCCCTA	0	LTLQQIELKFNPPAL	0	0	0	1	67	9	4	99	16	3	163	26	4	211	14	11	16	9	20	63	26	4	11	0	7	72	33	12	12	25	5	135	17	12	37	32
TLQQIELKFNPPALQ	ACTTTGCAACAGATTGAGTTAAAATTTAATCCACCAGCCCTTCAA	0	TLQQIELKFNPPALQ	0	0	0	1	37	0	0	59	5	0	132	5	2	195	7	8	12	6	18	69	24	5	8	1	8	90	32	6	7	10	2	139	55	11	32	21
LQQIELKFNPPALQD	TTACAACAAATTGAATTGAAATTTAATCCGCCTGCGTTACAAGAT	0	LQQIELKFNPPALQD	0	0	1	1	36	8	6	103	65	7	175	54	2	232	87	12	17	5	20	177	76	2	12	0	14	175	158	20	17	38	3	362	178	19	50	46
QQIELKFNPPALQDA	CAACAAATTGAATTGAAGTTCAATCCCCCGGCACTACAAGACGCT	0	QQIELKFNPPALQDA	0	0	1	6	67	22	6	165	89	9	309	122	5	492	150	19	17	7	17	115	53	3	8	0	12	136	80	18	15	25	9	283	94	21	40	49
QIELKFNPPALQDAY	CAAATCGAATTAAAGTTTAATCCTCCTGCGTTACAAGATGCTTAC	0	QIELKFNPPALQDAY	0	0	1	2	38	36	2	90	62	8	186	80	1	257	86	19	15	5	29	110	103	3	9	0	19	167	166	23	10	60	13	269	172	24	36	81
IELKFNPPALQDAYY	ATAGAACTAAAATTCAACCCACCCGCCTTGCAGGATGCTTATTAC	0	IELKFNPPALQDAYY	0	0	0	0	20	5	4	44	11	0	63	2	0	69	3	16	20	7	26	96	37	3	10	0	13	104	13	19	24	47	3	112	7	14	59	17
ELKFNPPALQDAYYR	GAACTGAAATTTAACCCTCCTGCTTTGCAAGACGCCTATTATCGT	0	ELKFNPPALQDAYYR	1	0	0	12	9	2	27	17	9	46	10	3	21	1	0	23	24	31	85	85	79	4	17	1	136	38	48	26	59	151	134	19	15	105	38	70
LKFNPPALQDAYYRA	TTAAAATTCAATCCTCCTGCCCTGCAAGACGCCTATTATAGAGCT	0	LKFNPPALQDAYYRA	0	0	0	2	3	3	6	0	5	7	0	2	1	0	0	15	18	18	16	23	19	11	23	0	7	1	7	17	18	43	2	1	0	6	6	11
KFNPPALQDAYYRAR	AAATTCAACCCTCCCGCTTTACAAGACGCGTATTATCGTGCTAGA	0	KFNPPALQDAYYRAR	0	0	0	2	0	6	0	0	4	0	0	3	1	0	0	21	35	27	34	4	13	7	18	0	4	0	6	16	7	33	2	0	1	10	1	4
FNPPALQDAYYRARA	TTTAATCCTCCAGCACTGCAGGATGCATATTATAGAGCCAGAGCA	0	FNPPALQDAYYRARA	0	0	0	0	0	0	0	0	0	0	0	0	0	1	0	9	16	11	13	7	6	2	7	0	4	0	0	17	7	4	5	0	0	4	3	1
NPPALQDAYYRARAG	AACCCGCCTGCTCTACAAGATGCTTACTACCGAGCTAGAGCAGGT	0	NPPALQDAYYRARAG	0	0	0	0	0	2	0	0	1	0	0	0	0	0	0	8	13	14	11	8	3	3	6	0	2	2	1	12	8	12	1	0	0	8	1	1
PPALQDAYYRARAGE	CCACCCGCTCTGCAAGACGCTTACTATCGAGCTAGAGCAGGAGAA	0	PPALQDAYYRARAGE	0	0	0	0	0	1	1	0	1	5	0	0	2	0	0	5	5	6	4	2	0	5	6	1	2	0	2	4	1	3	2	0	0	0	0	1
PALQDAYYRARAGEA	CCTGCGTTACAAGACGCATATTATAGAGCAAGAGCGGGTGAAGCT	0	PALQDAYYRARAGEA	0	0	0	0	4	0	2	2	0	4	4	0	2	2	0	21	31	24	20	4	3	5	19	0	5	0	3	12	4	9	1	0	1	10	1	6
ALQDAYYRARAGEAA	GCTCTGCAAGATGCGTATTATAGAGCAAGAGCAGGAGAAGCCGCG	0	ALQDAYYRARAGEAA	0	0	0	4	0	0	9	0	0	3	0	0	0	0	0	10	7	7	8	0	0	4	10	0	11	0	0	12	0	0	1	0	0	6	0	0
LQDAYYRARAGEAAN	TTACAAGACGCCTATTATAGAGCTAGGGCCGGAGAAGCAGCTAAT	0	LQDAYYRARAGEAAN	0	0	0	2	0	0	5	0	0	0	0	0	0	0	0	10	12	4	3	0	0	5	3	0	1	0	0	2	0	0	0	0	0	1	0	0
QDAYYRARAGEAANF	CAAGACGCTTATTACAGGGCCCGTGCGGGCGAGGCCGCCAATTTC	0	QDAYYRARAGEAANF	0	0	0	16	4	0	44	2	0	88	2	0	99	0	2	22	23	17	32	8	5	0	13	1	68	1	3	5	9	10	100	0	0	19	5	0
DAYYRARAGEAANFC	GATGCGTATTATCGGGCGAGAGCAGGTGAAGCAGCAAATTTTTGT	0	DAYYRARAGEAANFC	0	0	0	46	1	14	122	1	14	273	1	7	248	0	1	24	26	26	76	25	15	1	25	2	155	3	12	13	14	20	170	2	5	43	13	11
AYYRARAGEAANFCA	GCATACTACAGGGCGAGAGCTGGCGAAGCAGCTAATTTTTGTGCT	0	AYYRARAGEAANFCA	0	0	1	14	1	1	26	0	1	28	0	0	4	0	0	18	27	21	38	9	10	5	20	0	28	0	0	28	1	10	11	0	0	22	1	0
YYRARAGEAANFCAL	TACTACCGCGCTAGAGCTGGTGAAGCCGCGAACTTTTGTGCCCTT	0	YYRARAGEAANFCAL	0	0	0	9	51	17	39	85	39	40	100	29	14	101	14	21	25	30	56	169	58	6	15	0	66	104	42	26	45	59	51	149	19	58	58	39
YRARAGEAANFCALI	TATAGAGCGCGTGCAGGTGAAGCTGCAAACTTCTGCGCTTTAATA	0	YRARAGEAANFCALI	0	0	0	8	16	14	21	26	31	6	27	18	2	13	12	15	23	12	14	65	13	9	9	0	8	40	4	15	36	31	1	23	4	8	31	17
RARAGEAANFCALIL	AGAGCCAGAGCAGGTGAAGCCGCCAACTTCTGCGCTTTAATTTTG	0	RARAGEAANFCALIL	0	0	0	9	16	9	13	8	15	6	3	5	0	5	0	16	17	18	17	10	7	5	17	2	5	3	9	8	7	34	3	0	0	7	2	8
ARAGEAANFCALILA	GCCAGAGCAGGCGAAGCCGCTAACTTTTGCGCTCTAATCCTGGCT	0	ARAGEAANFCALILA	1	0	0	11	2	5	17	1	12	9	0	11	2	0	3	11	28	24	17	40	33	6	11	0	7	16	14	15	14	71	5	8	7	10	9	21
RAGEAANFCALILAY	AGGGCTGGTGAAGCAGCCAATTTTTGCGCCTTAATTTTAGCTTAT	0	RAGEAANFCALILAY	0	0	0	1	8	6	1	10	6	0	10	5	0	2	2	13	22	17	20	25	17	7	15	2	4	9	8	15	16	46	0	2	6	12	5	10
AGEAANFCALILAYC	GCTGGTGAAGCCGCTAATTTTTGTGCTTTGATCCTTGCATACTGT	0	AGEAANFCALILAYC	1	0	0	6	2	24	7	7	45	4	3	27	0	1	5	22	32	15	20	25	31	12	18	3	4	9	8	22	21	33	0	6	7	3	5	11
GEAANFCALILAYCN	GGTGAAGCCGCTAATTTCTGTGCATTAATTTTAGCATATTGCAAC	0	GEAANFCALILAYCN	0	0	0	1	14	11	1	33	17	0	29	14	0	20	11	12	12	11	31	39	24	3	9	1	12	19	14	17	21	20	6	16	7	25	23	21
EAANFCALILAYCNK	GAAGCCGCCAACTTTTGCGCTTTAATTCTAGCCTACTGTAATAAA	0	EAANFCALILAYCNK	0	0	0	2	0	2	0	0	1	0	0	0	0	0	0	6	11	7	3	3	0	5	2	2	1	0	0	2	2	0	1	0	0	2	0	0
AANFCALILAYCNKT	GCAGCAAATTTCTGTGCTTTAATATTAGCGTATTGTAATAAAACT	0	AANFCALILAYCNKT	0	0	0	0	0	0	0	0	0	0	0	0	0	0	0	16	24	11	1	0	0	3	16	1	1	0	1	2	0	0	2	0	0	0	0	0
ANFCALILAYCNKTV	GCCAACTTCTGCGCACTTATCTTGGCTTACTGTAATAAAACGGTA	0	ANFCALILAYCNKTV	0	0	0	0	0	0	0	0	0	0	0	0	1	0	0	10	9	10	2	0	0	2	8	1	0	0	0	0	0	0	0	0	0	1	0	0
NFCALILAYCNKTVG	AACTTCTGTGCTCTAATTCTAGCTTATTGCAACAAAACAGTCGGT	0	NFCALILAYCNKTVG	0	0	0	2	5	3	1	4	2	3	3	0	2	1	0	21	24	21	5	8	2	16	18	1	1	0	3	1	2	11	0	2	6	0	1	5
FCALILAYCNKTVGE	TTTTGTGCTCTCATCCTGGCTTATTGTAATAAAACAGTAGGTGAG	0	FCALILAYCNKTVGE	0	0	0	0	0	3	1	0	8	1	0	4	0	0	5	8	26	19	3	0	2	11	18	0	1	0	0	0	0	0	0	0	0	0	0	1
CALILAYCNKTVGEL	TGTGCTTTAATTCTTGCCTATTGTAACAAAACCGTTGGCGAATTA	0	CALILAYCNKTVGEL	0	0	0	5	1	0	3	1	0	0	1	0	1	0	0	20	28	23	1	0	0	11	10	1	0	0	0	1	0	0	0	0	0	0	0	0
ALILAYCNKTVGELG	GCACTTATTCTAGCATACTGTAACAAAACCGTGGGCGAGCTGGGT	0	ALILAYCNKTVGELG	0	0	0	0	0	5	0	0	0	0	0	0	0	0	0	13	32	17	2	0	0	7	12	1	1	0	0	1	0	0	0	0	0	1	0	0
LILAYCNKTVGELGD	TTGATACTAGCATACTGCAACAAAACTGTAGGGGAATTGGGTGAT	0	LILAYCNKTVGELGD	0	0	0	0	0	0	0	0	0	0	0	0	0	0	0	19	35	29	1	3	2	18	18	0	0	1	0	1	2	0	0	0	0	1	0	0
ILAYCNKTVGELGDV	ATCTTAGCATACTGCAATAAGACAGTAGGTGAGTTGGGCGACGTT	0	ILAYCNKTVGELGDV	0	0	0	0	0	0	0	0	0	0	0	0	0	0	0	15	27	22	0	4	7	9	15	0	0	0	2	1	1	4	0	0	3	3	0	0
LAYCNKTVGELGDVR	TTGGCTTATTGCAACAAGACTGTTGGAGAACTTGGAGATGTAAGG	0	LAYCNKTVGELGDVR	0	0	0	0	1	20	0	0	48	0	0	41	1	0	4	22	13	22	12	10	6	13	13	3	1	2	9	20	10	25	0	0	1	2	0	12
AYCNKTVGELGDVRE	GCATATTGCAACAAGACAGTGGGCGAACTAGGTGATGTGAGAGAA	0	AYCNKTVGELGDVRE	0	0	0	4	1	2	6	1	1	7	0	0	1	0	0	22	27	35	21	12	5	14	18	0	16	2	1	28	6	22	1	0	0	10	1	1
YCNKTVGELGDVRET	TATTGTAACAAAACTGTTGGTGAATTGGGTGATGTGCGTGAAACA	0	YCNKTVGELGDVRET	0	0	0	5	0	2	7	0	6	8	0	2	1	0	1	25	26	23	29	6	7	10	16	0	6	2	1	12	9	11	0	1	0	7	1	1
CNKTVGELGDVRETM	TGTAATAAAACCGTTGGTGAATTGGGTGACGTTAGAGAAACTATG	0	CNKTVGELGDVRETM	0	0	0	10	0	3	16	1	1	6	0	1	1	0	0	28	24	23	22	22	18	8	27	1	5	0	4	14	17	34	0	0	1	7	5	6
NKTVGELGDVRETMS	AATAAAACGGTAGGAGAACTCGGCGACGTGAGAGAGACAATGAGT	0	NKTVGELGDVRETMS	0	0	0	0	14	16	4	15	57	2	4	41	0	0	10	26	33	26	41	31	37	17	13	0	6	3	31	31	30	70	2	0	25	10	9	35
KTVGELGDVRETMSY	AAGACCGTGGGAGAGCTAGGGGATGTAAGAGAGACTATGAGTTAC	0	KTVGELGDVRETMSY	0	0	0	17	32	18	28	72	59	20	60	43	6	36	22	17	33	23	44	56	52	9	18	0	22	33	41	27	29	71	8	21	29	37	37	72
TVGELGDVRETMSYL	ACGGTTGGCGAGTTAGGTGATGTTAGAGAAACCATGTCGTACTTA	0	TVGELGDVRETMSYL	0	0	0	6	7	12	43	20	47	38	31	36	13	19	25	15	22	18	76	45	28	3	10	2	65	45	34	40	23	26	47	30	27	86	30	43
VGELGDVRETMSYLF	GTTGGAGAACTCGGGGATGTAAGAGAAACAATGTCATACCTATTT	0	VGELGDVRETMSYLF	0	0	0	9	13	22	6	5	51	4	2	29	0	1	7	22	21	20	27	20	17	6	17	1	9	11	13	28	17	29	7	4	3	16	12	14
GELGDVRETMSYLFQ	GGTGAATTGGGCGATGTGCGAGAGACAATGAGTTACTTATTTCAA	0	GELGDVRETMSYLFQ	0	0	0	1	21	27	0	20	46	0	11	27	0	5	6	10	35	27	39	89	34	5	22	1	17	13	29	28	36	57	0	10	7	23	19	46
ELGDVRETMSYLFQH	GAGCTGGGGGATGTCAGAGAAACAATGTCTTACCTTTTTCAACAC	0	ELGDVRETMSYLFQH	0	1	0	1	15	10	4	42	15	1	33	25	1	14	10	23	20	19	32	64	23	10	10	0	11	21	25	33	35	26	1	34	5	17	42	31
LGDVRETMSYLFQHA	TTGGGGGATGTTCGCGAAACGATGTCTTACTTATTCCAACATGCT	0	LGDVRETMSYLFQHA	0	0	0	9	24	13	18	54	37	14	62	34	2	25	11	9	18	17	27	59	23	3	19	1	14	32	9	27	23	40	8	20	5	26	28	27
GDVRETMSYLFQHAN	GGTGATGTAAGAGAAACCATGTCTTACCTATTTCAGCATGCCAAT	0	GDVRETMSYLFQHAN	0	0	0	18	17	4	64	37	9	131	51	0	124	59	0	13	16	16	29	72	8	3	8	0	63	74	6	9	27	13	75	111	5	30	63	14
DVRETMSYLFQHANL	GATGTCCGTGAGACAATGAGTTACCTTTTCCAACACGCTAATTTG	0	DVRETMSYLFQHANL	0	0	2	24	48	21	62	159	50	131	173	42	113	241	35	23	27	22	69	126	100	1	15	3	118	100	144	17	51	96	127	182	117	51	93	128
VRETMSYLFQHANLD	GTGAGAGAGACAATGTCCTATTTGTTTCAACATGCTAACCTTGAT	0	VRETMSYLFQHANLD	0	0	0	1	0	0	1	0	0	2	0	0	1	0	0	17	33	23	2	3	0	20	23	0	1	2	0	4	2	1	0	0	0	0	1	0
RETMSYLFQHANLDS	AGGGAAACAATGTCTTACCTATTCCAACATGCAAATCTGGATTCA	0	RETMSYLFQHANLDS	0	0	0	14	61	3	48	125	4	83	149	12	78	101	2	12	17	16	49	49	35	0	17	0	73	49	21	10	22	58	79	40	13	48	56	33
ETMSYLFQHANLDSC	GAGACTATGTCATATTTGTTTCAGCATGCTAATTTGGATTCATGT	0	ETMSYLFQHANLDSC	0	0	0	17	13	25	69	32	58	82	69	92	71	74	89	6	14	12	39	79	80	3	11	0	56	84	90	13	18	43	62	124	123	39	51	85
TMSYLFQHANLDSCK	ACAATGTCCTATTTGTTTCAGCATGCAAATCTTGACAGTTGTAAA	0	TMSYLFQHANLDSCK	1	0	0	12	4	15	8	8	18	3	0	4	0	0	5	19	11	17	9	20	2	7	17	0	5	4	4	10	17	1	0	3	0	3	2	1
MSYLFQHANLDSCKR	ATGTCTTATCTCTTTCAGCATGCAAATCTCGACAGTTGTAAAAGA	0	MSYLFQHANLDSCKR	0	0	0	1	0	1	1	0	0	0	1	0	0	0	0	17	22	21	3	0	4	12	12	1	1	0	2	0	0	0	0	0	2	0	0	0
SYLFQHANLDSCKRV	TCTTATTTATTTCAACATGCAAATCTAGATAGTTGTAAGAGAGTT	0	SYLFQHANLDSCKRV	0	0	0	18	31	7	50	51	14	75	59	14	35	26	2	10	21	8	37	66	37	1	4	2	24	48	24	13	13	19	23	38	19	23	18	27
YLFQHANLDSCKRVL	TACTTGTTTCAGCACGCTAATCTAGATTCTTGCAAAAGAGTGTTA	0	YLFQHANLDSCKRVL	0	0	1	31	50	24	65	128	54	64	187	57	24	162	55	26	19	19	42	131	84	1	15	0	45	112	64	27	41	56	18	137	45	34	65	41
LFQHANLDSCKRVLN	TTATTTCAGCACGCAAACCTTGATAGTTGTAAAAGAGTGTTAAAT	0	LFQHANLDSCKRVLN	0	0	0	7	41	9	11	109	22	12	101	13	5	85	13	14	28	16	12	103	16	11	20	0	10	92	3	20	40	34	2	75	2	5	51	8
FQHANLDSCKRVLNV	TTCCAACATGCGAATCTGGATTCCTGTAAAAGAGTTCTAAACGTA	0	FQHANLDSCKRVLNV	0	0	0	15	49	8	25	75	14	12	74	9	5	45	1	19	21	15	34	63	57	7	22	0	20	43	30	17	29	69	8	34	24	16	45	56
QHANLDSCKRVLNVV	CAACACGCCAACCTAGACTCATGCAAGCGTGTGCTCAATGTAGTG	0	QHANLDSCKRVLNVV	1	0	0	5	22	4	13	36	23	5	49	21	3	34	4	27	26	41	32	53	35	14	19	3	14	27	23	24	36	61	2	29	16	10	23	26
HANLDSCKRVLNVVC	CATGCTAATTTGGATAGCTGTAAAAGAGTACTTAATGTGGTATGT	0	HANLDSCKRVLNVVC	0	0	0	12	10	14	24	16	19	5	15	30	5	2	14	18	24	22	25	34	44	12	31	0	20	20	52	28	19	65	8	17	59	13	30	50
ANLDSCKRVLNVVCK	GCCAACTTGGACAGCTGCAAGCGTGTGTTGAACGTAGTCTGTAAA	0	ANLDSCKRVLNVVCK	0	0	0	5	16	16	1	21	38	0	32	53	1	22	33	15	13	20	10	26	41	7	11	0	6	19	42	6	27	44	0	13	19	5	10	16
NLDSCKRVLNVVCKT	AATCTAGATAGTTGTAAAAGAGTTTTGAATGTTGTCTGTAAAACA	0	NLDSCKRVLNVVCKT	0	0	0	1	25	21	0	32	31	0	20	24	0	5	12	16	22	13	16	29	39	5	16	1	10	29	16	12	22	53	0	19	17	15	22	35
LDSCKRVLNVVCKTC	CTGGACTCTTGTAAACGTGTTCTGAATGTAGTATGCAAAACATGT	0	LDSCKRVLNVVCKTC	0	0	0	0	0	0	0	0	0	0	0	0	0	0	0	14	22	16	0	4	0	13	25	1	2	1	1	1	3	2	1	0	0	2	2	2
DSCKRVLNVVCKTCG	GACTCATGCAAGCGTGTTCTAAACGTTGTGTGTAAAACTTGTGGT	0	DSCKRVLNVVCKTCG	0	0	0	11	18	11	16	29	16	22	14	7	6	1	2	26	36	30	9	29	19	13	25	4	5	7	14	11	43	35	0	9	8	3	17	7
SCKRVLNVVCKTCGQ	TCGTGTAAGAGAGTACTAAACGTGGTATGTAAGACCTGTGGACAA	0	SCKRVLNVVCKTCGQ	0	0	0	3	0	1	5	0	2	1	0	0	2	0	0	19	23	22	2	1	2	6	20	2	1	0	2	1	0	6	0	0	0	3	0	1
CKRVLNVVCKTCGQQ	TGTAAAAGGGTGTTGAACGTTGTGTGCAAAACATGCGGTCAGCAA	0	CKRVLNVVCKTCGQQ	0	0	0	0	0	2	0	0	3	0	0	2	0	1	1	14	35	29	3	4	1	28	10	1	1	0	0	1	0	0	1	0	0	0	0	0
KRVLNVVCKTCGQQQ	AAACGGGTCCTAAACGTTGTATGCAAAACTTGTGGCCAGCAACAA	0	KRVLNVVCKTCGQQQ	0	0	0	0	1	1	0	4	0	0	2	1	0	1	0	6	6	8	0	7	0	2	2	0	0	1	0	0	4	0	0	1	0	0	1	1
RVLNVVCKTCGQQQT	CGTGTGTTAAACGTCGTATGTAAGACCTGTGGTCAGCAGCAAACA	0	RVLNVVCKTCGQQQT	0	0	0	0	0	13	0	0	21	0	0	10	2	0	3	13	23	17	4	12	3	22	20	1	0	4	9	13	9	3	1	2	5	2	5	7
VLNVVCKTCGQQQTT	GTGCTTAATGTTGTTTGTAAGACATGCGGACAACAACAGACCACC	0	VLNVVCKTCGQQQTT	0	0	0	0	0	0	0	0	0	0	0	0	0	0	0	0	1	0	0	0	0	0	0	0	0	0	0	0	0	0	0	0	0	0	0	0
LNVVCKTCGQQQTTL	TTAAATGTAGTGTGCAAAACGTGTGGCCAGCAACAAACTACGCTC	0	LNVVCKTCGQQQTTL	0	0	0	0	7	1	0	9	6	0	8	1	0	4	1	12	14	14	13	23	24	12	12	1	3	13	8	9	8	37	1	15	2	4	15	11
NVVCKTCGQQQTTLK	AATGTTGTTTGTAAAACATGCGGCCAACAGCAAACAACATTAAAA	0	NVVCKTCGQQQTTLK	0	0	0	0	5	2	4	21	2	0	11	4	0	9	0	19	17	16	13	24	18	6	13	0	2	9	12	14	9	24	3	2	3	4	12	11
VVCKTCGQQQTTLKG	GTCGTGTGTAAAACTTGCGGCCAGCAGCAAACCACATTGAAGGGT	0	VVCKTCGQQQTTLKG	0	0	0	0	2	0	1	4	0	0	3	0	0	0	0	7	6	5	2	3	0	0	6	0	0	1	0	4	3	0	0	1	0	0	3	0
VCKTCGQQQTTLKGV	GTCTGTAAAACTTGTGGTCAACAACAGACCACTCTGAAAGGCGTC	0	VCKTCGQQQTTLKGV	0	0	0	0	4	0	3	6	0	0	3	0	0	5	0	11	11	5	21	21	24	5	8	1	6	16	9	6	7	24	3	4	1	10	10	13
CKTCGQQQTTLKGVE	TGTAAGACTTGCGGTCAACAGCAAACTACTCTTAAAGGTGTAGAG	0	CKTCGQQQTTLKGVE	0	0	0	7	27	5	7	29	2	5	28	7	1	10	0	17	28	23	19	37	51	7	17	0	2	21	26	22	19	74	0	9	9	13	25	48
KTCGQQQTTLKGVEA	AAAACGTGCGGTCAACAACAGACCACTCTTAAAGGAGTGGAGGCG	0	KTCGQQQTTLKGVEA	0	0	0	2	1	8	6	4	27	1	2	17	2	1	0	10	17	11	13	15	23	3	13	0	1	1	12	10	7	55	0	2	3	1	2	24
TCGQQQTTLKGVEAV	ACTTGTGGCCAACAACAAACTACCCTTAAGGGGGTTGAAGCAGTA	0	TCGQQQTTLKGVEAV	2	0	0	2	21	19	13	22	54	6	13	54	1	8	42	27	26	10	34	30	59	8	22	1	10	9	58	31	38	65	7	4	65	19	17	43
CGQQQTTLKGVEAVM	TGTGGGCAACAACAAACGACCTTGAAAGGCGTAGAAGCAGTCATG	0	CGQQQTTLKGVEAVM	0	0	0	14	13	22	21	20	79	21	7	80	4	4	73	31	42	38	57	90	81	8	37	0	35	23	103	43	52	97	9	14	103	43	34	95
GQQQTTLKGVEAVMY	GGGCAACAACAAACAACATTAAAGGGGGTGGAAGCCGTCATGTAT	0	GQQQTTLKGVEAVMY	0	0	0	3	0	6	2	0	12	0	0	10	0	0	2	16	22	17	21	17	31	14	11	1	3	3	22	10	17	91	1	2	14	4	2	29
QQQTTLKGVEAVMYM	CAGCAGCAAACTACGTTAAAGGGTGTTGAGGCTGTTATGTACATG	0	QQQTTLKGVEAVMYM	0	0	0	1	0	4	0	0	9	1	0	4	2	0	0	21	26	14	17	11	3	7	16	1	0	1	2	6	8	25	1	1	0	0	0	1
QQTTLKGVEAVMYMG	CAACAAACTACCTTGAAGGGCGTGGAAGCCGTTATGTATATGGGA	0	QQTTLKGVEAVMYMG	0	1	0	2	2	1	0	1	2	0	0	0	0	1	0	19	16	20	21	12	1	9	21	0	3	2	1	11	9	2	2	0	0	4	1	0
QTTLKGVEAVMYMGT	CAAACTACATTGAAAGGTGTTGAAGCTGTTATGTACATGGGTACA	0	QTTLKGVEAVMYMGT	0	0	0	1	2	8	3	16	30	0	8	39	1	5	39	17	27	25	13	50	68	6	21	0	2	24	89	17	27	38	1	10	106	13	29	38
TTLKGVEAVMYMGTL	ACTACTCTTAAAGGTGTAGAGGCTGTAATGTATATGGGGACATTA	0	TTLKGVEAVMYMGTL	1	0	0	8	28	23	45	39	92	81	82	96	51	73	142	12	8	10	23	83	73	2	7	1	54	62	99	9	25	32	50	59	120	17	54	27
TLKGVEAVMYMGTLS	ACTCTAAAAGGTGTCGAAGCCGTTATGTATATGGGCACCTTGTCC	0	TLKGVEAVMYMGTLS	0	0	0	3	20	14	11	25	51	25	35	36	11	20	65	13	15	13	42	31	70	1	9	0	51	16	92	10	12	32	45	10	100	30	11	47
LKGVEAVMYMGTLSY	TTAAAAGGTGTAGAAGCTGTGATGTATATGGGCACTTTGTCATAC	0	LKGVEAVMYMGTLSY	0	0	0	24	2	5	42	1	10	71	2	3	30	0	1	12	15	11	36	23	30	0	9	1	73	1	14	15	16	46	48	1	7	22	1	27
KGVEAVMYMGTLSYE	AAGGGTGTGGAGGCCGTTATGTACATGGGTACACTATCTTACGAA	0	KGVEAVMYMGTLSYE	0	0	0	9	30	5	10	49	8	24	25	5	11	8	7	20	15	15	22	37	18	1	12	3	49	11	20	8	14	23	24	2	8	31	12	21
GVEAVMYMGTLSYEQ	GGCGTGGAAGCTGTTATGTATATGGGGACACTTAGTTATGAACAA	0	GVEAVMYMGTLSYEQ	0	0	0	14	8	4	36	12	17	43	3	10	30	0	3	5	11	2	20	11	11	1	7	0	38	5	7	4	10	18	26	2	5	13	5	15
VEAVMYMGTLSYEQF	GTCGAGGCGGTTATGTATATGGGCACCCTATCATACGAACAATTC	0	VEAVMYMGTLSYEQF	0	0	0	15	2	9	72	4	50	106	5	29	98	1	28	10	17	17	40	20	43	0	15	0	56	14	61	10	20	48	56	6	30	28	14	63
EAVMYMGTLSYEQFK	GAGGCGGTGATGTACATGGGTACTCTGTCTTATGAACAATTTAAA	0	EAVMYMGTLSYEQFK	0	0	1	42	37	29	102	67	42	185	46	66	122	21	47	22	21	10	42	47	77	1	19	2	66	16	127	11	13	42	81	16	99	29	26	74
AVMYMGTLSYEQFKK	GCAGTGATGTACATGGGCACCTTATCATACGAACAGTTTAAAAAA	0	AVMYMGTLSYEQFKK	0	0	0	1	0	0	0	0	0	0	0	0	0	0	0	13	16	17	0	0	3	8	9	1	1	0	0	0	1	7	0	0	0	1	0	1
VMYMGTLSYEQFKKG	GTCATGTATATGGGAACATTGTCATATGAGCAATTTAAAAAAGGC	0	VMYMGTLSYEQFKKG	0	0	0	0	0	0	0	0	0	0	0	0	0	0	0	8	20	16	1	6	0	5	11	0	0	0	1	1	1	2	0	0	0	0	0	0
MYMGTLSYEQFKKGV	ATGTATATGGGAACTTTATCATACGAGCAATTTAAAAAAGGTGTT	0	MYMGTLSYEQFKKGV	0	0	0	6	0	0	11	0	0	1	0	0	0	0	0	12	14	15	12	1	0	3	17	0	2	0	1	16	1	0	2	0	0	3	0	3
YMGTLSYEQFKKGVQ	TACATGGGCACTTTATCGTATGAACAATTCAAAAAGGGAGTACAA	0	YMGTLSYEQFKKGVQ	0	0	0	20	0	0	25	0	0	43	0	0	7	0	0	9	15	9	23	7	0	0	4	2	29	3	0	6	3	0	16	1	0	19	1	2
MGTLSYEQFKKGVQI	ATGGGTACACTATCTTATGAACAATTTAAAAAGGGTGTGCAAATA	0	MGTLSYEQFKKGVQI	0	0	0	0	0	0	0	0	6	0	0	3	1	0	0	15	14	14	6	7	3	8	12	0	3	1	0	8	7	0	0	0	0	3	3	2
GTLSYEQFKKGVQIP	GGTACCCTAAGTTATGAACAGTTCAAGAAAGGTGTTCAGATCCCA	0	GTLSYEQFKKGVQIP	0	0	0	2	3	0	2	0	0	3	1	0	0	0	0	9	10	17	1	2	18	8	11	0	1	0	2	11	2	32	1	0	0	2	0	1
TLSYEQFKKGVQIPC	ACTTTAAGTTACGAACAGTTCAAGAAGGGCGTACAAATTCCATGT	0	TLSYEQFKKGVQIPC	0	1	0	2	6	2	2	6	2	1	0	0	1	0	0	9	24	13	15	8	4	6	13	0	4	3	2	20	8	1	1	0	2	13	1	2
LSYEQFKKGVQIPCT	CTATCCTATGAGCAATTTAAGAAGGGGGTTCAAATCCCATGCACG	0	LSYEQFKKGVQIPCT	0	0	0	1	0	7	5	0	13	3	0	2	3	0	1	12	16	18	15	19	13	3	17	0	14	10	4	9	23	12	0	3	2	9	9	3
SYEQFKKGVQIPCTC	TCATACGAACAATTCAAGAAAGGCGTGCAAATTCCTTGCACGTGT	0	SYEQFKKGVQIPCTC	0	0	0	12	1	3	4	0	12	0	0	5	0	0	7	16	23	36	14	5	0	18	25	2	4	0	0	3	3	0	0	0	0	4	0	0
YEQFKKGVQIPCTCG	TATGAACAGTTTAAGAAGGGTGTACAAATTCCGTGTACATGCGGT	0	YEQFKKGVQIPCTCG	0	0	0	8	0	9	9	2	11	3	0	0	3	0	0	25	19	26	14	11	20	11	18	3	5	4	6	18	6	39	1	1	1	10	2	9
EQFKKGVQIPCTCGK	GAACAATTCAAGAAAGGAGTACAAATTCCATGCACATGCGGCAAA	0	EQFKKGVQIPCTCGK	0	0	2	1	0	0	10	0	0	2	0	0	0	0	0	18	16	25	9	7	24	11	21	1	4	1	5	12	17	46	1	1	0	0	2	15
QFKKGVQIPCTCGKQ	CAGTTTAAAAAAGGTGTCCAGATCCCATGTACTTGTGGTAAGCAA	0	QFKKGVQIPCTCGKQ	0	0	0	9	0	6	13	0	11	4	0	7	4	0	1	4	10	6	7	3	6	5	8	0	0	0	0	3	4	8	0	0	0	1	0	1
FKKGVQIPCTCGKQA	TTCAAGAAGGGAGTTCAAATACCGTGTACCTGCGGCAAACAAGCC	0	FKKGVQIPCTCGKQA	0	0	0	2	3	14	3	0	28	1	0	13	1	0	1	4	6	1	1	4	7	4	4	1	0	0	2	1	1	8	0	0	0	0	2	4
KKGVQIPCTCGKQAT	AAAAAGGGTGTTCAAATTCCTTGTACTTGTGGAAAACAGGCCACG	0	KKGVQIPCTCGKQAT	0	0	0	3	0	0	1	0	0	1	0	1	0	0	0	2	5	4	1	0	4	1	4	0	1	0	5	4	0	7	0	0	0	2	0	10
KGVQIPCTCGKQATK	AAAGGTGTACAAATTCCTTGTACATGTGGCAAGCAAGCTACCAAG	0	KGVQIPCTCGKQATK	0	0	0	0	0	3	0	0	6	0	0	0	0	0	0	18	16	20	4	8	17	11	12	3	1	1	4	2	5	20	1	0	0	0	4	1
GVQIPCTCGKQATKY	GGTGTCCAAATTCCATGCACTTGCGGGAAGCAAGCGACCAAATAT	0	GVQIPCTCGKQATKY	0	0	0	2	1	0	3	2	0	3	2	1	0	0	0	23	38	24	10	13	6	10	29	4	15	2	0	14	14	16	3	1	0	6	6	3
VQIPCTCGKQATKYL	GTGCAAATCCCATGCACGTGCGGTAAACAAGCTACGAAGTATCTG	0	VQIPCTCGKQATKYL	0	0	0	4	1	1	3	0	1	1	0	1	1	0	0	23	29	28	26	10	0	10	27	0	4	0	0	17	9	0	1	0	0	6	0	0
QIPCTCGKQATKYLV	CAAATCCCATGCACCTGTGGTAAACAAGCTACGAAATACTTGGTC	0	QIPCTCGKQATKYLV	0	0	0	2	0	4	0	0	3	0	0	1	0	1	1	22	22	21	16	8	6	5	19	2	5	0	2	10	8	5	2	0	2	8	0	10
IPCTCGKQATKYLVQ	ATACCATGTACGTGCGGCAAACAGGCGACTAAATATCTCGTCCAG	0	IPCTCGKQATKYLVQ	0	1	1	4	5	1	5	8	0	0	2	1	1	0	0	34	28	32	13	13	13	17	38	3	7	1	6	13	12	30	3	0	4	2	0	4
PCTCGKQATKYLVQQ	CCATGCACATGTGGCAAGCAAGCAACTAAATACTTGGTGCAACAA	0	PCTCGKQATKYLVQQ	0	0	0	0	0	3	0	0	1	0	0	2	1	0	1	24	19	30	16	1	5	5	25	0	3	0	0	16	2	10	1	0	0	4	0	0
CTCGKQATKYLVQQE	TGTACCTGTGGTAAACAGGCAACAAAGTATCTGGTGCAACAGGAA	0	CTCGKQATKYLVQQE	0	0	0	7	0	11	6	0	6	2	0	1	0	0	0	9	21	16	12	3	8	11	17	1	5	1	0	13	5	13	0	0	0	7	1	4
TCGKQATKYLVQQES	ACTTGTGGCAAGCAAGCAACCAAATATCTAGTTCAGCAAGAATCA	0	TCGKQATKYLVQQES	0	0	1	4	25	30	32	30	64	28	22	69	14	16	103	26	29	26	60	33	61	5	19	0	50	25	77	29	29	71	41	19	75	42	10	53
CGKQATKYLVQQESP	TGCGGCAAACAAGCTACTAAATATTTAGTTCAACAAGAATCTCCT	0	CGKQATKYLVQQESP	0	0	0	24	0	10	67	2	24	62	0	22	27	1	9	25	29	15	33	20	18	6	26	0	47	5	14	25	14	31	25	5	19	35	6	17
GKQATKYLVQQESPF	GGTAAGCAAGCCACGAAGTACCTTGTCCAGCAGGAAAGCCCATTT	0	GKQATKYLVQQESPF	0	0	0	9	3	16	26	4	31	62	1	31	44	0	63	13	23	13	54	47	56	0	8	0	71	20	80	15	30	60	74	7	82	47	11	40
KQATKYLVQQESPFV	AAGCAAGCTACTAAGTATTTGGTGCAACAAGAATCACCATTCGTT	0	KQATKYLVQQESPFV	0	0	0	3	0	5	4	0	10	3	0	9	4	0	7	13	21	21	40	45	38	1	11	2	27	5	28	23	18	38	6	2	20	32	8	30
QATKYLVQQESPFVM	CAAGCCACTAAATATTTAGTCCAACAAGAGTCTCCATTTGTCATG	0	QATKYLVQQESPFVM	0	0	1	11	5	36	39	7	79	68	3	95	36	1	90	16	23	17	48	20	60	1	12	0	79	6	88	21	7	42	57	4	70	49	9	74
ATKYLVQQESPFVMM	GCTACAAAGTATTTGGTACAGCAGGAAAGTCCATTCGTTATGATG	0	ATKYLVQQESPFVMM	0	0	0	7	1	38	12	0	142	28	1	154	22	3	162	17	22	16	38	47	71	2	13	0	62	25	98	18	32	55	47	22	123	40	21	49
TKYLVQQESPFVMMS	ACCAAATATTTAGTCCAACAGGAAAGTCCATTTGTTATGATGTCT	0	TKYLVQQESPFVMMS	0	0	0	17	3	26	23	2	50	31	0	38	8	1	41	14	19	25	27	18	15	2	18	1	45	2	20	11	10	14	26	0	20	23	4	8
KYLVQQESPFVMMSA	AAATATCTGGTACAACAAGAGAGCCCATTTGTCATGATGTCCGCT	0	KYLVQQESPFVMMSA	0	0	1	14	4	31	26	6	103	36	3	145	19	4	90	16	17	13	37	32	62	3	16	0	73	9	105	18	36	32	42	4	76	38	13	63
YLVQQESPFVMMSAP	TACTTAGTTCAGCAAGAATCTCCTTTTGTTATGATGAGCGCTCCA	0	YLVQQESPFVMMSAP	0	0	1	17	8	27	81	20	73	135	4	78	88	7	92	12	14	14	37	32	70	1	15	0	57	21	75	8	20	37	67	14	121	34	18	54
LVQQESPFVMMSAPP	TTGGTTCAGCAAGAATCACCGTTTGTGATGATGTCTGCCCCACCA	0	LVQQESPFVMMSAPP	0	0	0	8	6	16	29	5	54	69	1	41	49	0	25	10	7	13	40	27	38	6	15	0	49	9	27	13	16	35	53	3	32	47	5	35
VQQESPFVMMSAPPA	GTACAACAGGAAAGCCCCTTCGTCATGATGTCTGCACCGCCCGCT	0	VQQESPFVMMSAPPA	0	0	0	22	4	21	40	7	54	88	8	44	87	4	78	6	8	7	34	53	56	1	7	0	52	14	125	2	20	25	89	30	145	20	18	35
QQESPFVMMSAPPAQ	CAGCAGGAAAGCCCTTTCGTAATGATGTCAGCTCCGCCTGCACAA	0	QQESPFVMMSAPPAQ	0	0	0	13	18	24	43	54	71	79	88	96	96	124	209	14	13	19	57	146	103	4	14	1	99	123	226	7	38	18	127	184	326	22	70	29
QESPFVMMSAPPAQY	CAAGAATCACCATTTGTAATGATGAGTGCACCACCGGCTCAGTAT	0	QESPFVMMSAPPAQY	0	0	0	11	0	5	12	0	29	20	0	39	31	0	65	3	6	3	10	42	35	0	5	0	18	33	78	0	8	14	19	51	94	6	18	12
ESPFVMMSAPPAQYE	GAATCACCTTTTGTGATGATGAGCGCGCCTCCGGCCCAATATGAG	0	ESPFVMMSAPPAQYE	0	0	0	0	15	0	3	23	0	7	40	3	7	51	1	6	8	8	8	36	51	1	4	0	21	43	98	1	5	6	39	37	124	7	26	12
SPFVMMSAPPAQYEL	TCACCGTTCGTTATGATGAGTGCTCCACCGGCTCAGTATGAGTTA	0	SPFVMMSAPPAQYEL	1	0	0	13	1	7	25	2	6	42	4	5	46	17	11	3	7	2	13	52	41	0	2	0	20	45	75	1	8	5	30	77	113	6	20	7
PFVMMSAPPAQYELK	CCTTTCGTTATGATGTCAGCCCCACCAGCTCAATATGAACTGAAG	0	PFVMMSAPPAQYELK	0	0	0	8	1	2	14	1	18	19	1	13	6	2	29	8	16	15	22	17	24	2	11	0	37	7	49	9	8	22	29	2	51	14	3	11
FVMMSAPPAQYELKH	TTTGTGATGATGTCCGCGCCACCAGCGCAATATGAATTAAAACAT	0	FVMMSAPPAQYELKH	0	0	0	4	0	2	5	0	2	2	0	1	0	0	0	9	4	5	8	10	11	6	3	0	8	0	4	2	5	7	1	0	1	1	1	0
VMMSAPPAQYELKHG	GTAATGATGTCAGCACCTCCTGCTCAATATGAACTCAAACATGGT	0	VMMSAPPAQYELKHG	0	0	0	0	1	0	0	1	0	0	2	0	1	0	0	35	35	31	25	21	33	19	23	1	4	0	11	15	12	70	4	0	1	7	1	17
MMSAPPAQYELKHGT	ATGATGTCCGCACCCCCTGCCCAATATGAATTGAAGCATGGTACA	0	MMSAPPAQYELKHGT	0	0	0	1	0	0	0	0	2	0	1	3	0	0	1	13	37	23	6	8	9	10	14	0	0	0	5	14	5	19	2	0	2	3	1	9
MSAPPAQYELKHGTF	ATGTCGGCTCCTCCCGCGCAATACGAATTAAAACACGGTACCTTT	0	MSAPPAQYELKHGTF	0	0	0	3	3	3	4	1	1	0	0	0	0	0	0	13	22	16	13	10	4	7	13	0	2	2	0	11	9	8	3	0	0	3	3	0
SAPPAQYELKHGTFT	TCTGCACCACCTGCTCAATATGAACTAAAACATGGCACCTTTACT	0	SAPPAQYELKHGTFT	0	0	0	0	0	0	0	0	0	0	0	0	0	0	0	15	15	11	11	5	5	5	10	0	3	0	0	10	1	12	0	0	0	1	0	0
APPAQYELKHGTFTC	GCACCCCCTGCCCAGTATGAATTGAAACATGGTACATTTACGTGT	0	APPAQYELKHGTFTC	0	0	1	4	5	13	17	3	10	9	0	4	2	0	0	20	26	31	24	22	2	11	17	0	14	4	1	20	16	4	4	1	0	17	6	0
PPAQYELKHGTFTCA	CCTCCAGCTCAATACGAACTAAAGCATGGTACCTTTACTTGTGCG	0	PPAQYELKHGTFTCA	0	0	0	2	19	14	4	14	11	4	6	3	0	1	0	15	31	21	30	24	27	8	28	1	16	1	7	21	14	30	8	3	0	25	4	10
PAQYELKHGTFTCAS	CCCGCCCAATATGAACTGAAGCACGGAACATTTACATGTGCTAGC	0	PAQYELKHGTFTCAS	1	0	0	2	2	5	0	2	4	1	0	1	0	0	0	3	11	7	15	7	2	3	9	0	13	0	0	20	4	2	2	0	0	12	0	0
AQYELKHGTFTCASE	GCTCAGTACGAATTAAAACATGGTACTTTCACGTGCGCTAGCGAA	0	AQYELKHGTFTCASE	0	0	0	23	6	4	64	12	6	49	2	2	16	4	0	18	28	23	54	32	21	2	19	0	59	3	11	31	17	33	48	1	3	50	12	14
QYELKHGTFTCASEY	CAGTATGAATTGAAACACGGAACATTCACGTGCGCGTCTGAATAT	0	QYELKHGTFTCASEY	0	0	0	9	5	6	47	2	3	62	0	3	36	0	0	21	20	19	59	34	37	4	17	0	94	12	12	14	26	75	73	10	10	59	15	27
YELKHGTFTCASEYT	TATGAGTTGAAGCATGGTACGTTTACCTGTGCCTCTGAATATACG	0	YELKHGTFTCASEYT	0	0	0	17	17	10	60	20	23	90	9	3	64	2	0	24	20	24	54	39	23	2	19	1	80	17	7	24	18	60	70	5	2	44	14	23
ELKHGTFTCASEYTG	GAACTAAAACACGGCACATTCACATGCGCCTCTGAATATACTGGT	0	ELKHGTFTCASEYTG	1	0	0	26	9	11	98	7	33	164	1	21	123	0	2	21	33	19	45	48	25	3	24	0	90	13	4	29	26	44	82	4	4	52	19	14
LKHGTFTCASEYTGN	CTGAAACACGGTACATTCACCTGTGCGTCAGAATATACTGGTAAC	0	LKHGTFTCASEYTGN	0	0	0	5	2	15	19	4	24	14	4	9	3	2	5	7	16	13	23	10	12	3	10	0	18	4	0	9	6	16	13	0	0	13	5	5
KHGTFTCASEYTGNY	AAACATGGTACTTTCACCTGCGCATCAGAGTATACGGGTAATTAT	0	KHGTFTCASEYTGNY	0	0	1	27	11	17	77	22	30	138	16	22	135	5	4	14	28	24	88	52	8	6	22	1	116	34	9	19	25	23	147	23	4	68	36	18
HGTFTCASEYTGNYQ	CATGGAACTTTTACTTGCGCATCCGAATACACCGGTAATTACCAA	0	HGTFTCASEYTGNYQ	0	0	0	0	0	0	0	0	3	0	0	5	0	0	0	0	1	0	0	0	5	1	0	0	1	1	5	0	1	14	4	0	1	2	0	3
GTFTCASEYTGNYQC	GGGACCTTTACCTGTGCATCTGAATACACAGGAAACTATCAGTGC	0	GTFTCASEYTGNYQC	1	0	0	11	2	3	40	5	7	47	2	0	36	1	1	14	17	14	42	38	11	3	13	0	66	7	3	23	17	17	39	4	0	34	12	4
TFTCASEYTGNYQCG	ACTTTTACTTGTGCCTCCGAATATACTGGCAACTATCAGTGCGGT	0	TFTCASEYTGNYQCG	0	0	0	9	0	1	46	0	1	48	0	0	16	0	0	11	13	10	24	24	12	3	5	0	26	5	8	28	12	26	8	2	2	29	6	10
FTCASEYTGNYQCGH	TTTACTTGCGCATCCGAGTATACGGGAAATTATCAGTGCGGCCAT	0	FTCASEYTGNYQCGH	0	0	1	27	12	5	32	10	0	19	4	0	1	0	0	9	15	16	22	15	15	7	9	0	16	4	6	19	15	26	8	3	0	14	6	1
TCASEYTGNYQCGHY	ACCTGCGCTAGCGAATATACAGGTAACTACCAGTGCGGACATTAT	0	TCASEYTGNYQCGHY	0	0	0	9	7	3	13	4	9	9	5	1	3	0	0	15	12	21	17	11	4	6	19	2	7	7	2	20	17	2	4	0	1	8	1	3
CASEYTGNYQCGHYK	TGTGCCTCTGAATATACAGGTAATTATCAGTGTGGGCATTATAAG	0	CASEYTGNYQCGHYK	0	0	0	3	16	0	9	17	3	4	10	0	0	0	0	8	18	12	15	9	0	8	10	1	5	2	1	15	11	6	3	1	0	9	3	1
ASEYTGNYQCGHYKH	GCTTCCGAATACACGGGCAATTACCAATGTGGACATTATAAACAC	0	ASEYTGNYQCGHYKH	0	0	0	9	8	10	10	11	4	5	6	6	0	1	1	16	12	7	18	22	15	5	15	2	6	5	3	18	13	24	1	4	0	15	9	5
SEYTGNYQCGHYKHI	TCCGAATATACCGGTAATTACCAATGTGGGCACTATAAACATATT	0	SEYTGNYQCGHYKHI	0	0	0	1	0	4	6	0	6	3	0	4	1	0	0	7	1	3	5	6	1	5	13	0	5	0	0	6	1	3	1	0	0	2	0	0
EYTGNYQCGHYKHIT	GAGTATACTGGCAATTATCAATGCGGCCATTATAAGCATATTACC	0	EYTGNYQCGHYKHIT	0	0	0	3	0	0	5	1	0	9	0	0	1	0	0	6	5	2	4	3	3	2	4	0	5	0	2	6	2	9	1	0	2	4	1	9
YTGNYQCGHYKHITS	TATACCGGGAATTACCAATGTGGCCATTATAAACATATTACCTCT	0	YTGNYQCGHYKHITS	0	0	0	29	2	1	72	1	4	82	0	1	32	1	2	15	23	22	38	16	10	1	13	0	43	3	2	20	9	9	34	0	1	35	3	8
TGNYQCGHYKHITSK	ACAGGTAATTACCAGTGTGGCCATTACAAACATATTACTTCCAAA	0	TGNYQCGHYKHITSK	0	0	0	5	5	5	18	1	12	36	0	6	7	0	4	11	16	19	34	22	10	3	12	0	42	9	7	11	18	14	20	3	4	36	10	7
GNYQCGHYKHITSKE	GGAAATTACCAATGTGGACATTACAAACACATAACTAGTAAGGAG	0	GNYQCGHYKHITSKE	0	0	0	19	12	8	61	25	5	71	6	1	9	1	1	22	32	21	48	38	26	13	17	2	35	11	16	47	28	49	20	6	8	49	14	13
NYQCGHYKHITSKET	AACTACCAGTGCGGTCATTATAAGCATATTACTTCAAAGGAAACA	0	NYQCGHYKHITSKET	0	0	0	6	23	8	9	13	21	4	13	12	1	2	6	20	21	16	21	22	3	6	17	0	9	7	0	22	19	1	3	6	0	25	11	1
YQCGHYKHITSKETL	TATCAGTGTGGACATTATAAACATATTACCTCAAAGGAAACTTTG	0	YQCGHYKHITSKETL	0	0	0	16	15	13	35	26	18	29	21	13	16	5	2	16	18	13	29	42	22	0	18	1	25	41	28	23	27	55	13	51	11	23	34	44
QCGHYKHITSKETLY	CAATGTGGTCACTATAAACACATTACGTCTAAGGAAACCTTATAC	0	QCGHYKHITSKETLY	0	0	0	19	33	16	56	98	25	52	157	14	9	142	8	13	20	7	25	65	15	6	8	1	27	54	14	24	13	24	27	39	8	43	40	22
CGHYKHITSKETLYC	TGCGGCCATTACAAGCACATTACTAGCAAAGAGACCTTATACTGT	0	CGHYKHITSKETLYC	0	0	0	5	27	21	32	87	55	31	82	40	9	58	26	26	19	19	36	72	41	4	17	1	36	49	23	34	18	77	15	39	9	57	39	31
GHYKHITSKETLYCI	GGGCACTATAAGCATATCACAAGTAAGGAAACTTTATATTGTATT	0	GHYKHITSKETLYCI	0	0	0	9	54	6	20	96	20	25	132	14	4	140	15	16	18	13	47	71	67	3	17	1	30	62	37	30	25	70	17	87	29	48	39	51
HYKHITSKETLYCID	CATTATAAACACATTACCTCAAAAGAAACACTATACTGTATAGAC	0	HYKHITSKETLYCID	0	1	1	12	36	9	8	130	27	6	242	18	2	317	24	4	11	12	20	82	8	5	10	0	12	88	12	16	17	22	4	219	9	8	46	19
YKHITSKETLYCIDG	TACAAACATATCACATCGAAAGAAACTTTATATTGTATTGACGGT	0	YKHITSKETLYCIDG	1	1	0	11	43	24	34	98	76	28	182	60	14	184	67	14	12	16	29	135	69	1	15	1	35	140	61	17	14	39	28	209	59	40	30	29
KHITSKETLYCIDGA	AAACACATCACCAGTAAGGAAACTTTATATTGTATAGATGGTGCT	0	KHITSKETLYCIDGA	0	1	1	38	60	27	97	160	82	161	347	94	126	514	102	17	22	16	35	191	56	4	17	0	87	260	72	19	21	50	77	477	88	19	62	64
HITSKETLYCIDGAL	CATATAACCTCAAAGGAAACCTTGTATTGTATTGATGGGGCACTC	0	HITSKETLYCIDGAL	0	0	1	5	43	7	9	94	31	10	124	23	11	195	25	7	12	4	29	91	18	0	2	1	52	83	32	8	18	21	44	173	32	17	23	17
ITSKETLYCIDGALL	ATCACCTCCAAGGAAACTCTTTACTGTATCGATGGGGCTCTGTTA	0	ITSKETLYCIDGALL	0	0	1	23	17	26	48	31	51	131	59	57	99	107	46	25	32	22	57	154	72	2	20	0	119	191	48	12	23	80	142	269	26	41	74	72
TSKETLYCIDGALLT	ACCAGCAAAGAAACCTTATATTGCATAGATGGTGCACTTCTAACG	0	TSKETLYCIDGALLT	0	0	0	10	14	5	34	16	4	63	17	4	63	8	4	10	11	13	44	18	31	2	14	0	83	4	25	15	9	55	109	10	24	35	13	40
SKETLYCIDGALLTK	AGTAAAGAAACTCTATATTGTATTGATGGTGCCCTACTTACAAAA	0	SKETLYCIDGALLTK	0	0	0	30	0	22	98	1	40	166	3	33	167	0	13	18	18	17	54	39	42	2	17	0	105	12	36	9	23	70	97	9	27	25	21	39
KETLYCIDGALLTKS	AAGGAAACACTTTACTGCATCGATGGCGCCTTATTGACTAAGTCT	0	KETLYCIDGALLTKS	0	0	1	27	21	7	80	24	28	161	15	26	168	8	13	19	30	18	65	18	37	0	15	0	116	13	23	14	9	39	139	9	9	37	12	28
ETLYCIDGALLTKSS	GAGACCTTATACTGCATTGATGGCGCTCTTTTGACGAAATCTTCC	0	ETLYCIDGALLTKSS	0	0	0	20	15	19	54	19	50	107	19	37	84	14	16	12	12	14	47	31	22	1	9	1	66	20	11	8	24	27	73	19	4	22	20	23
TLYCIDGALLTKSSE	ACTTTGTATTGCATTGACGGTGCCCTGCTTACCAAAAGCTCTGAA	0	TLYCIDGALLTKSSE	0	0	0	9	4	3	25	16	2	37	0	4	9	1	1	22	30	23	69	35	5	1	21	0	59	11	2	21	11	11	49	6	0	42	13	1
LYCIDGALLTKSSEY	TTGTACTGTATCGATGGAGCTCTACTTACGAAGTCTAGCGAGTAC	0	LYCIDGALLTKSSEY	0	0	0	10	10	1	23	5	2	16	2	0	9	1	0	13	20	23	29	36	6	2	20	0	32	8	1	15	6	18	13	2	1	26	3	1
YCIDGALLTKSSEYK	TACTGTATTGATGGTGCTTTATTAACTAAATCGTCCGAGTATAAA	0	YCIDGALLTKSSEYK	0	0	0	16	14	6	51	26	9	80	17	4	54	3	0	18	22	13	40	12	13	4	20	1	62	3	2	21	6	20	55	0	0	38	11	4
CIDGALLTKSSEYKG	TGCATCGACGGTGCTCTACTGACCAAAAGCTCGGAATACAAGGGT	0	CIDGALLTKSSEYKG	0	0	0	3	7	1	6	3	1	3	3	0	1	1	0	32	35	44	22	32	11	17	17	2	11	5	3	34	19	28	3	6	1	7	5	6
IDGALLTKSSEYKGP	ATTGATGGTGCTCTATTAACAAAATCTTCTGAGTATAAGGGTCCA	0	IDGALLTKSSEYKGP	0	0	0	0	9	0	0	7	0	0	5	0	0	0	0	10	13	15	5	10	4	3	7	0	0	5	1	5	3	11	0	0	0	1	6	4
DGALLTKSSEYKGPI	GATGGCGCTTTGCTAACCAAAAGCTCTGAATATAAAGGACCTATC	0	DGALLTKSSEYKGPI	0	0	0	0	7	0	0	6	0	0	1	0	0	0	0	12	15	9	9	28	2	5	16	0	2	13	1	9	22	5	0	4	0	3	9	3
GALLTKSSEYKGPIT	GGTGCGCTGTTAACGAAATCTTCAGAGTATAAGGGGCCCATTACG	0	GALLTKSSEYKGPIT	0	0	0	0	9	3	2	13	2	0	5	1	1	1	0	23	18	14	6	18	11	10	8	0	4	3	4	10	5	12	0	2	1	7	4	5
ALLTKSSEYKGPITD	GCTTTATTGACAAAATCTTCCGAATACAAAGGTCCTATTACGGAT	0	ALLTKSSEYKGPITD	0	0	0	0	0	0	0	1	0	0	1	0	2	0	0	11	7	10	8	13	4	10	15	0	0	3	0	7	16	6	1	0	0	4	4	0
LLTKSSEYKGPITDV	TTATTGACCAAAAGTAGCGAGTACAAGGGACCCATTACCGATGTC	0	LLTKSSEYKGPITDV	0	0	0	0	3	3	0	4	1	0	1	4	0	0	1	22	30	17	11	31	1	10	21	0	2	2	0	9	22	4	0	0	0	0	3	1
LTKSSEYKGPITDVF	CTGACTAAGTCTTCTGAGTATAAAGGCCCCATTACTGATGTTTTT	0	LTKSSEYKGPITDVF	0	1	0	3	10	2	1	11	1	0	9	1	0	3	0	22	27	21	22	13	4	13	19	2	2	0	0	14	11	12	2	1	1	11	0	3
TKSSEYKGPITDVFY	ACAAAATCATCTGAGTACAAGGGACCAATTACTGATGTCTTCTAT	0	TKSSEYKGPITDVFY	0	0	0	0	2	0	4	1	0	4	0	0	2	0	1	19	26	19	16	22	5	19	21	0	6	2	1	17	5	12	1	0	1	4	1	1
KSSEYKGPITDVFYK	AAATCTAGTGAATATAAAGGTCCGATCACAGATGTCTTTTATAAG	0	KSSEYKGPITDVFYK	0	0	0	0	0	0	0	0	0	0	0	0	0	0	0	18	17	14	11	3	2	5	15	0	2	3	3	5	10	7	0	0	0	4	0	0
SSEYKGPITDVFYKE	TCGAGTGAATACAAGGGGCCTATCACAGACGTTTTCTACAAGGAA	0	SSEYKGPITDVFYKE	0	0	0	6	0	7	2	0	1	1	0	0	2	0	0	15	15	16	20	4	7	5	22	0	5	1	1	24	3	13	1	0	0	3	4	3
SEYKGPITDVFYKEN	TCCGAATATAAAGGTCCAATTACTGATGTTTTCTATAAGGAAAAT	0	SEYKGPITDVFYKEN	0	1	0	8	29	3	8	55	0	9	28	0	3	6	0	15	22	12	21	27	6	11	8	1	6	16	3	14	16	21	0	7	0	4	16	5
EYKGPITDVFYKENS	GAATATAAGGGACCGATAACTGATGTCTTTTACAAAGAGAATTCC	0	EYKGPITDVFYKENS	0	0	0	10	27	4	24	89	4	40	76	1	15	22	0	10	11	3	27	27	24	1	7	0	38	7	10	5	14	27	24	10	1	30	24	4
YKGPITDVFYKENSY	TATAAGGGACCAATAACTGATGTGTTCTACAAGGAAAACTCTTAC	0	YKGPITDVFYKENSY	1	1	0	21	35	3	72	105	5	125	87	2	75	78	1	19	24	14	62	75	33	3	18	0	90	69	18	8	26	67	78	73	9	44	72	31
KGPITDVFYKENSYT	AAAGGTCCCATTACCGACGTCTTCTATAAAGAGAACTCCTACACT	0	KGPITDVFYKENSYT	0	0	0	10	5	0	18	20	1	46	28	1	25	8	0	6	14	8	22	26	29	1	11	1	39	16	15	13	14	34	29	9	2	13	22	15
GPITDVFYKENSYTT	GGCCCAATTACCGATGTATTTTATAAAGAAAATAGTTACACCACA	0	GPITDVFYKENSYTT	0	0	0	4	5	1	2	9	0	6	7	0	3	0	0	7	8	6	17	12	22	0	6	0	18	8	12	3	8	39	16	4	1	14	6	9
PITDVFYKENSYTTT	CCAATTACGGATGTCTTTTATAAAGAAAACTCTTACACAACTACT	0	PITDVFYKENSYTTT	0	0	0	16	3	0	23	1	2	25	1	0	3	0	0	12	17	14	16	8	4	5	9	0	11	2	0	6	1	4	4	1	0	5	6	0
ITDVFYKENSYTTTI	ATTACTGATGTGTTTTACAAAGAGAACTCATATACCACGACCATA	0	ITDVFYKENSYTTTI	0	0	0	13	4	1	21	12	5	31	3	3	12	0	1	14	13	12	31	14	6	5	11	0	47	7	0	21	10	4	27	4	0	39	9	3
TDVFYKENSYTTTIK	ACAGATGTATTTTACAAAGAAAATTCGTATACAACAACAATTAAG	0	TDVFYKENSYTTTIK	0	0	0	8	16	4	21	38	14	28	18	4	3	4	1	8	10	6	29	19	9	3	14	1	33	10	2	17	13	29	18	1	1	26	13	8
DVFYKENSYTTTIKP	GACGTGTTTTATAAAGAGAATTCCTACACAACAACTATAAAACCT	0	DVFYKENSYTTTIKP	0	0	0	4	2	0	4	13	0	8	4	0	1	2	1	13	12	11	32	17	2	2	10	0	11	9	0	14	7	11	5	2	0	20	6	2
VFYKENSYTTTIKPV	GTCTTCTATAAAGAAAATTCTTACACTACTACTATCAAGCCAGTT	0	VFYKENSYTTTIKPV	0	0	0	12	0	5	29	0	6	52	1	2	23	0	0	8	11	5	28	9	1	2	8	0	29	0	0	12	12	3	36	0	0	33	2	7
FYKENSYTTTIKPVT	TTCTATAAGGAAAATTCATATACTACGACCATTAAGCCTGTAACA	0	FYKENSYTTTIKPVT	0	0	0	0	0	0	0	0	0	0	0	0	0	0	0	6	8	8	11	9	0	3	12	0	5	0	0	14	7	0	2	0	0	6	3	0
YKENSYTTTIKPVTY	TATAAGGAGAACTCTTATACTACCACTATTAAACCCGTGACTTAC	0	YKENSYTTTIKPVTY	0	0	0	1	0	7	0	0	12	0	0	10	0	0	1	22	15	12	9	2	17	5	11	2	4	0	11	12	2	20	2	0	0	4	1	22
KENSYTTTIKPVTYK	AAAGAAAACTCCTATACCACTACTATCAAACCCGTTACATATAAG	0	KENSYTTTIKPVTYK	0	0	0	2	0	7	2	0	18	0	0	11	0	0	3	7	12	14	11	12	14	5	12	2	1	1	13	14	9	29	1	1	3	1	6	16
ENSYTTTIKPVTYKL	GAAAACAGCTACACCACTACAATTAAACCAGTTACGTATAAACTG	0	ENSYTTTIKPVTYKL	0	0	0	2	0	11	4	2	22	3	1	18	0	0	13	12	15	8	9	17	8	7	10	0	2	4	6	5	8	14	1	2	4	1	4	10
NSYTTTIKPVTYKLD	AATAGCTATACAACAACGATCAAACCAGTCACCTATAAACTTGAT	0	NSYTTTIKPVTYKLD	1	0	0	9	1	18	6	0	43	4	0	26	0	0	0	23	20	14	24	17	7	7	16	2	11	4	5	19	11	6	3	0	2	15	2	5
SYTTTIKPVTYKLDG	TCCTACACTACTACTATCAAACCGGTTACATATAAACTAGACGGT	0	SYTTTIKPVTYKLDG	0	0	0	2	4	4	15	3	3	5	0	3	2	0	0	8	7	10	18	13	12	4	12	0	15	0	18	22	9	39	10	0	3	17	0	12
YTTTIKPVTYKLDGV	TATACCACTACCATCAAACCGGTAACGTACAAGCTGGATGGCGTT	0	YTTTIKPVTYKLDGV	0	0	0	12	1	0	15	0	1	45	0	0	35	0	0	9	24	7	30	10	11	2	14	0	74	5	1	7	10	24	64	1	0	30	3	10
TTTIKPVTYKLDGVV	ACTACCACAATTAAACCAGTCACTTACAAGCTCGACGGGGTCGTT	0	TTTIKPVTYKLDGVV	0	0	0	9	12	3	37	10	11	85	5	7	88	3	2	8	23	17	60	20	30	2	10	2	114	1	30	21	20	84	129	1	7	31	3	42
TTIKPVTYKLDGVVC	ACTACGATTAAACCTGTTACCTATAAATTAGATGGTGTTGTTTGT	0	TTIKPVTYKLDGVVC	0	0	0	15	6	25	73	9	59	172	6	33	128	0	14	13	14	17	42	24	15	0	11	0	69	10	9	9	15	20	93	3	6	20	12	15
TIKPVTYKLDGVVCT	ACGATAAAACCTGTGACCTATAAGCTAGACGGGGTTGTTTGCACA	0	TIKPVTYKLDGVVCT	0	0	0	12	7	12	45	10	50	85	10	27	49	6	20	6	20	14	36	21	23	3	17	1	85	8	16	12	11	22	80	13	11	45	11	24
IKPVTYKLDGVVCTE	ATAAAACCTGTCACATACAAATTAGACGGTGTCGTCTGTACTGAA	0	IKPVTYKLDGVVCTE	0	0	0	27	13	6	97	24	5	156	18	3	103	5	3	31	45	23	85	38	26	3	31	1	128	23	8	25	16	66	110	9	4	58	16	16
KPVTYKLDGVVCTEI	AAACCTGTTACCTATAAATTGGATGGTGTCGTCTGTACAGAGATT	0	KPVTYKLDGVVCTEI	0	0	0	24	6	20	69	22	22	105	11	13	89	4	2	21	32	14	63	25	12	2	25	0	83	9	3	18	15	25	100	10	2	52	8	9
PVTYKLDGVVCTEID	CCCGTCACTTACAAATTGGATGGAGTTGTTTGTACTGAAATTGAT	0	PVTYKLDGVVCTEID	0	0	0	9	4	0	23	0	7	17	0	2	7	0	0	28	27	29	35	10	9	5	16	0	21	0	8	27	9	32	13	1	0	20	1	7
VTYKLDGVVCTEIDP	GTAACTTATAAATTAGACGGCGTTGTGTGCACTGAGATTGATCCA	0	VTYKLDGVVCTEIDP	0	0	0	4	0	5	11	0	0	9	0	1	3	0	0	6	19	11	14	8	0	4	22	0	9	1	0	8	0	0	8	0	0	9	0	0
TYKLDGVVCTEIDPK	ACGTACAAATTAGATGGGGTGGTCTGTACTGAAATTGATCCCAAG	0	TYKLDGVVCTEIDPK	0	0	2	36	21	9	78	28	31	133	9	16	99	6	8	22	20	26	79	27	11	2	20	0	97	11	8	21	24	8	104	15	6	37	11	7
YKLDGVVCTEIDPKL	TATAAACTAGACGGAGTGGTCTGCACCGAGATCGATCCTAAATTA	0	YKLDGVVCTEIDPKL	0	0	0	4	0	1	13	0	2	9	0	0	3	0	0	3	0	2	4	0	3	1	2	0	7	0	0	5	0	1	2	0	0	7	0	0
KLDGVVCTEIDPKLD	AAATTAGACGGCGTAGTCTGTACGGAAATAGACCCAAAATTAGAT	0	KLDGVVCTEIDPKLD	0	0	0	11	16	3	12	4	4	13	1	0	2	2	1	19	29	19	35	34	6	7	26	4	13	6	0	30	20	16	6	3	0	12	20	9
LDGVVCTEIDPKLDN	TTAGATGGAGTTGTTTGTACCGAAATTGATCCTAAGTTGGATAAT	0	LDGVVCTEIDPKLDN	0	0	0	11	17	1	23	34	0	8	20	1	1	11	0	15	20	17	17	20	2	5	10	1	4	5	0	11	10	4	2	5	0	11	9	0
DGVVCTEIDPKLDNY	GACGGGGTCGTATGTACAGAAATTGATCCTAAACTAGATAACTAC	0	DGVVCTEIDPKLDNY	0	0	0	12	2	5	22	11	12	9	7	10	0	10	8	12	20	13	13	37	18	7	13	0	8	34	5	16	24	19	6	51	8	8	33	13
GVVCTEIDPKLDNYY	GGTGTAGTTTGCACAGAGATCGATCCCAAACTTGACAATTACTAC	0	GVVCTEIDPKLDNYY	0	0	0	10	25	1	17	40	0	5	38	0	3	20	0	12	25	17	22	47	26	10	16	0	9	20	1	24	15	35	1	20	4	13	23	7
VVCTEIDPKLDNYYK	GTCGTTTGCACAGAAATAGACCCAAAACTGGATAATTATTACAAG	0	VVCTEIDPKLDNYYK	0	0	0	4	6	7	9	6	5	3	3	5	0	3	1	8	16	20	17	15	12	6	15	0	6	10	3	10	13	14	2	8	0	5	4	4
VCTEIDPKLDNYYKK	GTTTGTACGGAAATCGATCCTAAATTGGACAATTACTACAAAAAG	0	VCTEIDPKLDNYYKK	0	0	0	1	7	9	6	19	7	4	4	8	1	9	1	23	13	16	27	17	11	8	21	0	12	6	3	21	20	15	6	9	3	24	15	6
CTEIDPKLDNYYKKD	TGTACCGAGATCGATCCTAAATTAGATAATTACTACAAAAAGGAC	0	CTEIDPKLDNYYKKD	0	0	0	0	4	1	8	7	6	8	2	4	1	1	2	3	6	10	21	10	0	4	9	0	6	0	3	17	10	0	2	0	3	12	3	3
TEIDPKLDNYYKKDN	ACCGAGATAGACCCAAAGTTAGATAATTATTATAAAAAAGATAAT	0	TEIDPKLDNYYKKDN	1	0	0	0	8	0	0	12	0	0	5	0	0	2	0	3	3	4	1	7	3	3	9	0	1	2	2	4	3	10	0	0	0	2	4	6
EIDPKLDNYYKKDNS	GAAATAGACCCAAAGTTGGACAATTATTACAAAAAGGATAACAGT	0	EIDPKLDNYYKKDNS	0	0	0	11	19	0	51	25	1	44	19	0	9	12	0	18	25	13	29	19	7	8	26	0	19	9	5	29	20	4	10	9	2	21	20	4
IDPKLDNYYKKDNSY	ATAGATCCCAAACTTGATAATTACTACAAGAAAGACAATAGTTAT	0	IDPKLDNYYKKDNSY	0	0	2	18	0	9	40	2	3	58	1	0	48	0	0	15	23	10	30	28	6	0	17	4	53	1	1	9	19	13	60	0	0	22	12	1
DPKLDNYYKKDNSYF	GATCCGAAACTAGATAACTACTATAAGAAGGACAATTCTTATTTT	0	DPKLDNYYKKDNSYF	0	0	0	10	1	1	19	2	1	54	0	0	34	0	0	8	12	6	18	11	3	2	12	0	37	1	2	3	4	5	48	0	0	15	7	1
PKLDNYYKKDNSYFT	CCCAAGTTAGATAATTATTATAAAAAAGATAACTCTTACTTTACA	0	PKLDNYYKKDNSYFT	0	0	0	5	0	2	5	0	0	9	0	0	1	0	0	3	14	8	18	3	6	2	6	1	9	0	0	7	2	7	9	0	0	12	2	0
KLDNYYKKDNSYFTE	AAACTTGATAATTACTACAAGAAAGATAACTCCTATTTTACAGAA	0	KLDNYYKKDNSYFTE	0	0	0	13	0	1	15	0	2	15	0	1	5	0	0	11	21	12	33	7	6	5	19	1	18	1	1	24	3	9	9	0	0	33	1	4
LDNYYKKDNSYFTEQ	CTGGATAATTATTACAAGAAAGACAATTCCTACTTTACAGAACAA	0	LDNYYKKDNSYFTEQ	0	0	1	16	0	4	31	0	7	39	0	4	25	0	0	17	13	9	40	2	19	5	16	0	62	0	1	21	9	43	41	1	0	38	3	7
DNYYKKDNSYFTEQP	GATAATTATTACAAGAAGGATAACAGTTATTTCACTGAACAGCCT	0	DNYYKKDNSYFTEQP	1	0	1	30	0	4	53	0	4	96	1	2	33	1	0	13	19	13	36	8	20	2	10	0	45	0	3	14	7	25	25	0	0	31	3	4
NYYKKDNSYFTEQPI	AATTACTATAAGAAGGATAATTCTTATTTTACTGAGCAACCCATA	0	NYYKKDNSYFTEQPI	0	0	0	16	2	2	57	0	9	91	0	1	48	0	4	8	4	5	28	3	16	2	4	0	31	0	4	7	2	27	33	1	1	19	3	10
YYKKDNSYFTEQPID	TACTATAAAAAGGATAATTCTTATTTTACCGAACAGCCAATAGAT	0	YYKKDNSYFTEQPID	0	0	0	8	3	1	11	1	0	27	0	0	14	0	0	7	10	10	22	5	2	2	7	0	25	0	1	9	6	10	13	0	0	20	0	1
YKKDNSYFTEQPIDL	TACAAAAAGGACAATTCCTATTTCACGGAGCAACCAATTGACTTG	0	YKKDNSYFTEQPIDL	0	0	0	0	0	0	3	0	0	6	0	0	2	0	0	7	6	1	7	0	8	1	5	0	9	0	1	1	0	14	13	0	1	9	0	7
KKDNSYFTEQPIDLV	AAGAAAGATAACAGCTACTTTACAGAACAACCAATAGATCTTGTT	0	KKDNSYFTEQPIDLV	0	0	0	5	0	0	5	0	0	3	0	0	0	0	0	17	35	21	36	5	9	12	29	0	21	1	1	30	12	11	6	0	0	14	1	1
KDNSYFTEQPIDLVP	AAGGACAATTCCTATTTCACTGAACAGCCTATTGACCTAGTTCCT	0	KDNSYFTEQPIDLVP	0	1	0	9	4	1	23	2	2	26	0	5	9	0	4	32	38	28	53	11	17	7	34	4	51	1	16	46	5	46	19	0	6	36	2	19
DNSYFTEQPIDLVPN	GACAATAGCTATTTCACAGAACAGCCAATAGATTTAGTTCCGAAT	0	DNSYFTEQPIDLVPN	0	0	0	12	5	25	32	16	93	19	3	83	8	1	84	26	37	22	48	57	65	8	17	0	51	30	99	22	45	58	17	19	97	47	29	78
NSYFTEQPIDLVPNQ	AATTCATACTTCACTGAACAGCCAATCGATCTAGTTCCTAATCAG	0	NSYFTEQPIDLVPNQ	0	0	0	8	13	25	11	21	76	13	21	87	7	18	123	12	17	13	21	50	55	4	17	0	39	30	89	21	21	27	7	34	95	39	37	33
SYFTEQPIDLVPNQP	AGTTATTTTACTGAACAACCAATAGACCTAGTGCCAAATCAACCG	0	SYFTEQPIDLVPNQP	0	0	0	4	2	10	9	4	18	14	6	20	1	0	39	7	4	6	10	9	13	2	4	0	7	6	23	5	6	8	2	8	24	13	3	13
YFTEQPIDLVPNQPY	TACTTCACAGAACAACCAATTGATTTAGTTCCCAATCAACCATAC	0	YFTEQPIDLVPNQPY	0	0	0	7	5	8	6	3	10	8	2	14	1	1	5	16	10	10	28	33	28	9	12	3	31	4	18	16	20	34	14	0	5	26	12	22
FTEQPIDLVPNQPYP	TTCACTGAACAGCCAATAGACTTAGTTCCAAACCAACCTTACCCT	0	FTEQPIDLVPNQPYP	0	0	0	0	9	17	0	6	30	0	0	13	0	1	9	21	14	12	16	32	29	13	17	0	4	12	14	17	27	57	0	8	3	2	12	9
TEQPIDLVPNQPYPN	ACCGAGCAACCTATTGATTTGGTTCCTAATCAGCCCTACCCTAAC	0	TEQPIDLVPNQPYPN	0	0	0	0	1	4	1	1	19	0	4	12	1	1	3	18	13	18	16	26	3	5	15	2	2	15	4	8	16	6	0	12	1	2	12	6
EQPIDLVPNQPYPNA	GAGCAACCAATAGATCTTGTTCCGAACCAGCCATACCCTAACGCA	0	EQPIDLVPNQPYPNA	0	0	0	0	22	5	0	33	8	0	21	13	0	16	2	26	27	18	17	53	56	9	15	0	2	22	46	25	34	84	2	8	9	9	18	21
QPIDLVPNQPYPNAS	CAACCGATCGATCTAGTGCCAAACCAGCCATATCCCAACGCGAGT	0	QPIDLVPNQPYPNAS	0	0	0	0	4	10	0	4	41	0	6	29	0	12	10	18	14	17	15	39	25	8	16	0	0	23	22	13	34	38	0	18	8	3	12	22
PIDLVPNQPYPNASF	CCGATAGACCTAGTACCAAATCAGCCATATCCAAACGCTTCTTTT	0	PIDLVPNQPYPNASF	0	0	0	0	9	12	1	12	11	0	0	9	0	0	1	17	18	21	10	4	6	12	34	0	3	0	7	5	1	21	1	0	0	0	2	12
IDLVPNQPYPNASFD	ATCGATTTGGTCCCCAATCAACCCTATCCTAACGCATCGTTTGAT	0	IDLVPNQPYPNASFD	0	0	0	0	1	0	4	1	0	1	0	0	0	0	0	11	22	15	7	13	13	4	11	0	3	1	3	17	6	26	1	1	0	2	2	9
DLVPNQPYPNASFDN	GATCTTGTTCCCAACCAACCATACCCTAATGCATCTTTTGATAAT	0	DLVPNQPYPNASFDN	0	0	0	0	2	1	0	3	3	0	2	3	0	1	2	22	17	12	13	31	12	9	27	1	1	2	5	14	22	20	0	1	0	5	5	7
LVPNQPYPNASFDNF	CTTGTTCCAAATCAACCTTACCCTAACGCGAGCTTTGACAATTTT	0	LVPNQPYPNASFDNF	0	0	0	0	1	8	0	0	2	0	0	4	0	0	0	36	22	18	23	22	3	20	20	1	4	2	1	19	16	6	1	0	0	4	1	6
VPNQPYPNASFDNFK	GTTCCAAACCAACCCTACCCCAATGCATCATTTGATAATTTCAAG	0	VPNQPYPNASFDNFK	0	0	0	0	0	0	0	0	0	1	0	0	0	0	0	16	22	16	9	6	6	4	15	0	2	1	1	10	7	12	1	0	0	3	1	3
PNQPYPNASFDNFKF	CCAAACCAACCATATCCTAATGCCTCGTTTGACAATTTTAAATTT	0	PNQPYPNASFDNFKF	0	0	0	0	1	3	0	0	2	0	0	1	0	0	0	21	22	13	7	11	9	5	17	0	0	0	6	9	10	15	1	0	2	2	0	11
NQPYPNASFDNFKFV	AACCAACCATATCCTAATGCATCATTCGATAATTTTAAATTTGTC	0	NQPYPNASFDNFKFV	0	0	0	1	0	5	1	0	0	0	0	0	0	0	0	12	14	11	6	4	1	10	17	0	0	0	9	10	7	2	0	0	2	0	1	3
QPYPNASFDNFKFVC	CAACCTTACCCAAACGCCTCTTTCGATAATTTCAAGTTCGTATGT	0	QPYPNASFDNFKFVC	0	0	0	14	22	16	29	43	32	42	43	9	16	22	7	20	16	15	30	19	17	7	9	0	9	7	8	28	14	40	10	1	4	12	3	6
PYPNASFDNFKFVCD	CCATACCCTAACGCTTCGTTTGATAATTTTAAATTTGTTTGCGAC	0	PYPNASFDNFKFVCD	0	0	0	7	1	9	28	4	14	32	4	18	14	1	1	8	15	9	16	21	24	2	10	1	13	2	11	14	19	28	7	4	3	15	12	8
YPNASFDNFKFVCDN	TACCCCAATGCATCCTTTGATAATTTTAAATTTGTCTGTGATAAC	0	YPNASFDNFKFVCDN	1	0	1	13	13	6	35	20	18	48	34	19	36	26	27	9	12	15	50	40	34	3	8	0	74	31	35	20	23	21	59	28	41	32	27	38
PNASFDNFKFVCDNI	CCCAACGCAAGTTTTGACAATTTTAAATTTGTTTGCGACAATATT	0	PNASFDNFKFVCDNI	1	0	1	43	35	48	94	108	155	195	179	221	199	161	298	20	26	20	73	110	80	2	16	0	134	106	110	14	38	51	146	172	151	32	74	32
NASFDNFKFVCDNIK	AACGCATCCTTTGATAATTTCAAGTTTGTTTGTGATAATATAAAA	0	NASFDNFKFVCDNIK	0	0	0	11	9	8	26	20	36	66	20	49	69	7	31	10	17	11	26	59	9	0	12	1	63	31	14	10	23	12	71	33	14	19	25	18
ASFDNFKFVCDNIKF	GCTTCATTTGACAATTTTAAATTTGTGTGTGATAACATTAAGTTT	0	ASFDNFKFVCDNIKF	0	0	0	15	18	12	48	39	42	85	29	40	71	10	27	8	9	6	20	27	19	1	16	1	62	25	21	8	15	28	58	19	31	18	16	27
SFDNFKFVCDNIKFA	TCGTTCGACAATTTCAAATTTGTTTGTGATAACATTAAATTCGCC	0	SFDNFKFVCDNIKFA	0	0	0	10	3	4	19	5	8	56	6	10	37	1	4	3	4	5	15	28	22	3	8	0	24	13	21	2	16	22	30	10	28	11	11	20
FDNFKFVCDNIKFAD	TTTGATAATTTCAAGTTTGTTTGTGACAATATCAAGTTTGCAGAT	0	FDNFKFVCDNIKFAD	0	0	0	13	9	23	40	20	101	57	16	90	64	17	78	14	19	14	75	110	43	2	10	2	100	83	45	8	50	38	91	90	35	38	60	46
DNFKFVCDNIKFADD	GATAACTTTAAATTTGTTTGTGATAATATTAAATTCGCTGATGAT	0	DNFKFVCDNIKFADD	2	0	0	24	48	22	60	135	54	133	161	65	118	78	39	18	22	11	67	80	109	0	15	1	100	95	99	12	35	67	104	86	96	37	63	114
NFKFVCDNIKFADDL	AATTTTAAATTTGTGTGCGACAACATAAAGTTCGCAGATGATTTG	0	NFKFVCDNIKFADDL	0	0	1	20	34	29	73	66	110	115	59	120	96	56	129	22	15	13	55	101	77	6	13	0	110	92	119	9	32	78	136	103	150	41	50	86
FKFVCDNIKFADDLN	TTCAAATTTGTATGCGATAATATAAAATTTGCGGACGATTTGAAC	0	FKFVCDNIKFADDLN	0	0	0	1	0	0	0	0	0	0	0	1	0	0	0	13	17	5	5	0	2	4	16	1	0	0	1	1	0	2	0	0	0	1	0	1
KFVCDNIKFADDLNQ	AAATTTGTTTGTGATAATATTAAATTTGCAGACGACCTTAATCAA	0	KFVCDNIKFADDLNQ	0	0	0	14	18	20	40	35	76	74	43	66	63	15	86	19	13	8	31	58	47	2	10	0	50	26	41	5	20	15	56	33	52	28	35	33
FVCDNIKFADDLNQL	TTCGTTTGTGATAATATTAAATTTGCAGATGATTTAAACCAGTTG	0	FVCDNIKFADDLNQL	0	0	0	8	11	16	26	35	45	46	47	50	34	23	54	14	11	9	46	47	51	5	11	0	74	44	77	8	6	33	58	49	125	21	31	34
VCDNIKFADDLNQLT	GTTTGTGATAACATCAAATTTGCGGATGATTTGAACCAATTGACT	0	VCDNIKFADDLNQLT	1	0	0	26	29	20	46	92	87	99	79	84	61	33	111	23	14	18	41	39	95	0	12	1	75	32	138	14	19	50	103	36	154	34	38	45
CDNIKFADDLNQLTG	TGTGATAATATAAAATTTGCCGATGATTTGAACCAACTCACTGGA	0	CDNIKFADDLNQLTG	0	0	0	11	14	14	40	33	70	74	48	72	74	22	110	12	8	9	29	23	56	2	15	1	52	7	92	7	12	39	72	18	115	16	18	44
DNIKFADDLNQLTGY	GACAATATCAAATTTGCAGATGACCTGAATCAATTGACGGGTTAT	0	DNIKFADDLNQLTGY	0	0	0	21	34	22	73	112	47	148	172	53	158	237	120	13	25	19	52	118	98	2	10	0	93	151	146	10	34	38	115	194	196	26	58	30
NIKFADDLNQLTGYK	AATATCAAATTCGCAGATGATCTTAACCAATTAACCGGCTACAAA	0	NIKFADDLNQLTGYK	0	0	1	10	42	7	61	78	47	104	130	42	124	176	88	12	15	8	28	52	37	1	6	1	58	79	72	5	16	17	81	122	113	12	33	34
IKFADDLNQLTGYKK	ATTAAATTTGCCGATGATTTGAATCAACTTACCGGGTATAAAAAA	0	IKFADDLNQLTGYKK	0	0	0	11	30	12	28	49	27	21	32	22	16	11	16	10	18	6	22	37	23	2	7	0	21	20	21	7	8	14	23	13	10	10	16	14
KFADDLNQLTGYKKP	AAATTTGCCGACGACTTAAATCAATTAACCGGTTACAAAAAGCCA	0	KFADDLNQLTGYKKP	0	0	0	10	1	1	54	0	1	71	1	0	80	0	0	9	15	4	25	2	4	0	16	0	53	0	1	9	4	8	45	1	0	8	1	1
FADDLNQLTGYKKPA	TTTGCGGATGACTTGAATCAATTAACCGGTTACAAGAAACCTGCC	0	FADDLNQLTGYKKPA	0	0	0	11	0	0	31	0	0	38	0	0	28	0	0	10	8	6	25	2	3	1	15	0	30	0	1	8	2	10	28	0	0	19	0	0
ADDLNQLTGYKKPAS	GCAGACGATCTAAACCAGCTTACTGGCTATAAGAAGCCTGCAAGT	0	ADDLNQLTGYKKPAS	0	0	0	0	0	1	0	0	1	0	0	5	0	0	0	19	13	12	6	2	8	3	13	0	0	0	0	6	1	29	1	0	1	0	0	3
DDLNQLTGYKKPASR	GATGATTTAAACCAATTGACAGGTTACAAGAAACCCGCTAGCAGA	0	DDLNQLTGYKKPASR	0	0	0	0	0	0	0	0	0	0	0	0	0	0	0	0	0	0	0	0	0	1	1	0	0	0	0	0	0	0	0	0	0	0	0	0
DLNQLTGYKKPASRE	GATTTAAACCAATTGACTGGGTACAAGAAACCCGCATCACGTGAG	0	DLNQLTGYKKPASRE	0	0	0	1	0	1	0	0	10	1	0	5	0	0	3	11	19	11	1	10	8	9	7	0	0	1	4	3	7	40	0	0	0	0	2	2
LNQLTGYKKPASREL	TTGAATCAGTTAACAGGTTATAAGAAACCTGCATCTAGGGAACTA	0	LNQLTGYKKPASREL	0	0	0	0	0	0	0	0	0	0	1	1	0	0	0	18	29	15	3	0	0	13	17	0	0	0	0	1	0	0	0	0	0	1	0	0
NQLTGYKKPASRELK	AACCAACTAACGGGTTACAAAAAACCGGCTAGCAGAGAATTGAAG	0	NQLTGYKKPASRELK	0	0	0	1	0	0	1	0	0	0	0	0	0	0	0	18	17	14	4	2	2	10	22	0	4	0	0	2	2	1	1	0	0	0	0	0
QLTGYKKPASRELKV	CAGCTGACGGGTTACAAAAAACCAGCTTCTAGAGAATTAAAAGTC	0	QLTGYKKPASRELKV	0	0	0	0	0	1	0	0	0	0	0	0	0	0	0	15	15	13	6	2	2	12	18	0	0	1	0	5	3	3	0	0	0	2	1	0
LTGYKKPASRELKVT	CTGACAGGTTATAAAAAGCCAGCCAGTAGAGAATTGAAGGTCACG	0	LTGYKKPASRELKVT	0	0	0	1	0	0	0	0	0	0	0	0	0	0	0	12	14	6	1	2	1	5	7	0	1	0	0	0	0	0	0	0	1	1	0	2
TGYKKPASRELKVTF	ACAGGTTATAAGAAACCGGCTAGCAGAGAATTGAAGGTTACTTTT	0	TGYKKPASRELKVTF	0	0	0	0	0	0	0	0	0	0	0	0	0	0	0	17	22	15	8	4	14	11	10	2	3	1	4	13	4	29	0	1	1	2	1	5
GYKKPASRELKVTFF	GGGTATAAAAAACCAGCTTCCAGGGAATTGAAAGTTACATTTTTC	0	GYKKPASRELKVTFF	0	0	0	1	0	9	2	0	7	0	0	1	0	0	0	10	9	10	6	1	5	8	8	1	2	0	0	4	1	20	0	0	0	2	0	1
YKKPASRELKVTFFP	TACAAAAAACCGGCCAGTAGAGAACTTAAAGTTACCTTCTTTCCT	0	YKKPASRELKVTFFP	0	0	0	4	10	3	4	13	1	5	3	0	0	2	0	26	28	21	9	9	5	10	19	1	2	0	1	9	3	8	2	2	0	2	2	0
KKPASRELKVTFFPD	AAAAAACCAGCTTCTAGAGAGTTAAAGGTCACTTTTTTCCCGGAT	0	KKPASRELKVTFFPD	0	0	0	0	0	5	0	0	12	0	0	12	0	0	11	5	10	6	10	0	9	1	2	0	7	0	6	5	0	8	2	0	6	4	0	10
KPASRELKVTFFPDL	AAACCAGCGTCAAGGGAACTGAAGGTAACATTCTTCCCAGATCTT	0	KPASRELKVTFFPDL	0	0	1	19	16	17	32	22	46	36	17	55	6	13	51	22	20	18	35	38	66	8	20	0	22	9	88	19	19	50	5	7	93	35	8	51
PASRELKVTFFPDLN	CCCGCATCGAGAGAATTAAAAGTGACGTTCTTCCCTGATCTTAAC	0	PASRELKVTFFPDLN	0	0	0	15	8	17	30	12	65	36	7	52	18	2	55	13	24	19	56	28	50	6	13	2	47	5	56	33	20	69	48	5	44	51	11	55
ASRELKVTFFPDLNG	GCTAGTAGAGAATTGAAAGTAACATTCTTCCCAGATTTAAATGGT	0	ASRELKVTFFPDLNG	0	0	0	11	24	43	14	22	107	38	10	125	29	10	150	12	26	10	46	40	68	4	26	0	59	13	119	22	20	36	65	6	120	46	18	45
SRELKVTFFPDLNGD	TCCCGTGAGCTGAAAGTGACTTTTTTTCCTGACCTAAATGGCGAT	0	SRELKVTFFPDLNGD	0	0	1	13	82	40	81	121	115	117	120	110	58	62	155	12	30	26	54	51	131	2	25	0	53	32	236	34	37	87	40	21	258	60	28	103
RELKVTFFPDLNGDV	AGGGAACTAAAGGTGACTTTTTTTCCTGACTTAAATGGTGATGTG	0	RELKVTFFPDLNGDV	1	0	0	20	45	35	54	91	110	82	79	124	60	26	157	23	45	23	71	80	131	11	33	1	85	46	179	42	39	75	74	36	249	75	43	77
ELKVTFFPDLNGDVV	GAACTAAAGGTAACATTCTTTCCAGACCTGAATGGTGATGTCGTA	0	ELKVTFFPDLNGDVV	0	0	1	10	20	33	46	12	129	68	7	141	60	6	231	13	33	26	68	48	136	5	24	1	111	28	267	17	27	53	107	10	289	47	29	91
LKVTFFPDLNGDVVA	CTCAAGGTAACTTTTTTCCCCGATCTGAACGGTGATGTGGTTGCT	0	LKVTFFPDLNGDVVA	0	0	0	23	2	23	38	2	64	53	2	31	18	0	25	17	27	24	45	15	25	6	14	0	41	1	12	21	5	16	41	0	6	29	3	2
KVTFFPDLNGDVVAI	AAAGTAACGTTTTTCCCGGATCTCAACGGAGATGTCGTTGCCATA	0	KVTFFPDLNGDVVAI	0	0	0	6	6	8	20	6	34	39	9	37	33	6	59	2	4	1	13	14	7	0	6	0	24	8	15	5	4	7	22	9	21	7	4	7
VTFFPDLNGDVVAID	GTAACCTTTTTTCCAGACTTAAATGGCGATGTTGTGGCAATTGAC	0	VTFFPDLNGDVVAID	0	0	1	38	25	32	134	35	107	206	11	117	154	6	125	21	28	22	89	17	71	5	27	2	116	4	108	22	11	59	120	1	122	66	6	54
TFFPDLNGDVVAIDY	ACGTTTTTTCCCGATTTAAACGGTGACGTTGTAGCAATCGATTAC	0	TFFPDLNGDVVAIDY	0	0	0	26	0	6	89	0	3	136	0	2	174	0	1	26	16	21	67	6	20	1	11	1	122	1	4	10	6	38	120	0	1	41	4	8
FFPDLNGDVVAIDYK	TTTTTTCCAGACCTTAACGGTGATGTCGTTGCGATCGATTATAAA	0	FFPDLNGDVVAIDYK	0	0	0	10	4	5	56	2	4	80	0	2	44	0	0	19	22	12	51	4	11	0	25	1	75	1	4	14	3	34	63	4	2	40	9	7
FPDLNGDVVAIDYKH	TTTCCTGATTTAAACGGTGATGTTGTCGCTATCGATTATAAACAT	0	FPDLNGDVVAIDYKH	0	0	0	0	0	2	0	0	4	0	0	4	0	0	1	20	22	16	14	13	24	15	12	2	5	0	11	19	10	68	1	1	4	5	3	15
PDLNGDVVAIDYKHY	CCTGACCTCAACGGTGACGTTGTGGCCATTGACTACAAACATTAT	0	PDLNGDVVAIDYKHY	0	0	0	0	1	4	0	1	10	0	4	5	0	2	2	17	35	23	36	26	26	6	25	0	5	5	8	29	23	32	1	2	5	6	6	9
DLNGDVVAIDYKHYT	GATTTAAATGGTGATGTGGTAGCTATAGATTATAAACATTATACA	0	DLNGDVVAIDYKHYT	0	0	0	0	6	4	2	2	0	0	0	1	0	0	0	11	8	8	11	10	17	10	14	0	5	1	9	15	3	25	1	1	7	5	1	15
LNGDVVAIDYKHYTP	CTAAACGGGGATGTCGTGGCAATTGATTATAAACATTATACCCCG	0	LNGDVVAIDYKHYTP	0	0	0	0	3	5	0	1	18	0	2	17	0	0	6	8	9	6	4	9	25	2	4	0	1	0	20	7	6	17	1	5	6	4	2	25
NGDVVAIDYKHYTPS	AACGGTGATGTCGTAGCTATAGATTACAAGCACTATACACCCTCT	0	NGDVVAIDYKHYTPS	0	0	0	10	0	7	10	0	15	8	0	10	1	0	8	22	20	24	9	12	29	8	21	0	3	2	26	13	11	55	1	1	12	5	2	29
GDVVAIDYKHYTPSF	GGTGATGTGGTAGCAATAGATTATAAACATTATACACCTTCTTTC	0	GDVVAIDYKHYTPSF	0	0	0	2	7	21	0	12	93	0	6	85	0	3	72	22	19	15	12	51	56	19	26	0	10	9	81	13	33	37	2	7	71	5	13	65
DVVAIDYKHYTPSFK	GATGTCGTTGCAATTGATTACAAACACTACACGCCTTCCTTCAAG	0	DVVAIDYKHYTPSFK	0	0	0	4	1	16	3	0	69	0	0	46	0	0	23	22	34	32	29	45	64	13	24	1	3	3	63	11	26	69	0	1	41	3	7	80
VVAIDYKHYTPSFKK	GTGGTAGCTATCGACTATAAGCACTACACCCCCTCCTTCAAAAAG	0	VVAIDYKHYTPSFKK	0	0	0	2	0	3	2	0	3	0	0	2	0	0	0	22	27	24	16	13	5	12	20	1	2	0	2	23	15	13	1	0	1	2	1	2
VAIDYKHYTPSFKKG	GTTGCCATTGATTACAAGCATTATACTCCATCGTTCAAGAAAGGT	0	VAIDYKHYTPSFKKG	0	0	0	0	0	0	0	0	0	0	0	0	0	0	0	0	0	0	0	0	0	0	0	0	0	0	0	0	0	0	0	0	0	0	0	0
AIDYKHYTPSFKKGA	GCAATAGATTATAAGCACTATACGCCATCCTTCAAGAAAGGAGCT	0	AIDYKHYTPSFKKGA	0	0	0	0	0	4	0	0	7	0	0	7	1	0	2	16	19	15	3	9	2	13	15	0	4	0	0	4	2	5	1	2	0	0	0	0
IDYKHYTPSFKKGAK	ATCGACTATAAACACTATACACCTTCTTTTAAAAAGGGTGCTAAA	0	IDYKHYTPSFKKGAK	0	0	0	0	0	0	0	0	0	0	0	0	0	0	0	18	23	6	0	1	1	8	11	0	4	0	2	1	2	3	0	0	0	0	0	1
DYKHYTPSFKKGAKL	GATTACAAGCACTATACTCCAAGCTTTAAAAAGGGTGCTAAGTTG	0	DYKHYTPSFKKGAKL	0	0	0	0	0	0	0	0	0	0	0	0	0	0	0	25	18	15	9	15	2	15	28	2	1	3	2	8	3	10	0	2	0	1	1	1
YKHYTPSFKKGAKLL	TATAAGCATTATACACCTTCCTTCAAGAAAGGTGCCAAGTTATTG	0	YKHYTPSFKKGAKLL	0	0	0	0	0	0	0	0	1	0	0	0	0	0	1	22	21	18	2	2	0	9	15	1	4	0	0	4	2	0	0	0	0	0	0	0
KHYTPSFKKGAKLLH	AAGCATTACACTCCAAGTTTCAAGAAGGGTGCTAAACTATTGCAT	0	KHYTPSFKKGAKLLH	0	0	0	0	0	0	0	0	0	0	0	0	0	0	1	28	32	25	8	5	0	10	24	1	1	0	0	6	3	0	1	1	0	0	3	0
HYTPSFKKGAKLLHK	CATTACACTCCATCGTTCAAAAAAGGCGCTAAACTGCTTCACAAA	0	HYTPSFKKGAKLLHK	0	0	0	0	0	0	0	0	0	0	0	0	0	0	0	20	19	8	2	4	0	12	17	0	1	1	0	2	2	0	0	0	0	0	2	0
YTPSFKKGAKLLHKP	TACACTCCTTCTTTTAAAAAAGGAGCGAAGTTGTTACATAAACCA	0	YTPSFKKGAKLLHKP	0	0	0	0	0	0	0	0	0	0	0	0	0	0	0	6	13	9	2	0	0	7	14	1	0	0	0	2	0	0	0	0	0	0	0	0
TPSFKKGAKLLHKPI	ACTCCTTCGTTCAAGAAGGGTGCTAAGCTTCTTCATAAGCCGATA	0	TPSFKKGAKLLHKPI	0	0	0	0	0	0	0	0	0	0	0	0	0	0	0	12	18	19	2	11	6	10	13	1	4	0	0	3	7	15	0	0	0	1	2	2
PSFKKGAKLLHKPIV	CCCTCTTTTAAGAAAGGCGCTAAATTGTTACATAAACCTATCGTC	0	PSFKKGAKLLHKPIV	0	0	0	1	0	0	3	0	0	5	0	0	0	0	0	12	23	11	2	19	2	11	13	0	1	6	1	1	12	6	1	0	0	1	2	2
SFKKGAKLLHKPIVW	TCGTTCAAGAAAGGTGCGAAGCTTTTACATAAACCGATCGTGTGG	0	SFKKGAKLLHKPIVW	0	0	0	0	0	0	0	0	2	0	0	3	0	0	0	16	33	16	0	3	1	13	20	0	0	0	1	5	5	1	2	0	1	0	0	1
FKKGAKLLHKPIVWH	TTTAAGAAGGGTGCAAAATTGTTACACAAGCCCATCGTGTGGCAC	0	FKKGAKLLHKPIVWH	0	0	0	3	0	0	5	0	0	0	0	0	0	0	0	10	9	10	3	3	0	4	10	0	3	0	0	2	0	5	0	0	0	1	0	0
KKGAKLLHKPIVWHV	AAAAAGGGTGCAAAGCTGCTACACAAACCCATTGTCTGGCACGTG	0	KKGAKLLHKPIVWHV	0	0	0	0	0	3	1	0	9	0	0	4	0	0	0	22	24	17	7	31	13	9	20	1	4	6	3	5	17	27	1	5	0	0	7	2
KGAKLLHKPIVWHVN	AAAGGTGCAAAGTTGCTGCACAAACCGATTGTTTGGCACGTAAAT	0	KGAKLLHKPIVWHVN	1	0	0	0	35	24	0	85	72	1	91	46	1	90	10	25	26	19	13	124	27	10	28	1	7	70	13	8	54	34	1	79	6	4	36	20
GAKLLHKPIVWHVNN	GGGGCTAAGTTGTTACACAAACCAATTGTGTGGCACGTCAATAAT	0	GAKLLHKPIVWHVNN	0	0	0	5	36	40	1	125	87	0	173	64	3	190	41	18	39	22	26	137	46	11	18	2	30	111	30	35	39	91	6	148	41	22	59	46
AKLLHKPIVWHVNNA	GCAAAATTGCTTCATAAACCAATAGTCTGGCATGTTAATAACGCC	0	AKLLHKPIVWHVNNA	0	0	0	1	8	11	6	27	23	3	49	28	0	59	17	6	7	4	8	17	13	4	4	0	8	27	24	5	10	16	1	33	11	16	15	15
KLLHKPIVWHVNNAT	AAATTATTACATAAGCCTATAGTGTGGCATGTGAACAATGCTACC	0	KLLHKPIVWHVNNAT	0	0	0	0	2	0	0	11	0	0	13	0	0	6	0	7	4	5	6	15	3	1	0	0	1	12	1	2	9	16	2	15	0	1	9	5
LLHKPIVWHVNNATN	TTGTTACATAAACCGATTGTCTGGCACGTTAACAACGCAACTAAT	0	LLHKPIVWHVNNATN	0	0	0	9	51	10	14	107	7	8	70	4	0	67	8	26	26	22	34	182	42	8	20	0	19	119	22	21	33	45	2	102	9	13	62	14
LHKPIVWHVNNATNK	TTACATAAACCTATTGTCTGGCATGTCAACAACGCTACTAACAAA	0	LHKPIVWHVNNATNK	0	0	0	2	87	15	1	204	23	2	337	30	1	731	28	35	26	16	33	318	27	5	21	0	8	421	26	28	34	16	7	713	36	21	122	31
HKPIVWHVNNATNKA	CACAAACCAATAGTGTGGCATGTGAACAATGCAACAAATAAGGCG	0	HKPIVWHVNNATNKA	0	0	0	1	18	3	3	70	12	2	95	11	1	102	15	10	9	13	5	101	15	2	13	0	0	115	13	0	14	23	0	170	12	0	77	17
KPIVWHVNNATNKAT	AAACCTATTGTATGGCACGTGAATAATGCAACAAACAAGGCAACT	0	KPIVWHVNNATNKAT	0	0	0	0	48	1	1	185	3	1	309	0	6	427	1	14	17	10	5	120	12	13	11	0	1	154	13	5	16	20	3	247	11	1	54	5
PIVWHVNNATNKATY	CCAATTGTATGGCATGTGAATAACGCCACTAATAAGGCAACGTAC	0	PIVWHVNNATNKATY	0	0	0	0	0	0	0	0	0	0	0	0	0	0	0	21	19	12	12	10	3	6	15	1	0	3	0	8	6	1	0	6	0	2	3	2
IVWHVNNATNKATYK	ATTGTTTGGCACGTCAATAATGCTACCAATAAAGCCACTTATAAG	0	IVWHVNNATNKATYK	0	0	0	0	0	0	0	0	0	0	0	0	0	0	0	8	18	9	1	4	0	8	13	0	1	1	0	1	0	0	0	0	0	0	0	0
VWHVNNATNKATYKP	GTGTGGCACGTTAACAATGCTACGAATAAAGCAACCTACAAGCCT	0	VWHVNNATNKATYKP	0	0	0	0	0	4	0	0	3	0	0	0	0	0	0	19	34	13	2	0	0	6	13	0	3	0	0	3	0	0	2	0	0	2	1	0
WHVNNATNKATYKPN	TGGCACGTTAACAATGCCACTAACAAAGCTACGTATAAACCAAAT	0	WHVNNATNKATYKPN	0	0	0	0	12	2	0	5	5	0	4	1	0	2	0	23	32	16	10	60	7	14	14	1	3	10	2	19	28	13	2	10	0	6	21	1
HVNNATNKATYKPNT	CATGTAAATAACGCCACTAATAAGGCGACATACAAGCCGAACACC	0	HVNNATNKATYKPNT	0	0	0	0	6	0	0	7	0	0	6	0	0	1	0	1	4	1	2	5	0	2	2	0	0	1	0	1	6	0	0	0	0	1	2	0
VNNATNKATYKPNTW	GTTAATAACGCAACAAATAAGGCTACATACAAACCAAATACGTGG	0	VNNATNKATYKPNTW	0	0	0	5	13	11	13	20	1	7	13	0	0	1	0	17	28	22	17	72	16	16	23	1	3	30	10	20	44	31	1	6	5	9	33	15
NNATNKATYKPNTWC	AATAATGCCACAAATAAGGCCACATATAAGCCTAATACTTGGTGC	0	NNATNKATYKPNTWC	1	0	0	7	14	5	18	40	9	20	36	10	1	34	0	18	19	15	35	52	21	4	14	0	16	32	14	16	24	15	3	37	5	14	32	19
NATNKATYKPNTWCI	AATGCAACCAATAAAGCTACATATAAGCCCAACACATGGTGCATT	0	NATNKATYKPNTWCI	1	0	0	9	43	17	20	110	10	17	136	12	7	137	3	22	22	19	30	125	19	5	17	1	13	83	14	22	43	40	7	138	10	23	59	20
ATNKATYKPNTWCIR	GCCACGAATAAAGCAACTTATAAGCCCAACACCTGGTGCATAAGA	0	ATNKATYKPNTWCIR	0	0	0	10	26	2	15	56	7	8	89	1	2	123	1	18	19	18	19	99	15	9	18	0	8	106	12	5	38	29	2	122	4	6	58	4
TNKATYKPNTWCIRC	ACCAATAAAGCGACTTATAAGCCCAATACCTGGTGCATTAGATGT	0	TNKATYKPNTWCIRC	0	0	0	5	22	14	5	26	18	3	16	13	0	8	3	24	26	33	20	37	11	6	21	2	5	7	2	24	24	13	1	2	1	15	11	2
NKATYKPNTWCIRCL	AACAAAGCAACATATAAACCAAACACATGGTGCATAAGGTGTTTA	0	NKATYKPNTWCIRCL	0	0	0	1	8	7	5	5	2	1	1	3	0	1	1	17	23	13	18	32	7	7	12	0	8	1	0	10	19	18	1	3	0	10	8	3
[truncated: 165,866 more rows]

## Sheet: 1B-InferredRegisters
HLA-DR401			HLA-DR402			HLA-DR404
Sequence	Register	Core	Sequence	Register	Core	Sequence	Register	Core
KDGTCGLVEVEKGVL	7	VEVEKGVLG	HVQLSLPVLQVRDVL	7	VLQVRDVLG	THVQLSLPVLQVRDV	2	VQLSLPVLQ
LEGIQYGRSGETLGV	5	YGRSGETLG	VQLSLPVLQVRDVLV	6	VLQVRDVLV	HVQLSLPVLQVRDVL	1	VQLSLPVLQ
QYGRSGETLGVLVPH	1	YGRSGETLG	QLSLPVLQVRDVLVR	5	VLQVRDVLV	QLSLPVLQVRDVLVR	5	VLQVRDVLV
KHSSGVTRELMRELN	9	LMRELNGGS	LSLPVLQVRDVLVRG	4	VLQVRDVLV	LSLPVLQVRDVLVRG	4	VLQVRDVLV
HSSGVTRELMRELNG	8	LMRELNGGG	SLPVLQVRDVLVRGF	3	VLQVRDVLV	LPVLQVRDVLVRGFG	2	VLQVRDVLV
SSGVTRELMRELNGG	7	LMRELNGGG	LPVLQVRDVLVRGFG	2	VLQVRDVLV	LQVRDVLVRGFGDSV	7	VRGFGDSVG
SGVTRELMRELNGGA	6	LMRELNGGA	PQLEQPYVFIKRSDA	9	IKRSDAGGS	DGTCGLVEVEKGVLP	8	VEKGVLPGG
GVTRELMRELNGGAY	5	LMRELNGGA	LEQPYVFIKRSDART	6	FIKRSDART	GTCGLVEVEKGVLPQ	8	EKGVLPQGG
TRELMRELNGGAYTR	3	LMRELNGGA	SGETLGVLVPHVGEI	3	TLGVLVPHV	RTAPHGHVMVELVAE	7	VMVELVAEG
RELMRELNGGAYTRY	2	LMRELNGGA	GVLVPHVGEIPVAYR	6	VGEIPVAYR	TAPHGHVMVELVAEL	10	LVAELGGSG
ELMRELNGGAYTRYV	1	LMRELNGGA	PHVGEIPVAYRKVLL	7	VAYRKVLLG	KHSSGVTRELMRELN	9	LMRELNGGS
RELNGGAYTRYVDNN	7	YTRYVDNNG	GVTRELMRELNGGAY	9	LNGGAYGGS	HSSGVTRELMRELNG	8	LMRELNGGG
LNGGAYTRYVDNNFC	5	YTRYVDNNF	TRELMRELNGGAYTR	7	LNGGAYTRG	SGVTRELMRELNGGA	6	LMRELNGGA
NGGAYTRYVDNNFCG	4	YTRYVDNNF	RELMRELNGGAYTRY	6	LNGGAYTRY	GVTRELMRELNGGAY	5	LMRELNGGA
GAYTRYVDNNFCGPD	2	YTRYVDNNF	ELMRELNGGAYTRYV	5	LNGGAYTRY	TRELMRELNGGAYTR	3	LMRELNGGA
DGYPLECIKDLLARA	4	LECIKDLLA	GPDGYPLECIKDLLA	6	LECIKDLLA	RELMRELNGGAYTRY	2	LMRELNGGA
SEQLDFIDTKRGVYC	3	LDFIDTKRG	PDGYPLECIKDLLAR	5	LECIKDLLA	ELMRELNGGAYTRYV	1	LMRELNGGA
EQLDFIDTKRGVYCC	2	LDFIDTKRG	ECIKDLLARAGKASC	2	IKDLLARAG	GPDGYPLECIKDLLA	9	IKDLLAGGS
QLDFIDTKRGVYCCR	1	LDFIDTKRG	CTLSEQLDFIDTKRG	6	LDFIDTKRG	DGYPLECIKDLLARA	7	IKDLLARAG
REHEHEIAWYTERSE	8	WYTERSEGG	TLSEQLDFIDTKRGV	5	LDFIDTKRG	ASCTLSEQLDFIDTK	0	ASCTLSEQL
EHEHEIAWYTERSEK	7	WYTERSEKG	LSEQLDFIDTKRGVY	4	LDFIDTKRG	SCTLSEQLDFIDTKR	7	LDFIDTKRG
HEHEIAWYTERSEKS	6	WYTERSEKS	SEQLDFIDTKRGVYC	3	LDFIDTKRG	CTLSEQLDFIDTKRG	6	LDFIDTKRG
EHEIAWYTERSEKSY	5	WYTERSEKS	EQLDFIDTKRGVYCC	2	LDFIDTKRG	TLSEQLDFIDTKRGV	5	LDFIDTKRG
HEIAWYTERSEKSYE	4	WYTERSEKS	QLDFIDTKRGVYCCR	1	LDFIDTKRG	LSEQLDFIDTKRGVY	4	LDFIDTKRG
EIAWYTERSEKSYEL	3	WYTERSEKS	LDFIDTKRGVYCCRE	0	LDFIDTKRG	SEQLDFIDTKRGVYC	3	LDFIDTKRG
AWYTERSEKSYELQT	1	WYTERSEKS	DFIDTKRGVYCCREH	2	IDTKRGVYC	EQLDFIDTKRGVYCC	2	LDFIDTKRG
WYTERSEKSYELQTP	0	WYTERSEKS	FEIKLAKKFDTFNGE	4	LAKKFDTFN	QLDFIDTKRGVYCCR	1	LDFIDTKRG
KFDTFNGECPNFVFP	4	FNGECPNFV	EIKLAKKFDTFNGEC	3	LAKKFDTFN	LDFIDTKRGVYCCRE	0	LDFIDTKRG
FDTFNGECPNFVFPL	3	FNGECPNFV	FNGECPNFVFPLNSI	8	VFPLNSIGG	TFNGECPNFVFPLNS	9	VFPLNSGGS
DTFNGECPNFVFPLN	2	FNGECPNFV	NGECPNFVFPLNSII	7	VFPLNSIIG	FNGECPNFVFPLNSI	8	VFPLNSIGG
TFNGECPNFVFPLNS	1	FNGECPNFV	QPRVEKKKLDGFMGR	8	LDGFMGRGG	NGECPNFVFPLNSII	7	VFPLNSIIG
DGFMGRIRSVYPVAS	9	VYPVASGGS	DGFMGRIRSVYPVAS	9	VYPVASGGS	GECPNFVFPLNSIIK	6	VFPLNSIIK
GFMGRIRSVYPVASP	8	VYPVASPGG	GFMGRIRSVYPVASP	8	VYPVASPGG	ECPNFVFPLNSIIKT	5	VFPLNSIIK
FMGRIRSVYPVASPN	4	IRSVYPVAS	FMGRIRSVYPVASPN	7	VYPVASPNG	VFPLNSIIKTIQPRV	0	VFPLNSIIK
MGRIRSVYPVASPNE	3	IRSVYPVAS	MGRIRSVYPVASPNE	6	VYPVASPNE	KKLDGFMGRIRSVYP	9	IRSVYPGGS
GRIRSVYPVASPNEC	2	IRSVYPVAS	GRIRSVYPVASPNEC	5	VYPVASPNE	LDGFMGRIRSVYPVA	10	VYPVAGGSG
RIRSVYPVASPNECN	1	IRSVYPVAS	RIRSVYPVASPNECN	4	VYPVASPNE	DGFMGRIRSVYPVAS	9	VYPVASGGS
NECNQMCLSTLMKCD	1	ECNQMCLST	QNAVVKIYCPACHNS	3	VVKIYCPAC	GFMGRIRSVYPVASP	8	VYPVASPGG
STLMKCDHCGETSWQ	10	ETSWQGGSG	GPEHSLAEYHNESGL	5	LAEYHNESG	MGRIRSVYPVASPNE	6	VYPVASPNE
ETSWQTGDFVKATCE	8	FVKATCEGG	EHSLAEYHNESGLKT	9	ESGLKTGGS	GRIRSVYPVASPNEC	5	VYPVASPNE
TSWQTGDFVKATCEF	7	FVKATCEFG	HSLAEYHNESGLKTI	8	ESGLKTIGG	RIRSVYPVASPNECN	4	VYPVASPNE
SWQTGDFVKATCEFC	6	FVKATCEFC	HNESGLKTILRKGGR	8	ILRKGGRGG	SVYPVASPNECNQMC	1	VYPVASPNE
WQTGDFVKATCEFCG	5	FVKATCEFC	NESGLKTILRKGGRT	1	ESGLKTILR	ETSWQTGDFVKATCE	9	VKATCEGGS
QTGDFVKATCEFCGT	4	FVKATCEFC	ESGLKTILRKGGRTI	0	ESGLKTILR	CGYLPQNAVVKIYCP	9	VKIYCPGGS
TGDFVKATCEFCGTE	3	FVKATCEFC	SGLKTILRKGGRTIA	5	ILRKGGRTI	GYLPQNAVVKIYCPA	7	VVKIYCPAG
GDFVKATCEFCGTEN	2	FVKATCEFC	KTILRKGGRTIAFGG	2	ILRKGGRTI	LPQNAVVKIYCPACH	5	VVKIYCPAC
DFVKATCEFCGTENL	1	FVKATCEFC	TILRKGGRTIAFGGC	1	ILRKGGRTI	NAVVKIYCPACHNSE	2	VVKIYCPAC
KEGATTCGYLPQNAV	8	YLPQNAVGG	GCHNKCAYWVPRASA	9	VPRASAGGS	AVVKIYCPACHNSEV	1	VVKIYCPAC
EGATTCGYLPQNAVV	7	YLPQNAVVG	CHNKCAYWVPRASAN	8	VPRASANGG	CPACHNSEVGPEHSL	8	VGPEHSLGG
VGPEHSLAEYHNESG	0	VGPEHSLAE	HNKCAYWVPRASANI	7	VPRASANIG	EHSLAEYHNESGLKT	9	ESGLKTGGS
GPEHSLAEYHNESGL	8	YHNESGLGG	KCAYWVPRASANIGC	5	VPRASANIG	NDNLLEILQKEKVNI	7	LQKEKVNIG
PEHSLAEYHNESGLK	7	YHNESGLKG	NDNLLEILQKEKVNI	5	EILQKEKVN	EILQKEKVNINIVGD	2	LQKEKVNIN
EHSLAEYHNESGLKT	6	YHNESGLKT	NEEIAIILASFSAST	5	IILASFSAS	ILQKEKVNINIVGDF	10	IVGDFGGSG
HSLAEYHNESGLKTI	5	YHNESGLKT	DYKAFKQIVESCGNF	8	VESCGNFGG	LQKEKVNINIVGDFK	0	LQKEKVNIN
SLAEYHNESGLKTIL	4	YHNESGLKT	KAFKQIVESCGNFKV	6	VESCGNFKV	VGDFKLNEEIAIILA	5	LNEEIAIIL
LAEYHNESGLKTILR	3	YHNESGLKT	QIVESCGNFKVTKGK	5	CGNFKVTKG	GDFKLNEEIAIILAS	10	IILASGGSG
AEYHNESGLKTILRK	2	YHNESGLKT	AKKGAWNIGEQKSIL	7	IGEQKSILG	DFKLNEEIAIILASF	10	ILASFGGSG
EYHNESGLKTILRKG	1	YHNESGLKT	KKGAWNIGEQKSILS	6	IGEQKSILS	FKLNEEIAIILASFS	9	ILASFSGGS
GCVFSYVGCHNKCAY	10	NKCAYGGSG	KGAWNIGEQKSILSP	5	IGEQKSILS	KLNEEIAIILASFSA	8	ILASFSAGG
FSYVGCHNKCAYWVP	2	YVGCHNKCA	GAWNIGEQKSILSPL	4	IGEQKSILS	LNEEIAIILASFSAS	7	ILASFSASG
SYVGCHNKCAYWVPR	1	YVGCHNKCA	AWNIGEQKSILSPLY	3	IGEQKSILS	NEEIAIILASFSAST	6	ILASFSAST
YVGCHNKCAYWVPRA	0	YVGCHNKCA	WNIGEQKSILSPLYA	2	IGEQKSILS	EEIAIILASFSASTS	6	LASFSASTS
NIGCNHTGVVGEGSE	8	VVGEGSEGG	NIGEQKSILSPLYAF	1	IGEQKSILS	LDYKAFKQIVESCGN	9	VESCGNGGS
LNDNLLEILQKEKVN	0	LNDNLLEIL	EQKSILSPLYAFASE	5	LSPLYAFAS	DYKAFKQIVESCGNF	8	VESCGNFGG
NDNLLEILQKEKVNI	7	LQKEKVNIG	QKSILSPLYAFASEA	7	LYAFASEAG	KAFKQIVESCGNFKV	6	VESCGNFKV
LNEEIAIILASFSAS	8	LASFSASGG	KSILSPLYAFASEAA	6	LYAFASEAA	QIVESCGNFKVTKGK	2	VESCGNFKV
NEEIAIILASFSAST	7	LASFSASTG	RSIFSRTLETAQNSV	7	LETAQNSVG	KGAWNIGEQKSILSP	5	IGEQKSILS
EEIAIILASFSASTS	6	LASFSASTS	ETAQNSVRVLQKAAI	8	VLQKAAIGG	GAWNIGEQKSILSPL	4	IGEQKSILS
GLDYKAFKQIVESCG	6	FKQIVESCG	TAQNSVRVLQKAAIT	7	VLQKAAITG	WNIGEQKSILSPLYA	2	IGEQKSILS
LDYKAFKQIVESCGN	5	FKQIVESCG	QKAAITILDGISQYS	6	ILDGISQYS	NIGEQKSILSPLYAF	1	IGEQKSILS
DYKAFKQIVESCGNF	7	IVESCGNFG	KAAITILDGISQYSL	5	ILDGISQYS	GEQKSILSPLYAFAS	6	LSPLYAFAS
KGAWNIGEQKSILSP	5	IGEQKSILS	AAITILDGISQYSLR	4	ILDGISQYS	EQKSILSPLYAFASE	5	LSPLYAFAS
NIGEQKSILSPLYAF	1	IGEQKSILS	AITILDGISQYSLRL	3	ILDGISQYS	QKSILSPLYAFASEA	7	LYAFASEAG
EQKSILSPLYAFASE	8	LYAFASEGG	ITILDGISQYSLRLI	2	ILDGISQYS	KSILSPLYAFASEAA	6	LYAFASEAA
QKSILSPLYAFASEA	7	LYAFASEAG	TILDGISQYSLRLID	1	ILDGISQYS	SPLYAFASEAARVVR	2	LYAFASEAA
KSILSPLYAFASEAA	6	LYAFASEAA	CEIVGGQIVTCAKEI	3	VGGQIVTCA	RSIFSRTLETAQNSV	7	LETAQNSVG
SILSPLYAFASEAAR	5	LYAFASEAA	EIVGGQIVTCAKEIK	2	VGGQIVTCA	SIFSRTLETAQNSVR	7	ETAQNSVRG
ILSPLYAFASEAARV	4	LYAFASEAA	LALCADSIIIGGAKL	7	IIIGGAKLG	TAQNSVRVLQKAAIT	7	VLQKAAITG
SPLYAFASEAARVVR	2	LYAFASEAA	IGGAKLKALNLGETF	8	LNLGETFGG	AQNSVRVLQKAAITI	6	VLQKAAITI
RSIFSRTLETAQNSV	7	LETAQNSVG	GGAKLKALNLGETFV	7	LNLGETFVG	RVLQKAAITILDGIS	9	ILDGISGGS
QKAAITILDGISQYS	6	ILDGISQYS	GAKLKALNLGETFVT	6	LNLGETFVT	VLQKAAITILDGISQ	8	ILDGISQGG
KAAITILDGISQYSL	5	ILDGISQYS	AKLKALNLGETFVTH	5	LNLGETFVT	QKAAITILDGISQYS	6	ILDGISQYS
TILDGISQYSLRLID	1	ILDGISQYS	LTEEVVLKTGDLQPL	0	LTEEVVLKT	KAAITILDGISQYSL	5	ILDGISQYS
LDGISQYSLRLIDAM	2	GISQYSLRL	TEEVVLKTGDLQPLE	3	VVLKTGDLQ	AAITILDGISQYSLR	4	ILDGISQYS
DGISQYSLRLIDAMM	1	GISQYSLRL	EEVVLKTGDLQPLEQ	2	VVLKTGDLQ	TILDGISQYSLRLID	1	ILDGISQYS
RLIDAMMFTSDLATN	7	FTSDLATNG	EVVLKTGDLQPLEQP	1	VVLKTGDLQ	LDGISQYSLRLIDAM	10	LIDAMGGSG
LIDAMMFTSDLATNN	6	FTSDLATNN	VCINGLMLLEIKDTE	7	LLEIKDTEG	DGISQYSLRLIDAMM	2	ISQYSLRLI
IDAMMFTSDLATNNL	5	FTSDLATNN	GLMLLEIKDTEKYCA	3	LLEIKDTEK	SDLATNNLVVMAYIT	0	SDLATNNLV
DAMMFTSDLATNNLV	4	FTSDLATNN	MLLEIKDTEKYCALA	1	LLEIKDTEK	ATNNLVVMAYITGGV	6	VMAYITGGV
AMMFTSDLATNNLVV	3	FTSDLATNN	LLEIKDTEKYCALAP	0	LLEIKDTEK	EFLRDGWEIVKFIST	8	IVKFISTGG
MMFTSDLATNNLVVM	2	FTSDLATNN	EIKDTEKYCALAPNM	8	CALAPNMGG	DGWEIVKFISTCACE	4	IVKFISTCA
TNIFGTVYEKLKPVL	7	YEKLKPVLG	IKDTEKYCALAPNMM	7	CALAPNMMG	CEIVGGQIVTCAKEI	3	VGGQIVTCA
EGVEFLRDGWEIVKF	4	FLRDGWEIV	TEKYCALAPNMMVTN	4	CALAPNMMV	EIVGGQIVTCAKEIK	2	VGGQIVTCA
EFLRDGWEIVKFIST	8	IVKFISTGG	YCALAPNMMVTNNTF	1	CALAPNMMV	GGAKLKALNLGETFV	6	ALNLGETFV
RDGWEIVKFISTCAC	5	IVKFISTCA	FGDDTVIEVQGYKSV	8	VQGYKSVGG	EIIFLEGETLPTEVL	8	TLPTEVLGG
KEIKESVQTFFKLVN	9	FFKLVNGGS	GDDTVIEVQGYKSVN	7	VQGYKSVNG	LEGETLPTEVLTEEV	9	VLTEEVGGS
KFLALCADSIIIGGA	3	ALCADSIII	DDTVIEVQGYKSVNI	3	VIEVQGYKS	GETLPTEVLTEEVVL	7	VLTEEVVLG
LKAPKEIIFLEGETL	7	IFLEGETLG	DERIDKVLNEKCSAY	7	LNEKCSAYG	SEAVEAPLVGTPVCI	7	LVGTPVCIG
KAPKEIIFLEGETLP	8	LEGETLPGG	ERIDKVLNEKCSAYT	6	LNEKCSAYT	TPVCINGLMLLEIKD	4	INGLMLLEI
KEIIFLEGETLPTEV	3	IFLEGETLP	RIDKVLNEKCSAYTV	5	LNEKCSAYT	EIKDTEKYCALAPNM	10	LAPNMGGSG
EGETLPTEVLTEEVV	8	VLTEEVVGG	DKVLNEKCSAYTVEL	3	LNEKCSAYT	IKDTEKYCALAPNMM	0	IKDTEKYCA
GETLPTEVLTEEVVL	7	VLTEEVVLG	VLNEKCSAYTVELGT	1	LNEKCSAYT	KDTEKYCALAPNMMV	6	CALAPNMMV
ETLPTEVLTEEVVLK	7	LTEEVVLKG	YTVELGTEVNEFACV	1	TVELGTEVN	DTEKYCALAPNMMVT	5	CALAPNMMV
TSEAVEAPLVGTPVC	2	EAVEAPLVG	TVELGTEVNEFACVV	0	TVELGTEVN	EKYCALAPNMMVTNN	3	CALAPNMMV
LLEIKDTEKYCALAP	2	EIKDTEKYC	VELGTEVNEFACVVA	6	VNEFACVVA	KYCALAPNMMVTNNT	10	VTNNTGGSG
LEIKDTEKYCALAPN	1	EIKDTEKYC	ELGTEVNEFACVVAD	5	VNEFACVVA	APNMMVTNNTFTLKG	6	TNNTFTLKG
EIKDTEKYCALAPNM	0	EIKDTEKYC	LGTEVNEFACVVADA	4	VNEFACVVA	TFGDDTVIEVQGYKS	9	VQGYKSGGS
IKDTEKYCALAPNMM	3	TEKYCALAP	GTEVNEFACVVADAV	3	VNEFACVVA	FGDDTVIEVQGYKSV	8	VQGYKSVGG
KDTEKYCALAPNMMV	2	TEKYCALAP	TEVNEFACVVADAVI	2	VNEFACVVA	GDDTVIEVQGYKSVN	7	VQGYKSVNG
DTEKYCALAPNMMVT	1	TEKYCALAP	EVNEFACVVADAVIK	1	VNEFACVVA	DDTVIEVQGYKSVNI	6	VQGYKSVNI
TEKYCALAPNMMVTN	0	TEKYCALAP	VNEFACVVADAVIKT	6	VVADAVIKT	DTVIEVQGYKSVNIT	5	VQGYKSVNI
EKYCALAPNMMVTNN	1	KYCALAPNM	TLQPVSELLTPLGID	4	VSELLTPLG	DERIDKVLNEKCSAY	3	IDKVLNEKC
KYCALAPNMMVTNNT	10	VTNNTGGSG	LQPVSELLTPLGIDL	3	VSELLTPLG	RIDKVLNEKCSAYTV	1	IDKVLNEKC
YCALAPNMMVTNNTF	10	TNNTFGGSG	QPVSELLTPLGIDLD	2	VSELLTPLG	AYTVELGTEVNEFAC	5	LGTEVNEFA
KGGAPTKVTFGDDTV	9	FGDDTVGGS	EFKLASHMYCSFYPP	0	EFKLASHMY	YTVELGTEVNEFACV	4	LGTEVNEFA
GGAPTKVTFGDDTVI	8	FGDDTVIGG	QTTTIQTIVEVQPQL	7	IVEVQPQLG	TVELGTEVNEFACVV	3	LGTEVNEFA
TFGDDTVIEVQGYKS	1	FGDDTVIEV	EVNSFSGYLKLTDNV	8	LKLTDNVGG	VELGTEVNEFACVVA	2	LGTEVNEFA
GYKSVNITFELDERI	0	GYKSVNITF	NVYIKNADIVEEAKK	1	VYIKNADIV	ELGTEVNEFACVVAD	1	LGTEVNEFA
ELDERIDKVLNEKCS	5	IDKVLNEKC	EAKKVKPTVVVNAAN	9	VVNAANGGS	LGTEVNEFACVVADA	0	LGTEVNEFA
DERIDKVLNEKCSAY	3	IDKVLNEKC	AKKVKPTVVVNAANV	8	VVNAANVGG	GTEVNEFACVVADAV	9	VVADAVGGS
ERIDKVLNEKCSAYT	2	IDKVLNEKC	KKVKPTVVVNAANVY	7	VVNAANVYG	TEVNEFACVVADAVI	8	VVADAVIGG
RIDKVLNEKCSAYTV	1	IDKVLNEKC	KVKPTVVVNAANVYL	6	VVNAANVYL	EVNEFACVVADAVIK	7	VVADAVIKG
KVLNEKCSAYTVELG	9	YTVELGGGS	VKPTVVVNAANVYLK	5	VVNAANVYL	VNEFACVVADAVIKT	6	VVADAVIKT
VLNEKCSAYTVELGT	8	YTVELGTGG	KPTVVVNAANVYLKH	4	VVNAANVYL	EFACVVADAVIKTLQ	4	VVADAVIKT
LNEKCSAYTVELGTE	7	YTVELGTEG	KHGGGVAGALNKATN	5	VAGALNKAT	AVIKTLQPVSELLTP	8	VSELLTPGG
NEKCSAYTVELGTEV	10	LGTEVGGSG	HGGGVAGALNKATNN	4	VAGALNKAT	IKTLQPVSELLTPLG	6	VSELLTPLG
EKCSAYTVELGTEVN	9	LGTEVNGGS	GGGVAGALNKATNNA	3	VAGALNKAT	KTLQPVSELLTPLGI	5	VSELLTPLG
AYTVELGTEVNEFAC	5	LGTEVNEFA	GGVAGALNKATNNAM	2	VAGALNKAT	TLQPVSELLTPLGID	4	VSELLTPLG
YTVELGTEVNEFACV	4	LGTEVNEFA	GVAGALNKATNNAMQ	1	VAGALNKAT	LQPVSELLTPLGIDL	3	VSELLTPLG
TVELGTEVNEFACVV	3	LGTEVNEFA	AGALNKATNNAMQVE	2	ALNKATNNA	QPVSELLTPLGIDLD	2	VSELLTPLG
VELGTEVNEFACVVA	2	LGTEVNEFA	GALNKATNNAMQVES	1	ALNKATNNA	VSELLTPLGIDLDEW	0	VSELLTPLG
ELGTEVNEFACVVAD	1	LGTEVNEFA	ALNKATNNAMQVESD	0	ALNKATNNA	LTPLGIDLDEWSMAT	0	LTPLGIDLD
LGTEVNEFACVVADA	0	LGTEVNEFA	LNKATNNAMQVESDD	0	LNKATNNAM	SEDNQTTTIQTIVEV	7	TIQTIVEVG
GTEVNEFACVVADAV	9	VVADAVGGS	LKVGGSCVLSGHNLA	7	VLSGHNLAG	EDNQTTTIQTIVEVQ	6	TIQTIVEVQ
TEVNEFACVVADAVI	8	VVADAVIGG	PNVNKGEDIQLLKSA	8	IQLLKSAGG	DNQTTTIQTIVEVQP	5	TIQTIVEVQ
EVNEFACVVADAVIK	7	VVADAVIKG	NVNKGEDIQLLKSAY	7	IQLLKSAYG	NQTTTIQTIVEVQPQ	4	TIQTIVEVQ
VNEFACVVADAVIKT	6	VVADAVIKT	GEDIQLLKSAYENFN	3	IQLLKSAYE	QTTTIQTIVEVQPQL	3	TIQTIVEVQ
NEFACVVADAVIKTL	5	VVADAVIKT	AYENFNQHEVLLAPL	4	FNQHEVLLA	TTIQTIVEVQPQLEM	1	TIQTIVEVQ
EFACVVADAVIKTLQ	4	VVADAVIKT	YENFNQHEVLLAPLL	3	FNQHEVLLA	TIQTIVEVQPQLEME	0	TIQTIVEVQ
LQPVSELLTPLGIDL	3	VSELLTPLG	ENFNQHEVLLAPLLS	2	FNQHEVLLA	IQTIVEVQPQLEMEL	10	LEMELGGSG
VSELLTPLGIDLDEW	0	VSELLTPLG	NFNQHEVLLAPLLSA	1	FNQHEVLLA	QTIVEVQPQLEMELT	9	LEMELTGGS
SELLTPLGIDLDEWS	6	LGIDLDEWS	FNQHEVLLAPLLSAG	0	FNQHEVLLA	TIVEVQPQLEMELTP	8	LEMELTPGG
ELLTPLGIDLDEWSM	5	LGIDLDEWS	NQHEVLLAPLLSAGI	3	EVLLAPLLS	IVEVQPQLEMELTPV	7	LEMELTPVG
LLTPLGIDLDEWSMA	4	LGIDLDEWS	QHEVLLAPLLSAGIF	2	EVLLAPLLS	VEVQPQLEMELTPVV	6	LEMELTPVV
LTPLGIDLDEWSMAT	3	LGIDLDEWS	LAPLLSAGIFGADPI	0	LAPLLSAGI	EVQPQLEMELTPVVQ	5	LEMELTPVV
TPLGIDLDEWSMATY	2	LGIDLDEWS	GIFGADPIHSLRVCV	9	SLRVCVGGS	VQPQLEMELTPVVQT	4	LEMELTPVV
LDEWSMATYYLFDES	10	LFDESGGSG	GADPIHSLRVCVDTV	1	ADPIHSLRV	QPQLEMELTPVVQTI	3	LEMELTPVV
YYLFDESGEFKLASH	2	LFDESGEFK	DKLVSSFLEMKSEKQ	0	DKLVSSFLE	PQLEMELTPVVQTIE	2	LEMELTPVV
FDESGEFKLASHMYC	0	FDESGEFKL	VSSFLEMKSEKQVEQ	0	VSSFLEMKS	QLEMELTPVVQTIEV	1	LEMELTPVV
ESGEFKLASHMYCSF	4	FKLASHMYC	SSFLEMKSEKQVEQK	2	FLEMKSEKQ	LEMELTPVVQTIEVN	0	LEMELTPVV
GEFKLASHMYCSFYP	9	YCSFYPGGS	SFLEMKSEKQVEQKI	10	VEQKIGGSG	EMELTPVVQTIEVNS	6	VVQTIEVNS
EFKLASHMYCSFYPP	8	YCSFYPPGG	FLEMKSEKQVEQKIA	9	VEQKIAGGS	EVNSFSGYLKLTDNV	8	LKLTDNVGG
STQYEYGTEDDYQGK	5	YGTEDDYQG	IAEIPKEEVKPFITE	8	VKPFITEGG	VNSFSGYLKLTDNVY	7	LKLTDNVYG
TQYEYGTEDDYQGKP	4	YGTEDDYQG	EIPKEEVKPFITESK	6	VKPFITESK	NSFSGYLKLTDNVYI	6	LKLTDNVYI
QYEYGTEDDYQGKPL	3	YGTEDDYQG	IPKEEVKPFITESKP	5	VKPFITESK	SGYLKLTDNVYIKNA	3	LKLTDNVYI
YEYGTEDDYQGKPLE	2	YGTEDDYQG	KEEVKPFITESKPSV	3	VKPFITESK	GYLKLTDNVYIKNAD	2	LKLTDNVYI
GKPLEFGATSAALQP	4	EFGATSAAL	EEVKPFITESKPSVE	2	VKPFITESK	NVYIKNADIVEEAKK	4	KNADIVEEA
KPLEFGATSAALQPE	3	EFGATSAAL	EVKPFITESKPSVEQ	1	VKPFITESK	VYIKNADIVEEAKKV	3	KNADIVEEA
LEFGATSAALQPEEE	1	EFGATSAAL	KDAPYIVGDVVQEGV	9	VVQEGVGGS	AKKVKPTVVVNAANV	3	VKPTVVVNA
EFGATSAALQPEEEQ	0	EFGATSAAL	DAPYIVGDVVQEGVL	8	VVQEGVLGG	KKVKPTVVVNAANVY	2	VKPTVVVNA
EDWLDDDSQQTVGQQ	2	WLDDDSQQT	APYIVGDVVQEGVLT	7	VVQEGVLTG	KVKPTVVVNAANVYL	1	VKPTVVVNA
DWLDDDSQQTVGQQD	1	WLDDDSQQT	YIVGDVVQEGVLTAV	5	VVQEGVLTA	VKPTVVVNAANVYLK	0	VKPTVVVNA
WLDDDSQQTVGQQDG	0	WLDDDSQQT	IVGDVVQEGVLTAVV	4	VVQEGVLTA	KPTVVVNAANVYLKH	4	VVNAANVYL
NQTTTIQTIVEVQPQ	4	TIQTIVEVQ	GDVVQEGVLTAVVIP	2	VVQEGVLTA	KHGGGVAGALNKATN	5	VAGALNKAT
QTIVEVQPQLEMELT	9	LEMELTGGS	DVVQEGVLTAVVIPT	1	VVQEGVLTA	HGGGVAGALNKATNN	4	VAGALNKAT
TIVEVQPQLEMELTP	8	LEMELTPGG	GTTEMLAKALRKVPT	3	EMLAKALRK	GGGVAGALNKATNNA	3	VAGALNKAT
IVEVQPQLEMELTPV	7	LEMELTPVG	RKVPTDNYITTYPGQ	2	VPTDNYITT	GGVAGALNKATNNAM	2	VAGALNKAT
VEVQPQLEMELTPVV	6	LEMELTPVV	GQGLNGYTVEEAKTV	3	LNGYTVEEA	GVAGALNKATNNAMQ	1	VAGALNKAT
EVQPQLEMELTPVVQ	5	LEMELTPVV	KKCKSAFYILPSIIS	6	FYILPSIIS	VAGALNKATNNAMQV	0	VAGALNKAT
VQPQLEMELTPVVQT	4	LEMELTPVV	CKSAFYILPSIISNE	4	FYILPSIIS	AGALNKATNNAMQVE	3	LNKATNNAM
QPQLEMELTPVVQTI	3	LEMELTPVV	KSAFYILPSIISNEK	3	FYILPSIIS	GALNKATNNAMQVES	2	LNKATNNAM
PQLEMELTPVVQTIE	2	LEMELTPVV	SIISNEKQEILGTVS	8	EILGTVSGG	ALNKATNNAMQVESD	1	LNKATNNAM
QLEMELTPVVQTIEV	1	LEMELTPVV	IISNEKQEILGTVSW	2	SNEKQEILG	LKVGGSCVLSGHNLA	2	VGGSCVLSG
LEMELTPVVQTIEVN	0	LEMELTPVV	ISNEKQEILGTVSWN	8	LGTVSWNGG	KHCLHVVGPNVNKGE	5	VVGPNVNKG
IEVNSFSGYLKLTDN	9	LKLTDNGGS	SNEKQEILGTVSWNL	7	LGTVSWNLG	PNVNKGEDIQLLKSA	8	IQLLKSAGG
EVNSFSGYLKLTDNV	8	LKLTDNVGG	NEKQEILGTVSWNLR	6	LGTVSWNLR	NVNKGEDIQLLKSAY	7	IQLLKSAYG
VNSFSGYLKLTDNVY	7	LKLTDNVYG	EKQEILGTVSWNLRE	5	LGTVSWNLR	VNKGEDIQLLKSAYE	6	IQLLKSAYE
NSFSGYLKLTDNVYI	6	LKLTDNVYI	KQEILGTVSWNLREM	4	LGTVSWNLR	NKGEDIQLLKSAYEN	5	IQLLKSAYE
SGYLKLTDNVYIKNA	3	LKLTDNVYI	QEILGTVSWNLREML	3	LGTVSWNLR	KGEDIQLLKSAYENF	4	IQLLKSAYE
GYLKLTDNVYIKNAD	2	LKLTDNVYI	EILGTVSWNLREMLA	2	LGTVSWNLR	GEDIQLLKSAYENFN	3	IQLLKSAYE
LKLTDNVYIKNADIV	0	LKLTDNVYI	AHAEETRKLMPVCVE	4	ETRKLMPVC	EDIQLLKSAYENFNQ	2	IQLLKSAYE
KLTDNVYIKNADIVE	7	IKNADIVEG	KTTVASLINTLNDLN	3	VASLINTLN	DIQLLKSAYENFNQH	1	IQLLKSAYE
DNVYIKNADIVEEAK	5	KNADIVEEA	HGLNLEEAARYMRSL	2	LNLEEAARY	SAYENFNQHEVLLAP	10	VLLAPGGSG
VKPTVVVNAANVYLK	5	VVNAANVYL	GLNLEEAARYMRSLK	1	LNLEEAARY	AYENFNQHEVLLAPL	9	VLLAPLGGS
HGGGVAGALNKATNN	4	VAGALNKAT	NLEEAARYMRSLKVP	10	SLKVPGGSG	YENFNQHEVLLAPLL	8	VLLAPLLGG
GGGVAGALNKATNNA	3	VAGALNKAT	EEAARYMRSLKVPAT	8	SLKVPATGG	NFNQHEVLLAPLLSA	6	VLLAPLLSA
GVAGALNKATNNAMQ	1	VAGALNKAT	RYMRSLKVPATVSVS	4	SLKVPATVS	FNQHEVLLAPLLSAG	5	VLLAPLLSA
AGALNKATNNAMQVE	3	LNKATNNAM	YMRSLKVPATVSVSS	9	TVSVSSGGS	NQHEVLLAPLLSAGI	4	VLLAPLLSA
GALNKATNNAMQVES	2	LNKATNNAM	TPEEHFIETISLAGS	9	ISLAGSGGS	QHEVLLAPLLSAGIF	3	VLLAPLLSA
ALNKATNNAMQVESD	1	LNKATNNAM	PEEHFIETISLAGSY	8	ISLAGSYGG	APLLSAGIFGADPIH	2	LLSAGIFGA
LNKATNNAMQVESDD	0	LNKATNNAM	EEHFIETISLAGSYK	7	ISLAGSYKG	GIFGADPIHSLRVCV	9	SLRVCVGGS
AMQVESDDYIATNGP	3	VESDDYIAT	FIETISLAGSYKDWS	0	FIETISLAG	FGADPIHSLRVCVDT	2	ADPIHSLRV
MQVESDDYIATNGPL	2	VESDDYIAT	IETISLAGSYKDWSY	2	TISLAGSYK	GADPIHSLRVCVDTV	9	VCVDTVGGS
SAYENFNQHEVLLAP	5	FNQHEVLLA	ETISLAGSYKDWSYS	1	TISLAGSYK	DKLVSSFLEMKSEKQ	3	VSSFLEMKS
AYENFNQHEVLLAPL	4	FNQHEVLLA	FLKRGDKSVYYTSNP	1	LKRGDKSVY	SSFLEMKSEKQVEQK	2	FLEMKSEKQ
YENFNQHEVLLAPLL	3	FNQHEVLLA	TTFHLDGEVITFDNL	8	VITFDNLGG	SFLEMKSEKQVEQKI	1	FLEMKSEKQ
ENFNQHEVLLAPLLS	6	EVLLAPLLS	FHLDGEVITFDNLKT	6	VITFDNLKT	AEIPKEEVKPFITES	7	VKPFITESG
NFNQHEVLLAPLLSA	8	LAPLLSAGG	HLDGEVITFDNLKTL	5	VITFDNLKT	EIPKEEVKPFITESK	6	VKPFITESK
APLLSAGIFGADPIH	2	LLSAGIFGA	LDGEVITFDNLKTLL	4	VITFDNLKT	IPKEEVKPFITESKP	5	VKPFITESK
PLLSAGIFGADPIHS	1	LLSAGIFGA	DGEVITFDNLKTLLS	3	VITFDNLKT	KEEVKPFITESKPSV	3	VKPFITESK
SAGIFGADPIHSLRV	3	IFGADPIHS	GEVITFDNLKTLLSL	2	VITFDNLKT	EEVKPFITESKPSVE	2	VKPFITESK
GIFGADPIHSLRVCV	1	IFGADPIHS	EVITFDNLKTLLSLR	1	VITFDNLKT	EVKPFITESKPSVEQ	1	VKPFITESK
IFGADPIHSLRVCVD	0	IFGADPIHS	VITFDNLKTLLSLRE	0	VITFDNLKT	QDDKKIKACVEEVTT	5	IKACVEEVT
FGADPIHSLRVCVDT	10	VCVDTGGSG	ITFDNLKTLLSLREV	2	FDNLKTLLS	DKKIKACVEEVTTTL	10	VTTTLGGSG
GADPIHSLRVCVDTV	9	VCVDTVGGS	DNLKTLLSLREVRTI	2	LKTLLSLRE	KFLTENLLLYIDING	6	LLLYIDING
ADPIHSLRVCVDTVR	8	VCVDTVRGG	KTLLSLREVRTIKVF	2	LLSLREVRT	FLTENLLLYIDINGN	5	LLLYIDING
DKLVSSFLEMKSEKQ	3	VSSFLEMKS	SLREVRTIKVFTTVD	4	VRTIKVFTT	LTENLLLYIDINGNL	4	LLLYIDING
KLVSSFLEMKSEKQV	2	VSSFLEMKS	REVRTIKVFTTVDNI	8	FTTVDNIGG	TENLLLYIDINGNLH	3	LLLYIDING
SSFLEMKSEKQVEQK	2	FLEMKSEKQ	EVRTIKVFTTVDNIN	7	FTTVDNING	ENLLLYIDINGNLHP	2	LLLYIDING
SFLEMKSEKQVEQKI	1	FLEMKSEKQ	RTIKVFTTVDNINLH	5	FTTVDNINL	NLLLYIDINGNLHPD	1	LLLYIDING
FLEMKSEKQVEQKIA	0	FLEMKSEKQ	NINLHTQVVDMSMTY	7	VVDMSMTYG	GNLHPDSATLVSDID	2	LHPDSATLV
IAEIPKEEVKPFITE	8	VKPFITEGG	NLHTQVVDMSMTYGQ	5	VVDMSMTYG	NLHPDSATLVSDIDI	1	LHPDSATLV
AEIPKEEVKPFITES	10	FITESGGSG	LHTQVVDMSMTYGQQ	4	VVDMSMTYG	LHPDSATLVSDIDIT	0	LHPDSATLV
TTTLEETKFLTENLL	8	FLTENLLGG	HTQVVDMSMTYGQQF	3	VVDMSMTYG	FLKKDAPYIVGDVVQ	8	IVGDVVQGG
TTLEETKFLTENLLL	7	FLTENLLLG	TQVVDMSMTYGQQFG	2	VVDMSMTYG	LKKDAPYIVGDVVQE	7	IVGDVVQEG
KFLTENLLLYIDING	1	FLTENLLLY	QVVDMSMTYGQQFGP	1	VVDMSMTYG	KKDAPYIVGDVVQEG	6	IVGDVVQEG
FLTENLLLYIDINGN	0	FLTENLLLY	YLDGADVTKIKPHNS	1	LDGADVTKI	KDAPYIVGDVVQEGV	5	IVGDVVQEG
LTENLLLYIDINGNL	6	LYIDINGNL	LDGADVTKIKPHNSH	0	LDGADVTKI	DAPYIVGDVVQEGVL	8	VVQEGVLGG
TENLLLYIDINGNLH	5	LYIDINGNL	DGADVTKIKPHNSHE	7	IKPHNSHEG	APYIVGDVVQEGVLT	7	VVQEGVLTG
ENLLLYIDINGNLHP	4	LYIDINGNL	GADVTKIKPHNSHEG	6	IKPHNSHEG	PYIVGDVVQEGVLTA	6	VVQEGVLTA
NLLLYIDINGNLHPD	3	LYIDINGNL	ADVTKIKPHNSHEGK	5	IKPHNSHEG	YIVGDVVQEGVLTAV	5	VVQEGVLTA
NGNLHPDSATLVSDI	10	LVSDIGGSG	DVTKIKPHNSHEGKT	4	IKPHNSHEG	IVGDVVQEGVLTAVV	4	VVQEGVLTA
GNLHPDSATLVSDID	9	LVSDIDGGS	VTKIKPHNSHEGKTF	3	IKPHNSHEG	VGDVVQEGVLTAVVI	3	VVQEGVLTA
NLHPDSATLVSDIDI	8	LVSDIDIGG	TKIKPHNSHEGKTFY	2	IKPHNSHEG	GDVVQEGVLTAVVIP	2	VVQEGVLTA
LHPDSATLVSDIDIT	7	LVSDIDITG	KIKPHNSHEGKTFYV	1	IKPHNSHEG	DVVQEGVLTAVVIPT	1	VVQEGVLTA
HPDSATLVSDIDITF	6	LVSDIDITF	IKPHNSHEGKTFYVL	0	IKPHNSHEG	VVQEGVLTAVVIPTK	0	VVQEGVLTA
PDSATLVSDIDITFL	5	LVSDIDITF	TDPSFLGRYMSALNH	5	LGRYMSALN	RKVPTDNYITTYPGQ	1	KVPTDNYIT
DSATLVSDIDITFLK	4	LVSDIDITF	PQVNGLTSIKWADNN	2	VNGLTSIKW	KVPTDNYITTYPGQG	0	KVPTDNYIT
SATLVSDIDITFLKK	3	LVSDIDITF	QVNGLTSIKWADNNC	1	VNGLTSIKW	GQGLNGYTVEEAKTV	3	LNGYTVEEA
TLVSDIDITFLKKDA	1	LVSDIDITF	VNGLTSIKWADNNCY	0	VNGLTSIKW	QGLNGYTVEEAKTVL	2	LNGYTVEEA
TFLKKDAPYIVGDVV	9	IVGDVVGGS	NGLTSIKWADNNCYL	2	LTSIKWADN	KKCKSAFYILPSIIS	8	ILPSIISGG
FLKKDAPYIVGDVVQ	8	IVGDVVQGG	LTSIKWADNNCYLAT	8	NNCYLATGG	CKSAFYILPSIISNE	4	FYILPSIIS
LKKDAPYIVGDVVQE	7	IVGDVVQEG	TSIKWADNNCYLATA	7	NNCYLATAG	KSAFYILPSIISNEK	10	ISNEKGGSG
KKDAPYIVGDVVQEG	6	IVGDVVQEG	SIKWADNNCYLATAL	10	LATALGGSG	SIISNEKQEILGTVS	9	ILGTVSGGS
KDAPYIVGDVVQEGV	5	IVGDVVQEG	LTLQQIELKFNPPAL	5	IELKFNPPA	IISNEKQEILGTVSW	8	ILGTVSWGG
DAPYIVGDVVQEGVL	8	VVQEGVLGG	TLQQIELKFNPPALQ	4	IELKFNPPA	ISNEKQEILGTVSWN	7	ILGTVSWNG
APYIVGDVVQEGVLT	3	IVGDVVQEG	LQQIELKFNPPALQD	3	IELKFNPPA	SNEKQEILGTVSWNL	6	ILGTVSWNL
PYIVGDVVQEGVLTA	6	VVQEGVLTA	QQIELKFNPPALQDA	2	IELKFNPPA	NEKQEILGTVSWNLR	5	ILGTVSWNL
YIVGDVVQEGVLTAV	5	VVQEGVLTA	QIELKFNPPALQDAY	1	IELKFNPPA	EKQEILGTVSWNLRE	4	ILGTVSWNL
IVGDVVQEGVLTAVV	4	VVQEGVLTA	IELKFNPPALQDAYY	0	IELKFNPPA	KQEILGTVSWNLREM	3	ILGTVSWNL
VGDVVQEGVLTAVVI	3	VVQEGVLTA	TVGELGDVRETMSYL	1	VGELGDVRE	EILGTVSWNLREMLA	1	ILGTVSWNL
GDVVQEGVLTAVVIP	2	VVQEGVLTA	GDVRETMSYLFQHAN	9	LFQHANGGS	LAHAEETRKLMPVCV	9	LMPVCVGGS
DVVQEGVLTAVVIPT	1	VVQEGVLTA	DVRETMSYLFQHANL	8	LFQHANLGG	AHAEETRKLMPVCVE	8	LMPVCVEGG
VVQEGVLTAVVIPTK	0	VVQEGVLTA	RETMSYLFQHANLDS	6	LFQHANLDS	HAEETRKLMPVCVET	7	LMPVCVETG
YPGQGLNGYTVEEAK	5	LNGYTVEEA	ETMSYLFQHANLDSC	5	LFQHANLDS	GIKIQEGVVDYGARF	7	VVDYGARFG
KKCKSAFYILPSIIS	6	FYILPSIIS	SYLFQHANLDSCKRV	2	LFQHANLDS	IKIQEGVVDYGARFY	6	VVDYGARFY
CKSAFYILPSIISNE	4	FYILPSIIS	YLFQHANLDSCKRVL	1	LFQHANLDS	KIQEGVVDYGARFYF	5	VVDYGARFY
KSAFYILPSIISNEK	3	FYILPSIIS	LFQHANLDSCKRVLN	0	LFQHANLDS	FYTSKTTVASLINTL	7	VASLINTLG
SIISNEKQEILGTVS	9	ILGTVSGGS	FQHANLDSCKRVLNV	8	CKRVLNVGG	TSKTTVASLINTLND	5	VASLINTLN
IISNEKQEILGTVSW	8	ILGTVSWGG	ANLDSCKRVLNVVCK	5	CKRVLNVVC	SKTTVASLINTLNDL	4	VASLINTLN
ISNEKQEILGTVSWN	7	ILGTVSWNG	NLDSCKRVLNVVCKT	4	CKRVLNVVC	KTTVASLINTLNDLN	3	VASLINTLN
NEKQEILGTVSWNLR	5	ILGTVSWNL	TTLKGVEAVMYMGTL	0	TTLKGVEAV	NTLNDLNETLVTMPL	2	LNDLNETLV
EKQEILGTVSWNLRE	4	ILGTVSWNL	TCGKQATKYLVQQES	9	LVQQESGGS	TLNDLNETLVTMPLG	1	LNDLNETLV
KQEILGTVSWNLREM	3	ILGTVSWNL	QQESPFVMMSAPPAQ	5	FVMMSAPPA	LNDLNETLVTMPLGY	0	LNDLNETLV
AHAEETRKLMPVCVE	8	LMPVCVEGG	ESPFVMMSAPPAQYE	3	FVMMSAPPA	DLNETLVTMPLGYVT	5	LVTMPLGYV
HAEETRKLMPVCVET	10	VCVETGGSG	KHGTFTCASEYTGNY	3	TFTCASEYT	HGLNLEEAARYMRSL	2	LNLEEAARY
RKYKGIKIQEGVVDY	10	GVVDYGGSG	YQCGHYKHITSKETL	8	ITSKETLGG	NLEEAARYMRSLKVP	10	SLKVPGGSG
KYKGIKIQEGVVDYG	10	VVDYGGGSG	QCGHYKHITSKETLY	7	ITSKETLYG	EEAARYMRSLKVPAT	10	KVPATGGSG
YKGIKIQEGVVDYGA	9	VVDYGAGGS	CGHYKHITSKETLYC	6	ITSKETLYC	EAARYMRSLKVPATV	9	KVPATVGGS
YTSKTTVASLINTLN	6	VASLINTLN	GHYKHITSKETLYCI	5	ITSKETLYC	RYMRSLKVPATVSVS	6	KVPATVSVS
SSPDAVTAYNGYLTS	8	YNGYLTSGG	HYKHITSKETLYCID	4	ITSKETLYC	EEHFIETISLAGSYK	3	FIETISLAG
PDAVTAYNGYLTSSS	9	YLTSSSGGS	YKHITSKETLYCIDG	3	ITSKETLYC	EHFIETISLAGSYKD	2	FIETISLAG
DAVTAYNGYLTSSSK	8	YLTSSSKGG	KHITSKETLYCIDGA	2	ITSKETLYC	HFIETISLAGSYKDW	1	FIETISLAG
TAYNGYLTSSSKTPE	2	YNGYLTSSS	HITSKETLYCIDGAL	1	ITSKETLYC	FIETISLAGSYKDWS	0	FIETISLAG
SSKTPEEHFIETISL	8	FIETISLGG	ITSKETLYCIDGALL	0	ITSKETLYC	IETISLAGSYKDWSY	3	ISLAGSYKD
SKTPEEHFIETISLA	7	FIETISLAG	KETLYCIDGALLTKS	10	LLTKSGGSG	ETISLAGSYKDWSYS	2	ISLAGSYKD
KTPEEHFIETISLAG	6	FIETISLAG	YKGPITDVFYKENSY	4	ITDVFYKEN	FLKRGDKSVYYTSNP	8	VYYTSNPGG
TPEEHFIETISLAGS	5	FIETISLAG	YPNASFDNFKFVCDN	8	FKFVCDNGG	RGDKSVYYTSNPTTF	5	VYYTSNPTT
EEHFIETISLAGSYK	3	FIETISLAG	PNASFDNFKFVCDNI	7	FKFVCDNIG	DKSVYYTSNPTTFHL	3	VYYTSNPTT
EHFIETISLAGSYKD	2	FIETISLAG	ASFDNFKFVCDNIKF	5	FKFVCDNIK	TTFHLDGEVITFDNL	8	VITFDNLGG
HFIETISLAGSYKDW	1	FIETISLAG	FDNFKFVCDNIKFAD	9	NIKFADGGS	TFHLDGEVITFDNLK	7	VITFDNLKG
FIETISLAGSYKDWS	0	FIETISLAG	DNFKFVCDNIKFADD	9	IKFADDGGS	FHLDGEVITFDNLKT	6	VITFDNLKT
IETISLAGSYKDWSY	3	ISLAGSYKD	NFKFVCDNIKFADDL	8	IKFADDLGG	HLDGEVITFDNLKTL	5	VITFDNLKT
AGSYKDWSYSGQSTQ	8	YSGQSTQGG	FVCDNIKFADDLNQL	7	FADDLNQLG	LDGEVITFDNLKTLL	4	VITFDNLKT
GSYKDWSYSGQSTQL	7	YSGQSTQLG	VCDNIKFADDLNQLT	6	FADDLNQLT	DGEVITFDNLKTLLS	3	VITFDNLKT
SYKDWSYSGQSTQLG	6	YSGQSTQLG	DNIKFADDLNQLTGY	4	FADDLNQLT	GEVITFDNLKTLLSL	2	VITFDNLKT
YKDWSYSGQSTQLGI	5	YSGQSTQLG	NIKFADDLNQLTGYK	3	FADDLNQLT	EVITFDNLKTLLSLR	1	VITFDNLKT
KDWSYSGQSTQLGIE	4	YSGQSTQLG	GAKLLHKPIVWHVNN	1	AKLLHKPIV	VITFDNLKTLLSLRE	0	VITFDNLKT
DWSYSGQSTQLGIEF	3	YSGQSTQLG	AKLLHKPIVWHVNNA	0	AKLLHKPIV	ITFDNLKTLLSLREV	2	FDNLKTLLS
WSYSGQSTQLGIEFL	2	YSGQSTQLG	KLLHKPIVWHVNNAT	10	VNNATGGSG	DNLKTLLSLREVRTI	2	LKTLLSLRE
SYSGQSTQLGIEFLK	1	YSGQSTQLG	LLHKPIVWHVNNATN	9	VNNATNGGS	KTLLSLREVRTIKVF	2	LLSLREVRT
YSGQSTQLGIEFLKR	0	YSGQSTQLG	LHKPIVWHVNNATNK	8	VNNATNKGG	LSLREVRTIKVFTTV	10	VFTTVGGSG
FLKRGDKSVYYTSNP	8	VYYTSNPGG	HKPIVWHVNNATNKA	7	VNNATNKAG	SLREVRTIKVFTTVD	9	VFTTVDGGS
KRGDKSVYYTSNPTT	6	VYYTSNPTT	KPIVWHVNNATNKAT	6	VNNATNKAT	LREVRTIKVFTTVDN	8	VFTTVDNGG
RGDKSVYYTSNPTTF	5	VYYTSNPTT	NATNKATYKPNTWCI	2	TNKATYKPN	REVRTIKVFTTVDNI	7	VFTTVDNIG
GDKSVYYTSNPTTFH	4	VYYTSNPTT	ATNKATYKPNTWCIR	1	TNKATYKPN	EVRTIKVFTTVDNIN	6	VFTTVDNIN
DKSVYYTSNPTTFHL	3	VYYTSNPTT	DVLKSEDAQGMDNLA	1	VLKSEDAQG	DNINLHTQVVDMSMT	9	VDMSMTGGS
KSVYYTSNPTTFHLD	2	VYYTSNPTT	VLKSEDAQGMDNLAC	0	VLKSEDAQG	NINLHTQVVDMSMTY	8	VDMSMTYGG
YYTSNPTTFHLDGEV	0	YYTSNPTTF	DLKPVSEEVVENPTI	8	VVENPTIGG	INLHTQVVDMSMTYG	7	VDMSMTYGG
YTSNPTTFHLDGEVI	7	FHLDGEVIG	ENPTIQKDVLECNVK	3	TIQKDVLEC	NLHTQVVDMSMTYGQ	1	LHTQVVDMS
SNPTTFHLDGEVITF	5	FHLDGEVIT	KTTEVVGDIILKPAN	8	IILKPANGG	LHTQVVDMSMTYGQQ	0	LHTQVVDMS
NPTTFHLDGEVITFD	4	FHLDGEVIT	TTEVVGDIILKPANN	9	LKPANNGGS	HTQVVDMSMTYGQQF	4	VDMSMTYGQ
PTTFHLDGEVITFDN	9	VITFDNGGS	EVVGDIILKPANNSL	7	LKPANNSLG	TQVVDMSMTYGQQFG	3	VDMSMTYGQ
TTFHLDGEVITFDNL	8	VITFDNLGG	VVGDIILKPANNSLK	6	LKPANNSLK	QVVDMSMTYGQQFGP	2	VDMSMTYGQ
TFHLDGEVITFDNLK	7	VITFDNLKG	VGDIILKPANNSLKI	5	LKPANNSLK	VVDMSMTYGQQFGPT	1	VDMSMTYGQ
FHLDGEVITFDNLKT	6	VITFDNLKT	GDIILKPANNSLKIT	4	LKPANNSLK	YLDGADVTKIKPHNS	1	LDGADVTKI
HLDGEVITFDNLKTL	5	VITFDNLKT	EEVGHTDLMAAYVDN	1	EVGHTDLMA	LDGADVTKIKPHNSH	0	LDGADVTKI
LDGEVITFDNLKTLL	4	VITFDNLKT	VGHTDLMAAYVDNSS	10	VDNSSGGSG	GADVTKIKPHNSHEG	6	IKPHNSHEG
DGEVITFDNLKTLLS	3	VITFDNLKT	GHTDLMAAYVDNSSL	9	VDNSSLGGS	ADVTKIKPHNSHEGK	5	IKPHNSHEG
GEVITFDNLKTLLSL	2	VITFDNLKT	LTIKKPNELSRVLGL	1	TIKKPNELS	VTKIKPHNSHEGKTF	3	IKPHNSHEG
EVITFDNLKTLLSLR	1	VITFDNLKT	IKKPNELSRVLGLKT	9	VLGLKTGGS	TKIKPHNSHEGKTFY	2	IKPHNSHEG
ITFDNLKTLLSLREV	2	FDNLKTLLS	KKPNELSRVLGLKTL	8	VLGLKTLGG	HNSHEGKTFYVLPND	10	VLPNDGGSG
DNLKTLLSLREVRTI	2	LKTLLSLRE	KPNELSRVLGLKTLA	7	VLGLKTLAG	KKWKYPQVNGLTSIK	7	VNGLTSIKG
EVRTIKVFTTVDNIN	7	FTTVDNING	PNELSRVLGLKTLAT	6	VLGLKTLAT	KYPQVNGLTSIKWAD	4	VNGLTSIKW
NLHTQVVDMSMTYGQ	1	LHTQVVDMS	NELSRVLGLKTLATH	5	VLGLKTLAT	YPQVNGLTSIKWADN	3	VNGLTSIKW
LHTQVVDMSMTYGQQ	0	LHTQVVDMS	SRVLGLKTLATHGLA	2	VLGLKTLAT	PQVNGLTSIKWADNN	2	VNGLTSIKW
HTQVVDMSMTYGQQF	3	VVDMSMTYG	NKVVSTTTNIVTRCL	3	VSTTTNIVT	QVNGLTSIKWADNNC	1	VNGLTSIKW
TQVVDMSMTYGQQFG	2	VVDMSMTYG	VSTTTNIVTRCLNRV	0	VSTTTNIVT	VNGLTSIKWADNNCY	0	VNGLTSIKW
QVVDMSMTYGQQFGP	1	VVDMSMTYG	STTTNIVTRCLNRVC	10	LNRVCGGSG	NGLTSIKWADNNCYL	5	IKWADNNCY
PHNSHEGKTFYVLPN	9	FYVLPNGGS	TNIVTRCLNRVCTNY	7	LNRVCTNYG	GLTSIKWADNNCYLA	4	IKWADNNCY
HNSHEGKTFYVLPND	5	GKTFYVLPN	NIVTRCLNRVCTNYM	6	LNRVCTNYM	TSIKWADNNCYLATA	2	IKWADNNCY
NSHEGKTFYVLPNDD	10	LPNDDGGSG	IKASMPTTIAKNTVK	6	TTIAKNTVK	SIKWADNNCYLATAL	10	LATALGGSG
HEGKTFYVLPNDDTL	8	LPNDDTLGG	YSTAALGVLMSNLGM	2	TAALGVLMS	DNNCYLATALLTLQQ	5	LATALLTLQ
EGKTFYVLPNDDTLR	7	LPNDDTLRG	STAALGVLMSNLGMP	1	TAALGVLMS	NNCYLATALLTLQQI	4	LATALLTLQ
GKTFYVLPNDDTLRV	6	LPNDDTLRV	GSIPCSVCLSGLDSL	8	LSGLDSLGG	NCYLATALLTLQQIE	3	LATALLTLQ
KTFYVLPNDDTLRVE	5	LPNDDTLRV	CSVCLSGLDSLDTYP	4	LSGLDSLDT	LTLQQIELKFNPPAL	6	ELKFNPPAL
TFYVLPNDDTLRVEA	4	LPNDDTLRV	VCLSGLDSLDTYPSL	2	LSGLDSLDT	LQQIELKFNPPALQD	4	ELKFNPPAL
TTDPSFLGRYMSALN	6	LGRYMSALN	CLSGLDSLDTYPSLE	1	LSGLDSLDT	QQIELKFNPPALQDA	3	ELKFNPPAL
PQVNGLTSIKWADNN	8	IKWADNNGG	LSGLDSLDTYPSLET	0	LSGLDSLDT	QIELKFNPPALQDAY	2	ELKFNPPAL
QVNGLTSIKWADNNC	7	IKWADNNCG	SGLDSLDTYPSLETI	5	LDTYPSLET	LAYCNKTVGELGDVR	0	LAYCNKTVG
LTSIKWADNNCYLAT	8	NNCYLATGG	GLDSLDTYPSLETIQ	4	LDTYPSLET	TVGELGDVRETMSYL	7	VRETMSYLG
TSIKWADNNCYLATA	7	NNCYLATAG	LDSLDTYPSLETIQI	3	LDTYPSLET	ELGDVRETMSYLFQH	4	VRETMSYLF
SIKWADNNCYLATAL	10	LATALGGSG	SLDTYPSLETIQITI	1	LDTYPSLET	DVRETMSYLFQHANL	8	LFQHANLGG
KWADNNCYLATALLT	8	LATALLTGG	INLVQMAPISAMVRM	0	INLVQMAPI	ETMSYLFQHANLDSC	5	LFQHANLDS
ELKFNPPALQDAYYR	0	ELKFNPPAL	NLVQMAPISAMVRMY	1	LVQMAPISA	HANLDSCKRVLNVVC	9	VLNVVCGGS
QDAYYRARAGEAANF	3	YYRARAGEA	VDGCNSSTCMMCYKR	0	VDGCNSSTC	ANLDSCKRVLNVVCK	8	VLNVVCKGG
DAYYRARAGEAANFC	2	YYRARAGEA	DGCNSSTCMMCYKRN	10	CYKRNGGSG	RVLNVVCKTCGQQQT	1	VLNVVCKTC
YYRARAGEAANFCAL	0	YYRARAGEA	GCNSSTCMMCYKRNR	1	CNSSTCMMC	CGQQQTTLKGVEAVM	5	TTLKGVEAV
GDVRETMSYLFQHAN	2	VRETMSYLF	CNSSTCMMCYKRNRA	0	CNSSTCMMC	QTTLKGVEAVMYMGT	1	TTLKGVEAV
DVRETMSYLFQHANL	1	VRETMSYLF	NGGKGFCKLHNWNCV	2	GKGFCKLHN	TTLKGVEAVMYMGTL	8	VMYMGTLGG
RETMSYLFQHANLDS	10	ANLDSGGSG	GGKGFCKLHNWNCVN	1	GKGFCKLHN	TLKGVEAVMYMGTLS	7	VMYMGTLSG
ETMSYLFQHANLDSC	9	ANLDSCGGS	KLHNWNCVNCDTFCA	9	CDTFCAGGS	VEAVMYMGTLSYEQF	3	VMYMGTLSY
YLFQHANLDSCKRVL	5	ANLDSCKRV	NPTDQSSYIVDSVTV	9	VDSVTVGGS	EAVMYMGTLSYEQFK	2	VMYMGTLSY
TTLKGVEAVMYMGTL	8	VMYMGTLGG	PTDQSSYIVDSVTVK	8	VDSVTVKGG	TCGKQATKYLVQQES	9	LVQQESGGS
TLKGVEAVMYMGTLS	9	YMGTLSGGS	DQSSYIVDSVTVKNG	6	VDSVTVKNG	GKQATKYLVQQESPF	7	LVQQESPFG
LKGVEAVMYMGTLSY	8	YMGTLSYGG	SYIVDSVTVKNGSIH	3	VDSVTVKNG	QATKYLVQQESPFVM	5	LVQQESPFV
KGVEAVMYMGTLSYE	7	YMGTLSYEG	KNGSIHLYFDKAGQK	4	IHLYFDKAG	ATKYLVQQESPFVMM	4	LVQQESPFV
GVEAVMYMGTLSYEQ	10	LSYEQGGSG	NGSIHLYFDKAGQKT	3	IHLYFDKAG	TKYLVQQESPFVMMS	3	LVQQESPFV
VEAVMYMGTLSYEQF	5	YMGTLSYEQ	GSIHLYFDKAGQKTY	2	IHLYFDKAG	KYLVQQESPFVMMSA	2	LVQQESPFV
EAVMYMGTLSYEQFK	4	YMGTLSYEQ	QKTYERHSLSHFVNL	7	SLSHFVNLG	YLVQQESPFVMMSAP	1	LVQQESPFV
YMGTLSYEQFKKGVQ	0	YMGTLSYEQ	ERHSLSHFVNLDNLR	7	FVNLDNLRG	VQQESPFVMMSAPPA	7	VMMSAPPAG
CGKQATKYLVQQESP	8	LVQQESPGG	RHSLSHFVNLDNLRA	6	FVNLDNLRA	QQESPFVMMSAPPAQ	6	VMMSAPPAQ
GKQATKYLVQQESPF	7	LVQQESPFG	HSLSHFVNLDNLRAN	5	FVNLDNLRA	QESPFVMMSAPPAQY	5	VMMSAPPAQ
QATKYLVQQESPFVM	5	LVQQESPFV	SLSHFVNLDNLRANN	4	FVNLDNLRA	PFVMMSAPPAQYELK	2	VMMSAPPAQ
ATKYLVQQESPFVMM	4	LVQQESPFV	SHFVNLDNLRANNTK	2	FVNLDNLRA	KHGTFTCASEYTGNY	0	KHGTFTCAS
TKYLVQQESPFVMMS	3	LVQQESPFV	KSASVYYSQLMCQPI	2	ASVYYSQLM	YQCGHYKHITSKETL	8	ITSKETLGG
KYLVQQESPFVMMSA	2	LVQQESPFV	SASVYYSQLMCQPIL	8	LMCQPILGG	HYKHITSKETLYCID	10	LYCIDGGSG
YLVQQESPFVMMSAP	1	LVQQESPFV	YSQLMCQPILLLDQA	9	LLLDQAGGS	KHITSKETLYCIDGA	2	ITSKETLYC
LVQQESPFVMMSAPP	0	LVQQESPFV	VGDSAEVAVKMFDAY	1	GDSAEVAVK	HITSKETLYCIDGAL	10	IDGALGGSG
VQQESPFVMMSAPPA	6	FVMMSAPPA	GDSAEVAVKMFDAYV	0	GDSAEVAVK	DNSYFTEQPIDLVPN	9	IDLVPNGGS
QQESPFVMMSAPPAQ	5	FVMMSAPPA	DSAEVAVKMFDAYVN	6	VKMFDAYVN	NSYFTEQPIDLVPNQ	8	IDLVPNQGG
QESPFVMMSAPPAQY	4	FVMMSAPPA	EVAVKMFDAYVNTFS	10	VNTFSGGSG	SYFTEQPIDLVPNQP	7	IDLVPNQPG
SPFVMMSAPPAQYEL	2	FVMMSAPPA	KMFDAYVNTFSSTFN	6	VNTFSSTFN	TEQPIDLVPNQPYPN	4	IDLVPNQPY
PFVMMSAPPAQYELK	1	FVMMSAPPA	FDAYVNTFSSTFNVP	4	VNTFSSTFN	YPNASFDNFKFVCDN	2	NASFDNFKF
AQYELKHGTFTCASE	9	FTCASEGGS	DAYVNTFSSTFNVPM	3	VNTFSSTFN	PNASFDNFKFVCDNI	1	NASFDNFKF
QYELKHGTFTCASEY	8	FTCASEYGG	AYVNTFSSTFNVPME	2	VNTFSSTFN	NASFDNFKFVCDNIK	0	NASFDNFKF
YELKHGTFTCASEYT	7	FTCASEYTG	YVNTFSSTFNVPMEK	1	VNTFSSTFN	ASFDNFKFVCDNIKF	7	FVCDNIKFG
ELKHGTFTCASEYTG	6	FTCASEYTG	NVPMEKLKTLVATAE	10	VATAEGGSG	FDNFKFVCDNIKFAD	10	IKFADGGSG
KHGTFTCASEYTGNY	4	FTCASEYTG	VPMEKLKTLVATAEA	9	VATAEAGGS	NFKFVCDNIKFADDL	8	IKFADDLGG
GTFTCASEYTGNYQC	2	FTCASEYTG	KNVSLDNVLSTFISA	2	VSLDNVLST	FVCDNIKFADDLNQL	7	FADDLNQLG
TFTCASEYTGNYQCG	1	FTCASEYTG	VSLDNVLSTFISAAR	0	VSLDNVLST	VCDNIKFADDLNQLT	6	FADDLNQLT
YTGNYQCGHYKHITS	9	YKHITSGGS	SLDNVLSTFISAARQ	5	LSTFISAAR	CDNIKFADDLNQLTG	5	FADDLNQLT
TGNYQCGHYKHITSK	8	YKHITSKGG	DNVLSTFISAARQGF	3	LSTFISAAR	DNIKFADDLNQLTGY	4	FADDLNQLT
QCGHYKHITSKETLY	8	TSKETLYGG	NVLSTFISAARQGFV	2	LSTFISAAR	NIKFADDLNQLTGYK	3	FADDLNQLT
CGHYKHITSKETLYC	10	ETLYCGGSG	VDSDVETKDVVECLK	4	VETKDVVEC	KPASRELKVTFFPDL	8	VTFFPDLGG
YKHITSKETLYCIDG	10	YCIDGGGSG	DSDVETKDVVECLKL	3	VETKDVVEC	PASRELKVTFFPDLN	9	FFPDLNGGS
KHITSKETLYCIDGA	9	YCIDGAGGS	SDVETKDVVECLKLS	2	VETKDVVEC	ASRELKVTFFPDLNG	6	VTFFPDLNG
HITSKETLYCIDGAL	8	YCIDGALGG	DVETKDVVECLKLSH	1	VETKDVVEC	SRELKVTFFPDLNGD	5	VTFFPDLNG
ITSKETLYCIDGALL	7	YCIDGALLG	VETKDVVECLKLSHQ	0	VETKDVVEC	RELKVTFFPDLNGDV	10	LNGDVGGSG
TSKETLYCIDGALLT	6	YCIDGALLT	ETKDVVECLKLSHQS	6	ECLKLSHQS	ELKVTFFPDLNGDVV	9	LNGDVVGGS
SKETLYCIDGALLTK	5	YCIDGALLT	KDVVECLKLSHQSDI	4	ECLKLSHQS	KVTFFPDLNGDVVAI	7	LNGDVVAIG
KETLYCIDGALLTKS	4	YCIDGALLT	NYMLTYNKVENMTPR	8	VENMTPRGG	VTFFPDLNGDVVAID	6	LNGDVVAID
ETLYCIDGALLTKSS	3	YCIDGALLT	IDCSARHINAQVAKS	3	SARHINAQV	GDVVAIDYKHYTPSF	3	VAIDYKHYT
LYCIDGALLTKSSEY	1	YCIDGALLT	AQVAKSHNIALIWNV	8	IALIWNVGG	AKLLHKPIVWHVNNA	7	IVWHVNNAG
YCIDGALLTKSSEYK	0	YCIDGALLT	SHNIALIWNVKDFMS	9	VKDFMSGGS	VETSNSFDVLKSEDA	3	SNSFDVLKS
EYKGPITDVFYKENS	9	FYKENSGGS	KKNNLPFKLTCATTR	8	LTCATTRGG	TSNSFDVLKSEDAQG	1	SNSFDVLKS
YKGPITDVFYKENSY	8	FYKENSYGG	KNNLPFKLTCATTRQ	7	LTCATTRQG	SNSFDVLKSEDAQGM	0	SNSFDVLKS
KGPITDVFYKENSYT	7	FYKENSYTG	NNLPFKLTCATTRQV	6	LTCATTRQV	NSFDVLKSEDAQGMD	4	VLKSEDAQG
ITDVFYKENSYTTTI	4	FYKENSYTT	NLPFKLTCATTRQVV	5	LTCATTRQV	SFDVLKSEDAQGMDN	3	VLKSEDAQG
TDVFYKENSYTTTIK	3	FYKENSYTT	KLTCATTRQVVNVVT	1	LTCATTRQV	FDVLKSEDAQGMDNL	2	VLKSEDAQG
VFYKENSYTTTIKPV	1	FYKENSYTT	QVVNVVTTKIALKGG	5	VTTKIALKG	DVLKSEDAQGMDNLA	7	AQGMDNLAG
YTTTIKPVTYKLDGV	9	YKLDGVGGS	YLITPVHVMSKHTDF	2	ITPVHVMSK	VLKSEDAQGMDNLAC	0	VLKSEDAQG
TTTIKPVTYKLDGVV	8	YKLDGVVGG	ITPVHVMSKHTDFSS	5	VMSKHTDFS	LKSEDAQGMDNLACE	5	AQGMDNLAC
TTIKPVTYKLDGVVC	7	YKLDGVVCG	VMSKHTDFSSEIIGY	0	VMSKHTDFS	DAQGMDNLACEDLKP	1	AQGMDNLAC
TIKPVTYKLDGVVCT	6	YKLDGVVCT	SKHTDFSSEIIGYKA	9	IIGYKAGGS	DLKPVSEEVVENPTI	1	LKPVSEEVV
IKPVTYKLDGVVCTE	5	YKLDGVVCT	KHTDFSSEIIGYKAI	8	IIGYKAIGG	VENPTIQKDVLECNV	9	VLECNVGGS
KPVTYKLDGVVCTEI	4	YKLDGVVCT	HTDFSSEIIGYKAID	7	IIGYKAIDG	ENPTIQKDVLECNVK	8	VLECNVKGG
TYKLDGVVCTEIDPK	1	YKLDGVVCT	TDFSSEIIGYKAIDG	6	IIGYKAIDG	KDVLECNVKTTEVVG	7	VKTTEVVGG
IDPKLDNYYKKDNSY	8	YKKDNSYGG	DFSSEIIGYKAIDGG	5	IIGYKAIDG	ECNVKTTEVVGDIIL	8	VVGDIILGG
DPKLDNYYKKDNSYF	7	YKKDNSYFG	FSSEIIGYKAIDGGV	4	IIGYKAIDG	CNVKTTEVVGDIILK	7	VVGDIILKG
LDNYYKKDNSYFTEQ	4	YKKDNSYFT	SSEIIGYKAIDGGVT	3	IIGYKAIDG	NVKTTEVVGDIILKP	1	VKTTEVVGD
DNYYKKDNSYFTEQP	3	YKKDNSYFT	SEIIGYKAIDGGVTR	2	IIGYKAIDG	VKTTEVVGDIILKPA	0	VKTTEVVGD
NYYKKDNSYFTEQPI	2	YKKDNSYFT	EIIGYKAIDGGVTRD	1	IIGYKAIDG	KTTEVVGDIILKPAN	10	LKPANGGSG
YYKKDNSYFTEQPID	1	YKKDNSYFT	IDGGVTRDIASTDTC	5	TRDIASTDT	TTEVVGDIILKPANN	9	LKPANNGGS
DNSYFTEQPIDLVPN	9	IDLVPNGGS	DGGVTRDIASTDTCF	4	TRDIASTDT	TEVVGDIILKPANNS	8	LKPANNSGG
NSYFTEQPIDLVPNQ	8	IDLVPNQGG	GGVTRDIASTDTCFA	3	TRDIASTDT	EVVGDIILKPANNSL	7	LKPANNSLG
YPNASFDNFKFVCDN	10	FVCDNGGSG	GVTRDIASTDTCFAN	2	TRDIASTDT	VVGDIILKPANNSLK	6	LKPANNSLK
PNASFDNFKFVCDNI	1	NASFDNFKF	VTRDIASTDTCFANK	1	TRDIASTDT	GDIILKPANNSLKIT	4	LKPANNSLK
NASFDNFKFVCDNIK	0	NASFDNFKF	TRDIASTDTCFANKH	0	TRDIASTDT	DIILKPANNSLKITE	3	LKPANNSLK
ASFDNFKFVCDNIKF	7	FVCDNIKFG	RDIASTDTCFANKHA	10	ANKHAGGSG	ITEEVGHTDLMAAYV	9	LMAAYVGGS
SFDNFKFVCDNIKFA	6	FVCDNIKFA	DIASTDTCFANKHAD	9	ANKHADGGS	TEEVGHTDLMAAYVD	8	LMAAYVDGG
FDNFKFVCDNIKFAD	5	FVCDNIKFA	IASTDTCFANKHADF	8	ANKHADFGG	EEVGHTDLMAAYVDN	9	AAYVDNGGS
DNFKFVCDNIKFADD	4	FVCDNIKFA	CFANKHADFDTWFSQ	2	ANKHADFDT	EVGHTDLMAAYVDNS	8	AAYVDNSGG
NFKFVCDNIKFADDL	10	FADDLGGSG	FANKHADFDTWFSQR	1	ANKHADFDT	GHTDLMAAYVDNSSL	6	AAYVDNSSL
KFVCDNIKFADDLNQ	8	FADDLNQGG	ANKHADFDTWFSQRG	0	ANKHADFDT	HTDLMAAYVDNSSLT	8	VDNSSLTGG
FVCDNIKFADDLNQL	7	FADDLNQLG	NKHADFDTWFSQRGG	5	FDTWFSQRG	TDLMAAYVDNSSLTI	7	VDNSSLTIG
VCDNIKFADDLNQLT	6	FADDLNQLT	KHADFDTWFSQRGGS	4	FDTWFSQRG	DLMAAYVDNSSLTIK	6	VDNSSLTIK
CDNIKFADDLNQLTG	5	FADDLNQLT	HADFDTWFSQRGGSY	3	FDTWFSQRG	KKPNELSRVLGLKTL	8	VLGLKTLGG
DNIKFADDLNQLTGY	4	FADDLNQLT	ADFDTWFSQRGGSYT	2	FDTWFSQRG	KPNELSRVLGLKTLA	7	VLGLKTLAG
NIKFADDLNQLTGYK	3	FADDLNQLT	TNDKACPLIAAVITR	8	IAAVITRGG	PNELSRVLGLKTLAT	6	VLGLKTLAT
KFADDLNQLTGYKKP	1	FADDLNQLT	NDKACPLIAAVITRE	7	IAAVITREG	NELSRVLGLKTLATH	5	VLGLKTLAT
FADDLNQLTGYKKPA	0	FADDLNQLT	DKACPLIAAVITREV	6	IAAVITREV	SRVLGLKTLATHGLA	2	VLGLKTLAT
ASRELKVTFFPDLNG	8	FFPDLNGGG	ACPLIAAVITREVGF	4	IAAVITREV	KPFLNKVVSTTTNIV	6	VVSTTTNIV
SRELKVTFFPDLNGD	7	FFPDLNGDG	FVVPGLPGTILRTTN	9	ILRTTNGGS	PFLNKVVSTTTNIVT	5	VVSTTTNIV
RELKVTFFPDLNGDV	10	LNGDVGGSG	VPGLPGTILRTTNGD	5	GTILRTTNG	NKVVSTTTNIVTRCL	2	VVSTTTNIV
ELKVTFFPDLNGDVV	9	LNGDVVGGS	DFLHFLPRVFSAVGN	5	LPRVFSAVG	KVVSTTTNIVTRCLN	1	VVSTTTNIV
KVTFFPDLNGDVVAI	7	LNGDVVAIG	HFLPRVFSAVGNICY	2	LPRVFSAVG	VSTTTNIVTRCLNRV	0	VSTTTNIVT
VTFFPDLNGDVVAID	6	LNGDVVAID	LPRVFSAVGNICYTP	0	LPRVFSAVG	STTTNIVTRCLNRVC	6	VTRCLNRVC
TFFPDLNGDVVAIDY	5	LNGDVVAID	PRVFSAVGNICYTPS	6	VGNICYTPS	NIVTRCLNRVCTNYM	2	VTRCLNRVC
FFPDLNGDVVAIDYK	4	LNGDVVAID	RVFSAVGNICYTPSK	5	VGNICYTPS	RCLNRVCTNYMPYFF	2	LNRVCTNYM
KPVETSNSFDVLKSE	5	SNSFDVLKS	FSAVGNICYTPSKLI	3	VGNICYTPS	NTVKSVGKFCLEASF	5	VGKFCLEAS
VETSNSFDVLKSEDA	9	LKSEDAGGS	SAVGNICYTPSKLIE	2	VGNICYTPS	YSTAALGVLMSNLGM	5	LGVLMSNLG
ETSNSFDVLKSEDAQ	8	LKSEDAQGG	AVGNICYTPSKLIEY	1	VGNICYTPS	STAALGVLMSNLGMP	4	LGVLMSNLG
TSNSFDVLKSEDAQG	7	LKSEDAQGG	VGNICYTPSKLIEYT	0	VGNICYTPS	GYLNSTNVTIATYCT	2	LNSTNVTIA
SNSFDVLKSEDAQGM	6	LKSEDAQGM	GNICYTPSKLIEYTD	9	LIEYTDGGS	GSIPCSVCLSGLDSL	8	LSGLDSLGG
NSFDVLKSEDAQGMD	5	LKSEDAQGM	NICYTPSKLIEYTDF	8	LIEYTDFGG	SIPCSVCLSGLDSLD	7	LSGLDSLDG
SFDVLKSEDAQGMDN	4	LKSEDAQGM	TPSKLIEYTDFATSA	4	LIEYTDFAT	CSVCLSGLDSLDTYP	4	LSGLDSLDT
FDVLKSEDAQGMDNL	3	LKSEDAQGM	EYTDFATSACVLAAE	5	ATSACVLAA	SVCLSGLDSLDTYPS	3	LSGLDSLDT
DVLKSEDAQGMDNLA	2	LKSEDAQGM	DFATSACVLAAECTI	2	ATSACVLAA	VCLSGLDSLDTYPSL	2	LSGLDSLDT
VLKSEDAQGMDNLAC	1	LKSEDAQGM	ECTIFKDASGKPVPY	7	ASGKPVPYG	CLSGLDSLDTYPSLE	1	LSGLDSLDT
DLKPVSEEVVENPTI	1	LKPVSEEVV	KDASGKPVPYCYDTN	2	ASGKPVPYC	LSGLDSLDTYPSLET	0	LSGLDSLDT
LKPVSEEVVENPTIQ	0	LKPVSEEVV	DTNVLEGSVAYESLR	3	VLEGSVAYE	SGLDSLDTYPSLETI	5	LDTYPSLET
LECNVKTTEVVGDII	9	VVGDIIGGS	LRPDTRYVLMDGSII	7	VLMDGSIIG	GLDSLDTYPSLETIQ	4	LDTYPSLET
ECNVKTTEVVGDIIL	8	VVGDIILGG	PDTRYVLMDGSIIQF	5	VLMDGSIIQ	LDSLDTYPSLETIQI	3	LDTYPSLET
CNVKTTEVVGDIILK	7	VVGDIILKG	RYVLMDGSIIQFPNT	8	IIQFPNTGG	DSLDTYPSLETIQIT	2	LDTYPSLET
TTEVVGDIILKPANN	9	LKPANNGGS	YVLMDGSIIQFPNTY	7	IIQFPNTYG	INLVQMAPISAMVRM	1	NLVQMAPIS
TEVVGDIILKPANNS	8	LKPANNSGG	VLMDGSIIQFPNTYL	6	IIQFPNTYL	NLVQMAPISAMVRMY	0	NLVQMAPIS
EVVGDIILKPANNSL	7	LKPANNSLG	LMDGSIIQFPNTYLE	5	IIQFPNTYL	NRATRVECTTIVNGV	6	ECTTIVNGV
VGHTDLMAAYVDNSS	8	AYVDNSSGG	MDGSIIQFPNTYLEG	4	IIQFPNTYL	KLHNWNCVNCDTFCA	6	CVNCDTFCA
GHTDLMAAYVDNSSL	7	AYVDNSSLG	DGSIIQFPNTYLEGS	3	IIQFPNTYL	HNWNCVNCDTFCAGS	5	VNCDTFCAG
HTDLMAAYVDNSSLT	6	AYVDNSSLT	GSIIQFPNTYLEGSV	2	IIQFPNTYL	DTFCAGSTFISDEVA	9	ISDEVAGGS
TDLMAAYVDNSSLTI	5	AYVDNSSLT	SIIQFPNTYLEGSVR	1	IIQFPNTYL	TFCAGSTFISDEVAR	8	ISDEVARGG
DLMAAYVDNSSLTIK	4	AYVDNSSLT	PNTYLEGSVRVVTTF	2	TYLEGSVRV	GSTFISDEVARDLSL	8	VARDLSLGG
KKPNELSRVLGLKTL	5	LSRVLGLKT	RVVTTFDSEYCRHGT	2	VTTFDSEYC	TFISDEVARDLSLQF	6	VARDLSLQF
KPNELSRVLGLKTLA	7	VLGLKTLAG	CGVDAVNLLTNMFTP	5	VNLLTNMFT	FISDEVARDLSLQFK	5	VARDLSLQF
NELSRVLGLKTLATH	5	VLGLKTLAT	GVDAVNLLTNMFTPL	4	VNLLTNMFT	ISDEVARDLSLQFKR	4	VARDLSLQF
VSTTTNIVTRCLNRV	0	VSTTTNIVT	VDAVNLLTNMFTPLI	3	VNLLTNMFT	SDEVARDLSLQFKRP	3	VARDLSLQF
STTTNIVTRCLNRVC	10	LNRVCGGSG	DAVNLLTNMFTPLIQ	2	VNLLTNMFT	DEVARDLSLQFKRPI	2	VARDLSLQF
NIVTRCLNRVCTNYM	6	LNRVCTNYM	NLLTNMFTPLIQPIG	2	LTNMFTPLI	EVARDLSLQFKRPIN	1	VARDLSLQF
TRCLNRVCTNYMPYF	3	LNRVCTNYM	TNMFTPLIQPIGALD	10	IGALDGGSG	NPTDQSSYIVDSVTV	8	IVDSVTVGG
RCLNRVCTNYMPYFF	2	LNRVCTNYM	MFTPLIQPIGALDIS	9	GALDISGGS	PTDQSSYIVDSVTVK	7	IVDSVTVKG
QLCTFTRSTNSRIKA	4	FTRSTNSRI	ALDISASIVAGGIVA	1	LDISASIVA	TDQSSYIVDSVTVKN	6	IVDSVTVKN
CTFTRSTNSRIKASM	2	FTRSTNSRI	LDISASIVAGGIVAI	0	LDISASIVA	DQSSYIVDSVTVKNG	5	IVDSVTVKN
TFTRSTNSRIKASMP	1	FTRSTNSRI	RAFGEYSHVVAFNTL	8	VVAFNTLGG	QSSYIVDSVTVKNGS	4	IVDSVTVKN
KNTVKSVGKFCLEAS	9	FCLEASGGS	AFGEYSHVVAFNTLL	7	VVAFNTLLG	NGSIHLYFDKAGQKT	9	KAGQKTGGS
NTVKSVGKFCLEASF	8	FCLEASFGG	GEYSHVVAFNTLLFL	5	VVAFNTLLF	GSIHLYFDKAGQKTY	2	IHLYFDKAG
KSVGKFCLEASFNYL	7	LEASFNYLG	LTPVYSFLPGVYSVI	7	LPGVYSVIG	QKTYERHSLSHFVNL	7	SLSHFVNLG
SVGKFCLEASFNYLK	1	VGKFCLEAS	NYLKRRVVFNGVSFS	6	VVFNGVSFS	YERHSLSHFVNLDNL	8	FVNLDNLGG
KFCLEASFNYLKSPN	4	EASFNYLKS	KRRVVFNGVSFSTFE	7	GVSFSTFEG	ERHSLSHFVNLDNLR	7	FVNLDNLRG
FCLEASFNYLKSPNF	3	EASFNYLKS	RVVFNGVSFSTFEEA	1	VVFNGVSFS	RHSLSHFVNLDNLRA	6	FVNLDNLRA
EASFNYLKSPNFSKL	0	EASFNYLKS	VVFNGVSFSTFEEAA	0	VVFNGVSFS	HSLSHFVNLDNLRAN	5	FVNLDNLRA
YSTAALGVLMSNLGM	5	LGVLMSNLG	FSTFEEAALCTFLLN	5	EAALCTFLL	SLSHFVNLDNLRANN	4	FVNLDNLRA
STAALGVLMSNLGMP	4	LGVLMSNLG	EEAALCTFLLNKEMY	1	EAALCTFLL	SHFVNLDNLRANNTK	2	FVNLDNLRA
GVLMSNLGMPSYCTG	0	GVLMSNLGM	LLNKEMYLKLRSDVL	7	LKLRSDVLG	HFVNLDNLRANNTKG	1	FVNLDNLRA
SNLGMPSYCTGYREG	10	GYREGGGSG	NKYKYFSGAMDTTSY	5	FSGAMDTTS	FVNLDNLRANNTKGS	0	FVNLDNLRA
STNVTIATYCTGSIP	5	IATYCTGSI	PQTSITSAVLQSGFR	3	SITSAVLQS	KSASVYYSQLMCQPI	4	VYYSQLMCQ
GSIPCSVCLSGLDSL	8	LSGLDSLGG	KMAFPSGKVEGCMVQ	2	AFPSGKVEG	SASVYYSQLMCQPIL	3	VYYSQLMCQ
QITISSFKWDLTAFG	6	FKWDLTAFG	MAFPSGKVEGCMVQV	7	VEGCMVQVG	YSQLMCQPILLLDQA	9	LLLDQAGGS
TISSFKWDLTAFGLV	4	FKWDLTAFG	GKVEGCMVQVTCGTT	9	VTCGTTGGS	SQLMCQPILLLDQAL	8	LLLDQALGG
ISSFKWDLTAFGLVA	6	DLTAFGLVA	EGCMVQVTCGTTTLN	6	VTCGTTTLN	QLMCQPILLLDQALV	7	LLLDQALVG
SSFKWDLTAFGLVAE	5	DLTAFGLVA	GCMVQVTCGTTTLNG	5	VTCGTTTLN	LMCQPILLLDQALVS	6	LLLDQALVS
SFKWDLTAFGLVAEW	4	DLTAFGLVA	VQVTCGTTTLNGLWL	2	VTCGTTTLN	MCQPILLLDQALVSD	5	LLLDQALVS
NWNCVNCDTFCAGST	8	TFCAGSTGG	QVTCGTTTLNGLWLD	1	VTCGTTTLN	CQPILLLDQALVSDV	4	LLLDQALVS
NCVNCDTFCAGSTFI	6	TFCAGSTFI	MLNPNYEDLLIRKSN	9	LIRKSNGGS	QPILLLDQALVSDVG	3	LLLDQALVS
VNCDTFCAGSTFISD	4	TFCAGSTFI	LNPNYEDLLIRKSNH	8	LIRKSNHGG	VGDSAEVAVKMFDAY	8	VKMFDAYGG
NCDTFCAGSTFISDE	10	FISDEGGSG	NPNYEDLLIRKSNHN	7	LIRKSNHNG	GDSAEVAVKMFDAYV	7	VKMFDAYVG
CDTFCAGSTFISDEV	9	FISDEVGGS	PNYEDLLIRKSNHNF	5	LLIRKSNHN	DSAEVAVKMFDAYVN	6	VKMFDAYVN
DTFCAGSTFISDEVA	8	FISDEVAGG	NYEDLLIRKSNHNFL	4	LLIRKSNHN	FDAYVNTFSSTFNVP	4	VNTFSSTFN
TFCAGSTFISDEVAR	7	FISDEVARG	YEDLLIRKSNHNFLV	3	LLIRKSNHN	DAYVNTFSSTFNVPM	3	VNTFSSTFN
FCAGSTFISDEVARD	6	FISDEVARD	EDLLIRKSNHNFLVQ	2	LLIRKSNHN	AYVNTFSSTFNVPME	2	VNTFSSTFN
CAGSTFISDEVARDL	10	VARDLGGSG	DLLIRKSNHNFLVQA	1	LLIRKSNHN	YVNTFSSTFNVPMEK	1	VNTFSSTFN
AGSTFISDEVARDLS	9	VARDLSGGS	RKSNHNFLVQAGNVQ	7	LVQAGNVQG	TFSSTFNVPMEKLKT	2	SSTFNVPME
GSTFISDEVARDLSL	8	VARDLSLGG	SNHNFLVQAGNVQLR	5	LVQAGNVQL	TFNVPMEKLKTLVAT	8	LKTLVATGG
STFISDEVARDLSLQ	7	VARDLSLQG	NHNFLVQAGNVQLRV	4	LVQAGNVQL	NVPMEKLKTLVATAE	6	LKTLVATAE
TFISDEVARDLSLQF	6	VARDLSLQF	QAGNVQLRVIGHSMQ	8	VIGHSMQGG	VPMEKLKTLVATAEA	5	LKTLVATAE
FISDEVARDLSLQFK	5	VARDLSLQF	AGNVQLRVIGHSMQN	7	VIGHSMQNG	AEAELAKNVSLDNVL	8	VSLDNVLGG
SDEVARDLSLQFKRP	3	VARDLSLQF	GNVQLRVIGHSMQNC	6	VIGHSMQNC	EAELAKNVSLDNVLS	7	VSLDNVLSG
DEVARDLSLQFKRPI	2	VARDLSLQF	NVQLRVIGHSMQNCV	5	VIGHSMQNC	ELAKNVSLDNVLSTF	5	VSLDNVLST
EVARDLSLQFKRPIN	1	VARDLSLQF	VQLRVIGHSMQNCVL	4	VIGHSMQNC	LAKNVSLDNVLSTFI	4	VSLDNVLST
INPTDQSSYIVDSVT	8	YIVDSVTGG	QLRVIGHSMQNCVLK	3	VIGHSMQNC	AKNVSLDNVLSTFIS	3	VSLDNVLST
NPTDQSSYIVDSVTV	7	YIVDSVTVG	RVIGHSMQNCVLKLK	10	VLKLKGGSG	VSLDNVLSTFISAAR	0	VSLDNVLST
PTDQSSYIVDSVTVK	6	YIVDSVTVK	GHSMQNCVLKLKVDT	7	VLKLKVDTG	SLDNVLSTFISAARQ	1	LDNVLSTFI
TDQSSYIVDSVTVKN	5	YIVDSVTVK	HSMQNCVLKLKVDTA	6	VLKLKVDTA	DNVLSTFISAARQGF	2	VLSTFISAA
DQSSYIVDSVTVKNG	4	YIVDSVTVK	SMQNCVLKLKVDTAN	5	VLKLKVDTA	NVLSTFISAARQGFV	1	VLSTFISAA
QSSYIVDSVTVKNGS	3	YIVDSVTVK	MQNCVLKLKVDTANP	4	VLKLKVDTA	VDSDVETKDVVECLK	5	ETKDVVECL
SYIVDSVTVKNGSIH	1	YIVDSVTVK	QNCVLKLKVDTANPK	3	VLKLKVDTA	DVETKDVVECLKLSH	2	ETKDVVECL
TYERHSLSHFVNLDN	9	FVNLDNGGS	IQPGQTFSVLACYNG	3	GQTFSVLAC	VETKDVVECLKLSHQ	1	ETKDVVECL
YERHSLSHFVNLDNL	8	FVNLDNLGG	QPGQTFSVLACYNGS	2	GQTFSVLAC	ETKDVVECLKLSHQS	0	ETKDVVECL
ERHSLSHFVNLDNLR	7	FVNLDNLRG	PGQTFSVLACYNGSP	1	GQTFSVLAC	TKDVVECLKLSHQSD	3	VVECLKLSH
RHSLSHFVNLDNLRA	6	FVNLDNLRA	GQTFSVLACYNGSPS	6	LACYNGSPS	DVVECLKLSHQSDIE	1	VVECLKLSH
HSLSHFVNLDNLRAN	5	FVNLDNLRA	GSPSGVYQCAMRPNF	5	VYQCAMRPN	KLSHQSDIEVTGDSC	9	VTGDSCGGS
SLSHFVNLDNLRANN	4	FVNLDNLRA	YQCAMRPNFTIKGSF	8	FTIKGSFGG	LSHQSDIEVTGDSCN	8	VTGDSCNGG
SHFVNLDNLRANNTK	2	FVNLDNLRA	QCAMRPNFTIKGSFL	7	FTIKGSFLG	NYMLTYNKVENMTPR	0	NYMLTYNKV
HFVNLDNLRANNTKG	1	FVNLDNLRA	CAMRPNFTIKGSFLN	6	FTIKGSFLN	MTPRDLGACIDCSAR	5	LGACIDCSA
SAKSASVYYSQLMCQ	1	AKSASVYYS	AMRPNFTIKGSFLNG	5	FTIKGSFLN	TPRDLGACIDCSARH	4	LGACIDCSA
KSASVYYSQLMCQPI	2	ASVYYSQLM	MRPNFTIKGSFLNGS	4	FTIKGSFLN	PRDLGACIDCSARHI	3	LGACIDCSA
SASVYYSQLMCQPIL	1	ASVYYSQLM	NFTIKGSFLNGSCGS	1	FTIKGSFLN	RDLGACIDCSARHIN	9	SARHINGGS
ASVYYSQLMCQPILL	7	LMCQPILLG	NFYGPFVDRQTAQAA	6	VDRQTAQAA	DLGACIDCSARHINA	8	SARHINAGG
YYSQLMCQPILLLDQ	10	LLLDQGGSG	FYGPFVDRQTAQAAG	5	VDRQTAQAA	ACIDCSARHINAQVA	9	INAQVAGGS
YSQLMCQPILLLDQA	9	LLLDQAGGS	YGPFVDRQTAQAAGT	4	VDRQTAQAA	NAQVAKSHNIALIWN	3	VAKSHNIAL
SQLMCQPILLLDQAL	8	LLLDQALGG	GPFVDRQTAQAAGTD	3	VDRQTAQAA	AQVAKSHNIALIWNV	2	VAKSHNIAL
QLMCQPILLLDQALV	7	LLLDQALVG	PFVDRQTAQAAGTDT	2	VDRQTAQAA	QVAKSHNIALIWNVK	1	VAKSHNIAL
LMCQPILLLDQALVS	6	LLLDQALVS	DRWFLNRFTTTLNDF	4	LNRFTTTLN	VAKSHNIALIWNVKD	0	VAKSHNIAL
MCQPILLLDQALVSD	5	LLLDQALVS	TTTLNDFNLVAMKYN	2	TLNDFNLVA	AKSHNIALIWNVKDF	10	NVKDFGGSG
CQPILLLDQALVSDV	4	LLLDQALVS	TTLNDFNLVAMKYNY	1	TLNDFNLVA	KSHNIALIWNVKDFM	10	VKDFMGGSG
QPILLLDQALVSDVG	3	LLLDQALVS	TLNDFNLVAMKYNYE	0	TLNDFNLVA	SHNIALIWNVKDFMS	9	VKDFMSGGS
LLLDQALVSDVGDSA	0	LLLDQALVS	LNDFNLVAMKYNYEP	3	FNLVAMKYN	HNIALIWNVKDFMSL	8	VKDFMSLGG
AEVAVKMFDAYVNTF	7	FDAYVNTFG	NDFNLVAMKYNYEPL	2	FNLVAMKYN	NIALIWNVKDFMSLS	7	VKDFMSLSG
EVAVKMFDAYVNTFS	9	YVNTFSGGS	DFNLVAMKYNYEPLT	1	FNLVAMKYN	KKNNLPFKLTCATTR	8	LTCATTRGG
KMFDAYVNTFSSTFN	6	VNTFSSTFN	NLVAMKYNYEPLTQD	1	LVAMKYNYE	KNNLPFKLTCATTRQ	7	LTCATTRQG
MFDAYVNTFSSTFNV	5	VNTFSSTFN	SAQTGIAVLDMCASL	7	VLDMCASLG	NNLPFKLTCATTRQV	6	LTCATTRQV
FDAYVNTFSSTFNVP	4	VNTFSSTFN	AQTGIAVLDMCASLK	6	VLDMCASLK	NLPFKLTCATTRQVV	5	LTCATTRQV
DAYVNTFSSTFNVPM	3	VNTFSSTFN	QTGIAVLDMCASLKE	5	VLDMCASLK	KLTCATTRQVVNVVT	9	VVNVVTGGS
AYVNTFSSTFNVPME	2	VNTFSSTFN	TGIAVLDMCASLKEL	4	VLDMCASLK	TCATTRQVVNVVTTK	7	VVNVVTTKG
YVNTFSSTFNVPMEK	1	VNTFSSTFN	GSALLEDEFTPFDVV	8	FTPFDVVGG	ATTRQVVNVVTTKIA	5	VVNVVTTKI
VNTFSSTFNVPMEKL	0	VNTFSSTFN	SALLEDEFTPFDVVR	7	FTPFDVVRG	SKHTDFSSEIIGYKA	9	IIGYKAGGS
NTFSSTFNVPMEKLK	2	FSSTFNVPM	ALLEDEFTPFDVVRQ	6	FTPFDVVRQ	KHTDFSSEIIGYKAI	8	IIGYKAIGG
TFSSTFNVPMEKLKT	1	FSSTFNVPM	LLEDEFTPFDVVRQC	10	VVRQCGGSG	HTDFSSEIIGYKAID	7	IIGYKAIDG
FSSTFNVPMEKLKTL	0	FSSTFNVPM	LEDEFTPFDVVRQCS	9	VVRQCSGGS	TDFSSEIIGYKAIDG	6	IIGYKAIDG
AEAELAKNVSLDNVL	8	VSLDNVLGG	EDEFTPFDVVRQCSG	8	VVRQCSGGG	DFSSEIIGYKAIDGG	5	IIGYKAIDG
EAELAKNVSLDNVLS	6	NVSLDNVLS	DEFTPFDVVRQCSGV	7	VVRQCSGVG	FSSEIIGYKAIDGGV	4	IIGYKAIDG
ELAKNVSLDNVLSTF	5	VSLDNVLST	EFTPFDVVRQCSGVT	6	VVRQCSGVT	SSEIIGYKAIDGGVT	3	IIGYKAIDG
LAKNVSLDNVLSTFI	4	VSLDNVLST	TPFDVVRQCSGVTFQ	4	VVRQCSGVT	SEIIGYKAIDGGVTR	2	IIGYKAIDG
SLDNVLSTFISAARQ	1	LDNVLSTFI	RIMTWLDMVDTSLSG	5	LDMVDTSLS	EIIGYKAIDGGVTRD	1	IIGYKAIDG
LSHQSDIEVTGDSCN	8	VTGDSCNGG	TWLDMVDTSLSGFKL	2	LDMVDTSLS	IDGGVTRDIASTDTC	8	IASTDTCGG
SHQSDIEVTGDSCNN	7	VTGDSCNNG	WLDMVDTSLSGFKLK	1	LDMVDTSLS	DGGVTRDIASTDTCF	7	IASTDTCFG
EVTGDSCNNYMLTYN	1	VTGDSCNNY	MVDTSLSGFKLKDCV	1	VDTSLSGFK	GGVTRDIASTDTCFA	6	IASTDTCFA
VTGDSCNNYMLTYNK	0	VTGDSCNNY	DTSLSGFKLKDCVMY	3	LSGFKLKDC	GVTRDIASTDTCFAN	5	IASTDTCFA
TGDSCNNYMLTYNKV	9	LTYNKVGGS	SGFKLKDCVMYASAV	8	VMYASAVGG	VTRDIASTDTCFANK	4	IASTDTCFA
DSCNNYMLTYNKVEN	9	YNKVENGGS	GFKLKDCVMYASAVV	7	VMYASAVVG	TRDIASTDTCFANKH	3	IASTDTCFA
SCNNYMLTYNKVENM	6	LTYNKVENM	YDDGARRVWTLMNVL	7	VWTLMNVLG	RDIASTDTCFANKHA	2	IASTDTCFA
CNNYMLTYNKVENMT	10	VENMTGGSG	DDGARRVWTLMNVLT	6	VWTLMNVLT	DIASTDTCFANKHAD	1	IASTDTCFA
NNYMLTYNKVENMTP	9	VENMTPGGS	YYGNALDQAISMWAL	5	LDQAISMWA	IASTDTCFANKHADF	0	IASTDTCFA
NYMLTYNKVENMTPR	3	LTYNKVENM	YGNALDQAISMWALI	4	LDQAISMWA	ADFDTWFSQRGGSYT	7	SQRGGSYTG
MLTYNKVENMTPRDL	1	LTYNKVENM	DYLVSTQEFRYMNSQ	7	EFRYMNSQG	SYTNDKACPLIAAVI	10	IAAVIGGSG
LTYNKVENMTPRDLG	0	LTYNKVENM	YLVSTQEFRYMNSQG	6	EFRYMNSQG	TNDKACPLIAAVITR	8	IAAVITRGG
TYNKVENMTPRDLGA	8	TPRDLGAGG	LVSTQEFRYMNSQGL	5	EFRYMNSQG	NDKACPLIAAVITRE	7	IAAVITREG
YNKVENMTPRDLGAC	10	DLGACGGSG	VSTQEFRYMNSQGLL	4	EFRYMNSQG	ACPLIAAVITREVGF	4	IAAVITREV
MTPRDLGACIDCSAR	7	ACIDCSARG	STQEFRYMNSQGLLP	3	EFRYMNSQG	FVVPGLPGTILRTTN	9	ILRTTNGGS
AQVAKSHNIALIWNV	2	VAKSHNIAL	TQEFRYMNSQGLLPP	2	EFRYMNSQG	VPGLPGTILRTTNGD	7	ILRTTNGDG
QVAKSHNIALIWNVK	1	VAKSHNIAL	QEFRYMNSQGLLPPK	1	EFRYMNSQG	PGLPGTILRTTNGDF	6	ILRTTNGDF
KKNNLPFKLTCATTR	8	LTCATTRGG	EFRYMNSQGLLPPKN	10	LPPKNGGSG	GLPGTILRTTNGDFL	5	ILRTTNGDF
KNNLPFKLTCATTRQ	7	LTCATTRQG	GLLPPKNSIDAFKLN	2	LPPKNSIDA	LPGTILRTTNGDFLH	4	ILRTTNGDF
NNLPFKLTCATTRQV	6	LTCATTRQV	LLGVGGKPCIKVATV	8	CIKVATVGG	PGTILRTTNGDFLHF	3	ILRTTNGDF
NLPFKLTCATTRQVV	5	LTCATTRQV	LGVGGKPCIKVATVQ	10	VATVQGGSG	GTILRTTNGDFLHFL	2	ILRTTNGDF
PFKLTCATTRQVVNV	7	TTRQVVNVG	GVGGKPCIKVATVQS	9	VATVQSGGS	TILRTTNGDFLHFLP	1	ILRTTNGDF
KLTCATTRQVVNVVT	5	TTRQVVNVV	VGGKPCIKVATVQSK	8	VATVQSKGG	DFLHFLPRVFSAVGN	9	FSAVGNGGS
TCATTRQVVNVVTTK	3	TTRQVVNVV	GGKPCIKVATVQSKM	7	VATVQSKMG	HFLPRVFSAVGNICY	2	LPRVFSAVG
KHTDFSSEIIGYKAI	8	IIGYKAIGG	GKPCIKVATVQSKMS	6	VATVQSKMS	PRVFSAVGNICYTPS	9	ICYTPSGGS
GYKAIDGGVTRDIAS	8	VTRDIASGG	KPCIKVATVQSKMSD	5	VATVQSKMS	RVFSAVGNICYTPSK	8	ICYTPSKGG
IDGGVTRDIASTDTC	8	IASTDTCGG	PCIKVATVQSKMSDV	4	VATVQSKMS	FSAVGNICYTPSKLI	6	ICYTPSKLI
DGGVTRDIASTDTCF	7	IASTDTCFG	MSDVKCTSVVLLSVL	8	VVLLSVLGG	SAVGNICYTPSKLIE	5	ICYTPSKLI
GGVTRDIASTDTCFA	6	IASTDTCFA	VLQQLRVESSSKLWA	0	VLQQLRVES	AVGNICYTPSKLIEY	4	ICYTPSKLI
GVTRDIASTDTCFAN	5	IASTDTCFA	RVESSSKLWAQCVQL	7	LWAQCVQLG	VGNICYTPSKLIEYT	3	ICYTPSKLI
VTRDIASTDTCFANK	4	IASTDTCFA	VESSSKLWAQCVQLH	0	VESSSKLWA	GNICYTPSKLIEYTD	2	ICYTPSKLI
TRDIASTDTCFANKH	3	IASTDTCFA	ESSSKLWAQCVQLHN	10	VQLHNGGSG	NICYTPSKLIEYTDF	1	ICYTPSKLI
RDIASTDTCFANKHA	2	IASTDTCFA	SSSKLWAQCVQLHND	9	VQLHNDGGS	DFATSACVLAAECTI	2	ATSACVLAA
DIASTDTCFANKHAD	1	IASTDTCFA	SSKLWAQCVQLHNDI	8	VQLHNDIGG	SACVLAAECTIFKDA	4	LAAECTIFK
WFSQRGGSYTNDKAC	8	YTNDKACGG	AQCVQLHNDILLAKD	9	ILLAKDGGS	ACVLAAECTIFKDAS	3	LAAECTIFK
FSQRGGSYTNDKACP	7	YTNDKACPG	QCVQLHNDILLAKDT	8	ILLAKDTGG	CVLAAECTIFKDASG	2	LAAECTIFK
SQRGGSYTNDKACPL	6	YTNDKACPL	CVQLHNDILLAKDTT	7	ILLAKDTTG	VLAAECTIFKDASGK	1	LAAECTIFK
QRGGSYTNDKACPLI	5	YTNDKACPL	QLHNDILLAKDTTEA	6	LLAKDTTEA	AECTIFKDASGKPVP	8	ASGKPVPGG
RGGSYTNDKACPLIA	4	YTNDKACPL	HNDILLAKDTTEAFE	4	LLAKDTTEA	ECTIFKDASGKPVPY	7	ASGKPVPYG
GGSYTNDKACPLIAA	3	YTNDKACPL	NDILLAKDTTEAFEK	3	LLAKDTTEA	VPYCYDTNVLEGSVA	7	NVLEGSVAG
GSYTNDKACPLIAAV	2	YTNDKACPL	DILLAKDTTEAFEKM	2	LLAKDTTEA	DTNVLEGSVAYESLR	8	VAYESLRGG
SYTNDKACPLIAAVI	1	YTNDKACPL	ILLAKDTTEAFEKMV	1	LLAKDTTEA	SLRPDTRYVLMDGSI	8	VLMDGSIGG
YTNDKACPLIAAVIT	0	YTNDKACPL	LLAKDTTEAFEKMVS	0	LLAKDTTEA	LRPDTRYVLMDGSII	7	VLMDGSIIG
TNDKACPLIAAVITR	1	NDKACPLIA	LAKDTTEAFEKMVSL	7	AFEKMVSLG	RPDTRYVLMDGSIIQ	6	VLMDGSIIQ
FVVPGLPGTILRTTN	9	ILRTTNGGS	AKDTTEAFEKMVSLL	7	FEKMVSLLG	PDTRYVLMDGSIIQF	5	VLMDGSIIQ
VVPGLPGTILRTTNG	8	ILRTTNGGG	KDTTEAFEKMVSLLS	10	VSLLSGGSG	DTRYVLMDGSIIQFP	4	VLMDGSIIQ
VPGLPGTILRTTNGD	7	ILRTTNGDG	DTTEAFEKMVSLLSV	9	VSLLSVGGS	TRYVLMDGSIIQFPN	3	VLMDGSIIQ
DFLHFLPRVFSAVGN	5	LPRVFSAVG	EKMVSLLSVLLSMQG	3	VSLLSVLLS	RYVLMDGSIIQFPNT	2	VLMDGSIIQ
HFLPRVFSAVGNICY	2	LPRVFSAVG	NKLCEEMLDNRATLQ	7	LDNRATLQG	YVLMDGSIIQFPNTY	1	VLMDGSIIQ
PRVFSAVGNICYTPS	2	VFSAVGNIC	KLCEEMLDNRATLQA	6	LDNRATLQA	LMDGSIIQFPNTYLE	5	IIQFPNTYL
RVFSAVGNICYTPSK	1	VFSAVGNIC	LCEEMLDNRATLQAI	5	LDNRATLQA	MDGSIIQFPNTYLEG	4	IIQFPNTYL
FSAVGNICYTPSKLI	6	ICYTPSKLI	CEEMLDNRATLQAIA	4	LDNRATLQA	DGSIIQFPNTYLEGS	3	IIQFPNTYL
SAVGNICYTPSKLIE	5	ICYTPSKLI	EEMLDNRATLQAIAS	3	LDNRATLQA	SIIQFPNTYLEGSVR	1	IIQFPNTYL
AVGNICYTPSKLIEY	4	ICYTPSKLI	EMLDNRATLQAIASE	2	LDNRATLQA	YLEGSVRVVTTFDSE	8	VTTFDSEGG
VGNICYTPSKLIEYT	3	ICYTPSKLI	MLDNRATLQAIASEF	1	LDNRATLQA	LEGSVRVVTTFDSEY	7	VTTFDSEYG
NICYTPSKLIEYTDF	10	EYTDFGGSG	LDNRATLQAIASEFS	0	LDNRATLQA	EGSVRVVTTFDSEYC	6	VTTFDSEYC
YTPSKLIEYTDFATS	8	YTDFATSGG	DNRATLQAIASEFSS	8	IASEFSSGG	GSVRVVTTFDSEYCR	5	VTTFDSEYC
TPSKLIEYTDFATSA	7	YTDFATSAG	NRATLQAIASEFSSL	7	IASEFSSLG	SVRVVTTFDSEYCRH	4	VTTFDSEYC
SKLIEYTDFATSACV	5	YTDFATSAC	RATLQAIASEFSSLP	7	ASEFSSLPG	VRVVTTFDSEYCRHG	3	VTTFDSEYC
KLIEYTDFATSACVL	4	YTDFATSAC	ATLQAIASEFSSLPS	6	ASEFSSLPS	RVVTTFDSEYCRHGT	2	VTTFDSEYC
LIEYTDFATSACVLA	7	ATSACVLAG	TLQAIASEFSSLPSY	5	ASEFSSLPS	YYRSLPGVFCGVDAV	7	VFCGVDAVG
IEYTDFATSACVLAA	6	ATSACVLAA	LQAIASEFSSLPSYA	4	ASEFSSLPS	GVFCGVDAVNLLTNM	8	VNLLTNMGG
EYTDFATSACVLAAE	5	ATSACVLAA	AIASEFSSLPSYAAF	2	ASEFSSLPS	FCGVDAVNLLTNMFT	6	VNLLTNMFT
YTDFATSACVLAAEC	4	ATSACVLAA	IASEFSSLPSYAAFA	1	ASEFSSLPS	CGVDAVNLLTNMFTP	5	VNLLTNMFT
DFATSACVLAAECTI	2	ATSACVLAA	SEFSSLPSYAAFATA	5	LPSYAAFAT	GVDAVNLLTNMFTPL	4	VNLLTNMFT
FATSACVLAAECTIF	1	ATSACVLAA	EFSSLPSYAAFATAQ	4	LPSYAAFAT	VDAVNLLTNMFTPLI	3	VNLLTNMFT
ACVLAAECTIFKDAS	9	IFKDASGGS	KSLNVAKSEFDRDAA	9	FDRDAAGGS	DAVNLLTNMFTPLIQ	2	VNLLTNMFT
CVLAAECTIFKDASG	8	IFKDASGGG	SLNVAKSEFDRDAAM	8	FDRDAAMGG	NLLTNMFTPLIQPIG	2	LTNMFTPLI
VLAAECTIFKDASGK	7	IFKDASGKG	QRKLEKMADQAMTQM	7	ADQAMTQMG	LTNMFTPLIQPIGAL	8	IQPIGALGG
AECTIFKDASGKPVP	4	IFKDASGKP	RKLEKMADQAMTQMY	6	ADQAMTQMY	TNMFTPLIQPIGALD	10	IGALDGGSG
ECTIFKDASGKPVPY	3	IFKDASGKP	KLEKMADQAMTQMYK	5	ADQAMTQMY	NMFTPLIQPIGALDI	6	IQPIGALDI
TIFKDASGKPVPYCY	1	IFKDASGKP	LEKMADQAMTQMYKQ	4	ADQAMTQMY	FTPLIQPIGALDISA	4	IQPIGALDI
KDASGKPVPYCYDTN	9	YCYDTNGGS	TMLRKLDNDALNNII	10	LNNIIGGSG	TPLIQPIGALDISAS	3	IQPIGALDI
DASGKPVPYCYDTNV	8	YCYDTNVGG	LDNDALNNIINNARD	5	LNNIINNAR	PLIQPIGALDISASI	2	IQPIGALDI
ASGKPVPYCYDTNVL	7	YCYDTNVLG	DNDALNNIINNARDG	4	LNNIINNAR	LIQPIGALDISASIV	9	ISASIVGGS
SGKPVPYCYDTNVLE	6	YCYDTNVLE	NDALNNIINNARDGC	3	LNNIINNAR	IQPIGALDISASIVA	6	LDISASIVA
GKPVPYCYDTNVLEG	5	YCYDTNVLE	DALNNIINNARDGCV	2	LNNIINNAR	QPIGALDISASIVAG	5	LDISASIVA
KPVPYCYDTNVLEGS	9	NVLEGSGGS	NNIINNARDGCVPLN	3	INNARDGCV	IGALDISASIVAGGI	5	ISASIVAGG
VPYCYDTNVLEGSVA	7	NVLEGSVAG	NIINNARDGCVPLNI	2	INNARDGCV	GALDISASIVAGGIV	4	ISASIVAGG
YCYDTNVLEGSVAYE	5	NVLEGSVAY	IINNARDGCVPLNII	1	INNARDGCV	ALDISASIVAGGIVA	3	ISASIVAGG
YDTNVLEGSVAYESL	3	NVLEGSVAY	KNTCDGTTFTYASAL	7	TFTYASALG	SASIVAGGIVAIVVT	4	VAGGIVAIV
DTNVLEGSVAYESLR	2	NVLEGSVAY	NTCDGTTFTYASALW	0	NTCDGTTFT	RAFGEYSHVVAFNTL	8	VVAFNTLGG
YESLRPDTRYVLMDG	10	VLMDGGGSG	WEIQQVVDADSKIVQ	5	VVDADSKIV	AFGEYSHVVAFNTLL	7	VVAFNTLLG
ESLRPDTRYVLMDGS	9	VLMDGSGGS	EIQQVVDADSKIVQL	4	VVDADSKIV	FGEYSHVVAFNTLLF	6	VVAFNTLLF
SLRPDTRYVLMDGSI	8	VLMDGSIGG	QQVVDADSKIVQLSE	2	VVDADSKIV	SFTVLCLTPVYSFLP	3	VLCLTPVYS
LRPDTRYVLMDGSII	7	VLMDGSIIG	QVVDADSKIVQLSEI	1	VVDADSKIV	YLTNDVSFLAHIQWM	1	LTNDVSFLA
RPDTRYVLMDGSIIQ	6	VLMDGSIIQ	VTALRANSAVKLQNN	2	ALRANSAVK	LTNDVSFLAHIQWMV	0	LTNDVSFLA
PDTRYVLMDGSIIQF	5	VLMDGSIIQ	TALRANSAVKLQNNE	1	ALRANSAVK	KRRVVFNGVSFSTFE	3	VVFNGVSFS
DTRYVLMDGSIIQFP	4	VLMDGSIIQ	ALRANSAVKLQNNEL	7	VKLQNNELG	RRVVFNGVSFSTFEE	2	VVFNGVSFS
TRYVLMDGSIIQFPN	3	VLMDGSIIQ	LRANSAVKLQNNELS	6	VKLQNNELS	RVVFNGVSFSTFEEA	1	VVFNGVSFS
RYVLMDGSIIQFPNT	2	VLMDGSIIQ	RANSAVKLQNNELSP	5	VKLQNNELS	VVFNGVSFSTFEEAA	0	VVFNGVSFS
YVLMDGSIIQFPNTY	1	VLMDGSIIQ	ANSAVKLQNNELSPV	4	VKLQNNELS	EAACCHLAKALNDFS	6	LAKALNDFS
VLMDGSIIQFPNTYL	0	VLMDGSIIQ	NSAVKLQNNELSPVA	3	VKLQNNELS	AKALNDFSNSGSDVL	3	LNDFSNSGS
SIIQFPNTYLEGSVR	7	TYLEGSVRG	SAVKLQNNELSPVAL	2	VKLQNNELS	SDVLYQPPQTSITSA	2	VLYQPPQTS
IIQFPNTYLEGSVRV	6	TYLEGSVRV	AVKLQNNELSPVALR	1	VKLQNNELS	PQTSITSAVLQSGFR	4	ITSAVLQSG
EGSVRVVTTFDSEYC	6	VTTFDSEYC	VKLQNNELSPVALRQ	0	VKLQNNELS	QTSITSAVLQSGFRK	3	ITSAVLQSG
VVTTFDSEYCRHGTC	1	VTTFDSEYC	QNNELSPVALRQMSC	7	VALRQMSCG	RKMAFPSGKVEGCMV	9	VEGCMVGGS
VTTFDSEYCRHGTCE	0	VTTFDSEYC	NNELSPVALRQMSCA	6	VALRQMSCA	KMAFPSGKVEGCMVQ	8	VEGCMVQGG
CVSTSGRWVLNNDYY	9	LNNDYYGGS	ELSPVALRQMSCAAG	4	VALRQMSCA	MAFPSGKVEGCMVQV	7	VEGCMVQVG
RWVLNNDYYRSLPGV	7	YYRSLPGVG	LSPVALRQMSCAAGT	3	VALRQMSCA	AFPSGKVEGCMVQVT	6	VEGCMVQVT
VLNNDYYRSLPGVFC	5	YYRSLPGVF	SPVALRQMSCAAGTT	2	VALRQMSCA	FPSGKVEGCMVQVTC	5	VEGCMVQVT
LNNDYYRSLPGVFCG	4	YYRSLPGVF	ACTDDNALAYYNTTK	7	LAYYNTTKG	PSGKVEGCMVQVTCG	4	VEGCMVQVT
NNDYYRSLPGVFCGV	3	YYRSLPGVF	CTDDNALAYYNTTKG	6	LAYYNTTKG	GKVEGCMVQVTCGTT	2	VEGCMVQVT
NDYYRSLPGVFCGVD	2	YYRSLPGVF	DDNALAYYNTTKGGR	4	LAYYNTTKG	VEGCMVQVTCGTTTL	7	VTCGTTTLG
DYYRSLPGVFCGVDA	1	YYRSLPGVF	DNALAYYNTTKGGRF	3	LAYYNTTKG	CGTTTLNGLWLDDVV	10	LDDVVGGSG
YYRSLPGVFCGVDAV	0	YYRSLPGVF	YNTTKGGRFVLALLS	9	VLALLSGGS	DVVYCPRHVICTSED	8	VICTSEDGG
YRSLPGVFCGVDAVN	9	GVDAVNGGS	GLNNLNRGMVLGSLA	4	LNRGMVLGS	YCPRHVICTSEDMLN	10	EDMLNGGSG
PGVFCGVDAVNLLTN	5	GVDAVNLLT	NLNRGMVLGSLAATV	7	LGSLAATVG	CPRHVICTSEDMLNP	5	ICTSEDMLN
GVFCGVDAVNLLTNM	4	GVDAVNLLT	LGSLAATVRLQAGNA	0	LGSLAATVR	PRHVICTSEDMLNPN	4	ICTSEDMLN
CGVDAVNLLTNMFTP	1	GVDAVNLLT	ATEVPANSTVLSFCA	2	EVPANSTVL	RHVICTSEDMLNPNY	3	ICTSEDMLN
GVDAVNLLTNMFTPL	0	GVDAVNLLT	TEVPANSTVLSFCAF	1	EVPANSTVL	NYEDLLIRKSNHNFL	5	LIRKSNHNF
VDAVNLLTNMFTPLI	6	LTNMFTPLI	EVPANSTVLSFCAFA	7	VLSFCAFAG	YEDLLIRKSNHNFLV	4	LIRKSNHNF
DAVNLLTNMFTPLIQ	5	LTNMFTPLI	VPANSTVLSFCAFAV	6	VLSFCAFAV	RKSNHNFLVQAGNVQ	7	LVQAGNVQG
NLLTNMFTPLIQPIG	2	LTNMFTPLI	PANSTVLSFCAFAVD	5	VLSFCAFAV	SNHNFLVQAGNVQLR	5	LVQAGNVQL
LLTNMFTPLIQPIGA	1	LTNMFTPLI	ANSTVLSFCAFAVDA	4	VLSFCAFAV	NHNFLVQAGNVQLRV	4	LVQAGNVQL
LTNMFTPLIQPIGAL	0	LTNMFTPLI	NSTVLSFCAFAVDAA	3	VLSFCAFAV	NFLVQAGNVQLRVIG	2	LVQAGNVQL
TNMFTPLIQPIGALD	0	TNMFTPLIQ	SGGQPITNCVKMLCT	6	TNCVKMLCT	QAGNVQLRVIGHSMQ	3	NVQLRVIGH
NMFTPLIQPIGALDI	10	GALDIGGSG	GGQPITNCVKMLCTH	5	TNCVKMLCT	VIGHSMQNCVLKLKV	9	VLKLKVGGS
LIQPIGALDISASIV	5	GALDISASI	GQPITNCVKMLCTHT	4	TNCVKMLCT	GHSMQNCVLKLKVDT	7	VLKLKVDTG
IQPIGALDISASIVA	6	LDISASIVA	TNCVKMLCTHTGTGQ	0	TNCVKMLCT	SMQNCVLKLKVDTAN	5	VLKLKVDTA
QPIGALDISASIVAG	5	LDISASIVA	NCVKMLCTHTGTGQA	2	VKMLCTHTG	MQNCVLKLKVDTANP	4	VLKLKVDTA
PIGALDISASIVAGG	4	LDISASIVA	TCANDPVGFTLKNTV	8	FTLKNTVGG	QNCVLKLKVDTANPK	3	VLKLKVDTA
TVLCLTPVYSFLPGV	7	VYSFLPGVG	CANDPVGFTLKNTVC	7	FTLKNTVCG	NCVLKLKVDTANPKT	2	VLKLKVDTA
CLTPVYSFLPGVYSV	4	VYSFLPGVY	EPMLQSADAQSFLNR	5	SADAQSFLN	VRIQPGQTFSVLACY	2	IQPGQTFSV
LTPVYSFLPGVYSVI	3	VYSFLPGVY	SADAQSFLNRVCGVS	0	SADAQSFLN	GQTFSVLACYNGSPS	0	GQTFSVLAC
TPVYSFLPGVYSVIY	2	VYSFLPGVY	ADAQSFLNRVCGVSA	6	LNRVCGVSA	SPSGVYQCAMRPNFT	4	VYQCAMRPN
TFYLTNDVSFLAHIQ	3	LTNDVSFLA	DAQSFLNRVCGVSAA	5	LNRVCGVSA	YQCAMRPNFTIKGSF	10	IKGSFGGSG
YLTNDVSFLAHIQWM	1	LTNDVSFLA	GTGTSTDVVYRAFDI	8	VYRAFDIGG	SCGSVGFNIDYDCVS	8	IDYDCVSGG
LTNDVSFLAHIQWMV	0	LTNDVSFLA	TGTSTDVVYRAFDIY	7	VYRAFDIYG	CGSVGFNIDYDCVSF	7	IDYDCVSFG
QWMVMFTPLVPFWIT	5	FTPLVPFWI	GTSTDVVYRAFDIYN	6	VYRAFDIYN	GSVGFNIDYDCVSFC	6	IDYDCVSFC
EEAALCTFLLNKEMY	1	EAALCTFLL	TSTDVVYRAFDIYND	5	VYRAFDIYN	SVGFNIDYDCVSFCY	5	IDYDCVSFC
LNKEMYLKLRSDVLL	8	LRSDVLLGG	KDEDDNLIDSYFVVK	7	IDSYFVVKG	VGFNIDYDCVSFCYM	4	IDYDCVSFC
NKEMYLKLRSDVLLP	7	LRSDVLLPG	DNLIDSYFVVKRHTF	3	IDSYFVVKR	GPFVDRQTAQAAGTD	3	VDRQTAQAA
KEMYLKLRSDVLLPL	6	LRSDVLLPL	DSYFVVKRHTFSNYQ	4	VVKRHTFSN	AGTDTTITVNVLAWL	0	AGTDTTITV
LPLTQYNRYLALYNK	5	YNRYLALYN	HEETIYNLLKDCPAV	1	EETIYNLLK	INGDRWFLNRFTTTL	7	LNRFTTTLG
NKYKYFSGAMDTTSY	5	FSGAMDTTS	EETIYNLLKDCPAVA	6	LLKDCPAVA	TTTLNDFNLVAMKYN	2	TLNDFNLVA
KYFSGAMDTTSYREA	2	FSGAMDTTS	DFFKFRIDGDMVPHI	6	IDGDMVPHI	TTLNDFNLVAMKYNY	1	TLNDFNLVA
FSGAMDTTSYREAAC	0	FSGAMDTTS	FKFRIDGDMVPHISR	4	IDGDMVPHI	ILGPLSAQTGIAVLD	1	LGPLSAQTG
SGAMDTTSYREAACC	5	TTSYREAAC	KFRIDGDMVPHISRQ	3	IDGDMVPHI	LSAQTGIAVLDMCAS	8	VLDMCASGG
GAMDTTSYREAACCH	4	TTSYREAAC	IDGDMVPHISRQRLT	8	ISRQRLTGG	SAQTGIAVLDMCASL	7	VLDMCASLG
AMDTTSYREAACCHL	3	TTSYREAAC	GDMVPHISRQRLTKY	6	ISRQRLTKY	AQTGIAVLDMCASLK	7	LDMCASLKG
MDTTSYREAACCHLA	2	TTSYREAAC	DMVPHISRQRLTKYT	10	LTKYTGGSG	QTGIAVLDMCASLKE	5	VLDMCASLK
DTTSYREAACCHLAK	1	TTSYREAAC	EGNCDTLKEILVTYN	6	LKEILVTYN	TGIAVLDMCASLKEL	4	VLDMCASLK
TTSYREAACCHLAKA	0	TTSYREAAC	GNCDTLKEILVTYNC	5	LKEILVTYN	KELLQNGMNGRTILG	3	LQNGMNGRT
TSYREAACCHLAKAL	10	LAKALGGSG	NCDTLKEILVTYNCC	4	LKEILVTYN	LLQNGMNGRTILGSA	10	ILGSAGGSG
SYREAACCHLAKALN	9	LAKALNGGS	DTLKEILVTYNCCDD	2	LKEILVTYN	RTILGSALLEDEFTP	8	LEDEFTPGG
CHLAKALNDFSNSGS	2	LAKALNDFS	EILVTYNCCDDDYFN	0	EILVTYNCC	GSALLEDEFTPFDVV	8	FTPFDVVGG
HLAKALNDFSNSGSD	1	LAKALNDFS	YDFVENPDILRVYAN	8	ILRVYANGG	SALLEDEFTPFDVVR	7	FTPFDVVRG
ALNDFSNSGSDVLYQ	1	LNDFSNSGS	DFVENPDILRVYANL	7	ILRVYANLG	LEDEFTPFDVVRQCS	9	VVRQCSGGS
LNDFSNSGSDVLYQP	0	LNDFSNSGS	FVENPDILRVYANLG	6	ILRVYANLG	EDEFTPFDVVRQCSG	8	VVRQCSGGG
NDFSNSGSDVLYQPP	2	FSNSGSDVL	VENPDILRVYANLGE	5	ILRVYANLG	DEFTPFDVVRQCSGV	7	VVRQCSGVG
DFSNSGSDVLYQPPQ	1	FSNSGSDVL	ENPDILRVYANLGER	4	ILRVYANLG	EFTPFDVVRQCSGVT	6	VVRQCSGVT
KMAFPSGKVEGCMVQ	3	FPSGKVEGC	NPDILRVYANLGERV	3	ILRVYANLG	FTPFDVVRQCSGVTF	5	VVRQCSGVT
MAFPSGKVEGCMVQV	2	FPSGKVEGC	PDILRVYANLGERVR	2	ILRVYANLG	TPFDVVRQCSGVTFQ	4	VVRQCSGVT
GKVEGCMVQVTCGTT	9	VTCGTTGGS	DILRVYANLGERVRQ	1	ILRVYANLG	PFDVVRQCSGVTFQS	3	VVRQCSGVT
TCGTTTLNGLWLDDV	9	LWLDDVGGS	CDAMRNAGIVGVLTL	8	IVGVLTLGG	DVVRQCSGVTFQSAV	1	VVRQCSGVT
CGTTTLNGLWLDDVV	8	LWLDDVVGG	RNAGIVGVLTLDNQD	7	VLTLDNQDG	VVRQCSGVTFQSAVK	0	VVRQCSGVT
GTTTLNGLWLDDVVY	7	LWLDDVVYG	NAGIVGVLTLDNQDL	6	VLTLDNQDL	NAFLPFAMGIIAMSA	10	IAMSAGGSG
TTTLNGLWLDDVVYC	6	LWLDDVVYC	TPGSGVPVVDSYYSL	8	VDSYYSLGG	NMVYMPASWVMRIMT	9	VMRIMTGGS
TTLNGLWLDDVVYCP	5	LWLDDVVYC	VDSYYSLLMPILTLT	10	ILTLTGGSG	RIMTWLDMVDTSLSG	5	LDMVDTSLS
TLNGLWLDDVVYCPR	4	LWLDDVVYC	MPILTLTRALTAESH	5	LTRALTAES	MTWLDMVDTSLSGFK	3	LDMVDTSLS
LNGLWLDDVVYCPRH	3	LWLDDVVYC	VNCLDDRCILHCANF	0	VNCLDDRCI	TWLDMVDTSLSGFKL	2	LDMVDTSLS
NGLWLDDVVYCPRHV	2	LWLDDVVYC	NCLDDRCILHCANFN	6	CILHCANFN	WLDMVDTSLSGFKLK	1	LDMVDTSLS
GLWLDDVVYCPRHVI	1	LWLDDVVYC	CLDDRCILHCANFNV	9	CANFNVGGS	LDMVDTSLSGFKLKD	0	LDMVDTSLS
LWLDDVVYCPRHVIC	0	LWLDDVVYC	LDDRCILHCANFNVL	8	CANFNVLGG	GFKLKDCVMYASAVV	7	VMYASAVVG
DVVYCPRHVICTSED	8	VICTSEDGG	DDRCILHCANFNVLF	7	CANFNVLFG	VYDDGARRVWTLMNV	0	VYDDGARRV
VYCPRHVICTSEDML	7	ICTSEDMLG	HFRELGVVHNQDVNL	7	VHNQDVNLG	YDDGARRVWTLMNVL	7	VWTLMNVLG
YCPRHVICTSEDMLN	6	ICTSEDMLN	FRELGVVHNQDVNLH	6	VHNQDVNLH	DDGARRVWTLMNVLT	6	VWTLMNVLT
CPRHVICTSEDMLNP	5	ICTSEDMLN	RELGVVHNQDVNLHS	10	VNLHSGGSG	DGARRVWTLMNVLTL	5	VWTLMNVLT
PRHVICTSEDMLNPN	4	ICTSEDMLN	ELGVVHNQDVNLHSS	9	VNLHSSGGS	CVEYCPIFFITGNTL	8	FITGNTLGG
RHVICTSEDMLNPNY	3	ICTSEDMLN	LGVVHNQDVNLHSSR	8	VNLHSSRGG	VEYCPIFFITGNTLQ	7	FITGNTLQG
LIRKSNHNFLVQAGN	9	LVQAGNGGS	GVVHNQDVNLHSSRL	7	VNLHSSRLG	DYLVSTQEFRYMNSQ	7	EFRYMNSQG
RKSNHNFLVQAGNVQ	7	LVQAGNVQG	VVHNQDVNLHSSRLS	6	VNLHSSRLS	LVSTQEFRYMNSQGL	5	EFRYMNSQG
KSNHNFLVQAGNVQL	6	LVQAGNVQL	VHNQDVNLHSSRLSF	5	VNLHSSRLS	VSTQEFRYMNSQGLL	4	EFRYMNSQG
SNHNFLVQAGNVQLR	5	LVQAGNVQL	HNQDVNLHSSRLSFK	4	VNLHSSRLS	QEFRYMNSQGLLPPK	1	EFRYMNSQG
NHNFLVQAGNVQLRV	4	LVQAGNVQL	NQDVNLHSSRLSFKE	3	VNLHSSRLS	EFRYMNSQGLLPPKN	0	EFRYMNSQG
HNFLVQAGNVQLRVI	3	LVQAGNVQL	QDVNLHSSRLSFKEL	2	VNLHSSRLS	NSIDAFKLNIKLLGV	9	IKLLGVGGS
SMQNCVLKLKVDTAN	8	LKVDTANGG	DVNLHSSRLSFKELL	1	VNLHSSRLS	SIDAFKLNIKLLGVG	8	IKLLGVGGG
MQNCVLKLKVDTANP	7	LKVDTANPG	VNLHSSRLSFKELLV	0	VNLHSSRLS	LLGVGGKPCIKVATV	9	IKVATVGGS
QNCVLKLKVDTANPK	6	LKVDTANPK	SFKELLVYAADPAMH	1	FKELLVYAA	LGVGGKPCIKVATVQ	10	VATVQGGSG
NCVLKLKVDTANPKT	5	LKVDTANPK	AMHAASGNLLLDKRT	6	GNLLLDKRT	GVGGKPCIKVATVQS	9	VATVQSGGS
TANPKTPKYKFVRIQ	10	FVRIQGGSG	MHAASGNLLLDKRTT	5	GNLLLDKRT	VGGKPCIKVATVQSK	8	VATVQSKGG
PKYKFVRIQPGQTFS	4	FVRIQPGQT	HAASGNLLLDKRTTC	4	GNLLLDKRT	GGKPCIKVATVQSKM	7	VATVQSKMG
KYKFVRIQPGQTFSV	3	FVRIQPGQT	AASGNLLLDKRTTCF	3	GNLLLDKRT	GKPCIKVATVQSKMS	6	VATVQSKMS
RIQPGQTFSVLACYN	10	LACYNGGSG	ASGNLLLDKRTTCFS	2	GNLLLDKRT	KPCIKVATVQSKMSD	5	VATVQSKMS
IQPGQTFSVLACYNG	3	GQTFSVLAC	SGNLLLDKRTTCFSV	1	GNLLLDKRT	PCIKVATVQSKMSDV	4	VATVQSKMS
QPGQTFSVLACYNGS	8	LACYNGSGG	GNLLLDKRTTCFSVA	0	GNLLLDKRT	KMSDVKCTSVVLLSV	4	VKCTSVVLL
PGQTFSVLACYNGSP	7	LACYNGSPG	NLLLDKRTTCFSVAA	7	TTCFSVAAG	MSDVKCTSVVLLSVL	8	VVLLSVLGG
GQTFSVLACYNGSPS	6	LACYNGSPS	LLLDKRTTCFSVAAL	6	TTCFSVAAL	SDVKCTSVVLLSVLQ	7	VVLLSVLQG
QTFSVLACYNGSPSG	5	LACYNGSPS	DKRTTCFSVAALTNN	8	VAALTNNGG	DVKCTSVVLLSVLQQ	6	VVLLSVLQQ
YNGSPSGVYQCAMRP	0	YNGSPSGVY	KRTTCFSVAALTNNV	7	VAALTNNVG	KCTSVVLLSVLQQLR	4	VVLLSVLQQ
SPSGVYQCAMRPNFT	3	GVYQCAMRP	RTTCFSVAALTNNVA	6	VAALTNNVA	SVLQQLRVESSSKLW	2	LQQLRVESS
PSGVYQCAMRPNFTI	2	GVYQCAMRP	TTCFSVAALTNNVAF	5	VAALTNNVA	VLQQLRVESSSKLWA	1	LQQLRVESS
NFTIKGSFLNGSCGS	3	IKGSFLNGS	TCFSVAALTNNVAFQ	4	VAALTNNVA	LQQLRVESSSKLWAQ	0	LQQLRVESS
KGSFLNGSCGSVGFN	4	LNGSCGSVG	CFSVAALTNNVAFQT	3	VAALTNNVA	QQLRVESSSKLWAQC	2	LRVESSSKL
NGSCGSVGFNIDYDC	10	IDYDCGGSG	FSVAALTNNVAFQTV	2	VAALTNNVA	QLRVESSSKLWAQCV	1	LRVESSSKL
[truncated: 1,737 more rows]

## Sheet: 1C-Dengue
dna	name	aa	count_doped_401 R0 (doped)	count_doped_401 post-R1	count_doped_401 post-R2	count_doped_401 post-R3	count_doped_401 post-R4	count_doped_402 R0 (doped)	count_doped_402 post-R1	count_doped_402 post-R2	count_doped_402 post-R3	count_doped_402 post-R4	count_undoped_401 R0	count_undoped_402 R0	count_undoped_401 post-R1-positive	count_undoped_402 post-R1-positive	count_undoped_401 post-R1-negative	count_undoped_402 post-R1-negative	count_undoped_401 post-R2-positive	count_undoped_402 post-R2-positive	count_undoped_401 post-R2-negative	count_undoped_402 post-R2-negative	count_undoped_401 post-R3-positive	count_undoped_402 post-R3-positive	count_undoped_401 post-R3-negative	count_undoped_402 post-R3-negative
[truncated: 483,306+ more rows]

[truncated: 1 more sheets: 1D-Primers]
